# Supplementary material for: A workflow to optimize spatial sampling in ecoacoustic studies
Source: Research Square preprint supplement (doi:10.21203/rs.3.rs-7207339/v1), 2025-10-10

# All / Poles\_SLIC\_L\_proxy / Comparison

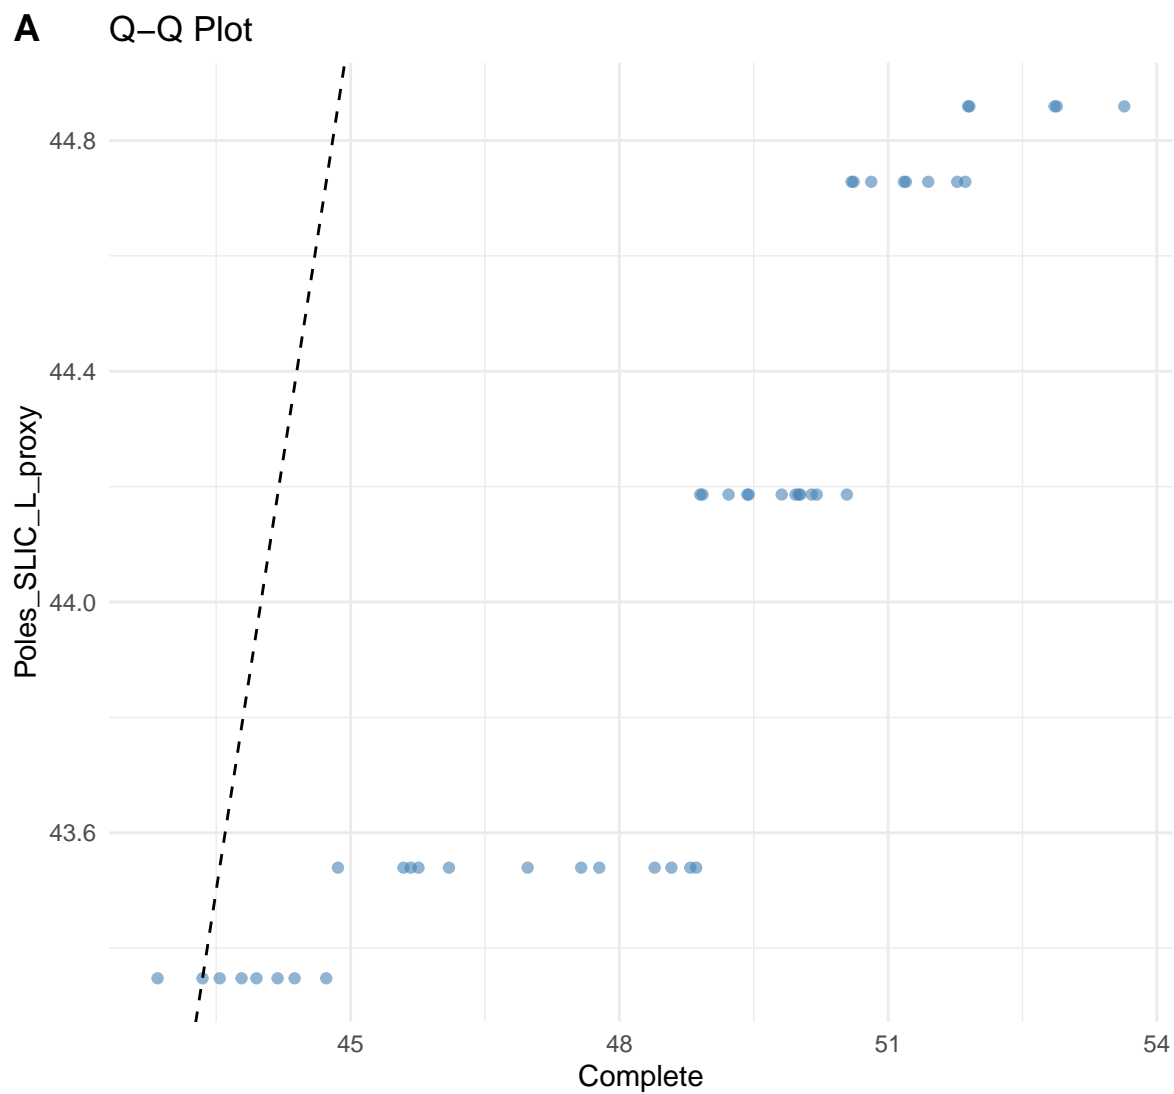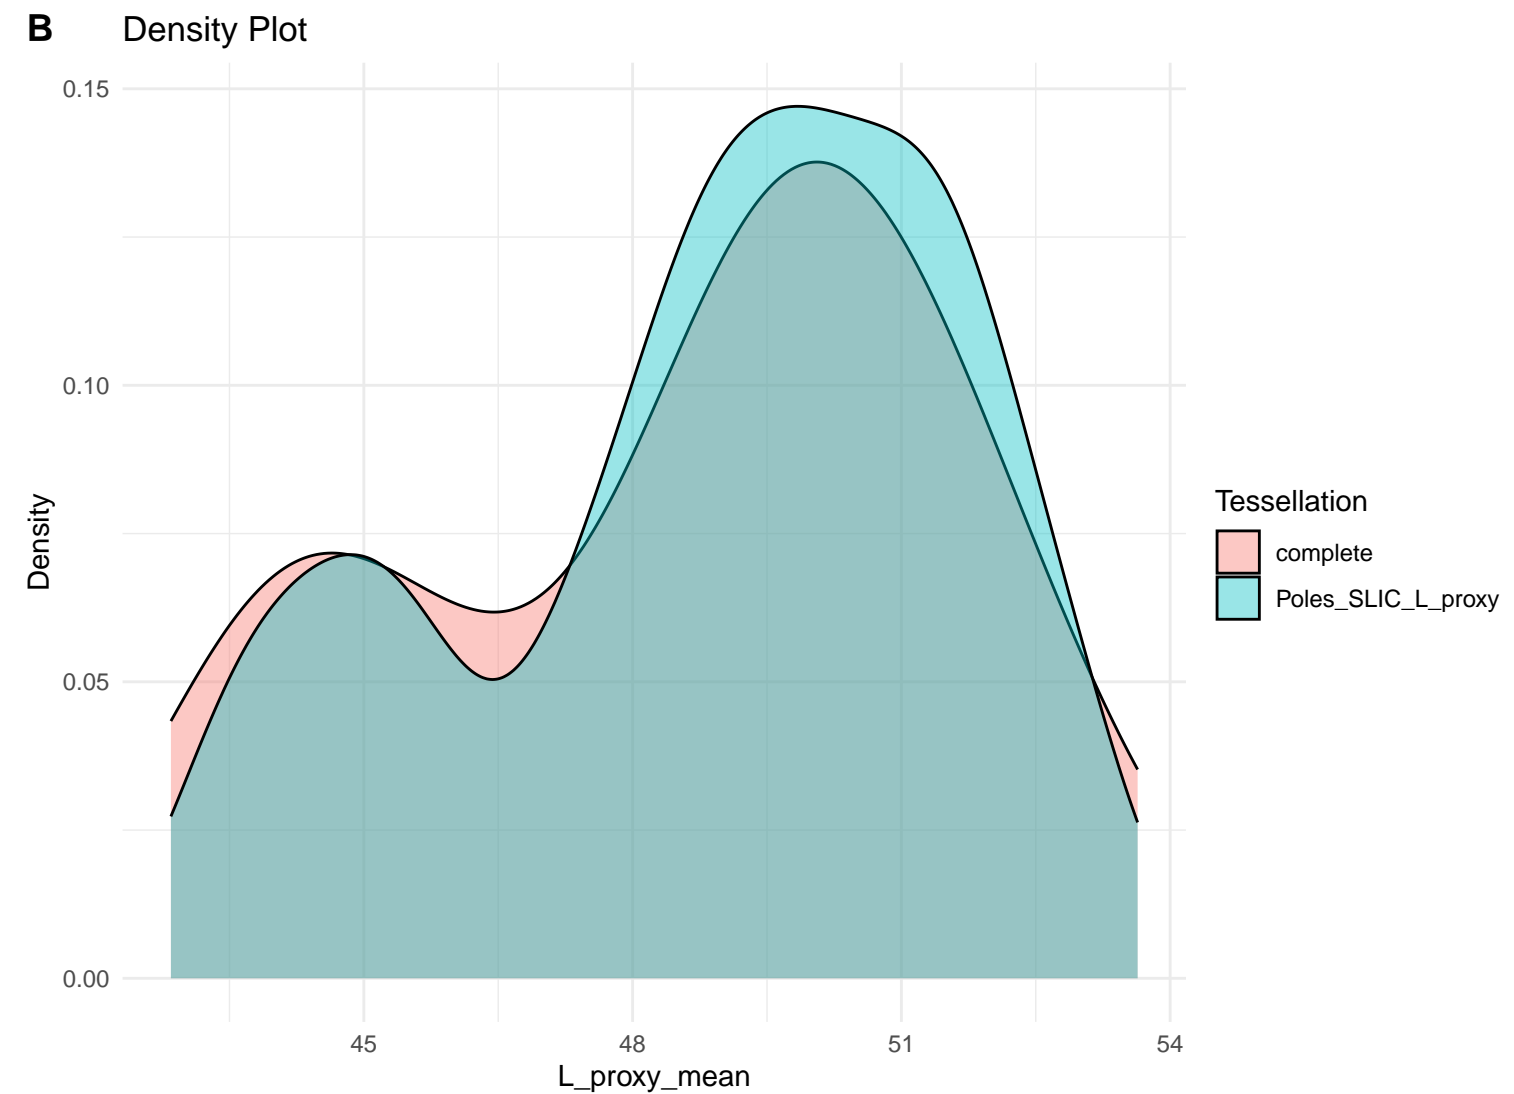

# All / Poles\_Landcover\_L\_proxy / Comparison

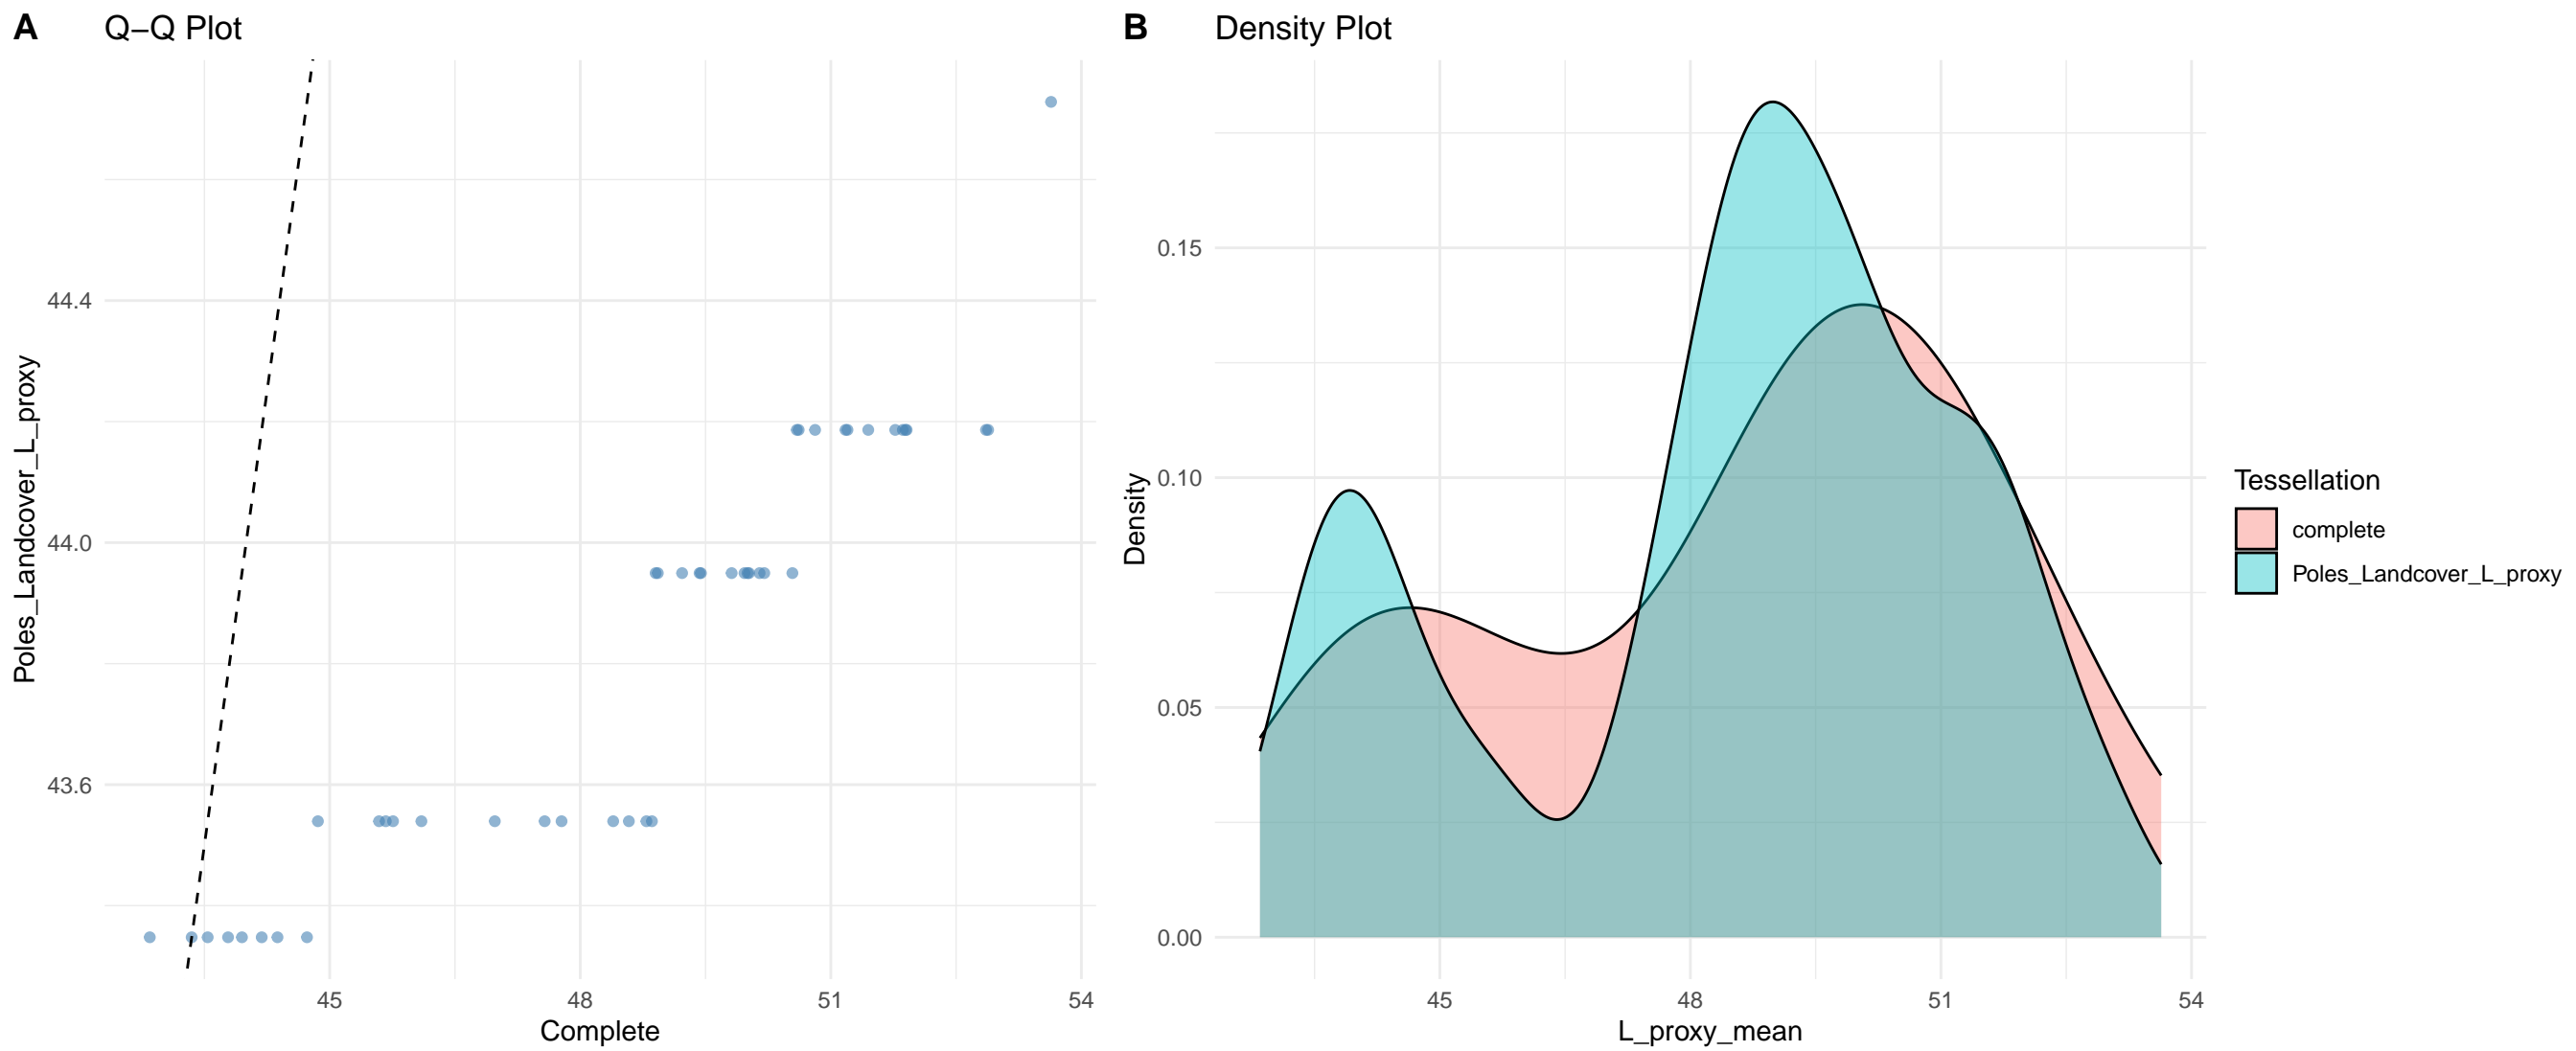

# All / Poles\_halfbasins\_L\_proxy / Comparison

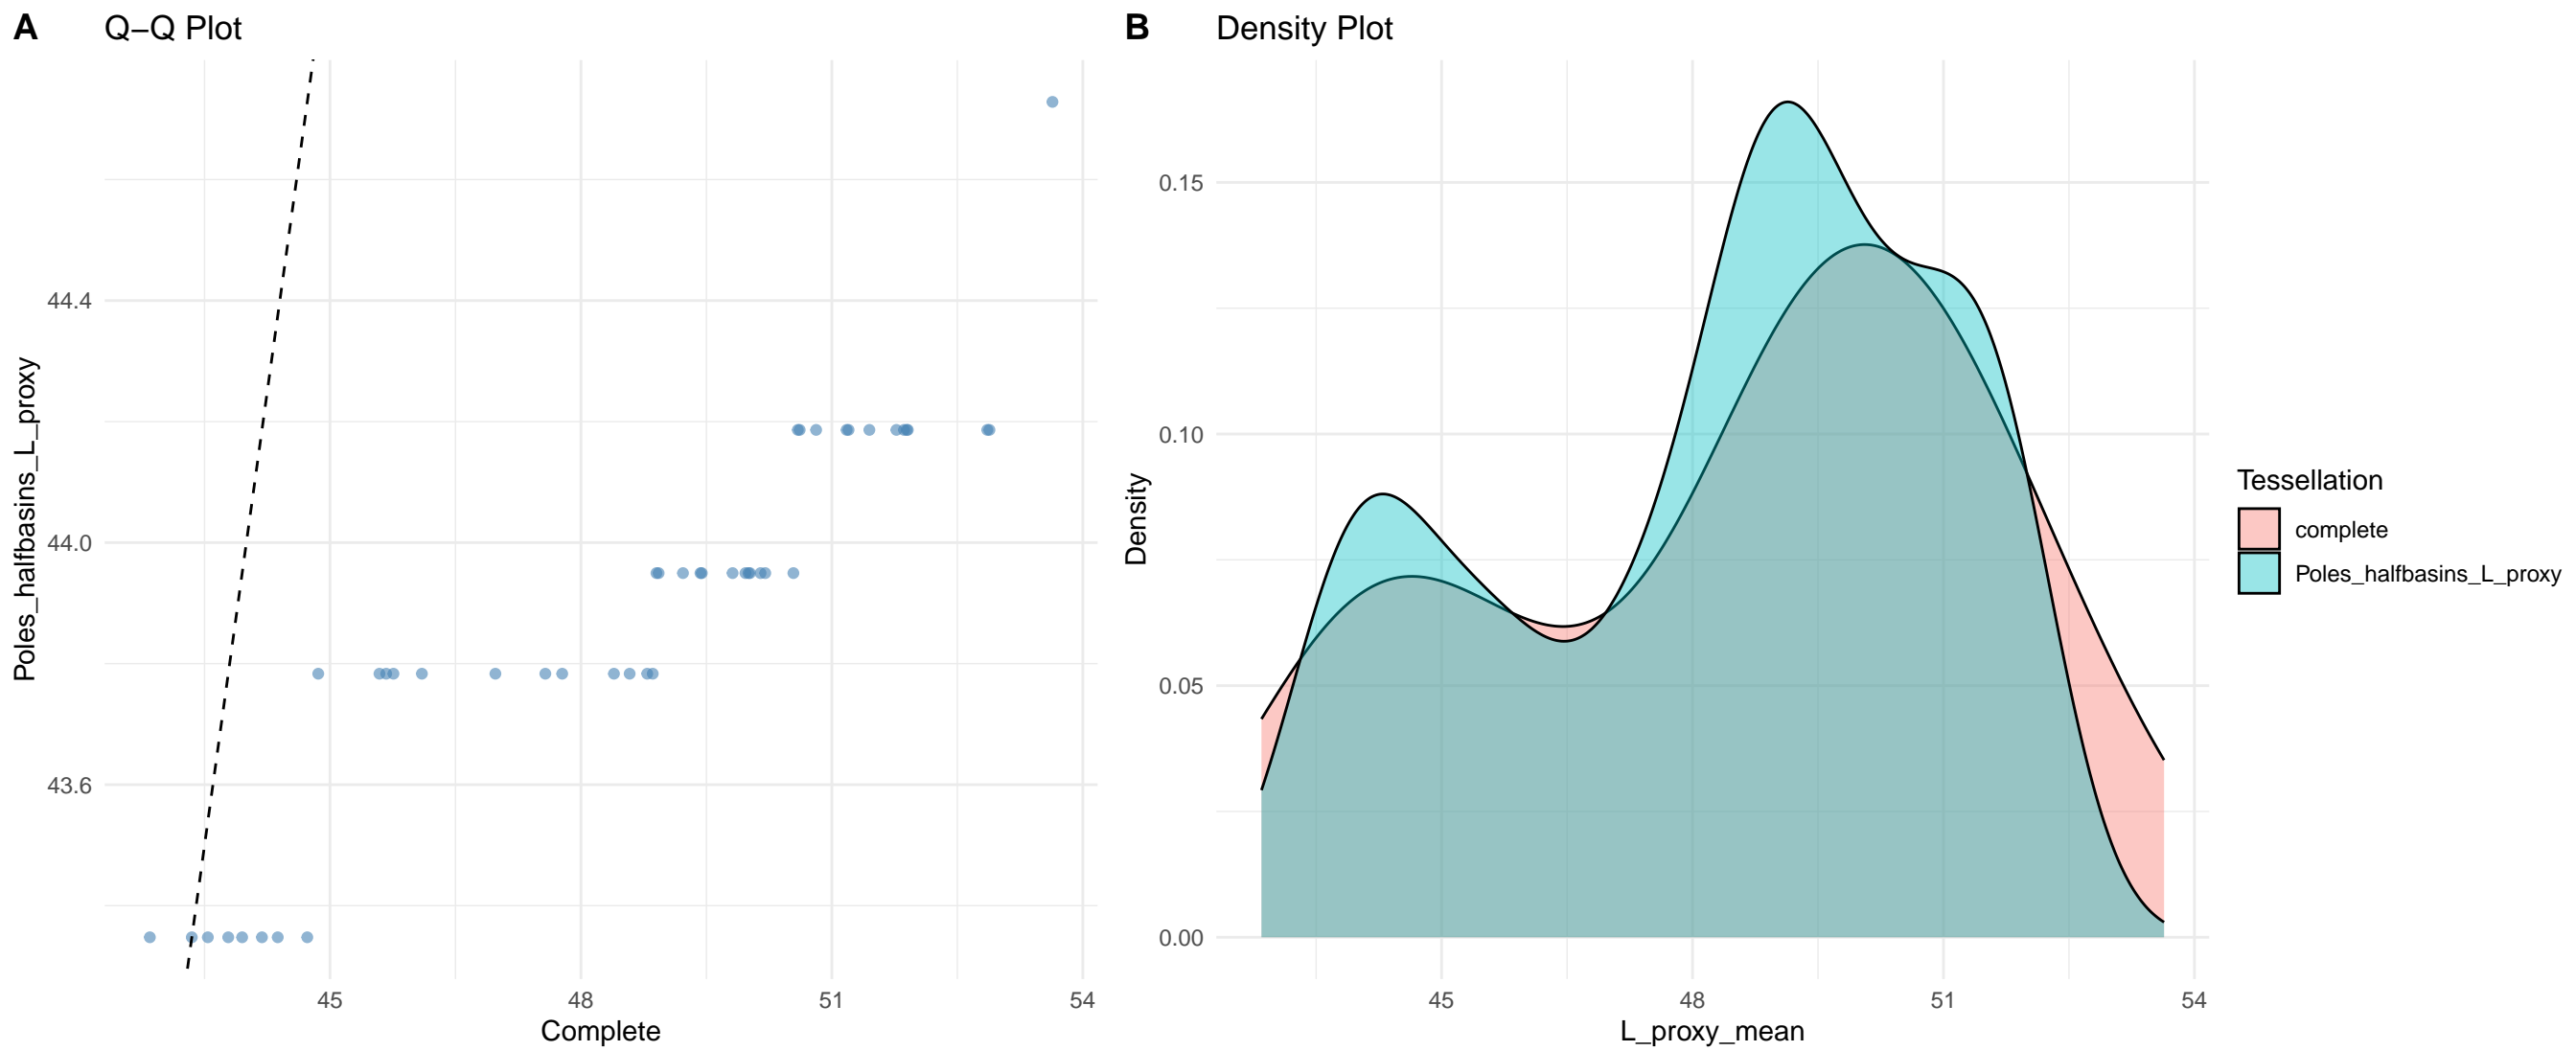

# All / Poles\_basins\_L\_proxy / Comparison

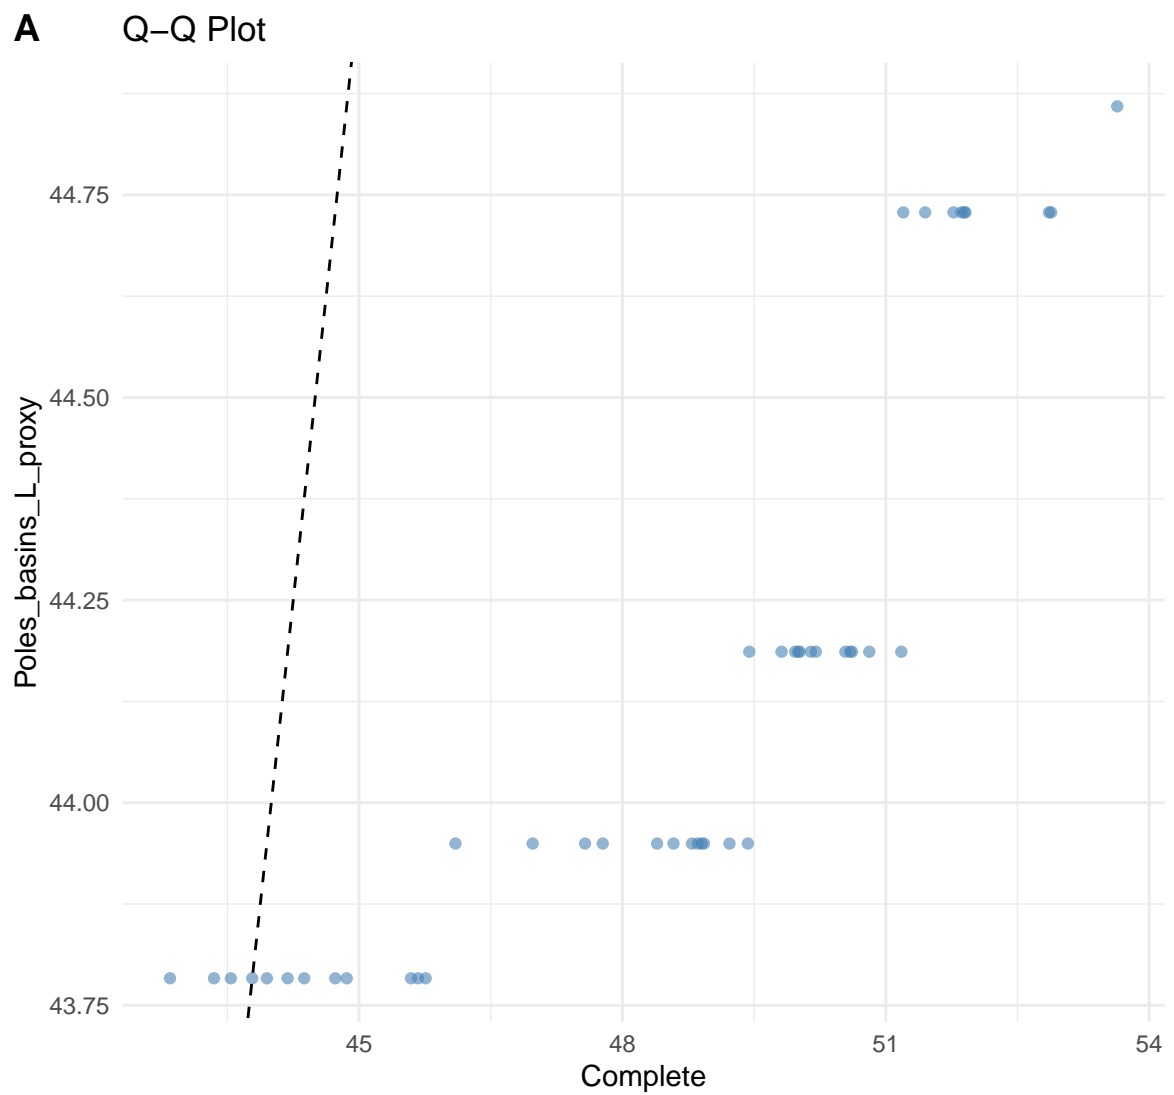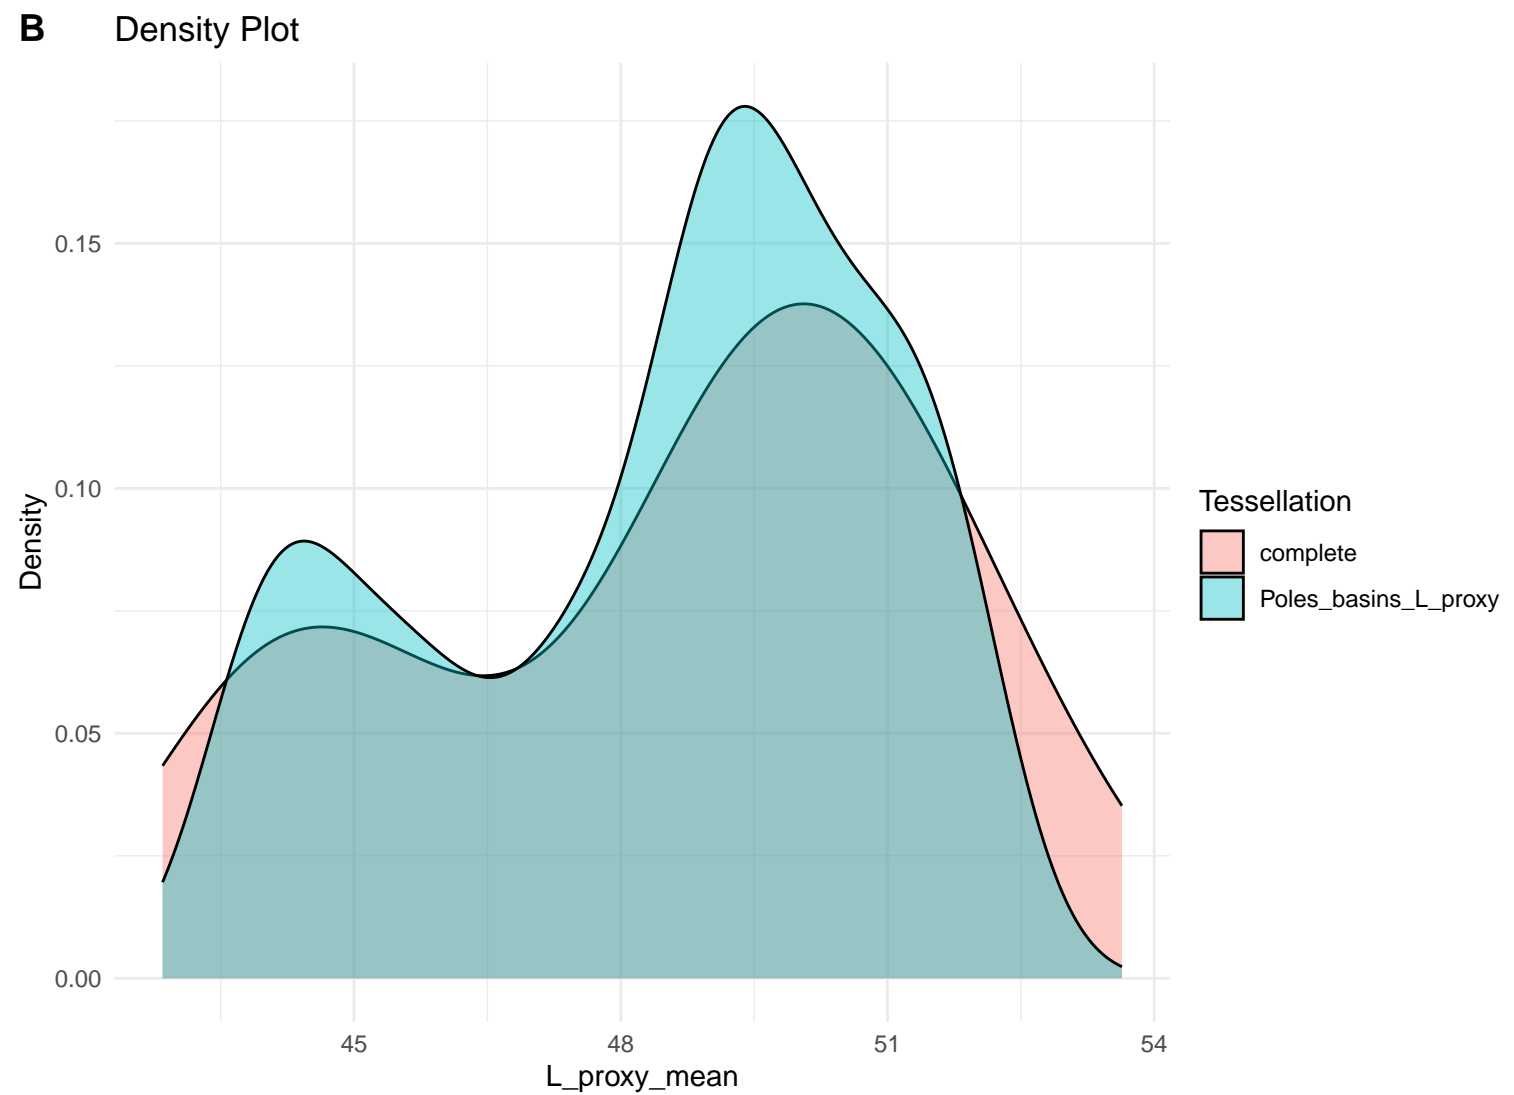

Supplement: Supplementary file 2 [file Comparative_Plots_Lproxy_mean_POLYPOLES_ALLTOGETHER.pdf › Online_Resoures-SUPPLEMENTARY_INFORMATION/Supplementary_information_S10_COLAB_for_workflow/Example_files/Comparative_Plots_Lproxy_mean_POLYPOLES_ALLTOGETHER.pdf]
