# Supplementary material for: A workflow to optimize spatial sampling in ecoacoustic studies
Source: Research Square preprint supplement (doi:10.21203/rs.3.rs-7207339/v1), 2025-10-10
Supplement: Supplementary file 7 [file Comparative_Stats_Lproxy_mean_POLYPOLES_ALLTOGETHER.xlsx]

## Sheet: Sheet 1
Locality
