# Supplementary material for: A workflow to optimize spatial sampling in ecoacoustic studies
Source: Research Square preprint supplement (doi:10.21203/rs.3.rs-7207339/v1), 2025-10-10
Supplement: Supplementary file 10 [file Landscape_Means_and_Distances.xlsx]

## Sheet: Sheet1
ID	Origin	X	Y	L_proxy_mean
1	complete	487943	706572	45.7585
2	complete	487936	706167	44.1863
3	complete	487941	705773	49.2196
4	complete	487938	705379	48.582
5	complete	488333	706979	44.7284
6	complete	488339	706566	45.6716
7	complete	488341	706169	43.7833
8	complete	488345	705775	47.5741
9	complete	488273	705422	50.5928
10	complete	488341	704970	43.9496
11	complete	488721	706985	44.8592
12	complete	488686	706585	51.1763
13	complete	488738	706175	48.9285
14	complete	488741	705770	50.615
15	complete	488743	705362	49.8129
16	complete	488753	704950	46.0984
17	complete	488745	704581	47.7762
18	complete	489150	706986	45.5912
19	complete	489114	706571	50.8118
20	complete	489130	706177	48.3945
21	complete	489131	705787	51.1994
22	complete	489143	705385	51.7713
23	complete	489166	704993	51.8622
24	complete	489144	704583	50.2036
25	complete	489559	706982	42.8462
26	complete	489544	706577	44.3751
27	complete	489545	706186	46.9772
28	complete	489548	705783	50.0022
29	complete	489539	705399	48.8583
30	complete	489559	704981	51.8937
31	complete	489536	704576	50.54
32	complete	489933	706563	43.5395
33	complete	489940	706188	49.4449
34	complete	489935	705775	49.4288
35	complete	489941	705372	48.9027
36	complete	489958	704980	50.1469
37	complete	489948	704587	51.9077
38	complete	489953	704182	48.7924
39	complete	490335	706581	43.3477
40	complete	490346	706176	49.9668
41	complete	490342	705780	50.0206
42	complete	490344	705377	52.858
43	complete	490352	704982	52.8834
44	complete	490352	704590	53.637
45	complete	490347	704179	51.4483
46	Poles_SLIC_L_proxy	487936	706167	44.1863
47	Poles_SLIC_L_proxy	488333	706979	44.7284
48	Poles_SLIC_L_proxy	487938	705379	48.582
49	Poles_SLIC_L_proxy	487941	705773	49.2196
50	Poles_SLIC_L_proxy	488339	706566	45.6716
51	Poles_SLIC_L_proxy	488345	705775	47.5741
52	Poles_SLIC_L_proxy	488745	704581	47.7762
53	Poles_SLIC_L_proxy	488686	706585	51.1763
54	Poles_SLIC_L_proxy	489143	705385	51.7713
55	Poles_SLIC_L_proxy	489131	705787	51.1994
56	Poles_SLIC_L_proxy	488721	706985	44.8592
57	Poles_SLIC_L_proxy	489150	706986	45.5912
58	Poles_SLIC_L_proxy	489130	706177	48.3945
59	Poles_SLIC_L_proxy	489114	706571	50.8118
60	Poles_SLIC_L_proxy	489545	706186	46.9772
61	Poles_SLIC_L_proxy	489536	704576	50.54
62	Poles_SLIC_L_proxy	489559	704981	51.8937
63	Poles_SLIC_L_proxy	489539	705399	48.8583
64	Poles_SLIC_L_proxy	489548	705783	50.0022
65	Poles_SLIC_L_proxy	489958	704980	50.1469
66	Poles_SLIC_L_proxy	490335	706581	43.3477
67	Poles_SLIC_L_proxy	489940	706188	49.4449
68	Poles_SLIC_L_proxy	489941	705372	48.9027
69	Poles_SLIC_L_proxy	490344	705377	52.858
70	Poles_SLIC_L_proxy	489948	704587	51.9077
71	Poles_SLIC_L_proxy	489933	706563	43.5395
72	Poles_SLIC_L_proxy	490346	706176	49.9668
73	Poles_SLIC_L_proxy	490347	704179	51.4483
74	Poles_SLIC_L_proxy	490352	704982	52.8834
75	Poles_SLIC_L_proxy	487936	706167	44.1863
76	Poles_SLIC_L_proxy	488333	706979	44.7284
77	Poles_SLIC_L_proxy	487938	705379	48.582
78	Poles_SLIC_L_proxy	487941	705773	49.2196
79	Poles_SLIC_L_proxy	488339	706566	45.6716
80	Poles_SLIC_L_proxy	488345	705775	47.5741
81	Poles_SLIC_L_proxy	488745	704581	47.7762
82	Poles_SLIC_L_proxy	488686	706585	51.1763
83	Poles_SLIC_L_proxy	488743	705362	49.8129
84	Poles_SLIC_L_proxy	489131	705787	51.1994
85	Poles_SLIC_L_proxy	488721	706985	44.8592
86	Poles_SLIC_L_proxy	489150	706986	45.5912
87	Poles_SLIC_L_proxy	489130	706177	48.3945
88	Poles_SLIC_L_proxy	489114	706571	50.8118
89	Poles_SLIC_L_proxy	489545	706186	46.9772
90	Poles_SLIC_L_proxy	489536	704576	50.54
91	Poles_SLIC_L_proxy	489559	704981	51.8937
92	Poles_SLIC_L_proxy	489539	705399	48.8583
93	Poles_SLIC_L_proxy	489548	705783	50.0022
94	Poles_SLIC_L_proxy	489958	704980	50.1469
95	Poles_SLIC_L_proxy	490335	706581	43.3477
96	Poles_SLIC_L_proxy	489940	706188	49.4449
97	Poles_SLIC_L_proxy	489941	705372	48.9027
98	Poles_SLIC_L_proxy	490344	705377	52.858
99	Poles_SLIC_L_proxy	489948	704587	51.9077
100	Poles_SLIC_L_proxy	489933	706563	43.5395
101	Poles_SLIC_L_proxy	490346	706176	49.9668
102	Poles_SLIC_L_proxy	490347	704179	51.4483
103	Poles_SLIC_L_proxy	490352	704982	52.8834
104	Poles_SLIC_L_proxy	487936	706167	44.1863
105	Poles_SLIC_L_proxy	487938	705379	48.582
106	Poles_SLIC_L_proxy	487941	705773	49.2196
107	Poles_SLIC_L_proxy	488339	706566	45.6716
108	Poles_SLIC_L_proxy	488345	705775	47.5741
109	Poles_SLIC_L_proxy	488745	704581	47.7762
110	Poles_SLIC_L_proxy	488686	706585	51.1763
111	Poles_SLIC_L_proxy	489143	705385	51.7713
112	Poles_SLIC_L_proxy	489131	705787	51.1994
113	Poles_SLIC_L_proxy	488721	706985	44.8592
114	Poles_SLIC_L_proxy	489150	706986	45.5912
115	Poles_SLIC_L_proxy	489130	706177	48.3945
116	Poles_SLIC_L_proxy	489114	706571	50.8118
117	Poles_SLIC_L_proxy	489545	706186	46.9772
118	Poles_SLIC_L_proxy	489144	704583	50.2036
119	Poles_SLIC_L_proxy	489559	704981	51.8937
120	Poles_SLIC_L_proxy	489539	705399	48.8583
121	Poles_SLIC_L_proxy	489548	705783	50.0022
122	Poles_SLIC_L_proxy	489958	704980	50.1469
123	Poles_SLIC_L_proxy	489940	706188	49.4449
124	Poles_SLIC_L_proxy	489941	705372	48.9027
125	Poles_SLIC_L_proxy	490344	705377	52.858
126	Poles_SLIC_L_proxy	489948	704587	51.9077
127	Poles_SLIC_L_proxy	489933	706563	43.5395
128	Poles_SLIC_L_proxy	490346	706176	49.9668
129	Poles_SLIC_L_proxy	490347	704179	51.4483
130	Poles_SLIC_L_proxy	490352	704982	52.8834
131	Poles_SLIC_L_proxy	487936	706167	44.1863
132	Poles_SLIC_L_proxy	488333	706979	44.7284
133	Poles_SLIC_L_proxy	487938	705379	48.582
134	Poles_SLIC_L_proxy	487941	705773	49.2196
135	Poles_SLIC_L_proxy	488339	706566	45.6716
136	Poles_SLIC_L_proxy	488345	705775	47.5741
137	Poles_SLIC_L_proxy	488745	704581	47.7762
138	Poles_SLIC_L_proxy	488686	706585	51.1763
139	Poles_SLIC_L_proxy	489143	705385	51.7713
140	Poles_SLIC_L_proxy	489131	705787	51.1994
141	Poles_SLIC_L_proxy	488721	706985	44.8592
142	Poles_SLIC_L_proxy	489150	706986	45.5912
143	Poles_SLIC_L_proxy	489130	706177	48.3945
144	Poles_SLIC_L_proxy	489114	706571	50.8118
145	Poles_SLIC_L_proxy	489545	706186	46.9772
146	Poles_SLIC_L_proxy	489536	704576	50.54
147	Poles_SLIC_L_proxy	489559	704981	51.8937
148	Poles_SLIC_L_proxy	489539	705399	48.8583
149	Poles_SLIC_L_proxy	489548	705783	50.0022
150	Poles_SLIC_L_proxy	489958	704980	50.1469
151	Poles_SLIC_L_proxy	490335	706581	43.3477
152	Poles_SLIC_L_proxy	489940	706188	49.4449
153	Poles_SLIC_L_proxy	489941	705372	48.9027
154	Poles_SLIC_L_proxy	490344	705377	52.858
155	Poles_SLIC_L_proxy	489948	704587	51.9077
156	Poles_SLIC_L_proxy	489933	706563	43.5395
157	Poles_SLIC_L_proxy	490346	706176	49.9668
158	Poles_SLIC_L_proxy	490347	704179	51.4483
159	Poles_SLIC_L_proxy	490352	704982	52.8834
160	Poles_SLIC_L_proxy	487936	706167	44.1863
161	Poles_SLIC_L_proxy	488333	706979	44.7284
162	Poles_SLIC_L_proxy	487938	705379	48.582
163	Poles_SLIC_L_proxy	487941	705773	49.2196
164	Poles_SLIC_L_proxy	488339	706566	45.6716
165	Poles_SLIC_L_proxy	488345	705775	47.5741
166	Poles_SLIC_L_proxy	488745	704581	47.7762
167	Poles_SLIC_L_proxy	488686	706585	51.1763
168	Poles_SLIC_L_proxy	488743	705362	49.8129
169	Poles_SLIC_L_proxy	489131	705787	51.1994
170	Poles_SLIC_L_proxy	488721	706985	44.8592
171	Poles_SLIC_L_proxy	489150	706986	45.5912
172	Poles_SLIC_L_proxy	489130	706177	48.3945
173	Poles_SLIC_L_proxy	489114	706571	50.8118
174	Poles_SLIC_L_proxy	489545	706186	46.9772
175	Poles_SLIC_L_proxy	489536	704576	50.54
176	Poles_SLIC_L_proxy	489559	704981	51.8937
177	Poles_SLIC_L_proxy	489539	705399	48.8583
178	Poles_SLIC_L_proxy	489548	705783	50.0022
179	Poles_SLIC_L_proxy	489958	704980	50.1469
180	Poles_SLIC_L_proxy	490335	706581	43.3477
181	Poles_SLIC_L_proxy	489940	706188	49.4449
182	Poles_SLIC_L_proxy	489941	705372	48.9027
183	Poles_SLIC_L_proxy	490344	705377	52.858
184	Poles_SLIC_L_proxy	489948	704587	51.9077
185	Poles_SLIC_L_proxy	489933	706563	43.5395
186	Poles_SLIC_L_proxy	490346	706176	49.9668
187	Poles_SLIC_L_proxy	490347	704179	51.4483
188	Poles_SLIC_L_proxy	490352	704982	52.8834
189	Poles_SLIC_L_proxy	487936	706167	44.1863
190	Poles_SLIC_L_proxy	487938	705379	48.582
191	Poles_SLIC_L_proxy	487941	705773	49.2196
192	Poles_SLIC_L_proxy	488339	706566	45.6716
193	Poles_SLIC_L_proxy	488345	705775	47.5741
194	Poles_SLIC_L_proxy	488745	704581	47.7762
195	Poles_SLIC_L_proxy	488686	706585	51.1763
196	Poles_SLIC_L_proxy	489143	705385	51.7713
197	Poles_SLIC_L_proxy	489131	705787	51.1994
198	Poles_SLIC_L_proxy	488721	706985	44.8592
199	Poles_SLIC_L_proxy	489150	706986	45.5912
200	Poles_SLIC_L_proxy	489130	706177	48.3945
201	Poles_SLIC_L_proxy	489114	706571	50.8118
202	Poles_SLIC_L_proxy	489545	706186	46.9772
203	Poles_SLIC_L_proxy	489144	704583	50.2036
204	Poles_SLIC_L_proxy	489559	704981	51.8937
205	Poles_SLIC_L_proxy	489539	705399	48.8583
206	Poles_SLIC_L_proxy	489548	705783	50.0022
207	Poles_SLIC_L_proxy	489958	704980	50.1469
208	Poles_SLIC_L_proxy	489940	706188	49.4449
209	Poles_SLIC_L_proxy	489941	705372	48.9027
210	Poles_SLIC_L_proxy	490344	705377	52.858
211	Poles_SLIC_L_proxy	489948	704587	51.9077
212	Poles_SLIC_L_proxy	489933	706563	43.5395
213	Poles_SLIC_L_proxy	490346	706176	49.9668
214	Poles_SLIC_L_proxy	490347	704179	51.4483
215	Poles_SLIC_L_proxy	490352	704982	52.8834
216	Poles_SLIC_L_proxy	487936	706167	44.1863
217	Poles_SLIC_L_proxy	488333	706979	44.7284
218	Poles_SLIC_L_proxy	487938	705379	48.582
219	Poles_SLIC_L_proxy	487941	705773	49.2196
220	Poles_SLIC_L_proxy	488339	706566	45.6716
221	Poles_SLIC_L_proxy	488345	705775	47.5741
222	Poles_SLIC_L_proxy	488745	704581	47.7762
223	Poles_SLIC_L_proxy	488686	706585	51.1763
224	Poles_SLIC_L_proxy	489143	705385	51.7713
225	Poles_SLIC_L_proxy	489131	705787	51.1994
226	Poles_SLIC_L_proxy	488721	706985	44.8592
227	Poles_SLIC_L_proxy	489150	706986	45.5912
228	Poles_SLIC_L_proxy	489130	706177	48.3945
229	Poles_SLIC_L_proxy	489114	706571	50.8118
230	Poles_SLIC_L_proxy	489545	706186	46.9772
231	Poles_SLIC_L_proxy	489536	704576	50.54
232	Poles_SLIC_L_proxy	489559	704981	51.8937
233	Poles_SLIC_L_proxy	489539	705399	48.8583
234	Poles_SLIC_L_proxy	489548	705783	50.0022
235	Poles_SLIC_L_proxy	489958	704980	50.1469
236	Poles_SLIC_L_proxy	490335	706581	43.3477
237	Poles_SLIC_L_proxy	489940	706188	49.4449
238	Poles_SLIC_L_proxy	489941	705372	48.9027
239	Poles_SLIC_L_proxy	490344	705377	52.858
240	Poles_SLIC_L_proxy	489948	704587	51.9077
241	Poles_SLIC_L_proxy	489933	706563	43.5395
242	Poles_SLIC_L_proxy	490346	706176	49.9668
243	Poles_SLIC_L_proxy	490347	704179	51.4483
244	Poles_SLIC_L_proxy	490352	704982	52.8834
245	Poles_SLIC_L_proxy	487936	706167	44.1863
246	Poles_SLIC_L_proxy	488333	706979	44.7284
247	Poles_SLIC_L_proxy	487938	705379	48.582
248	Poles_SLIC_L_proxy	487941	705773	49.2196
249	Poles_SLIC_L_proxy	488339	706566	45.6716
250	Poles_SLIC_L_proxy	488345	705775	47.5741
251	Poles_SLIC_L_proxy	488745	704581	47.7762
252	Poles_SLIC_L_proxy	488686	706585	51.1763
253	Poles_SLIC_L_proxy	488743	705362	49.8129
254	Poles_SLIC_L_proxy	489131	705787	51.1994
255	Poles_SLIC_L_proxy	488721	706985	44.8592
256	Poles_SLIC_L_proxy	489150	706986	45.5912
257	Poles_SLIC_L_proxy	489130	706177	48.3945
258	Poles_SLIC_L_proxy	489114	706571	50.8118
259	Poles_SLIC_L_proxy	489545	706186	46.9772
260	Poles_SLIC_L_proxy	489536	704576	50.54
261	Poles_SLIC_L_proxy	489559	704981	51.8937
262	Poles_SLIC_L_proxy	489539	705399	48.8583
263	Poles_SLIC_L_proxy	489548	705783	50.0022
264	Poles_SLIC_L_proxy	489958	704980	50.1469
265	Poles_SLIC_L_proxy	490335	706581	43.3477
266	Poles_SLIC_L_proxy	489940	706188	49.4449
267	Poles_SLIC_L_proxy	489941	705372	48.9027
268	Poles_SLIC_L_proxy	490344	705377	52.858
269	Poles_SLIC_L_proxy	489948	704587	51.9077
270	Poles_SLIC_L_proxy	489933	706563	43.5395
271	Poles_SLIC_L_proxy	490346	706176	49.9668
272	Poles_SLIC_L_proxy	490347	704179	51.4483
273	Poles_SLIC_L_proxy	490352	704982	52.8834
274	Poles_SLIC_L_proxy	487936	706167	44.1863
275	Poles_SLIC_L_proxy	487938	705379	48.582
276	Poles_SLIC_L_proxy	487941	705773	49.2196
277	Poles_SLIC_L_proxy	488339	706566	45.6716
278	Poles_SLIC_L_proxy	488345	705775	47.5741
279	Poles_SLIC_L_proxy	488745	704581	47.7762
280	Poles_SLIC_L_proxy	488686	706585	51.1763
281	Poles_SLIC_L_proxy	489143	705385	51.7713
282	Poles_SLIC_L_proxy	489131	705787	51.1994
283	Poles_SLIC_L_proxy	488721	706985	44.8592
284	Poles_SLIC_L_proxy	489150	706986	45.5912
285	Poles_SLIC_L_proxy	489130	706177	48.3945
286	Poles_SLIC_L_proxy	489114	706571	50.8118
287	Poles_SLIC_L_proxy	489545	706186	46.9772
288	Poles_SLIC_L_proxy	489144	704583	50.2036
289	Poles_SLIC_L_proxy	489559	704981	51.8937
290	Poles_SLIC_L_proxy	489539	705399	48.8583
291	Poles_SLIC_L_proxy	489548	705783	50.0022
292	Poles_SLIC_L_proxy	489958	704980	50.1469
293	Poles_SLIC_L_proxy	489940	706188	49.4449
294	Poles_SLIC_L_proxy	489941	705372	48.9027
295	Poles_SLIC_L_proxy	490344	705377	52.858
296	Poles_SLIC_L_proxy	489948	704587	51.9077
297	Poles_SLIC_L_proxy	489933	706563	43.5395
298	Poles_SLIC_L_proxy	490346	706176	49.9668
299	Poles_SLIC_L_proxy	490347	704179	51.4483
300	Poles_SLIC_L_proxy	490352	704982	52.8834
301	Poles_SLIC_L_proxy	487936	706167	44.1863
302	Poles_SLIC_L_proxy	488333	706979	44.7284
303	Poles_SLIC_L_proxy	487938	705379	48.582
304	Poles_SLIC_L_proxy	487941	705773	49.2196
305	Poles_SLIC_L_proxy	488339	706566	45.6716
306	Poles_SLIC_L_proxy	488345	705775	47.5741
307	Poles_SLIC_L_proxy	488745	704581	47.7762
308	Poles_SLIC_L_proxy	488686	706585	51.1763
309	Poles_SLIC_L_proxy	489143	705385	51.7713
310	Poles_SLIC_L_proxy	489131	705787	51.1994
311	Poles_SLIC_L_proxy	488721	706985	44.8592
312	Poles_SLIC_L_proxy	489150	706986	45.5912
313	Poles_SLIC_L_proxy	489130	706177	48.3945
314	Poles_SLIC_L_proxy	489114	706571	50.8118
315	Poles_SLIC_L_proxy	489545	706186	46.9772
316	Poles_SLIC_L_proxy	489536	704576	50.54
317	Poles_SLIC_L_proxy	489559	704981	51.8937
318	Poles_SLIC_L_proxy	489539	705399	48.8583
319	Poles_SLIC_L_proxy	489548	705783	50.0022
320	Poles_SLIC_L_proxy	489958	704980	50.1469
321	Poles_SLIC_L_proxy	490335	706581	43.3477
322	Poles_SLIC_L_proxy	489940	706188	49.4449
323	Poles_SLIC_L_proxy	489941	705372	48.9027
324	Poles_SLIC_L_proxy	490344	705377	52.858
325	Poles_SLIC_L_proxy	489948	704587	51.9077
326	Poles_SLIC_L_proxy	489933	706563	43.5395
327	Poles_SLIC_L_proxy	490346	706176	49.9668
328	Poles_SLIC_L_proxy	490347	704179	51.4483
329	Poles_SLIC_L_proxy	490352	704982	52.8834
330	Poles_SLIC_L_proxy	487936	706167	44.1863
331	Poles_SLIC_L_proxy	488333	706979	44.7284
332	Poles_SLIC_L_proxy	487938	705379	48.582
333	Poles_SLIC_L_proxy	487941	705773	49.2196
334	Poles_SLIC_L_proxy	488339	706566	45.6716
335	Poles_SLIC_L_proxy	488345	705775	47.5741
336	Poles_SLIC_L_proxy	488745	704581	47.7762
337	Poles_SLIC_L_proxy	488686	706585	51.1763
338	Poles_SLIC_L_proxy	488743	705362	49.8129
339	Poles_SLIC_L_proxy	489131	705787	51.1994
340	Poles_SLIC_L_proxy	488721	706985	44.8592
341	Poles_SLIC_L_proxy	489150	706986	45.5912
342	Poles_SLIC_L_proxy	489130	706177	48.3945
343	Poles_SLIC_L_proxy	489114	706571	50.8118
344	Poles_SLIC_L_proxy	489545	706186	46.9772
345	Poles_SLIC_L_proxy	489536	704576	50.54
346	Poles_SLIC_L_proxy	489559	704981	51.8937
347	Poles_SLIC_L_proxy	489539	705399	48.8583
348	Poles_SLIC_L_proxy	489548	705783	50.0022
349	Poles_SLIC_L_proxy	489958	704980	50.1469
350	Poles_SLIC_L_proxy	490335	706581	43.3477
351	Poles_SLIC_L_proxy	489940	706188	49.4449
352	Poles_SLIC_L_proxy	489941	705372	48.9027
353	Poles_SLIC_L_proxy	490344	705377	52.858
354	Poles_SLIC_L_proxy	489948	704587	51.9077
355	Poles_SLIC_L_proxy	489933	706563	43.5395
356	Poles_SLIC_L_proxy	490346	706176	49.9668
357	Poles_SLIC_L_proxy	490347	704179	51.4483
358	Poles_SLIC_L_proxy	490352	704982	52.8834
359	Poles_SLIC_L_proxy	487936	706167	44.1863
360	Poles_SLIC_L_proxy	487938	705379	48.582
361	Poles_SLIC_L_proxy	487941	705773	49.2196
362	Poles_SLIC_L_proxy	488339	706566	45.6716
363	Poles_SLIC_L_proxy	488345	705775	47.5741
364	Poles_SLIC_L_proxy	488745	704581	47.7762
365	Poles_SLIC_L_proxy	488686	706585	51.1763
366	Poles_SLIC_L_proxy	489143	705385	51.7713
367	Poles_SLIC_L_proxy	489131	705787	51.1994
368	Poles_SLIC_L_proxy	488721	706985	44.8592
369	Poles_SLIC_L_proxy	489150	706986	45.5912
370	Poles_SLIC_L_proxy	489130	706177	48.3945
371	Poles_SLIC_L_proxy	489114	706571	50.8118
372	Poles_SLIC_L_proxy	489545	706186	46.9772
373	Poles_SLIC_L_proxy	489144	704583	50.2036
374	Poles_SLIC_L_proxy	489559	704981	51.8937
375	Poles_SLIC_L_proxy	489539	705399	48.8583
376	Poles_SLIC_L_proxy	489548	705783	50.0022
377	Poles_SLIC_L_proxy	489958	704980	50.1469
378	Poles_SLIC_L_proxy	489940	706188	49.4449
379	Poles_SLIC_L_proxy	489941	705372	48.9027
380	Poles_SLIC_L_proxy	490344	705377	52.858
381	Poles_SLIC_L_proxy	489948	704587	51.9077
382	Poles_SLIC_L_proxy	489933	706563	43.5395
383	Poles_SLIC_L_proxy	490346	706176	49.9668
384	Poles_SLIC_L_proxy	490347	704179	51.4483
385	Poles_SLIC_L_proxy	490352	704982	52.8834
386	Poles_Landcover_L_proxy	488686	706585	51.1763
387	Poles_Landcover_L_proxy	490346	706176	49.9668
388	Poles_Landcover_L_proxy	488738	706175	48.9285
389	Poles_Landcover_L_proxy	489130	706177	48.3945
390	Poles_Landcover_L_proxy	489933	706563	43.5395
391	Poles_Landcover_L_proxy	488345	705775	47.5741
392	Poles_Landcover_L_proxy	488339	706566	45.6716
393	Poles_Landcover_L_proxy	489940	706188	49.4449
394	Poles_Landcover_L_proxy	490342	705780	50.0206
395	Poles_Landcover_L_proxy	489143	705385	51.7713
396	Poles_Landcover_L_proxy	488743	705362	49.8129
397	Poles_Landcover_L_proxy	487936	706167	44.1863
398	Poles_Landcover_L_proxy	489539	705399	48.8583
399	Poles_Landcover_L_proxy	488741	705770	50.615
400	Poles_Landcover_L_proxy	487938	705379	48.582
401	Poles_Landcover_L_proxy	489948	704587	51.9077
402	Poles_Landcover_L_proxy	488745	704581	47.7762
403	Poles_Landcover_L_proxy	488341	704970	43.9496
404	Poles_Landcover_L_proxy	490352	704982	52.8834
405	Poles_Landcover_L_proxy	489953	704182	48.7924
406	Poles_Landcover_L_proxy	490347	704179	51.4483
407	Poles_Landcover_L_proxy	488333	706979	44.7284
408	Poles_Landcover_L_proxy	490335	706581	43.3477
409	Poles_Landcover_L_proxy	488686	706585	51.1763
410	Poles_Landcover_L_proxy	490346	706176	49.9668
411	Poles_Landcover_L_proxy	488738	706175	48.9285
412	Poles_Landcover_L_proxy	489130	706177	48.3945
413	Poles_Landcover_L_proxy	489933	706563	43.5395
414	Poles_Landcover_L_proxy	488345	705775	47.5741
415	Poles_Landcover_L_proxy	488339	706566	45.6716
416	Poles_Landcover_L_proxy	489940	706188	49.4449
417	Poles_Landcover_L_proxy	490342	705780	50.0206
418	Poles_Landcover_L_proxy	489143	705385	51.7713
419	Poles_Landcover_L_proxy	488743	705362	49.8129
420	Poles_Landcover_L_proxy	487936	706167	44.1863
421	Poles_Landcover_L_proxy	489539	705399	48.8583
422	Poles_Landcover_L_proxy	488741	705770	50.615
423	Poles_Landcover_L_proxy	487938	705379	48.582
424	Poles_Landcover_L_proxy	489948	704587	51.9077
425	Poles_Landcover_L_proxy	488745	704581	47.7762
426	Poles_Landcover_L_proxy	488341	704970	43.9496
427	Poles_Landcover_L_proxy	490352	704982	52.8834
428	Poles_Landcover_L_proxy	489953	704182	48.7924
429	Poles_Landcover_L_proxy	490347	704179	51.4483
430	Poles_Landcover_L_proxy	488333	706979	44.7284
431	Poles_Landcover_L_proxy	490335	706581	43.3477
432	Poles_Landcover_L_proxy	488686	706585	51.1763
433	Poles_Landcover_L_proxy	490346	706176	49.9668
434	Poles_Landcover_L_proxy	488738	706175	48.9285
435	Poles_Landcover_L_proxy	489130	706177	48.3945
436	Poles_Landcover_L_proxy	489933	706563	43.5395
437	Poles_Landcover_L_proxy	488345	705775	47.5741
438	Poles_Landcover_L_proxy	488339	706566	45.6716
439	Poles_Landcover_L_proxy	489940	706188	49.4449
440	Poles_Landcover_L_proxy	490342	705780	50.0206
441	Poles_Landcover_L_proxy	488743	705362	49.8129
442	Poles_Landcover_L_proxy	487936	706167	44.1863
443	Poles_Landcover_L_proxy	489539	705399	48.8583
444	Poles_Landcover_L_proxy	488741	705770	50.615
445	Poles_Landcover_L_proxy	487938	705379	48.582
446	Poles_Landcover_L_proxy	489948	704587	51.9077
447	Poles_Landcover_L_proxy	488745	704581	47.7762
448	Poles_Landcover_L_proxy	488341	704970	43.9496
449	Poles_Landcover_L_proxy	490352	704982	52.8834
450	Poles_Landcover_L_proxy	489953	704182	48.7924
451	Poles_Landcover_L_proxy	490347	704179	51.4483
452	Poles_Landcover_L_proxy	488686	706585	51.1763
453	Poles_Landcover_L_proxy	490346	706176	49.9668
454	Poles_Landcover_L_proxy	488738	706175	48.9285
455	Poles_Landcover_L_proxy	489130	706177	48.3945
456	Poles_Landcover_L_proxy	489933	706563	43.5395
457	Poles_Landcover_L_proxy	488345	705775	47.5741
458	Poles_Landcover_L_proxy	488339	706566	45.6716
459	Poles_Landcover_L_proxy	489940	706188	49.4449
460	Poles_Landcover_L_proxy	490342	705780	50.0206
461	Poles_Landcover_L_proxy	489143	705385	51.7713
462	Poles_Landcover_L_proxy	488743	705362	49.8129
463	Poles_Landcover_L_proxy	487936	706167	44.1863
464	Poles_Landcover_L_proxy	489539	705399	48.8583
465	Poles_Landcover_L_proxy	488741	705770	50.615
466	Poles_Landcover_L_proxy	487938	705379	48.582
467	Poles_Landcover_L_proxy	489948	704587	51.9077
468	Poles_Landcover_L_proxy	488745	704581	47.7762
469	Poles_Landcover_L_proxy	488341	704970	43.9496
470	Poles_Landcover_L_proxy	490352	704982	52.8834
471	Poles_Landcover_L_proxy	489953	704182	48.7924
472	Poles_Landcover_L_proxy	490347	704179	51.4483
473	Poles_Landcover_L_proxy	488333	706979	44.7284
474	Poles_Landcover_L_proxy	490335	706581	43.3477
475	Poles_Landcover_L_proxy	488686	706585	51.1763
476	Poles_Landcover_L_proxy	490346	706176	49.9668
477	Poles_Landcover_L_proxy	488738	706175	48.9285
478	Poles_Landcover_L_proxy	489130	706177	48.3945
479	Poles_Landcover_L_proxy	489933	706563	43.5395
480	Poles_Landcover_L_proxy	488345	705775	47.5741
481	Poles_Landcover_L_proxy	488339	706566	45.6716
482	Poles_Landcover_L_proxy	489940	706188	49.4449
483	Poles_Landcover_L_proxy	490342	705780	50.0206
484	Poles_Landcover_L_proxy	488743	705362	49.8129
485	Poles_Landcover_L_proxy	487936	706167	44.1863
486	Poles_Landcover_L_proxy	489539	705399	48.8583
487	Poles_Landcover_L_proxy	488741	705770	50.615
488	Poles_Landcover_L_proxy	487938	705379	48.582
489	Poles_Landcover_L_proxy	489948	704587	51.9077
490	Poles_Landcover_L_proxy	488745	704581	47.7762
491	Poles_Landcover_L_proxy	488341	704970	43.9496
492	Poles_Landcover_L_proxy	490352	704982	52.8834
493	Poles_Landcover_L_proxy	489953	704182	48.7924
494	Poles_Landcover_L_proxy	490347	704179	51.4483
495	Poles_Landcover_L_proxy	488333	706979	44.7284
496	Poles_Landcover_L_proxy	490335	706581	43.3477
497	Poles_Landcover_L_proxy	488686	706585	51.1763
498	Poles_Landcover_L_proxy	490346	706176	49.9668
499	Poles_Landcover_L_proxy	488738	706175	48.9285
500	Poles_Landcover_L_proxy	489130	706177	48.3945
501	Poles_Landcover_L_proxy	489933	706563	43.5395
502	Poles_Landcover_L_proxy	488345	705775	47.5741
503	Poles_Landcover_L_proxy	488339	706566	45.6716
504	Poles_Landcover_L_proxy	489940	706188	49.4449
505	Poles_Landcover_L_proxy	490342	705780	50.0206
506	Poles_Landcover_L_proxy	489143	705385	51.7713
507	Poles_Landcover_L_proxy	488743	705362	49.8129
508	Poles_Landcover_L_proxy	487936	706167	44.1863
509	Poles_Landcover_L_proxy	489539	705399	48.8583
510	Poles_Landcover_L_proxy	488741	705770	50.615
511	Poles_Landcover_L_proxy	487938	705379	48.582
512	Poles_Landcover_L_proxy	489948	704587	51.9077
513	Poles_Landcover_L_proxy	488745	704581	47.7762
514	Poles_Landcover_L_proxy	488341	704970	43.9496
515	Poles_Landcover_L_proxy	490352	704982	52.8834
516	Poles_Landcover_L_proxy	489953	704182	48.7924
517	Poles_Landcover_L_proxy	490347	704179	51.4483
518	Poles_Landcover_L_proxy	488686	706585	51.1763
519	Poles_Landcover_L_proxy	490346	706176	49.9668
520	Poles_Landcover_L_proxy	488738	706175	48.9285
521	Poles_Landcover_L_proxy	489130	706177	48.3945
522	Poles_Landcover_L_proxy	489933	706563	43.5395
523	Poles_Landcover_L_proxy	488345	705775	47.5741
524	Poles_Landcover_L_proxy	488339	706566	45.6716
525	Poles_Landcover_L_proxy	489940	706188	49.4449
526	Poles_Landcover_L_proxy	490342	705780	50.0206
527	Poles_Landcover_L_proxy	489143	705385	51.7713
528	Poles_Landcover_L_proxy	488743	705362	49.8129
529	Poles_Landcover_L_proxy	487936	706167	44.1863
530	Poles_Landcover_L_proxy	489539	705399	48.8583
531	Poles_Landcover_L_proxy	488741	705770	50.615
532	Poles_Landcover_L_proxy	487938	705379	48.582
533	Poles_Landcover_L_proxy	489948	704587	51.9077
534	Poles_Landcover_L_proxy	488745	704581	47.7762
535	Poles_Landcover_L_proxy	488341	704970	43.9496
536	Poles_Landcover_L_proxy	490352	704982	52.8834
537	Poles_Landcover_L_proxy	489953	704182	48.7924
538	Poles_Landcover_L_proxy	490347	704179	51.4483
539	Poles_Landcover_L_proxy	488333	706979	44.7284
540	Poles_Landcover_L_proxy	490335	706581	43.3477
541	Poles_Landcover_L_proxy	488686	706585	51.1763
542	Poles_Landcover_L_proxy	490346	706176	49.9668
543	Poles_Landcover_L_proxy	488738	706175	48.9285
544	Poles_Landcover_L_proxy	489130	706177	48.3945
545	Poles_Landcover_L_proxy	489933	706563	43.5395
546	Poles_Landcover_L_proxy	488345	705775	47.5741
547	Poles_Landcover_L_proxy	488339	706566	45.6716
548	Poles_Landcover_L_proxy	489940	706188	49.4449
549	Poles_Landcover_L_proxy	490342	705780	50.0206
550	Poles_Landcover_L_proxy	489143	705385	51.7713
551	Poles_Landcover_L_proxy	488743	705362	49.8129
552	Poles_Landcover_L_proxy	487936	706167	44.1863
553	Poles_Landcover_L_proxy	489539	705399	48.8583
554	Poles_Landcover_L_proxy	488741	705770	50.615
555	Poles_Landcover_L_proxy	487938	705379	48.582
556	Poles_Landcover_L_proxy	489948	704587	51.9077
557	Poles_Landcover_L_proxy	488745	704581	47.7762
558	Poles_Landcover_L_proxy	488341	704970	43.9496
559	Poles_Landcover_L_proxy	490352	704982	52.8834
560	Poles_Landcover_L_proxy	489953	704182	48.7924
561	Poles_Landcover_L_proxy	490347	704179	51.4483
562	Poles_Landcover_L_proxy	488333	706979	44.7284
563	Poles_Landcover_L_proxy	490335	706581	43.3477
564	Poles_Landcover_L_proxy	488686	706585	51.1763
565	Poles_Landcover_L_proxy	490346	706176	49.9668
566	Poles_Landcover_L_proxy	488738	706175	48.9285
567	Poles_Landcover_L_proxy	489130	706177	48.3945
568	Poles_Landcover_L_proxy	489933	706563	43.5395
569	Poles_Landcover_L_proxy	488345	705775	47.5741
570	Poles_Landcover_L_proxy	488339	706566	45.6716
571	Poles_Landcover_L_proxy	489940	706188	49.4449
572	Poles_Landcover_L_proxy	490342	705780	50.0206
573	Poles_Landcover_L_proxy	488743	705362	49.8129
574	Poles_Landcover_L_proxy	487936	706167	44.1863
575	Poles_Landcover_L_proxy	489539	705399	48.8583
576	Poles_Landcover_L_proxy	488741	705770	50.615
577	Poles_Landcover_L_proxy	487938	705379	48.582
578	Poles_Landcover_L_proxy	489948	704587	51.9077
579	Poles_Landcover_L_proxy	488745	704581	47.7762
580	Poles_Landcover_L_proxy	488341	704970	43.9496
581	Poles_Landcover_L_proxy	490352	704982	52.8834
582	Poles_Landcover_L_proxy	489953	704182	48.7924
583	Poles_Landcover_L_proxy	490347	704179	51.4483
584	Poles_Landcover_L_proxy	488686	706585	51.1763
585	Poles_Landcover_L_proxy	490346	706176	49.9668
586	Poles_Landcover_L_proxy	488738	706175	48.9285
587	Poles_Landcover_L_proxy	489130	706177	48.3945
588	Poles_Landcover_L_proxy	489933	706563	43.5395
589	Poles_Landcover_L_proxy	488345	705775	47.5741
590	Poles_Landcover_L_proxy	488339	706566	45.6716
591	Poles_Landcover_L_proxy	489940	706188	49.4449
592	Poles_Landcover_L_proxy	490342	705780	50.0206
593	Poles_Landcover_L_proxy	489143	705385	51.7713
594	Poles_Landcover_L_proxy	488743	705362	49.8129
595	Poles_Landcover_L_proxy	487936	706167	44.1863
596	Poles_Landcover_L_proxy	489539	705399	48.8583
597	Poles_Landcover_L_proxy	488741	705770	50.615
598	Poles_Landcover_L_proxy	487938	705379	48.582
599	Poles_Landcover_L_proxy	489948	704587	51.9077
600	Poles_Landcover_L_proxy	488745	704581	47.7762
601	Poles_Landcover_L_proxy	488341	704970	43.9496
602	Poles_Landcover_L_proxy	490352	704982	52.8834
603	Poles_Landcover_L_proxy	489953	704182	48.7924
604	Poles_Landcover_L_proxy	490347	704179	51.4483
605	Poles_Landcover_L_proxy	488333	706979	44.7284
606	Poles_Landcover_L_proxy	490335	706581	43.3477
607	Poles_Landcover_L_proxy	488686	706585	51.1763
608	Poles_Landcover_L_proxy	490346	706176	49.9668
609	Poles_Landcover_L_proxy	488738	706175	48.9285
610	Poles_Landcover_L_proxy	489130	706177	48.3945
611	Poles_Landcover_L_proxy	489933	706563	43.5395
612	Poles_Landcover_L_proxy	488345	705775	47.5741
613	Poles_Landcover_L_proxy	488339	706566	45.6716
614	Poles_Landcover_L_proxy	489940	706188	49.4449
615	Poles_Landcover_L_proxy	490342	705780	50.0206
616	Poles_Landcover_L_proxy	489143	705385	51.7713
617	Poles_Landcover_L_proxy	488743	705362	49.8129
618	Poles_Landcover_L_proxy	487936	706167	44.1863
619	Poles_Landcover_L_proxy	489539	705399	48.8583
620	Poles_Landcover_L_proxy	488741	705770	50.615
621	Poles_Landcover_L_proxy	487938	705379	48.582
622	Poles_Landcover_L_proxy	489948	704587	51.9077
623	Poles_Landcover_L_proxy	488745	704581	47.7762
624	Poles_Landcover_L_proxy	488341	704970	43.9496
625	Poles_Landcover_L_proxy	490352	704982	52.8834
626	Poles_Landcover_L_proxy	489953	704182	48.7924
627	Poles_Landcover_L_proxy	490347	704179	51.4483
628	Poles_Landcover_L_proxy	488333	706979	44.7284
629	Poles_Landcover_L_proxy	490335	706581	43.3477
630	Poles_Landcover_L_proxy	488686	706585	51.1763
631	Poles_Landcover_L_proxy	490346	706176	49.9668
632	Poles_Landcover_L_proxy	488738	706175	48.9285
633	Poles_Landcover_L_proxy	489130	706177	48.3945
634	Poles_Landcover_L_proxy	489933	706563	43.5395
635	Poles_Landcover_L_proxy	488345	705775	47.5741
636	Poles_Landcover_L_proxy	488339	706566	45.6716
637	Poles_Landcover_L_proxy	489940	706188	49.4449
638	Poles_Landcover_L_proxy	490342	705780	50.0206
639	Poles_Landcover_L_proxy	488743	705362	49.8129
640	Poles_Landcover_L_proxy	487936	706167	44.1863
641	Poles_Landcover_L_proxy	489539	705399	48.8583
642	Poles_Landcover_L_proxy	488741	705770	50.615
643	Poles_Landcover_L_proxy	487938	705379	48.582
644	Poles_Landcover_L_proxy	489948	704587	51.9077
645	Poles_Landcover_L_proxy	488745	704581	47.7762
646	Poles_Landcover_L_proxy	488341	704970	43.9496
647	Poles_Landcover_L_proxy	490352	704982	52.8834
648	Poles_Landcover_L_proxy	489953	704182	48.7924
649	Poles_Landcover_L_proxy	490347	704179	51.4483
650	Poles_halfbasins_L_proxy	488721	706985	44.8592
651	Poles_halfbasins_L_proxy	489150	706986	45.5912
652	Poles_halfbasins_L_proxy	488339	706566	45.6716
653	Poles_halfbasins_L_proxy	488686	706585	51.1763
654	Poles_halfbasins_L_proxy	488738	706175	48.9285
655	Poles_halfbasins_L_proxy	488341	706169	43.7833
656	Poles_halfbasins_L_proxy	489940	706188	49.4449
657	Poles_halfbasins_L_proxy	489545	706186	46.9772
658	Poles_halfbasins_L_proxy	489131	705787	51.1994
659	Poles_halfbasins_L_proxy	487936	706167	44.1863
660	Poles_halfbasins_L_proxy	488345	705775	47.5741
661	Poles_halfbasins_L_proxy	489130	706177	48.3945
662	Poles_halfbasins_L_proxy	489935	705775	49.4288
663	Poles_halfbasins_L_proxy	487941	705773	49.2196
664	Poles_halfbasins_L_proxy	490342	705780	50.0206
665	Poles_halfbasins_L_proxy	488273	705422	50.5928
666	Poles_halfbasins_L_proxy	487938	705379	48.582
667	Poles_halfbasins_L_proxy	489143	705385	51.7713
668	Poles_halfbasins_L_proxy	488341	704970	43.9496
669	Poles_halfbasins_L_proxy	489166	704993	51.8622
670	Poles_halfbasins_L_proxy	488753	704950	46.0984
671	Poles_halfbasins_L_proxy	489941	705372	48.9027
672	Poles_halfbasins_L_proxy	489559	704981	51.8937
673	Poles_halfbasins_L_proxy	489948	704587	51.9077
674	Poles_halfbasins_L_proxy	488745	704581	47.7762
675	Poles_halfbasins_L_proxy	490347	704179	51.4483
676	Poles_halfbasins_L_proxy	489144	704583	50.2036
677	Poles_halfbasins_L_proxy	489953	704182	48.7924
678	Poles_halfbasins_L_proxy	488721	706985	44.8592
679	Poles_halfbasins_L_proxy	489150	706986	45.5912
680	Poles_halfbasins_L_proxy	488333	706979	44.7284
681	Poles_halfbasins_L_proxy	488686	706585	51.1763
682	Poles_halfbasins_L_proxy	490335	706581	43.3477
683	Poles_halfbasins_L_proxy	488738	706175	48.9285
684	Poles_halfbasins_L_proxy	488341	706169	43.7833
685	Poles_halfbasins_L_proxy	489940	706188	49.4449
686	Poles_halfbasins_L_proxy	489545	706186	46.9772
687	Poles_halfbasins_L_proxy	489131	705787	51.1994
688	Poles_halfbasins_L_proxy	487936	706167	44.1863
689	Poles_halfbasins_L_proxy	488345	705775	47.5741
690	Poles_halfbasins_L_proxy	489130	706177	48.3945
691	Poles_halfbasins_L_proxy	489935	705775	49.4288
692	Poles_halfbasins_L_proxy	487941	705773	49.2196
693	Poles_halfbasins_L_proxy	490342	705780	50.0206
694	Poles_halfbasins_L_proxy	488273	705422	50.5928
695	Poles_halfbasins_L_proxy	487938	705379	48.582
696	Poles_halfbasins_L_proxy	489143	705385	51.7713
697	Poles_halfbasins_L_proxy	488341	704970	43.9496
698	Poles_halfbasins_L_proxy	489166	704993	51.8622
699	Poles_halfbasins_L_proxy	488753	704950	46.0984
700	Poles_halfbasins_L_proxy	489941	705372	48.9027
701	Poles_halfbasins_L_proxy	489559	704981	51.8937
702	Poles_halfbasins_L_proxy	489536	704576	50.54
703	Poles_halfbasins_L_proxy	488745	704581	47.7762
704	Poles_halfbasins_L_proxy	490347	704179	51.4483
705	Poles_halfbasins_L_proxy	489144	704583	50.2036
706	Poles_halfbasins_L_proxy	489953	704182	48.7924
707	Poles_halfbasins_L_proxy	488721	706985	44.8592
708	Poles_halfbasins_L_proxy	489150	706986	45.5912
709	Poles_halfbasins_L_proxy	488333	706979	44.7284
710	Poles_halfbasins_L_proxy	488686	706585	51.1763
711	Poles_halfbasins_L_proxy	490335	706581	43.3477
712	Poles_halfbasins_L_proxy	488738	706175	48.9285
713	Poles_halfbasins_L_proxy	488341	706169	43.7833
714	Poles_halfbasins_L_proxy	489940	706188	49.4449
715	Poles_halfbasins_L_proxy	489545	706186	46.9772
716	Poles_halfbasins_L_proxy	489131	705787	51.1994
717	Poles_halfbasins_L_proxy	487936	706167	44.1863
718	Poles_halfbasins_L_proxy	488345	705775	47.5741
719	Poles_halfbasins_L_proxy	489130	706177	48.3945
720	Poles_halfbasins_L_proxy	489935	705775	49.4288
721	Poles_halfbasins_L_proxy	487941	705773	49.2196
722	Poles_halfbasins_L_proxy	490342	705780	50.0206
723	Poles_halfbasins_L_proxy	488273	705422	50.5928
724	Poles_halfbasins_L_proxy	487938	705379	48.582
725	Poles_halfbasins_L_proxy	488743	705362	49.8129
726	Poles_halfbasins_L_proxy	488341	704970	43.9496
727	Poles_halfbasins_L_proxy	488753	704950	46.0984
728	Poles_halfbasins_L_proxy	489941	705372	48.9027
729	Poles_halfbasins_L_proxy	489559	704981	51.8937
730	Poles_halfbasins_L_proxy	489536	704576	50.54
731	Poles_halfbasins_L_proxy	488745	704581	47.7762
732	Poles_halfbasins_L_proxy	490347	704179	51.4483
733	Poles_halfbasins_L_proxy	489144	704583	50.2036
734	Poles_halfbasins_L_proxy	489953	704182	48.7924
735	Poles_halfbasins_L_proxy	488721	706985	44.8592
736	Poles_halfbasins_L_proxy	489150	706986	45.5912
737	Poles_halfbasins_L_proxy	488339	706566	45.6716
738	Poles_halfbasins_L_proxy	488686	706585	51.1763
739	Poles_halfbasins_L_proxy	488738	706175	48.9285
740	Poles_halfbasins_L_proxy	488341	706169	43.7833
741	Poles_halfbasins_L_proxy	489940	706188	49.4449
742	Poles_halfbasins_L_proxy	489545	706186	46.9772
743	Poles_halfbasins_L_proxy	489131	705787	51.1994
744	Poles_halfbasins_L_proxy	487936	706167	44.1863
745	Poles_halfbasins_L_proxy	488345	705775	47.5741
746	Poles_halfbasins_L_proxy	489130	706177	48.3945
747	Poles_halfbasins_L_proxy	489935	705775	49.4288
748	Poles_halfbasins_L_proxy	487941	705773	49.2196
749	Poles_halfbasins_L_proxy	490342	705780	50.0206
750	Poles_halfbasins_L_proxy	488273	705422	50.5928
751	Poles_halfbasins_L_proxy	487938	705379	48.582
752	Poles_halfbasins_L_proxy	489143	705385	51.7713
753	Poles_halfbasins_L_proxy	488341	704970	43.9496
754	Poles_halfbasins_L_proxy	489166	704993	51.8622
755	Poles_halfbasins_L_proxy	488753	704950	46.0984
756	Poles_halfbasins_L_proxy	489941	705372	48.9027
757	Poles_halfbasins_L_proxy	489559	704981	51.8937
758	Poles_halfbasins_L_proxy	489948	704587	51.9077
759	Poles_halfbasins_L_proxy	488745	704581	47.7762
760	Poles_halfbasins_L_proxy	490347	704179	51.4483
761	Poles_halfbasins_L_proxy	489144	704583	50.2036
762	Poles_halfbasins_L_proxy	489953	704182	48.7924
763	Poles_halfbasins_L_proxy	488721	706985	44.8592
764	Poles_halfbasins_L_proxy	489150	706986	45.5912
765	Poles_halfbasins_L_proxy	488333	706979	44.7284
766	Poles_halfbasins_L_proxy	488686	706585	51.1763
767	Poles_halfbasins_L_proxy	490335	706581	43.3477
768	Poles_halfbasins_L_proxy	488738	706175	48.9285
769	Poles_halfbasins_L_proxy	488341	706169	43.7833
770	Poles_halfbasins_L_proxy	489940	706188	49.4449
771	Poles_halfbasins_L_proxy	489545	706186	46.9772
772	Poles_halfbasins_L_proxy	489131	705787	51.1994
773	Poles_halfbasins_L_proxy	487936	706167	44.1863
774	Poles_halfbasins_L_proxy	488345	705775	47.5741
775	Poles_halfbasins_L_proxy	489130	706177	48.3945
776	Poles_halfbasins_L_proxy	489935	705775	49.4288
777	Poles_halfbasins_L_proxy	487941	705773	49.2196
778	Poles_halfbasins_L_proxy	490342	705780	50.0206
779	Poles_halfbasins_L_proxy	488273	705422	50.5928
780	Poles_halfbasins_L_proxy	487938	705379	48.582
781	Poles_halfbasins_L_proxy	489143	705385	51.7713
782	Poles_halfbasins_L_proxy	488341	704970	43.9496
783	Poles_halfbasins_L_proxy	489166	704993	51.8622
784	Poles_halfbasins_L_proxy	488753	704950	46.0984
785	Poles_halfbasins_L_proxy	489941	705372	48.9027
786	Poles_halfbasins_L_proxy	489559	704981	51.8937
787	Poles_halfbasins_L_proxy	489536	704576	50.54
788	Poles_halfbasins_L_proxy	488745	704581	47.7762
789	Poles_halfbasins_L_proxy	490347	704179	51.4483
790	Poles_halfbasins_L_proxy	489144	704583	50.2036
791	Poles_halfbasins_L_proxy	489953	704182	48.7924
792	Poles_halfbasins_L_proxy	488721	706985	44.8592
793	Poles_halfbasins_L_proxy	489150	706986	45.5912
794	Poles_halfbasins_L_proxy	488333	706979	44.7284
795	Poles_halfbasins_L_proxy	488686	706585	51.1763
796	Poles_halfbasins_L_proxy	490335	706581	43.3477
797	Poles_halfbasins_L_proxy	488738	706175	48.9285
798	Poles_halfbasins_L_proxy	488341	706169	43.7833
799	Poles_halfbasins_L_proxy	489940	706188	49.4449
800	Poles_halfbasins_L_proxy	489545	706186	46.9772
801	Poles_halfbasins_L_proxy	489131	705787	51.1994
802	Poles_halfbasins_L_proxy	487936	706167	44.1863
803	Poles_halfbasins_L_proxy	488345	705775	47.5741
804	Poles_halfbasins_L_proxy	489130	706177	48.3945
805	Poles_halfbasins_L_proxy	489935	705775	49.4288
806	Poles_halfbasins_L_proxy	487941	705773	49.2196
807	Poles_halfbasins_L_proxy	490342	705780	50.0206
808	Poles_halfbasins_L_proxy	488273	705422	50.5928
809	Poles_halfbasins_L_proxy	487938	705379	48.582
810	Poles_halfbasins_L_proxy	488743	705362	49.8129
811	Poles_halfbasins_L_proxy	488341	704970	43.9496
812	Poles_halfbasins_L_proxy	488753	704950	46.0984
813	Poles_halfbasins_L_proxy	489941	705372	48.9027
814	Poles_halfbasins_L_proxy	489559	704981	51.8937
815	Poles_halfbasins_L_proxy	489536	704576	50.54
816	Poles_halfbasins_L_proxy	488745	704581	47.7762
817	Poles_halfbasins_L_proxy	490347	704179	51.4483
818	Poles_halfbasins_L_proxy	489144	704583	50.2036
819	Poles_halfbasins_L_proxy	489953	704182	48.7924
820	Poles_halfbasins_L_proxy	488721	706985	44.8592
821	Poles_halfbasins_L_proxy	489150	706986	45.5912
822	Poles_halfbasins_L_proxy	488339	706566	45.6716
823	Poles_halfbasins_L_proxy	488686	706585	51.1763
824	Poles_halfbasins_L_proxy	488738	706175	48.9285
825	Poles_halfbasins_L_proxy	488341	706169	43.7833
826	Poles_halfbasins_L_proxy	489940	706188	49.4449
827	Poles_halfbasins_L_proxy	489545	706186	46.9772
828	Poles_halfbasins_L_proxy	489131	705787	51.1994
829	Poles_halfbasins_L_proxy	487936	706167	44.1863
830	Poles_halfbasins_L_proxy	488345	705775	47.5741
831	Poles_halfbasins_L_proxy	489130	706177	48.3945
832	Poles_halfbasins_L_proxy	489935	705775	49.4288
833	Poles_halfbasins_L_proxy	487941	705773	49.2196
834	Poles_halfbasins_L_proxy	490342	705780	50.0206
835	Poles_halfbasins_L_proxy	488273	705422	50.5928
836	Poles_halfbasins_L_proxy	487938	705379	48.582
837	Poles_halfbasins_L_proxy	489143	705385	51.7713
838	Poles_halfbasins_L_proxy	488341	704970	43.9496
839	Poles_halfbasins_L_proxy	489166	704993	51.8622
840	Poles_halfbasins_L_proxy	488753	704950	46.0984
841	Poles_halfbasins_L_proxy	489941	705372	48.9027
842	Poles_halfbasins_L_proxy	489559	704981	51.8937
843	Poles_halfbasins_L_proxy	489948	704587	51.9077
844	Poles_halfbasins_L_proxy	488745	704581	47.7762
845	Poles_halfbasins_L_proxy	490347	704179	51.4483
846	Poles_halfbasins_L_proxy	489144	704583	50.2036
847	Poles_halfbasins_L_proxy	489953	704182	48.7924
848	Poles_halfbasins_L_proxy	488721	706985	44.8592
849	Poles_halfbasins_L_proxy	489150	706986	45.5912
850	Poles_halfbasins_L_proxy	488333	706979	44.7284
851	Poles_halfbasins_L_proxy	488686	706585	51.1763
852	Poles_halfbasins_L_proxy	490335	706581	43.3477
853	Poles_halfbasins_L_proxy	488738	706175	48.9285
854	Poles_halfbasins_L_proxy	488341	706169	43.7833
855	Poles_halfbasins_L_proxy	489940	706188	49.4449
856	Poles_halfbasins_L_proxy	489545	706186	46.9772
857	Poles_halfbasins_L_proxy	489131	705787	51.1994
858	Poles_halfbasins_L_proxy	487936	706167	44.1863
859	Poles_halfbasins_L_proxy	488345	705775	47.5741
860	Poles_halfbasins_L_proxy	489130	706177	48.3945
861	Poles_halfbasins_L_proxy	489935	705775	49.4288
862	Poles_halfbasins_L_proxy	487941	705773	49.2196
863	Poles_halfbasins_L_proxy	490342	705780	50.0206
864	Poles_halfbasins_L_proxy	488273	705422	50.5928
865	Poles_halfbasins_L_proxy	487938	705379	48.582
866	Poles_halfbasins_L_proxy	489143	705385	51.7713
867	Poles_halfbasins_L_proxy	488341	704970	43.9496
868	Poles_halfbasins_L_proxy	489166	704993	51.8622
869	Poles_halfbasins_L_proxy	488753	704950	46.0984
870	Poles_halfbasins_L_proxy	489941	705372	48.9027
871	Poles_halfbasins_L_proxy	489559	704981	51.8937
872	Poles_halfbasins_L_proxy	489536	704576	50.54
873	Poles_halfbasins_L_proxy	488745	704581	47.7762
874	Poles_halfbasins_L_proxy	490347	704179	51.4483
875	Poles_halfbasins_L_proxy	489144	704583	50.2036
876	Poles_halfbasins_L_proxy	489953	704182	48.7924
877	Poles_halfbasins_L_proxy	488721	706985	44.8592
878	Poles_halfbasins_L_proxy	489150	706986	45.5912
879	Poles_halfbasins_L_proxy	488333	706979	44.7284
880	Poles_halfbasins_L_proxy	488686	706585	51.1763
881	Poles_halfbasins_L_proxy	490335	706581	43.3477
882	Poles_halfbasins_L_proxy	488738	706175	48.9285
883	Poles_halfbasins_L_proxy	488341	706169	43.7833
884	Poles_halfbasins_L_proxy	489940	706188	49.4449
885	Poles_halfbasins_L_proxy	489545	706186	46.9772
886	Poles_halfbasins_L_proxy	489131	705787	51.1994
887	Poles_halfbasins_L_proxy	487936	706167	44.1863
888	Poles_halfbasins_L_proxy	488345	705775	47.5741
889	Poles_halfbasins_L_proxy	489130	706177	48.3945
890	Poles_halfbasins_L_proxy	489935	705775	49.4288
891	Poles_halfbasins_L_proxy	487941	705773	49.2196
892	Poles_halfbasins_L_proxy	490342	705780	50.0206
893	Poles_halfbasins_L_proxy	488273	705422	50.5928
894	Poles_halfbasins_L_proxy	487938	705379	48.582
895	Poles_halfbasins_L_proxy	488743	705362	49.8129
896	Poles_halfbasins_L_proxy	488341	704970	43.9496
897	Poles_halfbasins_L_proxy	488753	704950	46.0984
898	Poles_halfbasins_L_proxy	489941	705372	48.9027
899	Poles_halfbasins_L_proxy	489559	704981	51.8937
900	Poles_halfbasins_L_proxy	489536	704576	50.54
901	Poles_halfbasins_L_proxy	488745	704581	47.7762
902	Poles_halfbasins_L_proxy	490347	704179	51.4483
903	Poles_halfbasins_L_proxy	489144	704583	50.2036
904	Poles_halfbasins_L_proxy	489953	704182	48.7924
905	Poles_halfbasins_L_proxy	488721	706985	44.8592
906	Poles_halfbasins_L_proxy	489150	706986	45.5912
907	Poles_halfbasins_L_proxy	488339	706566	45.6716
908	Poles_halfbasins_L_proxy	488686	706585	51.1763
909	Poles_halfbasins_L_proxy	488738	706175	48.9285
910	Poles_halfbasins_L_proxy	488341	706169	43.7833
911	Poles_halfbasins_L_proxy	489940	706188	49.4449
912	Poles_halfbasins_L_proxy	489545	706186	46.9772
913	Poles_halfbasins_L_proxy	489131	705787	51.1994
914	Poles_halfbasins_L_proxy	487936	706167	44.1863
915	Poles_halfbasins_L_proxy	488345	705775	47.5741
916	Poles_halfbasins_L_proxy	489130	706177	48.3945
917	Poles_halfbasins_L_proxy	489935	705775	49.4288
918	Poles_halfbasins_L_proxy	487941	705773	49.2196
919	Poles_halfbasins_L_proxy	490342	705780	50.0206
920	Poles_halfbasins_L_proxy	488273	705422	50.5928
921	Poles_halfbasins_L_proxy	487938	705379	48.582
922	Poles_halfbasins_L_proxy	489143	705385	51.7713
923	Poles_halfbasins_L_proxy	488341	704970	43.9496
924	Poles_halfbasins_L_proxy	489166	704993	51.8622
925	Poles_halfbasins_L_proxy	488753	704950	46.0984
926	Poles_halfbasins_L_proxy	489941	705372	48.9027
927	Poles_halfbasins_L_proxy	489559	704981	51.8937
928	Poles_halfbasins_L_proxy	489948	704587	51.9077
929	Poles_halfbasins_L_proxy	488745	704581	47.7762
930	Poles_halfbasins_L_proxy	490347	704179	51.4483
931	Poles_halfbasins_L_proxy	489144	704583	50.2036
932	Poles_halfbasins_L_proxy	489953	704182	48.7924
933	Poles_halfbasins_L_proxy	488721	706985	44.8592
934	Poles_halfbasins_L_proxy	489150	706986	45.5912
935	Poles_halfbasins_L_proxy	488333	706979	44.7284
936	Poles_halfbasins_L_proxy	488686	706585	51.1763
937	Poles_halfbasins_L_proxy	490335	706581	43.3477
938	Poles_halfbasins_L_proxy	488738	706175	48.9285
939	Poles_halfbasins_L_proxy	488341	706169	43.7833
940	Poles_halfbasins_L_proxy	489940	706188	49.4449
941	Poles_halfbasins_L_proxy	489545	706186	46.9772
942	Poles_halfbasins_L_proxy	489131	705787	51.1994
943	Poles_halfbasins_L_proxy	487936	706167	44.1863
944	Poles_halfbasins_L_proxy	488345	705775	47.5741
945	Poles_halfbasins_L_proxy	489130	706177	48.3945
946	Poles_halfbasins_L_proxy	489935	705775	49.4288
947	Poles_halfbasins_L_proxy	487941	705773	49.2196
948	Poles_halfbasins_L_proxy	490342	705780	50.0206
949	Poles_halfbasins_L_proxy	488273	705422	50.5928
950	Poles_halfbasins_L_proxy	487938	705379	48.582
951	Poles_halfbasins_L_proxy	489143	705385	51.7713
952	Poles_halfbasins_L_proxy	488341	704970	43.9496
953	Poles_halfbasins_L_proxy	489166	704993	51.8622
954	Poles_halfbasins_L_proxy	488753	704950	46.0984
955	Poles_halfbasins_L_proxy	489941	705372	48.9027
956	Poles_halfbasins_L_proxy	489559	704981	51.8937
957	Poles_halfbasins_L_proxy	489536	704576	50.54
958	Poles_halfbasins_L_proxy	488745	704581	47.7762
959	Poles_halfbasins_L_proxy	490347	704179	51.4483
960	Poles_halfbasins_L_proxy	489144	704583	50.2036
961	Poles_halfbasins_L_proxy	489953	704182	48.7924
962	Poles_halfbasins_L_proxy	488721	706985	44.8592
963	Poles_halfbasins_L_proxy	489150	706986	45.5912
964	Poles_halfbasins_L_proxy	488333	706979	44.7284
965	Poles_halfbasins_L_proxy	488686	706585	51.1763
966	Poles_halfbasins_L_proxy	490335	706581	43.3477
967	Poles_halfbasins_L_proxy	488738	706175	48.9285
968	Poles_halfbasins_L_proxy	488341	706169	43.7833
969	Poles_halfbasins_L_proxy	489940	706188	49.4449
970	Poles_halfbasins_L_proxy	489545	706186	46.9772
971	Poles_halfbasins_L_proxy	489131	705787	51.1994
972	Poles_halfbasins_L_proxy	487936	706167	44.1863
973	Poles_halfbasins_L_proxy	488345	705775	47.5741
974	Poles_halfbasins_L_proxy	489130	706177	48.3945
975	Poles_halfbasins_L_proxy	489935	705775	49.4288
976	Poles_halfbasins_L_proxy	487941	705773	49.2196
977	Poles_halfbasins_L_proxy	490342	705780	50.0206
978	Poles_halfbasins_L_proxy	488273	705422	50.5928
979	Poles_halfbasins_L_proxy	487938	705379	48.582
980	Poles_halfbasins_L_proxy	488743	705362	49.8129
981	Poles_halfbasins_L_proxy	488341	704970	43.9496
982	Poles_halfbasins_L_proxy	488753	704950	46.0984
983	Poles_halfbasins_L_proxy	489941	705372	48.9027
984	Poles_halfbasins_L_proxy	489559	704981	51.8937
985	Poles_halfbasins_L_proxy	489536	704576	50.54
986	Poles_halfbasins_L_proxy	488745	704581	47.7762
987	Poles_halfbasins_L_proxy	490347	704179	51.4483
988	Poles_halfbasins_L_proxy	489144	704583	50.2036
989	Poles_halfbasins_L_proxy	489953	704182	48.7924
990	Poles_basins_L_proxy	488721	706985	44.8592
991	Poles_basins_L_proxy	489150	706986	45.5912
992	Poles_basins_L_proxy	488339	706566	45.6716
993	Poles_basins_L_proxy	488686	706585	51.1763
994	Poles_basins_L_proxy	488341	706169	43.7833
995	Poles_basins_L_proxy	489940	706188	49.4449
996	Poles_basins_L_proxy	489545	706186	46.9772
997	Poles_basins_L_proxy	488738	706175	48.9285
998	Poles_basins_L_proxy	487936	706167	44.1863
999	Poles_basins_L_proxy	488345	705775	47.5741
1000	Poles_basins_L_proxy	489131	705787	51.1994
1001	Poles_basins_L_proxy	489935	705775	49.4288
1002	Poles_basins_L_proxy	487941	705773	49.2196
1003	Poles_basins_L_proxy	490342	705780	50.0206
1004	Poles_basins_L_proxy	488273	705422	50.5928
1005	Poles_basins_L_proxy	487938	705379	48.582
1006	Poles_basins_L_proxy	488743	705362	49.8129
1007	Poles_basins_L_proxy	488341	704970	43.9496
1008	Poles_basins_L_proxy	489166	704993	51.8622
1009	Poles_basins_L_proxy	488753	704950	46.0984
1010	Poles_basins_L_proxy	489941	705372	48.9027
1011	Poles_basins_L_proxy	489559	704981	51.8937
1012	Poles_basins_L_proxy	489948	704587	51.9077
1013	Poles_basins_L_proxy	488745	704581	47.7762
1014	Poles_basins_L_proxy	490347	704179	51.4483
1015	Poles_basins_L_proxy	489144	704583	50.2036
1016	Poles_basins_L_proxy	489953	704182	48.7924
1017	Poles_basins_L_proxy	488721	706985	44.8592
1018	Poles_basins_L_proxy	489150	706986	45.5912
1019	Poles_basins_L_proxy	488333	706979	44.7284
1020	Poles_basins_L_proxy	488686	706585	51.1763
1021	Poles_basins_L_proxy	488341	706169	43.7833
1022	Poles_basins_L_proxy	489940	706188	49.4449
1023	Poles_basins_L_proxy	489545	706186	46.9772
1024	Poles_basins_L_proxy	488738	706175	48.9285
1025	Poles_basins_L_proxy	487936	706167	44.1863
1026	Poles_basins_L_proxy	488345	705775	47.5741
1027	Poles_basins_L_proxy	489131	705787	51.1994
1028	Poles_basins_L_proxy	489935	705775	49.4288
1029	Poles_basins_L_proxy	487941	705773	49.2196
1030	Poles_basins_L_proxy	490342	705780	50.0206
1031	Poles_basins_L_proxy	488273	705422	50.5928
1032	Poles_basins_L_proxy	487938	705379	48.582
1033	Poles_basins_L_proxy	488743	705362	49.8129
1034	Poles_basins_L_proxy	488341	704970	43.9496
1035	Poles_basins_L_proxy	489166	704993	51.8622
1036	Poles_basins_L_proxy	488753	704950	46.0984
1037	Poles_basins_L_proxy	489941	705372	48.9027
1038	Poles_basins_L_proxy	489559	704981	51.8937
1039	Poles_basins_L_proxy	489536	704576	50.54
1040	Poles_basins_L_proxy	488745	704581	47.7762
1041	Poles_basins_L_proxy	490347	704179	51.4483
1042	Poles_basins_L_proxy	489144	704583	50.2036
1043	Poles_basins_L_proxy	489953	704182	48.7924
1044	Poles_basins_L_proxy	488721	706985	44.8592
1045	Poles_basins_L_proxy	489150	706986	45.5912
1046	Poles_basins_L_proxy	488333	706979	44.7284
1047	Poles_basins_L_proxy	488686	706585	51.1763
1048	Poles_basins_L_proxy	488341	706169	43.7833
1049	Poles_basins_L_proxy	489940	706188	49.4449
1050	Poles_basins_L_proxy	489545	706186	46.9772
1051	Poles_basins_L_proxy	488738	706175	48.9285
1052	Poles_basins_L_proxy	487936	706167	44.1863
1053	Poles_basins_L_proxy	488345	705775	47.5741
1054	Poles_basins_L_proxy	489131	705787	51.1994
1055	Poles_basins_L_proxy	489935	705775	49.4288
1056	Poles_basins_L_proxy	487941	705773	49.2196
1057	Poles_basins_L_proxy	490342	705780	50.0206
1058	Poles_basins_L_proxy	488273	705422	50.5928
1059	Poles_basins_L_proxy	487938	705379	48.582
1060	Poles_basins_L_proxy	488743	705362	49.8129
1061	Poles_basins_L_proxy	488341	704970	43.9496
1062	Poles_basins_L_proxy	488753	704950	46.0984
1063	Poles_basins_L_proxy	489941	705372	48.9027
1064	Poles_basins_L_proxy	489559	704981	51.8937
1065	Poles_basins_L_proxy	489536	704576	50.54
1066	Poles_basins_L_proxy	488745	704581	47.7762
1067	Poles_basins_L_proxy	490347	704179	51.4483
1068	Poles_basins_L_proxy	489144	704583	50.2036
1069	Poles_basins_L_proxy	489953	704182	48.7924
1070	Poles_basins_L_proxy	488721	706985	44.8592
1071	Poles_basins_L_proxy	489150	706986	45.5912
1072	Poles_basins_L_proxy	488339	706566	45.6716
1073	Poles_basins_L_proxy	488686	706585	51.1763
1074	Poles_basins_L_proxy	488341	706169	43.7833
1075	Poles_basins_L_proxy	489940	706188	49.4449
1076	Poles_basins_L_proxy	489545	706186	46.9772
1077	Poles_basins_L_proxy	488738	706175	48.9285
1078	Poles_basins_L_proxy	487936	706167	44.1863
1079	Poles_basins_L_proxy	488345	705775	47.5741
1080	Poles_basins_L_proxy	489131	705787	51.1994
1081	Poles_basins_L_proxy	489935	705775	49.4288
1082	Poles_basins_L_proxy	487941	705773	49.2196
1083	Poles_basins_L_proxy	490342	705780	50.0206
1084	Poles_basins_L_proxy	488273	705422	50.5928
1085	Poles_basins_L_proxy	487938	705379	48.582
1086	Poles_basins_L_proxy	488743	705362	49.8129
1087	Poles_basins_L_proxy	488341	704970	43.9496
1088	Poles_basins_L_proxy	489166	704993	51.8622
1089	Poles_basins_L_proxy	488753	704950	46.0984
1090	Poles_basins_L_proxy	489941	705372	48.9027
1091	Poles_basins_L_proxy	489559	704981	51.8937
1092	Poles_basins_L_proxy	489948	704587	51.9077
1093	Poles_basins_L_proxy	488745	704581	47.7762
1094	Poles_basins_L_proxy	490347	704179	51.4483
1095	Poles_basins_L_proxy	489144	704583	50.2036
1096	Poles_basins_L_proxy	489953	704182	48.7924
1097	Poles_basins_L_proxy	488721	706985	44.8592
1098	Poles_basins_L_proxy	489150	706986	45.5912
1099	Poles_basins_L_proxy	488333	706979	44.7284
1100	Poles_basins_L_proxy	488686	706585	51.1763
1101	Poles_basins_L_proxy	488341	706169	43.7833
1102	Poles_basins_L_proxy	489940	706188	49.4449
1103	Poles_basins_L_proxy	489545	706186	46.9772
1104	Poles_basins_L_proxy	488738	706175	48.9285
1105	Poles_basins_L_proxy	487936	706167	44.1863
1106	Poles_basins_L_proxy	488345	705775	47.5741
1107	Poles_basins_L_proxy	489131	705787	51.1994
1108	Poles_basins_L_proxy	489935	705775	49.4288
1109	Poles_basins_L_proxy	487941	705773	49.2196
1110	Poles_basins_L_proxy	490342	705780	50.0206
1111	Poles_basins_L_proxy	488273	705422	50.5928
1112	Poles_basins_L_proxy	487938	705379	48.582
1113	Poles_basins_L_proxy	488743	705362	49.8129
1114	Poles_basins_L_proxy	488341	704970	43.9496
1115	Poles_basins_L_proxy	489166	704993	51.8622
1116	Poles_basins_L_proxy	488753	704950	46.0984
1117	Poles_basins_L_proxy	489941	705372	48.9027
1118	Poles_basins_L_proxy	489559	704981	51.8937
1119	Poles_basins_L_proxy	489536	704576	50.54
1120	Poles_basins_L_proxy	488745	704581	47.7762
1121	Poles_basins_L_proxy	490347	704179	51.4483
1122	Poles_basins_L_proxy	489144	704583	50.2036
1123	Poles_basins_L_proxy	489953	704182	48.7924
1124	Poles_basins_L_proxy	488721	706985	44.8592
1125	Poles_basins_L_proxy	489150	706986	45.5912
1126	Poles_basins_L_proxy	488333	706979	44.7284
1127	Poles_basins_L_proxy	488686	706585	51.1763
1128	Poles_basins_L_proxy	488341	706169	43.7833
1129	Poles_basins_L_proxy	489940	706188	49.4449
1130	Poles_basins_L_proxy	489545	706186	46.9772
1131	Poles_basins_L_proxy	488738	706175	48.9285
1132	Poles_basins_L_proxy	487936	706167	44.1863
1133	Poles_basins_L_proxy	488345	705775	47.5741
1134	Poles_basins_L_proxy	489131	705787	51.1994
1135	Poles_basins_L_proxy	489935	705775	49.4288
1136	Poles_basins_L_proxy	487941	705773	49.2196
1137	Poles_basins_L_proxy	490342	705780	50.0206
1138	Poles_basins_L_proxy	488273	705422	50.5928
1139	Poles_basins_L_proxy	487938	705379	48.582
1140	Poles_basins_L_proxy	488743	705362	49.8129
1141	Poles_basins_L_proxy	488341	704970	43.9496
1142	Poles_basins_L_proxy	488753	704950	46.0984
1143	Poles_basins_L_proxy	489941	705372	48.9027
1144	Poles_basins_L_proxy	489559	704981	51.8937
1145	Poles_basins_L_proxy	489536	704576	50.54
1146	Poles_basins_L_proxy	488745	704581	47.7762
1147	Poles_basins_L_proxy	490347	704179	51.4483
1148	Poles_basins_L_proxy	489144	704583	50.2036
1149	Poles_basins_L_proxy	489953	704182	48.7924
1150	Poles_basins_L_proxy	488721	706985	44.8592
1151	Poles_basins_L_proxy	489150	706986	45.5912
1152	Poles_basins_L_proxy	488339	706566	45.6716
1153	Poles_basins_L_proxy	488686	706585	51.1763
1154	Poles_basins_L_proxy	488341	706169	43.7833
1155	Poles_basins_L_proxy	489940	706188	49.4449
1156	Poles_basins_L_proxy	489545	706186	46.9772
1157	Poles_basins_L_proxy	488738	706175	48.9285
1158	Poles_basins_L_proxy	487936	706167	44.1863
1159	Poles_basins_L_proxy	488345	705775	47.5741
1160	Poles_basins_L_proxy	489131	705787	51.1994
1161	Poles_basins_L_proxy	489935	705775	49.4288
1162	Poles_basins_L_proxy	487941	705773	49.2196
1163	Poles_basins_L_proxy	490342	705780	50.0206
1164	Poles_basins_L_proxy	488273	705422	50.5928
1165	Poles_basins_L_proxy	487938	705379	48.582
1166	Poles_basins_L_proxy	488743	705362	49.8129
1167	Poles_basins_L_proxy	488341	704970	43.9496
1168	Poles_basins_L_proxy	489166	704993	51.8622
1169	Poles_basins_L_proxy	488753	704950	46.0984
1170	Poles_basins_L_proxy	489941	705372	48.9027
1171	Poles_basins_L_proxy	489559	704981	51.8937
1172	Poles_basins_L_proxy	489948	704587	51.9077
1173	Poles_basins_L_proxy	488745	704581	47.7762
1174	Poles_basins_L_proxy	490347	704179	51.4483
1175	Poles_basins_L_proxy	489144	704583	50.2036
1176	Poles_basins_L_proxy	489953	704182	48.7924
1177	Poles_basins_L_proxy	488721	706985	44.8592
1178	Poles_basins_L_proxy	489150	706986	45.5912
1179	Poles_basins_L_proxy	488333	706979	44.7284
1180	Poles_basins_L_proxy	488686	706585	51.1763
1181	Poles_basins_L_proxy	488341	706169	43.7833
1182	Poles_basins_L_proxy	489940	706188	49.4449
1183	Poles_basins_L_proxy	489545	706186	46.9772
1184	Poles_basins_L_proxy	488738	706175	48.9285
1185	Poles_basins_L_proxy	487936	706167	44.1863
1186	Poles_basins_L_proxy	488345	705775	47.5741
1187	Poles_basins_L_proxy	489131	705787	51.1994
1188	Poles_basins_L_proxy	489935	705775	49.4288
1189	Poles_basins_L_proxy	487941	705773	49.2196
1190	Poles_basins_L_proxy	490342	705780	50.0206
1191	Poles_basins_L_proxy	488273	705422	50.5928
1192	Poles_basins_L_proxy	487938	705379	48.582
1193	Poles_basins_L_proxy	488743	705362	49.8129
1194	Poles_basins_L_proxy	488341	704970	43.9496
1195	Poles_basins_L_proxy	489166	704993	51.8622
1196	Poles_basins_L_proxy	488753	704950	46.0984
1197	Poles_basins_L_proxy	489941	705372	48.9027
1198	Poles_basins_L_proxy	489559	704981	51.8937
1199	Poles_basins_L_proxy	489536	704576	50.54
1200	Poles_basins_L_proxy	488745	704581	47.7762
1201	Poles_basins_L_proxy	490347	704179	51.4483
1202	Poles_basins_L_proxy	489144	704583	50.2036
1203	Poles_basins_L_proxy	489953	704182	48.7924
1204	Poles_basins_L_proxy	488721	706985	44.8592
1205	Poles_basins_L_proxy	489150	706986	45.5912
1206	Poles_basins_L_proxy	488333	706979	44.7284
1207	Poles_basins_L_proxy	488686	706585	51.1763
1208	Poles_basins_L_proxy	488341	706169	43.7833
1209	Poles_basins_L_proxy	489940	706188	49.4449
1210	Poles_basins_L_proxy	489545	706186	46.9772
1211	Poles_basins_L_proxy	488738	706175	48.9285
1212	Poles_basins_L_proxy	487936	706167	44.1863
1213	Poles_basins_L_proxy	488345	705775	47.5741
1214	Poles_basins_L_proxy	489131	705787	51.1994
1215	Poles_basins_L_proxy	489935	705775	49.4288
1216	Poles_basins_L_proxy	487941	705773	49.2196
1217	Poles_basins_L_proxy	490342	705780	50.0206
1218	Poles_basins_L_proxy	488273	705422	50.5928
1219	Poles_basins_L_proxy	487938	705379	48.582
1220	Poles_basins_L_proxy	488743	705362	49.8129
1221	Poles_basins_L_proxy	488341	704970	43.9496
1222	Poles_basins_L_proxy	488753	704950	46.0984
1223	Poles_basins_L_proxy	489941	705372	48.9027
1224	Poles_basins_L_proxy	489559	704981	51.8937
1225	Poles_basins_L_proxy	489536	704576	50.54
1226	Poles_basins_L_proxy	488745	704581	47.7762
1227	Poles_basins_L_proxy	490347	704179	51.4483
1228	Poles_basins_L_proxy	489144	704583	50.2036
1229	Poles_basins_L_proxy	489953	704182	48.7924
1230	Poles_basins_L_proxy	488721	706985	44.8592
1231	Poles_basins_L_proxy	489150	706986	45.5912
1232	Poles_basins_L_proxy	488339	706566	45.6716
1233	Poles_basins_L_proxy	488686	706585	51.1763
1234	Poles_basins_L_proxy	488341	706169	43.7833
1235	Poles_basins_L_proxy	489940	706188	49.4449
1236	Poles_basins_L_proxy	489545	706186	46.9772
1237	Poles_basins_L_proxy	488738	706175	48.9285
1238	Poles_basins_L_proxy	487936	706167	44.1863
1239	Poles_basins_L_proxy	488345	705775	47.5741
1240	Poles_basins_L_proxy	489131	705787	51.1994
1241	Poles_basins_L_proxy	489935	705775	49.4288
1242	Poles_basins_L_proxy	487941	705773	49.2196
1243	Poles_basins_L_proxy	490342	705780	50.0206
1244	Poles_basins_L_proxy	488273	705422	50.5928
1245	Poles_basins_L_proxy	487938	705379	48.582
1246	Poles_basins_L_proxy	488743	705362	49.8129
1247	Poles_basins_L_proxy	488341	704970	43.9496
1248	Poles_basins_L_proxy	489166	704993	51.8622
1249	Poles_basins_L_proxy	488753	704950	46.0984
1250	Poles_basins_L_proxy	489941	705372	48.9027
1251	Poles_basins_L_proxy	489559	704981	51.8937
1252	Poles_basins_L_proxy	489948	704587	51.9077
1253	Poles_basins_L_proxy	488745	704581	47.7762
1254	Poles_basins_L_proxy	490347	704179	51.4483
1255	Poles_basins_L_proxy	489144	704583	50.2036
1256	Poles_basins_L_proxy	489953	704182	48.7924
1257	Poles_basins_L_proxy	488721	706985	44.8592
1258	Poles_basins_L_proxy	489150	706986	45.5912
1259	Poles_basins_L_proxy	488333	706979	44.7284
1260	Poles_basins_L_proxy	488686	706585	51.1763
1261	Poles_basins_L_proxy	488341	706169	43.7833
1262	Poles_basins_L_proxy	489940	706188	49.4449
1263	Poles_basins_L_proxy	489545	706186	46.9772
1264	Poles_basins_L_proxy	488738	706175	48.9285
1265	Poles_basins_L_proxy	487936	706167	44.1863
1266	Poles_basins_L_proxy	488345	705775	47.5741
1267	Poles_basins_L_proxy	489131	705787	51.1994
1268	Poles_basins_L_proxy	489935	705775	49.4288
1269	Poles_basins_L_proxy	487941	705773	49.2196
1270	Poles_basins_L_proxy	490342	705780	50.0206
1271	Poles_basins_L_proxy	488273	705422	50.5928
1272	Poles_basins_L_proxy	487938	705379	48.582
1273	Poles_basins_L_proxy	488743	705362	49.8129
1274	Poles_basins_L_proxy	488341	704970	43.9496
1275	Poles_basins_L_proxy	489166	704993	51.8622
1276	Poles_basins_L_proxy	488753	704950	46.0984
1277	Poles_basins_L_proxy	489941	705372	48.9027
1278	Poles_basins_L_proxy	489559	704981	51.8937
1279	Poles_basins_L_proxy	489536	704576	50.54
1280	Poles_basins_L_proxy	488745	704581	47.7762
1281	Poles_basins_L_proxy	490347	704179	51.4483
1282	Poles_basins_L_proxy	489144	704583	50.2036
1283	Poles_basins_L_proxy	489953	704182	48.7924
1284	Poles_basins_L_proxy	488721	706985	44.8592
1285	Poles_basins_L_proxy	489150	706986	45.5912
1286	Poles_basins_L_proxy	488333	706979	44.7284
1287	Poles_basins_L_proxy	488686	706585	51.1763
1288	Poles_basins_L_proxy	488341	706169	43.7833
1289	Poles_basins_L_proxy	489940	706188	49.4449
1290	Poles_basins_L_proxy	489545	706186	46.9772
1291	Poles_basins_L_proxy	488738	706175	48.9285
1292	Poles_basins_L_proxy	487936	706167	44.1863
1293	Poles_basins_L_proxy	488345	705775	47.5741
1294	Poles_basins_L_proxy	489131	705787	51.1994
1295	Poles_basins_L_proxy	489935	705775	49.4288
1296	Poles_basins_L_proxy	487941	705773	49.2196
1297	Poles_basins_L_proxy	490342	705780	50.0206
1298	Poles_basins_L_proxy	488273	705422	50.5928
1299	Poles_basins_L_proxy	487938	705379	48.582
1300	Poles_basins_L_proxy	488743	705362	49.8129
1301	Poles_basins_L_proxy	488341	704970	43.9496
1302	Poles_basins_L_proxy	488753	704950	46.0984
1303	Poles_basins_L_proxy	489941	705372	48.9027
1304	Poles_basins_L_proxy	489559	704981	51.8937
1305	Poles_basins_L_proxy	489536	704576	50.54
1306	Poles_basins_L_proxy	488745	704581	47.7762
1307	Poles_basins_L_proxy	490347	704179	51.4483
1308	Poles_basins_L_proxy	489144	704583	50.2036
1309	Poles_basins_L_proxy	489953	704182	48.7924
