# Supplementary material for: A workflow to optimize spatial sampling in ecoacoustic studies
Source: Research Square preprint supplement (doi:10.21203/rs.3.rs-7207339/v1), 2025-10-10
Supplement: Supplementary file 13 [file DF1-2_Interpolations_variograms_and_error_for_complete_scenarios.xlsx]

## Sheet: DATA
GeoJSON	Variable	Num_Points	Sill	Nugget	Range	Empiric_RMSE	Empiric_RMSE_Relative	Calculate_NDSI_BI	RMSE_theoretical	RMSE_Relative_theoretical
AndeanRural_R12-24_Full_complete	mean_ACItf	41	5.26513e+06	1277.04	200	1.63463e+06	41.2674	FALSE	2407.9	0.060789
AndeanRural_R12-24_Full_complete	mean_ACIft	41	9.96429e+07	748.014	200	2.50916e+07	73.6832	FALSE	10212.6	0.02999
AndeanRural_R12-24_Full_complete	mean_NP	41	0.717232	131.732	200	0.198955	0.0531985	FALSE	0.850861	0.227511
AndeanRural_R12-24_Full_complete	median_ACItf	41	6.06911e+06	1277.04	200	1.96889e+06	50.4627	FALSE	2540.91	0.0651233
AndeanRural_R12-24_Full_complete	median_ACIft	41	1.46451e+08	773.25	200	3.76292e+07	110.405	FALSE	11708.9	0.0343542
AndeanRural_R12-24_Full_complete	median_NP	41	0.530386	789.319	200	0.291437	0.0824064	FALSE	0.908319	0.256835
AndeanRural_R12-24_Dawn_complete	mean_ACItf	38	2.97083e+06	547.071	200	967679	25.7957	FALSE	1992.07	0.0531032
AndeanRural_R12-24_Dawn_complete	mean_ACIft	38	1.03454e+08	1268.81	200	3.10599e+07	95.3195	FALSE	11049.2	0.0339089
AndeanRural_R12-24_Dawn_complete	mean_NP	38	0.571039	403.67	200	0.20951	0.0542649	FALSE	0.782569	0.202692
AndeanRural_R12-24_Dawn_complete	median_ACItf	38	2.78903e+06	825.718	200	851052	23.2752	FALSE	2016.64	0.0551526
AndeanRural_R12-24_Dawn_complete	median_ACIft	38	1.03199e+08	1268.81	200	3.38263e+07	104.33	FALSE	11834.9	0.0365025
AndeanRural_R12-24_Dawn_complete	median_NP	38	0.738911	1268.81	200	0.407532	0.108295	FALSE	0.962442	0.255754
AndeanRural_R12-24_Evening_complete	mean_ACItf	39	1.08644e+07	484.423	200	3.3928e+06	83.0712	FALSE	3618.05	0.0885861
AndeanRural_R12-24_Evening_complete	mean_ACIft	39	7.97815e+07	724.462	200	1.65644e+07	47.5098	FALSE	8868.66	0.0254369
AndeanRural_R12-24_Evening_complete	mean_NP	39	0.986891	75.5894	200	0.223087	0.0626421	FALSE	0.982049	0.275757
AndeanRural_R12-24_Evening_complete	median_ACItf	39	1.09795e+07	0.00085742	200	3.53333e+06	87.4449	FALSE	3598.94	0.0890687
AndeanRural_R12-24_Evening_complete	median_ACIft	39	9.63255e+07	718.651	200	2.31776e+07	66.3421	FALSE	10030.1	0.0287096
AndeanRural_R12-24_Evening_complete	median_NP	39	0.880941	124.103	200	0.329873	0.0982065	FALSE	1.103	0.328375
AndeanRural_R0-2_Evening_complete	mean_ACItf	39	249219	16.2031	200	43712.1	5.90755	TRUE	516.741	0.0698358
AndeanRural_R0-2_Evening_complete	mean_ACIft	39	7.91511e+06	654.513	200	1.62096e+06	26.5381	TRUE	2651.93	0.0434171
AndeanRural_R0-2_Evening_complete	mean_BI	39	0.0689504	9.18136	200	0.0199467	0.0165104	TRUE	0.271888	0.225048
AndeanRural_R0-2_Evening_complete	mean_NP	39	0.0721105	479.09	200	0.0242001	0.0239755	TRUE	0.330597	0.327529
AndeanRural_R0-2_Evening_complete	mean_NDSI	39	0.0648128	675.142	200	0.0168552	0.0307136	TRUE	0.243558	0.443812
AndeanRural_R0-2_Evening_complete	median_ACItf	39	239546	348.058	200	45734.6	6.29635	TRUE	489.381	0.0673739
AndeanRural_R0-2_Evening_complete	median_ACIft	39	8.88339e+06	632.702	200	1.65243e+06	27.3608	TRUE	2903.15	0.0480702
AndeanRural_R0-2_Evening_complete	median_BI	39	0.0749926	100.789	200	0.0207262	0.0175046	TRUE	0.285406	0.241044
AndeanRural_R0-2_Evening_complete	median_NP	39	0.00503361	1423.15	200	0.0035204	0.00334867	TRUE	0.399099	0.37963
AndeanRural_R0-2_Evening_complete	median_NDSI	39	0.091148	678.155	200	0.0296172	0.0483477	TRUE	0.304148	0.496497
AndeanRural_R0-24_Full_complete	mean_ACItf	41	1.59577e+07	1277.04	200	4.09419e+06	53.9455	TRUE	3886.7	0.0512116
AndeanRural_R0-24_Full_complete	mean_ACIft	41	4.452e+08	762.479	200	6.24364e+07	90.9526	TRUE	20930.1	0.0304894
AndeanRural_R0-24_Full_complete	mean_NP	41	0.935263	665.163	200	0.206759	0.0238161	TRUE	0.968998	0.111617
AndeanRural_R0-24_Full_complete	median_ACItf	41	1.51076e+07	1277.04	200	3.65004e+06	48.7509	TRUE	3708.68	0.0495341
AndeanRural_R0-24_Full_complete	median_ACIft	41	5.59382e+08	727.251	200	8.29036e+07	120.736	TRUE	23253.8	0.0338656
AndeanRural_R0-24_Full_complete	median_NP	41	0.868861	843.705	200	0.277921	0.0327436	TRUE	1.11187	0.130996
AndeanRural_R0-24_Dawn_complete	mean_ACItf	38	8.73423e+06	716.445	200	2.71423e+06	37.2561	TRUE	3171.94	0.0435387
AndeanRural_R0-24_Dawn_complete	mean_ACIft	38	3.33771e+08	1268.81	200	1.21599e+08	183.467	TRUE	20310	0.0306435
AndeanRural_R0-24_Dawn_complete	mean_NP	38	1.18302	649.215	200	0.320971	0.0347009	TRUE	1.18315	0.127913
AndeanRural_R0-24_Dawn_complete	median_ACItf	38	8.52078e+06	880.497	200	3.11119e+06	43.4625	TRUE	3219.02	0.0449688
AndeanRural_R0-24_Dawn_complete	median_ACIft	38	3.49649e+08	851.97	200	1.39243e+08	210.538	TRUE	22107.1	0.0334263
AndeanRural_R0-24_Dawn_complete	median_NP	38	0.962291	593.511	200	0.413827	0.04578	TRUE	1.2037	0.13316
AndeanRural_R2-12_Full_complete	mean_ACItf	41	2.50614e+06	1277.04	200	547957	18.036	FALSE	1560.68	0.0513698
AndeanRural_R2-12_Full_complete	mean_ACIft	41	1.35137e+08	648.741	200	1.45657e+07	53.3498	FALSE	11398.2	0.0417482
AndeanRural_R2-12_Full_complete	mean_NP	41	0.224764	1277.04	200	0.0554645	0.0168773	FALSE	0.507296	0.154365
AndeanRural_R2-12_Full_complete	median_ACItf	41	1.84343e+06	642.187	200	370179	12.3905	FALSE	1388.71	0.0464824
AndeanRural_R2-12_Full_complete	median_ACIft	41	1.66091e+08	522.331	200	2.20563e+07	80.8515	FALSE	12744.7	0.0467183
AndeanRural_R2-12_Full_complete	median_NP	41	0.157119	1277.04	200	0.0736671	0.0234136	FALSE	0.662378	0.210523
AndeanRural_R0-24_Evening_complete	mean_ACItf	39	2.56156e+07	0.00233256	200	7.34414e+06	92.7608	TRUE	5433.03	0.0686224
AndeanRural_R0-24_Evening_complete	mean_ACIft	39	2.09755e+08	431.859	200	4.38337e+07	61.7514	TRUE	16180.5	0.0227946
AndeanRural_R0-24_Evening_complete	mean_NP	39	1.21485	368.768	200	0.234616	0.0272066	TRUE	1.03762	0.120324
AndeanRural_R0-24_Evening_complete	median_ACItf	39	2.25489e+07	0.00195473	200	6.6581e+06	84.9064	TRUE	5046.87	0.0643594
AndeanRural_R0-24_Evening_complete	median_ACIft	39	2.42214e+08	482.7	200	4.15822e+07	58.5501	TRUE	16908.2	0.0238077
AndeanRural_R0-24_Evening_complete	median_NP	39	1.40151	540.278	200	0.328432	0.038992	TRUE	1.25469	0.148959
AndeanRural_R2-12_Dawn_complete	mean_ACItf	38	1.80061e+06	767.368	200	501459	16.8705	FALSE	1428.56	0.0480609
AndeanRural_R2-12_Dawn_complete	mean_ACIft	38	1.14936e+08	450.686	200	3.25743e+07	122.672	FALSE	11488.5	0.0432645
AndeanRural_R2-12_Dawn_complete	mean_NP	38	0.268548	1268.81	200	0.0394761	0.0107764	FALSE	0.541281	0.147761
AndeanRural_R2-12_Dawn_complete	median_ACItf	38	1.86455e+06	387.771	200	460506	15.7004	FALSE	1476.99	0.0503562
AndeanRural_R2-12_Dawn_complete	median_ACIft	38	1.44757e+08	1268.81	200	3.74352e+07	141.263	FALSE	12650.6	0.0477376
AndeanRural_R2-12_Dawn_complete	median_NP	38	0.224157	1268.81	200	0.0895184	0.0249209	FALSE	0.6437	0.179199
AndeanRural_R0-2_Full_complete	mean_ACItf	41	160030	699.009	200	31092.9	4.40135	TRUE	390.603	0.0552917
AndeanRural_R0-2_Full_complete	mean_ACIft	41	7.01299e+06	653.778	200	1.62267e+06	26.2751	TRUE	2532.32	0.0410046
AndeanRural_R0-2_Full_complete	mean_BI	41	0.069215	1277.04	200	0.0198591	0.0221644	TRUE	0.273476	0.305222
AndeanRural_R0-2_Full_complete	mean_NP	41	0.0291829	1277.04	200	0.0062713	0.00555395	TRUE	0.259645	0.229945
AndeanRural_R0-2_Full_complete	mean_NDSI	41	0.0926317	572.441	200	0.0126016	0.0329374	TRUE	0.29429	0.769203
AndeanRural_R0-2_Full_complete	median_ACItf	41	162959	766.143	200	29352.6	4.24892	TRUE	396.691	0.0574228
AndeanRural_R0-2_Full_complete	median_ACIft	41	7.68369e+06	1218.9	200	1.53542e+06	25.1276	TRUE	2548.5	0.041707
AndeanRural_R0-2_Full_complete	median_BI	41	0.077669	1277.04	200	0.0223623	0.0271385	TRUE	0.297306	0.360806
AndeanRural_R0-2_Full_complete	median_NP	41	0.00138702	675.863	200	0.00118102	0.00110049	TRUE	0.35	0.326136
AndeanRural_R0-2_Full_complete	median_NDSI	41	0.128478	675.425	200	0.0160709	0.0367571	TRUE	0.337654	0.772275
AndeanRural_R2-12_Evening_complete	mean_ACItf	39	3.3127e+06	0.034969	200	966768	30.0802	FALSE	2037.89	0.0634074
AndeanRural_R2-12_Evening_complete	mean_ACIft	39	6.37784e+07	0.0285987	200	1.84588e+07	63.9649	FALSE	8868.94	0.0307334
AndeanRural_R2-12_Evening_complete	mean_NP	39	0.41171	663.438	200	0.078898	0.0218753	FALSE	0.625413	0.173402
AndeanRural_R2-12_Evening_complete	median_ACItf	39	2.50513e+06	103.65	200	606513	19.1146	FALSE	1699.23	0.053552
AndeanRural_R2-12_Evening_complete	median_ACIft	39	6.92086e+07	0.0347695	200	1.67261e+07	57.9922	FALSE	9122.85	0.0316305
AndeanRural_R2-12_Evening_complete	median_NP	39	0.190465	693.518	200	0.0805338	0.0226774	FALSE	0.66548	0.187391
AndeanRural_R0-2_Dawn_complete	mean_ACItf	38	120271	498.673	200	28717.1	4.28015	TRUE	376.013	0.0560429
AndeanRural_R0-2_Dawn_complete	mean_ACIft	38	6.94254e+06	841.077	200	1.60384e+06	26.4867	TRUE	2484.97	0.0410382
AndeanRural_R0-2_Dawn_complete	mean_BI	38	0.0572758	844.319	200	0.0188335	0.0259034	TRUE	0.28974	0.398505
AndeanRural_R0-2_Dawn_complete	mean_NP	38	0.0587917	1099.25	200	0.00811915	0.0068454	TRUE	0.29454	0.248332
AndeanRural_R0-2_Dawn_complete	mean_NDSI	38	0.0823588	690.265	200	0.0207544	0.0657214	TRUE	0.287563	0.910604
AndeanRural_R0-2_Dawn_complete	median_ACItf	38	126450	1268.81	200	32451	4.94273	TRUE	385.602	0.0587325
AndeanRural_R0-2_Dawn_complete	median_ACIft	38	6.18442e+06	760.801	200	1.67206e+06	27.8078	TRUE	2416.08	0.0401814
AndeanRural_R0-2_Dawn_complete	median_BI	38	0.0684818	1268.81	200	0.0161595	0.0239857	TRUE	0.303163	0.449988
AndeanRural_R0-2_Dawn_complete	median_NP	38	0.0131759	1071.1	200	0.00801251	0.00708082	TRUE	0.419572	0.370784
AndeanRural_R0-2_Dawn_complete	median_NDSI	38	0.0800339	682.229	200	0.0226368	0.0708556	TRUE	0.299617	0.93783
AndeanUrban_R0-2_Full_complete	mean_ACItf	54	194915	3528.38	200	34512.8	4.91223	TRUE	407.389	0.057984
AndeanUrban_R0-2_Full_complete	mean_ACIft	54	9.34868e+06	3528.38	200	1.78742e+06	27.9333	TRUE	2739.51	0.0428123
AndeanUrban_R0-2_Full_complete	mean_BI	54	0.0583349	3528.38	200	0.00996494	0.013914	TRUE	0.239316	0.334155
AndeanUrban_R0-2_Full_complete	mean_NP	54	0.0175364	112.014	200	0.00489715	0.00437981	TRUE	0.212447	0.190004
AndeanUrban_R0-2_Full_complete	mean_NDSI	54	0.0519401	3528.38	200	0.00706476	0.174106	TRUE	0.226567	5.58358
AndeanUrban_R0-2_Full_complete	median_ACItf	54	206280	3528.38	200	38022.2	5.48754	TRUE	403.421	0.0582236
AndeanUrban_R0-2_Full_complete	median_ACIft	54	1.19165e+07	3528.38	200	2.29493e+06	36.0234	TRUE	3029.59	0.0475553
AndeanUrban_R0-2_Full_complete	median_BI	54	0.0722694	3528.38	200	0.0143894	0.0216834	TRUE	0.265656	0.400318
AndeanUrban_R0-2_Full_complete	median_NP	54	0.000186915	3528.38	200	0.000180826	0.000171309	TRUE	0.233383	0.2211
AndeanUrban_R0-2_Full_complete	median_NDSI	54	0.0574259	3528.38	200	0.00817445	0.136273	TRUE	0.242269	4.03876
AndeanUrban_R0-24_Evening_complete	mean_ACItf	54	1.53409e+07	1715.33	200	3.31478e+06	44.5323	TRUE	4690.58	0.0630154
AndeanUrban_R0-24_Evening_complete	mean_ACIft	54	8.47024e+08	3528.38	200	1.42115e+08	210.034	TRUE	28903.5	0.0427169
AndeanUrban_R0-24_Evening_complete	mean_NP	54	1.61802	46.8387	200	0.379679	0.0437965	TRUE	1.43191	0.165173
AndeanUrban_R0-24_Evening_complete	median_ACItf	54	1.55286e+07	1736.74	200	3.27426e+06	44.3912	TRUE	4379.63	0.0593775
AndeanUrban_R0-24_Evening_complete	median_ACIft	54	8.85868e+08	3528.38	200	1.52359e+08	225.193	TRUE	27949.2	0.0413101
AndeanUrban_R0-24_Evening_complete	median_NP	54	1.46417	0.000343334	200	0.459019	0.0546572	TRUE	1.53549	0.182836
AndeanUrban_R0-2_Dawn_complete	mean_ACItf	54	176342	3528.38	200	39625	5.74621	TRUE	377.77	0.0547822
AndeanUrban_R0-2_Dawn_complete	mean_ACIft	54	9.79086e+06	3528.38	200	1.8527e+06	29.1418	TRUE	2746.72	0.0432041
AndeanUrban_R0-2_Dawn_complete	mean_BI	54	0.110604	3528.38	200	0.0161851	0.0207161	TRUE	0.320778	0.410578
AndeanUrban_R0-2_Dawn_complete	mean_NP	54	0.0368784	34.1485	200	0.00788853	0.00703894	TRUE	0.245721	0.219257
AndeanUrban_R0-2_Dawn_complete	mean_NDSI	54	0.0469426	2651.47	200	0.0124384	0.11281	TRUE	0.216994	1.96802
AndeanUrban_R0-2_Dawn_complete	median_ACItf	54	217652	3528.38	200	53395.5	7.79481	TRUE	418.801	0.0611376
AndeanUrban_R0-2_Dawn_complete	median_ACIft	54	1.22484e+07	3528.38	200	2.33228e+06	36.7981	TRUE	3061.33	0.0483009
AndeanUrban_R0-2_Dawn_complete	median_BI	54	0.128784	3528.38	200	0.0238765	0.0322324	TRUE	0.347375	0.468944
AndeanUrban_R0-2_Dawn_complete	median_NP	54	0.000811598	204.037	200	0.000582855	0.000533461	TRUE	0.29533	0.270302
AndeanUrban_R0-2_Dawn_complete	median_NDSI	54	0.0461234	814.043	200	0.00998172	0.0839585	TRUE	0.217823	1.83216
AndeanUrban_R0-2_Evening_complete	mean_ACItf	54	189252	3528.38	200	29313.7	4.09788	TRUE	448.061	0.0626363
AndeanUrban_R0-2_Evening_complete	mean_ACIft	54	1.01507e+07	3528.38	200	1.62631e+06	25.3164	TRUE	2755.14	0.0428889
AndeanUrban_R0-2_Evening_complete	mean_BI	54	0.0492824	1381.5	200	0.00594151	0.00713595	TRUE	0.232189	0.278866
AndeanUrban_R0-2_Evening_complete	mean_NP	54	0.0300816	246.436	200	0.00731565	0.00641101	TRUE	0.23248	0.203732
AndeanUrban_R0-2_Evening_complete	mean_NDSI	54	0.0743335	1054.72	200	0.00945909	0.0745991	TRUE	0.276006	2.17672
AndeanUrban_R0-2_Evening_complete	median_ACItf	54	180731	3528.38	200	34131.6	4.83916	TRUE	399.496	0.0566404
AndeanUrban_R0-2_Evening_complete	median_ACIft	54	1.33752e+07	3528.38	200	2.35103e+06	36.6774	TRUE	3126.24	0.0487711
AndeanUrban_R0-2_Evening_complete	median_BI	54	0.0622821	2198.82	200	0.010039	0.0125393	TRUE	0.253015	0.316033
AndeanUrban_R0-2_Evening_complete	median_NP	54	0.000186915	3528.38	200	0.000180826	0.000171309	TRUE	0.233383	0.2211
AndeanUrban_R0-2_Evening_complete	median_NDSI	54	0.0883644	1163.94	200	0.00999469	0.0694614	TRUE	0.303974	2.11257
AndeanUrban_R0-24_Full_complete	mean_ACItf	54	1.12545e+07	181.857	200	2.41928e+06	33.2718	TRUE	4205.02	0.0578306
AndeanUrban_R0-24_Full_complete	mean_ACIft	54	9.83575e+08	3528.38	200	1.5766e+08	236.594	TRUE	31555.5	0.0473541
AndeanUrban_R0-24_Full_complete	mean_NP	54	1.58668	46.9661	200	0.268094	0.0329674	TRUE	1.3408	0.164877
AndeanUrban_R0-24_Full_complete	median_ACItf	54	1.21514e+07	2220.08	200	2.23483e+06	31.201	TRUE	3820.8	0.053343
AndeanUrban_R0-24_Full_complete	median_ACIft	54	1.22909e+09	3528.38	200	1.92507e+08	289.387	TRUE	31704.5	0.04766
AndeanUrban_R0-24_Full_complete	median_NP	54	1.44292	0.00010144	200	0.344261	0.044157	TRUE	1.50104	0.192533
AndeanUrban_R0-24_Dawn_complete	mean_ACItf	54	1.3696e+07	103.985	200	2.16241e+06	29.8782	TRUE	6157.32	0.0850764
AndeanUrban_R0-24_Dawn_complete	mean_ACIft	54	1.20335e+09	3528.38	200	1.77843e+08	269.407	TRUE	33289.5	0.050429
AndeanUrban_R0-24_Dawn_complete	mean_NP	54	2.93322	52.5135	200	0.691634	0.0800793	TRUE	1.85908	0.215249
AndeanUrban_R0-24_Dawn_complete	median_ACItf	54	1.67489e+07	3528.38	200	3.21459e+06	44.7291	TRUE	7823.14	0.108854
AndeanUrban_R0-24_Dawn_complete	median_ACIft	54	1.30068e+09	3528.38	200	1.8714e+08	283.184	TRUE	33325	0.0504281
AndeanUrban_R0-24_Dawn_complete	median_NP	54	2.99837	172.547	200	0.80136	0.0972437	TRUE	2.16541	0.262769
AndeanUrban_R2-12_Full_complete	mean_ACItf	54	2.706e+06	3528.38	200	414281	14.1925	FALSE	1735.46	0.0594538
AndeanUrban_R2-12_Full_complete	mean_ACIft	54	3.08417e+08	3528.38	200	5.06253e+07	191.502	FALSE	16833.3	0.0636758
AndeanUrban_R2-12_Full_complete	mean_NP	54	0.261437	211.768	200	0.0446145	0.0150495	FALSE	0.531902	0.179422
AndeanUrban_R2-12_Full_complete	median_ACItf	54	2.7886e+06	3528.38	200	387126	13.4156	FALSE	1558.87	0.0540218
AndeanUrban_R2-12_Full_complete	median_ACIft	54	3.73965e+08	3528.38	200	7.19917e+07	272.953	FALSE	17969.1	0.0681289
AndeanUrban_R2-12_Full_complete	median_NP	54	0.196737	3528.38	200	0.078559	0.0279091	FALSE	0.652515	0.231814
AndeanUrban_R2-12_Dawn_complete	mean_ACItf	54	3.33884e+06	3528.38	200	433840	14.6987	FALSE	2221.06	0.0752506
AndeanUrban_R2-12_Dawn_complete	mean_ACIft	54	3.74152e+08	3528.38	200	5.19867e+07	196.943	FALSE	17937.9	0.0679546
AndeanUrban_R2-12_Dawn_complete	mean_NP	54	0.395349	0.0134508	200	0.100933	0.0296946	FALSE	0.718621	0.211418
AndeanUrban_R2-12_Dawn_complete	median_ACItf	54	4.13399e+06	3528.38	200	821804	27.9969	FALSE	2752.25	0.0937626
AndeanUrban_R2-12_Dawn_complete	median_ACIft	54	4.12308e+08	3528.38	200	5.95941e+07	225.433	FALSE	18573.9	0.0702613
AndeanUrban_R2-12_Dawn_complete	median_NP	54	0.23024	0.0181316	200	0.10385	0.0315051	FALSE	0.829345	0.251599
AndeanUrban_R2-12_Evening_complete	mean_ACItf	54	2.57682e+06	1604.02	200	494049	16.4579	FALSE	1942.13	0.064697
AndeanUrban_R2-12_Evening_complete	mean_ACIft	54	2.72582e+08	3528.38	200	4.40032e+07	162.786	FALSE	15583.2	0.0576488
AndeanUrban_R2-12_Evening_complete	mean_NP	54	0.331748	241.513	200	0.068179	0.0216886	FALSE	0.615132	0.195681
AndeanUrban_R2-12_Evening_complete	median_ACItf	54	2.25689e+06	1762.7	200	513843	17.2421	FALSE	1742.05	0.0584549
AndeanUrban_R2-12_Evening_complete	median_ACIft	54	2.84881e+08	3528.38	200	5.18791e+07	191.843	FALSE	15694.4	0.058036
AndeanUrban_R2-12_Evening_complete	median_NP	54	0.212208	1195.78	200	0.0944616	0.0313903	FALSE	0.723715	0.240496
AndeanUrban_R12-24_Full_complete	mean_ACItf	54	4.63409e+06	258.788	200	1.12787e+06	30.0199	FALSE	2723.36	0.0724859
AndeanUrban_R12-24_Full_complete	mean_ACIft	54	1.48714e+08	1512.03	200	2.95369e+07	90.2629	FALSE	14840.5	0.0453517
AndeanUrban_R12-24_Full_complete	mean_NP	54	0.736141	57.5683	200	0.120895	0.034002	FALSE	0.904815	0.254481
AndeanUrban_R12-24_Full_complete	median_ACItf	54	4.57837e+06	113.215	200	1.12932e+06	30.7311	FALSE	2474.39	0.0673332
AndeanUrban_R12-24_Full_complete	median_ACIft	54	2.06117e+08	3420.59	200	2.72817e+07	83.6321	FALSE	13670.6	0.0419074
AndeanUrban_R12-24_Full_complete	median_NP	54	0.607815	297.798	200	0.202874	0.0612022	FALSE	1.01563	0.306392
AndeanUrban_R12-24_Dawn_complete	mean_ACItf	54	5.71774e+06	29.7156	200	1.4972e+06	40.4433	FALSE	4203.42	0.113545
AndeanUrban_R12-24_Dawn_complete	mean_ACIft	54	2.1093e+08	3528.38	200	3.83499e+07	119.183	FALSE	15609.4	0.0485104
AndeanUrban_R12-24_Dawn_complete	mean_NP	54	1.33748	870.76	200	0.252064	0.0691441	FALSE	1.19987	0.329137
AndeanUrban_R12-24_Dawn_complete	median_ACItf	54	5.54485e+06	61.7871	200	1.67061e+06	45.6135	FALSE	5304.24	0.144824
AndeanUrban_R12-24_Dawn_complete	median_ACIft	54	2.33334e+08	3528.38	200	3.98343e+07	123.765	FALSE	14875.5	0.0462178
AndeanUrban_R12-24_Dawn_complete	median_NP	54	1.59523	1256.62	200	0.372861	0.110025	FALSE	1.50188	0.443177
AndeanUrban_R12-24_Evening_complete	mean_ACItf	54	6.47302e+06	1390.67	200	1.41676e+06	36.9176	FALSE	2948.63	0.0768345
AndeanUrban_R12-24_Evening_complete	mean_ACIft	54	1.38349e+08	0.468636	200	3.18494e+07	96.2053	FALSE	13778.7	0.0416204
AndeanUrban_R12-24_Evening_complete	mean_NP	54	0.745425	670.94	200	0.111664	0.0291843	FALSE	0.976171	0.255131
AndeanUrban_R12-24_Evening_complete	median_ACItf	54	6.77704e+06	1175.72	200	1.58722e+06	41.9434	FALSE	2910.04	0.0768996
AndeanUrban_R12-24_Evening_complete	median_ACIft	54	1.64121e+08	572.508	200	3.80793e+07	115.134	FALSE	13097.8	0.0396015
AndeanUrban_R12-24_Evening_complete	median_NP	54	0.90182	2540.52	200	0.186547	0.0508765	FALSE	1.11784	0.304866
Plains_R0-2_Full_complete	mean_ACItf	96	208643	2031.36	200	18634.1	2.98368	TRUE	619.711	0.0992279
Plains_R0-2_Full_complete	mean_ACIft	96	7.20761e+06	825.875	200	923987	16.8624	TRUE	3375.5	0.0616016
Plains_R0-2_Full_complete	mean_BI	96	0.0534175	74.7594	200	0.0048691	0.00583486	TRUE	0.2426	0.290719
Plains_R0-2_Full_complete	mean_NP	96	0.00378809	1872.23	200	0.000263007	0.000244647	TRUE	0.0806268	0.0749985
Plains_R0-2_Full_complete	mean_NDSI	96	0.0674547	1601.51	200	0.0037012	0.00763201	TRUE	0.250059	0.515631
Plains_R0-2_Full_complete	median_ACItf	96	193541	2031.36	200	24070.2	3.9923	TRUE	655.001	0.108639
Plains_R0-2_Full_complete	median_ACIft	96	7.90309e+06	18.8389	200	1.04065e+06	19.3198	TRUE	3650.38	0.0677701
Plains_R0-2_Full_complete	median_BI	96	0.0703731	167.833	200	0.00390679	0.00528159	TRUE	0.268371	0.362811
Plains_R0-2_Full_complete	median_NP	96	1.30335e-07	2031.36	200	9.001e-08	8.95437e-08	TRUE	0.0512989	0.0510331
Plains_R0-2_Full_complete	median_NDSI	96	0.0728688	2031.36	200	0.00417872	0.00698419	TRUE	0.280463	0.468758
Plains_R0-2_Dawn_complete	mean_ACItf	91	255824	2023.93	200	31584.5	5.18145	TRUE	681.108	0.111736
Plains_R0-2_Dawn_complete	mean_ACIft	91	7.12323e+06	2023.93	200	852610	15.6105	TRUE	3677.48	0.0673315
Plains_R0-2_Dawn_complete	mean_BI	91	0.0473378	213.842	200	0.00329677	0.00419134	TRUE	0.23137	0.294152
Plains_R0-2_Dawn_complete	mean_NP	91	0.011804	986.957	200	0.00114182	0.000981057	TRUE	0.112638	0.0967791
Plains_R0-2_Dawn_complete	mean_NDSI	91	0.0497642	718.581	200	0.00387878	0.00699276	TRUE	0.227242	0.409678
Plains_R0-2_Dawn_complete	median_ACItf	91	260899	2023.93	200	34838.3	5.91522	TRUE	734.577	0.124724
Plains_R0-2_Dawn_complete	median_ACIft	91	9.02968e+06	2023.93	200	1.27644e+06	23.8081	TRUE	4345.36	0.0810497
Plains_R0-2_Dawn_complete	median_BI	91	0.0631216	598.241	200	0.00596044	0.00810596	TRUE	0.254768	0.346474
Plains_R0-2_Dawn_complete	median_NP	91	8.13449e-07	2023.93	200	4.66393e-07	4.61323e-07	TRUE	0.105409	0.104264
Plains_R0-2_Dawn_complete	median_NDSI	91	0.0595747	102.856	200	0.00502634	0.0077163	TRUE	0.2636	0.404671
Plains_R0-2_Evening_complete	mean_ACItf	91	247084	1143.37	200	32358.6	5.06068	TRUE	650.681	0.101762
Plains_R0-2_Evening_complete	mean_ACIft	91	6.76811e+06	75.6825	200	1.03808e+06	19.5183	TRUE	3149.28	0.0592136
Plains_R0-2_Evening_complete	mean_BI	91	0.150287	10.111	200	0.0184039	0.0133118	TRUE	0.402356	0.29103
Plains_R0-2_Evening_complete	mean_NP	91	0.0183981	84.6577	200	0.00243243	0.00238687	TRUE	0.153465	0.15059
Plains_R0-2_Evening_complete	mean_NDSI	91	0.0380392	60.0494	200	0.00571458	0.00830822	TRUE	0.267197	0.388468
Plains_R0-2_Evening_complete	median_ACItf	91	243549	2023.07	200	28405.3	4.54176	TRUE	682.782	0.109171
Plains_R0-2_Evening_complete	median_ACIft	91	8.3533e+06	2023.07	200	1.23973e+06	23.6752	TRUE	3341.6	0.0638146
Plains_R0-2_Evening_complete	median_BI	91	0.183419	525.523	200	0.0173557	0.0131768	TRUE	0.438494	0.332912
Plains_R0-2_Evening_complete	median_NP	91	7.94615e-07	2023.07	200	5.33935e-07	5.28131e-07	TRUE	0.105409	0.104264
Plains_R0-2_Evening_complete	median_NDSI	91	0.0328368	0.00150361	200	0.0077216	0.0100009	TRUE	0.326271	0.422582
Plains_R0-24_Full_complete	mean_ACItf	96	5.52125e+07	2031.36	200	5.46028e+06	76.0809	TRUE	9842.78	0.137145
Plains_R0-24_Full_complete	mean_ACIft	96	2.32504e+09	2031.36	200	2.42961e+08	389.236	TRUE	70696	0.113259
Plains_R0-24_Full_complete	mean_NP	96	1.92377	2031.36	200	0.132404	0.0151655	TRUE	1.58958	0.18207
Plains_R0-24_Full_complete	median_ACItf	96	5.31994e+07	2031.36	200	4.78946e+06	67.86	TRUE	11156.9	0.158077
Plains_R0-24_Full_complete	median_ACIft	96	2.42872e+09	556.976	200	3.46891e+08	554.273	TRUE	85608.5	0.136788
Plains_R0-24_Full_complete	median_NP	96	1.41767	25.8956	200	0.148128	0.0171226	TRUE	1.7631	0.203803
Plains_R0-24_Dawn_complete	mean_ACItf	91	7.8406e+07	1950.29	200	9.37142e+06	131.763	TRUE	11418	0.160538
Plains_R0-24_Dawn_complete	mean_ACIft	91	2.33006e+09	0.138341	200	3.78491e+08	622.68	TRUE	76309.5	0.125542
Plains_R0-24_Dawn_complete	mean_NP	91	2.7016	2023.93	200	0.356349	0.0389164	TRUE	1.87374	0.204628
Plains_R0-24_Dawn_complete	median_ACItf	91	8.27516e+07	59.9158	200	8.598e+06	122.756	TRUE	12677.1	0.180994
Plains_R0-24_Dawn_complete	median_ACIft	91	2.55481e+09	2023.93	200	3.67735e+08	604.297	TRUE	88160.4	0.144874
Plains_R0-24_Dawn_complete	median_NP	91	2.68575	2023.93	200	0.32882	0.0367149	TRUE	1.99654	0.222927
Plains_R0-24_Evening_complete	mean_ACItf	91	5.39581e+07	40.6429	200	6.60393e+06	87.0813	TRUE	10144.6	0.13377
Plains_R0-24_Evening_complete	mean_ACIft	91	1.73739e+09	10.2809	200	3.18171e+08	485.302	TRUE	71784.6	0.109492
Plains_R0-24_Evening_complete	mean_NP	91	1.64751	2023.07	200	0.204687	0.0231483	TRUE	1.55244	0.175567
Plains_R0-24_Evening_complete	median_ACItf	91	5.80447e+07	11.5439	200	8.97534e+06	120.364	TRUE	12386.4	0.166108
Plains_R0-24_Evening_complete	median_ACIft	91	2.02475e+09	66.4296	200	4.51802e+08	687.936	TRUE	94315.7	0.14361
Plains_R0-24_Evening_complete	median_NP	91	1.17341	1986.83	200	0.215846	0.0248161	TRUE	1.84484	0.212104
Plains_R2-12_Full_complete	mean_ACItf	96	4.90591e+06	78.9919	200	372480	13.5427	FALSE	3366.11	0.122386
Plains_R2-12_Full_complete	mean_ACIft	96	7.52693e+08	2031.36	200	4.97514e+07	202.015	FALSE	32627.5	0.132484
Plains_R2-12_Full_complete	mean_NP	96	0.365813	2031.36	200	0.0329326	0.00970066	FALSE	0.689458	0.203087
Plains_R2-12_Full_complete	median_ACItf	96	5.10644e+06	2031.36	200	440978	16.2304	FALSE	3874.23	0.142593
Plains_R2-12_Full_complete	median_ACIft	96	9.10838e+08	40.0499	200	6.78234e+07	275.009	FALSE	38910.2	0.157772
Plains_R2-12_Full_complete	median_NP	96	0.17895	115.092	200	0.0303677	0.0091103	FALSE	0.833629	0.250089
Plains_R2-12_Dawn_complete	mean_ACItf	91	5.47932e+06	56.5254	200	611556	22.4137	FALSE	3573.9	0.130984
Plains_R2-12_Dawn_complete	mean_ACIft	91	5.98163e+08	84.2927	200	6.97751e+07	289.756	FALSE	32106.9	0.13333
Plains_R2-12_Dawn_complete	mean_NP	91	0.474984	755.604	200	0.0687573	0.0197605	FALSE	0.837682	0.240745
Plains_R2-12_Dawn_complete	median_ACItf	91	5.05442e+06	28.8265	200	658354	24.5928	FALSE	4010.4	0.149808
Plains_R2-12_Dawn_complete	median_ACIft	91	6.14839e+08	500.769	200	7.46265e+07	310.411	FALSE	36990.8	0.153864
Plains_R2-12_Dawn_complete	median_NP	91	0.395308	2023.93	200	0.0709517	0.0214149	FALSE	0.976193	0.294639
Plains_R2-12_Evening_complete	mean_ACItf	91	3.85436e+06	45.5784	200	797227	26.9168	FALSE	3189.12	0.107675
Plains_R2-12_Evening_complete	mean_ACIft	91	5.75155e+08	36.7121	200	7.98059e+07	297.705	FALSE	32027.2	0.119473
Plains_R2-12_Evening_complete	mean_NP	91	0.315337	98.6434	200	0.0467828	0.0132883	FALSE	0.709489	0.201525
Plains_R2-12_Evening_complete	median_ACItf	91	3.98536e+06	6.51658	200	677827	23.3162	FALSE	4080.43	0.140361
Plains_R2-12_Evening_complete	median_ACIft	91	6.56836e+08	39.1474	200	8.30274e+07	309.216	FALSE	40982.5	0.152629
Plains_R2-12_Evening_complete	median_NP	91	0.198186	22.9289	200	0.0447077	0.0129981	FALSE	0.847412	0.246372
Plains_R12-24_Full_complete	mean_ACItf	96	3.55951e+07	44.7547	200	4.07186e+06	104.205	FALSE	7211.86	0.184562
Plains_R12-24_Full_complete	mean_ACIft	96	7.5117e+08	2031.36	200	7.33045e+07	233.263	FALSE	40686.4	0.129469
Plains_R12-24_Full_complete	mean_NP	96	0.767706	2031.36	200	0.0633304	0.0166417	FALSE	0.943421	0.247908
Plains_R12-24_Full_complete	median_ACItf	96	3.37551e+07	2031.36	200	3.39476e+06	88.9411	FALSE	7847.86	0.20561
Plains_R12-24_Full_complete	median_ACIft	96	8.62292e+08	2031.36	200	9.60341e+07	303.558	FALSE	50347.5	0.159146
Plains_R12-24_Full_complete	median_NP	96	0.583209	2031.36	200	0.0589885	0.0162727	FALSE	1.06435	0.293612
Plains_R12-24_Dawn_complete	mean_ACItf	91	5.2081e+07	149.286	200	6.44278e+06	166.135	FALSE	8639.91	0.222791
Plains_R12-24_Dawn_complete	mean_ACIft	91	9.21638e+08	1479.87	200	1.16578e+08	383.995	FALSE	45688.2	0.150492
Plains_R12-24_Dawn_complete	mean_NP	91	0.917776	515.99	200	0.119226	0.0294711	FALSE	1.03631	0.256164
Plains_R12-24_Dawn_complete	median_ACItf	91	5.50415e+07	28.1459	200	6.33025e+06	166.618	FALSE	9407.29	0.247609
Plains_R12-24_Dawn_complete	median_ACIft	91	1.24393e+09	2023.93	200	1.42822e+08	468.046	FALSE	54299.7	0.177947
Plains_R12-24_Dawn_complete	median_NP	91	0.749827	21.3421	200	0.145805	0.0376939	FALSE	1.15133	0.297645
Plains_R12-24_Evening_complete	mean_ACItf	91	3.92126e+07	67.5959	200	4.16162e+06	101.618	FALSE	7747.87	0.189187
Plains_R12-24_Evening_complete	mean_ACIft	91	5.26875e+08	136.72	200	8.81777e+07	271.025	FALSE	41997.1	0.129083
Plains_R12-24_Evening_complete	mean_NP	91	0.774232	2023.07	200	0.0954409	0.0245033	FALSE	0.959641	0.246376
Plains_R12-24_Evening_complete	median_ACItf	91	4.16892e+07	20.0521	200	6.00063e+06	149.586	FALSE	9017.23	0.224785
Plains_R12-24_Evening_complete	median_ACIft	91	5.75836e+08	32.6094	200	1.27239e+08	388.278	FALSE	54658.9	0.166795
Plains_R12-24_Evening_complete	median_NP	91	0.75128	2023.07	200	0.151878	0.0403531	FALSE	1.16915	0.310637

## Sheet: METADATA
VARIABLE	DESCRIPTION
GeoJSON	Name of the GeoJSON file used for spatial analysis containing the sampling arrangement.
Variable	Combination of statistic (median, mean) and calculated acoustic index
Num_Points	Total number of available sampling points in the full dataset.
Sill	Variogram sill value from spatial interpolation model (kriging).
Nugget	Nugget effect from the variogram model, representing small-scale or measurement noise.
Range	Interpolation range, corresponding the distance of 200m
Empiric_RMSE	Empirical root mean square error between interpolated and true surface using full sample.
Empiric_RMSE_Relative	Empirical RMSE expressed as a percentage relative to the magnitude of the index.
Calculate_NDSI_BI	Logical value indicating whether NDSI or BI were derived. This is because both indices are calculated only for specific frequency ranges. See SUPPLEMENTARY INFORMATION S2.
RMSE_theoretical	Theoretical RMSE from the fitted variogram model.
RMSE_Relative_theoretical	Theoretical RMSE relative to the index's magnitude.
