# Supplementary material for: A workflow to optimize spatial sampling in ecoacoustic studies
Source: Research Square preprint supplement (doi:10.21203/rs.3.rs-7207339/v1), 2025-10-10
Supplement: Supplementary file 16 [file DF2_SampleSize_vs_Subsample_performance_Correlations(Pcoeff2).xlsx]

## Sheet: DATA
parameter1	parameter2	effectsize	estimate	conf.level	conf.low	conf.high	statistic	df.error	p.value	method	n.obs	conf.method	Locality	Type	Frequency_Range	Time_Period	Statistic	Index	Subsample	Statistical_paradigm
Sample_percent	Subsample_accuracy	Pearson correlation	0.999543	0.95			33.0532	1	0.0192546	Pearson correlation	3	normal	ALL	Tessells	R12-24	Full	mean	ACItf	SLIC	Frequentist
Sample_percent	Subsample_accuracy	Pearson correlation	0.845357	0.95			1.58247	1	0.358776	Pearson correlation	3	normal	ALL	Tessells	R12-24	Full	mean	ACIft	SLIC	Frequentist
Sample_percent	Subsample_accuracy	Pearson correlation	0.673799	0.95			0.911877	1	0.529323	Pearson correlation	3	normal	ALL	Tessells	R12-24	Full	mean	NP	SLIC	Frequentist
Sample_percent	Subsample_accuracy	Pearson correlation	0.937812	0.95			2.70152	1	0.225696	Pearson correlation	3	normal	ALL	Tessells	R12-24	Full	median	ACItf	SLIC	Frequentist
Sample_percent	Subsample_accuracy	Pearson correlation	0.999526	0.95			32.4744	1	0.0195976	Pearson correlation	3	normal	ALL	Tessells	R12-24	Full	median	ACIft	SLIC	Frequentist
Sample_percent	Subsample_accuracy	Pearson correlation	0.956207	0.95			3.26694	1	0.189102	Pearson correlation	3	normal	ALL	Tessells	R12-24	Full	median	NP	SLIC	Frequentist
Sample_percent	Subsample_accuracy	Pearson correlation	0.809341	0.95			1.37798	1	0.399649	Pearson correlation	3	normal	ALL	Tessells	R12-24	Dawn	mean	ACItf	SLIC	Frequentist
Sample_percent	Subsample_accuracy	Pearson correlation	0.774049	0.95			1.22258	1	0.436457	Pearson correlation	3	normal	ALL	Tessells	R12-24	Dawn	mean	ACIft	SLIC	Frequentist
Sample_percent	Subsample_accuracy	Pearson correlation	0.993419	0.95			8.67366	1	0.0730743	Pearson correlation	3	normal	ALL	Tessells	R12-24	Dawn	mean	NP	SLIC	Frequentist
Sample_percent	Subsample_accuracy	Pearson correlation	0.916775	0.95			2.29535	1	0.261566	Pearson correlation	3	normal	ALL	Tessells	R12-24	Dawn	median	ACItf	SLIC	Frequentist
Sample_percent	Subsample_accuracy	Pearson correlation	0.985544	0.95			5.81718	1	0.108379	Pearson correlation	3	normal	ALL	Tessells	R12-24	Dawn	median	ACIft	SLIC	Frequentist
Sample_percent	Subsample_accuracy	Pearson correlation	0.955669	0.95			3.24567	1	0.190269	Pearson correlation	3	normal	ALL	Tessells	R12-24	Dawn	median	NP	SLIC	Frequentist
Sample_percent	Subsample_accuracy	Pearson correlation	0.946743	0.95			2.9403	1	0.208703	Pearson correlation	3	normal	ALL	Tessells	R12-24	Evening	mean	ACItf	SLIC	Frequentist
Sample_percent	Subsample_accuracy	Pearson correlation	0.918746	0.95			2.32683	1	0.258406	Pearson correlation	3	normal	ALL	Tessells	R12-24	Evening	mean	ACIft	SLIC	Frequentist
Sample_percent	Subsample_accuracy	Pearson correlation	0.848424	0.95			1.60287	1	0.355103	Pearson correlation	3	normal	ALL	Tessells	R12-24	Evening	mean	NP	SLIC	Frequentist
Sample_percent	Subsample_accuracy	Pearson correlation	0.999046	0.95			22.8814	1	0.0278049	Pearson correlation	3	normal	ALL	Tessells	R12-24	Evening	median	ACItf	SLIC	Frequentist
Sample_percent	Subsample_accuracy	Pearson correlation	0.997023	0.95			12.9306	1	0.0491358	Pearson correlation	3	normal	ALL	Tessells	R12-24	Evening	median	ACIft	SLIC	Frequentist
Sample_percent	Subsample_accuracy	Pearson correlation	0.806939	0.95			1.36622	1	0.402245	Pearson correlation	3	normal	ALL	Tessells	R12-24	Evening	median	NP	SLIC	Frequentist
Sample_percent	Subsample_accuracy	Pearson correlation	0.86367	0.95			1.71343	1	0.336321	Pearson correlation	3	normal	ALL	Tessells	R0-2	Evening	mean	ACItf	SLIC	Frequentist
Sample_percent	Subsample_accuracy	Pearson correlation	0.656438	0.95			0.870169	1	0.544125	Pearson correlation	3	normal	ALL	Tessells	R0-2	Evening	mean	ACIft	SLIC	Frequentist
Sample_percent	Subsample_accuracy	Pearson correlation	0.873566	0.95			1.79486	1	0.323603	Pearson correlation	3	normal	ALL	Tessells	R0-2	Evening	mean	BI	SLIC	Frequentist
Sample_percent	Subsample_accuracy	Pearson correlation	0.622782	0.95			0.795994	1	0.572004	Pearson correlation	3	normal	ALL	Tessells	R0-2	Evening	mean	NP	SLIC	Frequentist
Sample_percent	Subsample_accuracy	Pearson correlation	0.913932	0.95			2.2518	1	0.266061	Pearson correlation	3	normal	ALL	Tessells	R0-2	Evening	mean	NDSI	SLIC	Frequentist
Sample_percent	Subsample_accuracy	Pearson correlation	0.900118	0.95			2.06617	1	0.28696	Pearson correlation	3	normal	ALL	Tessells	R0-2	Evening	median	ACItf	SLIC	Frequentist
Sample_percent	Subsample_accuracy	Pearson correlation	0.640908	0.95			0.834932	1	0.557116	Pearson correlation	3	normal	ALL	Tessells	R0-2	Evening	median	ACIft	SLIC	Frequentist
Sample_percent	Subsample_accuracy	Pearson correlation	0.956076	0.95			3.26172	1	0.189387	Pearson correlation	3	normal	ALL	Tessells	R0-2	Evening	median	BI	SLIC	Frequentist
Sample_percent	Subsample_accuracy	Pearson correlation	0.987767	0.95			6.33445	1	0.0996786	Pearson correlation	3	normal	ALL	Tessells	R0-2	Evening	median	NDSI	SLIC	Frequentist
Sample_percent	Subsample_accuracy	Pearson correlation	0.942725	0.95			2.82615	1	0.216508	Pearson correlation	3	normal	ALL	Tessells	R0-24	Full	mean	ACItf	SLIC	Frequentist
Sample_percent	Subsample_accuracy	Pearson correlation	0.994483	0.95			9.48083	1	0.0669007	Pearson correlation	3	normal	ALL	Tessells	R0-24	Full	mean	ACIft	SLIC	Frequentist
Sample_percent	Subsample_accuracy	Pearson correlation	0.759484	0.95			1.16749	1	0.450903	Pearson correlation	3	normal	ALL	Tessells	R0-24	Full	mean	NP	SLIC	Frequentist
Sample_percent	Subsample_accuracy	Pearson correlation	0.795773	0.95			1.31404	1	0.41413	Pearson correlation	3	normal	ALL	Tessells	R0-24	Full	median	ACItf	SLIC	Frequentist
Sample_percent	Subsample_accuracy	Pearson correlation	0.861802	0.95			1.69899	1	0.338672	Pearson correlation	3	normal	ALL	Tessells	R0-24	Full	median	ACIft	SLIC	Frequentist
Sample_percent	Subsample_accuracy	Pearson correlation	0.609805	0.95			0.769421	1	0.582495	Pearson correlation	3	normal	ALL	Tessells	R0-24	Full	median	NP	SLIC	Frequentist
Sample_percent	Subsample_accuracy	Pearson correlation	0.996592	0.95			12.0824	1	0.0525698	Pearson correlation	3	normal	ALL	Tessells	R0-24	Dawn	mean	ACItf	SLIC	Frequentist
Sample_percent	Subsample_accuracy	Pearson correlation	0.985366	0.95			5.78091	1	0.109045	Pearson correlation	3	normal	ALL	Tessells	R0-24	Dawn	mean	ACIft	SLIC	Frequentist
Sample_percent	Subsample_accuracy	Pearson correlation	0.996848	0.95			12.5643	1	0.0505623	Pearson correlation	3	normal	ALL	Tessells	R0-24	Dawn	mean	NP	SLIC	Frequentist
Sample_percent	Subsample_accuracy	Pearson correlation	0.983719	0.95			5.4738	1	0.115035	Pearson correlation	3	normal	ALL	Tessells	R0-24	Dawn	median	ACItf	SLIC	Frequentist
Sample_percent	Subsample_accuracy	Pearson correlation	0.926293	0.95			2.45829	1	0.245954	Pearson correlation	3	normal	ALL	Tessells	R0-24	Dawn	median	ACIft	SLIC	Frequentist
Sample_percent	Subsample_accuracy	Pearson correlation	0.978964	0.95			4.79803	1	0.130811	Pearson correlation	3	normal	ALL	Tessells	R0-24	Dawn	median	NP	SLIC	Frequentist
Sample_percent	Subsample_accuracy	Pearson correlation	0.795331	0.95			1.31205	1	0.414594	Pearson correlation	3	normal	ALL	Tessells	R2-12	Full	mean	ACItf	SLIC	Frequentist
Sample_percent	Subsample_accuracy	Pearson correlation	0.849149	0.95			1.60777	1	0.354231	Pearson correlation	3	normal	ALL	Tessells	R2-12	Full	mean	ACIft	SLIC	Frequentist
Sample_percent	Subsample_accuracy	Pearson correlation	0.394433	0.95			0.429233	1	0.741882	Pearson correlation	3	normal	ALL	Tessells	R2-12	Full	mean	NP	SLIC	Frequentist
Sample_percent	Subsample_accuracy	Pearson correlation	0.667653	0.95			0.896814	1	0.534598	Pearson correlation	3	normal	ALL	Tessells	R2-12	Full	median	ACItf	SLIC	Frequentist
Sample_percent	Subsample_accuracy	Pearson correlation	0.812904	0.95			1.39579	1	0.395771	Pearson correlation	3	normal	ALL	Tessells	R2-12	Full	median	ACIft	SLIC	Frequentist
Sample_percent	Subsample_accuracy	Pearson correlation	0.973142	0.95			4.2273	1	0.147879	Pearson correlation	3	normal	ALL	Tessells	R2-12	Full	median	NP	SLIC	Frequentist
Sample_percent	Subsample_accuracy	Pearson correlation	0.971364	0.95			4.08831	1	0.152719	Pearson correlation	3	normal	ALL	Tessells	R0-24	Evening	mean	ACItf	SLIC	Frequentist
Sample_percent	Subsample_accuracy	Pearson correlation	0.997952	0.95			15.6025	1	0.0407467	Pearson correlation	3	normal	ALL	Tessells	R0-24	Evening	mean	ACIft	SLIC	Frequentist
Sample_percent	Subsample_accuracy	Pearson correlation	0.889826	0.95			1.95009	1	0.301651	Pearson correlation	3	normal	ALL	Tessells	R0-24	Evening	mean	NP	SLIC	Frequentist
Sample_percent	Subsample_accuracy	Pearson correlation	0.984423	0.95			5.59917	1	0.112513	Pearson correlation	3	normal	ALL	Tessells	R0-24	Evening	median	ACItf	SLIC	Frequentist
Sample_percent	Subsample_accuracy	Pearson correlation	0.916549	0.95			2.29182	1	0.261926	Pearson correlation	3	normal	ALL	Tessells	R0-24	Evening	median	ACIft	SLIC	Frequentist
Sample_percent	Subsample_accuracy	Pearson correlation	0.795384	0.95			1.31229	1	0.414538	Pearson correlation	3	normal	ALL	Tessells	R0-24	Evening	median	NP	SLIC	Frequentist
Sample_percent	Subsample_accuracy	Pearson correlation	0.846544	0.95			1.59029	1	0.357359	Pearson correlation	3	normal	ALL	Tessells	R2-12	Dawn	mean	ACItf	SLIC	Frequentist
Sample_percent	Subsample_accuracy	Pearson correlation	0.865865	0.95			1.73077	1	0.333538	Pearson correlation	3	normal	ALL	Tessells	R2-12	Dawn	mean	ACIft	SLIC	Frequentist
Sample_percent	Subsample_accuracy	Pearson correlation	0.869348	0.95			1.7591	1	0.329078	Pearson correlation	3	normal	ALL	Tessells	R2-12	Dawn	mean	NP	SLIC	Frequentist
Sample_percent	Subsample_accuracy	Pearson correlation	0.735924	0.95			1.08693	1	0.473496	Pearson correlation	3	normal	ALL	Tessells	R2-12	Dawn	median	ACItf	SLIC	Frequentist
Sample_percent	Subsample_accuracy	Pearson correlation	0.763581	0.95			1.18254	1	0.446879	Pearson correlation	3	normal	ALL	Tessells	R2-12	Dawn	median	ACIft	SLIC	Frequentist
Sample_percent	Subsample_accuracy	Pearson correlation	0.873662	0.95			1.79569	1	0.323478	Pearson correlation	3	normal	ALL	Tessells	R2-12	Dawn	median	NP	SLIC	Frequentist
Sample_percent	Subsample_accuracy	Pearson correlation	0.824879	0.95			1.45916	1	0.382487	Pearson correlation	3	normal	ALL	Tessells	R0-2	Full	mean	ACItf	SLIC	Frequentist
Sample_percent	Subsample_accuracy	Pearson correlation	0.999746	0.95			44.3271	1	0.0143594	Pearson correlation	3	normal	ALL	Tessells	R0-2	Full	mean	ACIft	SLIC	Frequentist
Sample_percent	Subsample_accuracy	Pearson correlation	-0.633166	0.95			-0.818026	1	0.56351	Pearson correlation	3	normal	ALL	Tessells	R0-2	Full	mean	BI	SLIC	Frequentist
Sample_percent	Subsample_accuracy	Pearson correlation	0.487841	0.95			0.558853	1	0.675569	Pearson correlation	3	normal	ALL	Tessells	R0-2	Full	mean	NP	SLIC	Frequentist
Sample_percent	Subsample_accuracy	Pearson correlation	0.652968	0.95			0.862134	1	0.547047	Pearson correlation	3	normal	ALL	Tessells	R0-2	Full	mean	NDSI	SLIC	Frequentist
Sample_percent	Subsample_accuracy	Pearson correlation	0.806359	0.95			1.36341	1	0.40287	Pearson correlation	3	normal	ALL	Tessells	R0-2	Full	median	ACItf	SLIC	Frequentist
Sample_percent	Subsample_accuracy	Pearson correlation	0.993485	0.95			8.71751	1	0.0727099	Pearson correlation	3	normal	ALL	Tessells	R0-2	Full	median	ACIft	SLIC	Frequentist
Sample_percent	Subsample_accuracy	Pearson correlation	0.929218	0.95			2.51457	1	0.240965	Pearson correlation	3	normal	ALL	Tessells	R0-2	Full	median	BI	SLIC	Frequentist
Sample_percent	Subsample_accuracy	Pearson correlation	0.867425	0.95			1.74333	1	0.331547	Pearson correlation	3	normal	ALL	Tessells	R0-2	Full	median	NDSI	SLIC	Frequentist
Sample_percent	Subsample_accuracy	Pearson correlation	0.98174	0.95			5.16091	1	0.121844	Pearson correlation	3	normal	ALL	Tessells	R2-12	Evening	mean	ACItf	SLIC	Frequentist
Sample_percent	Subsample_accuracy	Pearson correlation	0.975188	0.95			4.40505	1	0.142112	Pearson correlation	3	normal	ALL	Tessells	R2-12	Evening	mean	ACIft	SLIC	Frequentist
Sample_percent	Subsample_accuracy	Pearson correlation	0.539557	0.95			0.640843	1	0.637183	Pearson correlation	3	normal	ALL	Tessells	R2-12	Evening	mean	NP	SLIC	Frequentist
Sample_percent	Subsample_accuracy	Pearson correlation	0.869647	0.95			1.76158	1	0.328693	Pearson correlation	3	normal	ALL	Tessells	R2-12	Evening	median	ACItf	SLIC	Frequentist
Sample_percent	Subsample_accuracy	Pearson correlation	0.903442	0.95			2.10735	1	0.282064	Pearson correlation	3	normal	ALL	Tessells	R2-12	Evening	median	ACIft	SLIC	Frequentist
Sample_percent	Subsample_accuracy	Pearson correlation	0.814696	0.95			1.40492	1	0.393807	Pearson correlation	3	normal	ALL	Tessells	R2-12	Evening	median	NP	SLIC	Frequentist
Sample_percent	Subsample_accuracy	Pearson correlation	0.769772	0.95			1.20594	1	0.440739	Pearson correlation	3	normal	ALL	Tessells	R0-2	Dawn	mean	ACItf	SLIC	Frequentist
Sample_percent	Subsample_accuracy	Pearson correlation	0.668008	0.95			0.897674	1	0.534295	Pearson correlation	3	normal	ALL	Tessells	R0-2	Dawn	mean	ACIft	SLIC	Frequentist
Sample_percent	Subsample_accuracy	Pearson correlation	0.864043	0.95			1.71636	1	0.335848	Pearson correlation	3	normal	ALL	Tessells	R0-2	Dawn	mean	BI	SLIC	Frequentist
Sample_percent	Subsample_accuracy	Pearson correlation	0.546422	0.95			0.652436	1	0.631979	Pearson correlation	3	normal	ALL	Tessells	R0-2	Dawn	mean	NP	SLIC	Frequentist
Sample_percent	Subsample_accuracy	Pearson correlation	0.472353	0.95			0.535907	1	0.686809	Pearson correlation	3	normal	ALL	Tessells	R0-2	Dawn	mean	NDSI	SLIC	Frequentist
Sample_percent	Subsample_accuracy	Pearson correlation	0.77806	0.95			1.23858	1	0.432408	Pearson correlation	3	normal	ALL	Tessells	R0-2	Dawn	median	ACItf	SLIC	Frequentist
Sample_percent	Subsample_accuracy	Pearson correlation	0.761682	0.95			1.17552	1	0.448748	Pearson correlation	3	normal	ALL	Tessells	R0-2	Dawn	median	ACIft	SLIC	Frequentist
Sample_percent	Subsample_accuracy	Pearson correlation	0.878586	0.95			1.83964	1	0.316975	Pearson correlation	3	normal	ALL	Tessells	R0-2	Dawn	median	BI	SLIC	Frequentist
Sample_percent	Subsample_accuracy	Pearson correlation	0.722536	0.95			1.04513	1	0.485953	Pearson correlation	3	normal	ALL	Tessells	R0-2	Dawn	median	NDSI	SLIC	Frequentist
Sample_percent	Subsample_accuracy	Pearson correlation	0.729865	0.95			1.06769	1	0.479166	Pearson correlation	3	normal	ALL	Tessells	R12-24	Full	mean	ACItf	basins	Frequentist
Sample_percent	Subsample_accuracy	Pearson correlation	0.648337	0.95			0.851558	1	0.55093	Pearson correlation	3	normal	ALL	Tessells	R12-24	Full	mean	ACIft	basins	Frequentist
Sample_percent	Subsample_accuracy	Pearson correlation	0.741929	0.95			1.10657	1	0.467822	Pearson correlation	3	normal	ALL	Tessells	R12-24	Full	mean	NP	basins	Frequentist
Sample_percent	Subsample_accuracy	Pearson correlation	-0.10909	0.95			-0.109745	1	0.930413	Pearson correlation	3	normal	ALL	Tessells	R12-24	Full	median	ACItf	basins	Frequentist
Sample_percent	Subsample_accuracy	Pearson correlation	0.560084	0.95			0.676075	1	0.621538	Pearson correlation	3	normal	ALL	Tessells	R12-24	Full	median	ACIft	basins	Frequentist
Sample_percent	Subsample_accuracy	Pearson correlation	0.580025	0.95			0.712038	1	0.606086	Pearson correlation	3	normal	ALL	Tessells	R12-24	Full	median	NP	basins	Frequentist
Sample_percent	Subsample_accuracy	Pearson correlation	0.99506	0.95			10.023	1	0.0633065	Pearson correlation	3	normal	ALL	Tessells	R12-24	Dawn	mean	ACItf	basins	Frequentist
Sample_percent	Subsample_accuracy	Pearson correlation	0.835325	0.95			1.51945	1	0.370559	Pearson correlation	3	normal	ALL	Tessells	R12-24	Dawn	mean	ACIft	basins	Frequentist
Sample_percent	Subsample_accuracy	Pearson correlation	0.998232	0.95			16.7952	1	0.0378603	Pearson correlation	3	normal	ALL	Tessells	R12-24	Dawn	mean	NP	basins	Frequentist
Sample_percent	Subsample_accuracy	Pearson correlation	0.997901	0.95			15.4083	1	0.0412588	Pearson correlation	3	normal	ALL	Tessells	R12-24	Dawn	median	ACItf	basins	Frequentist
Sample_percent	Subsample_accuracy	Pearson correlation	0.937485	0.95			2.69373	1	0.226295	Pearson correlation	3	normal	ALL	Tessells	R12-24	Dawn	median	ACIft	basins	Frequentist
Sample_percent	Subsample_accuracy	Pearson correlation	0.965767	0.95			3.72292	1	0.167057	Pearson correlation	3	normal	ALL	Tessells	R12-24	Dawn	median	NP	basins	Frequentist
Sample_percent	Subsample_accuracy	Pearson correlation	0.474916	0.95			0.539658	1	0.684957	Pearson correlation	3	normal	ALL	Tessells	R12-24	Evening	mean	ACItf	basins	Frequentist
Sample_percent	Subsample_accuracy	Pearson correlation	0.586648	0.95			0.724398	1	0.600894	Pearson correlation	3	normal	ALL	Tessells	R12-24	Evening	mean	ACIft	basins	Frequentist
Sample_percent	Subsample_accuracy	Pearson correlation	0.970716	0.95			4.0408	1	0.154445	Pearson correlation	3	normal	ALL	Tessells	R12-24	Evening	mean	NP	basins	Frequentist
Sample_percent	Subsample_accuracy	Pearson correlation	0.158941	0.95			0.160988	1	0.898384	Pearson correlation	3	normal	ALL	Tessells	R12-24	Evening	median	ACItf	basins	Frequentist
Sample_percent	Subsample_accuracy	Pearson correlation	0.475657	0.95			0.540746	1	0.684421	Pearson correlation	3	normal	ALL	Tessells	R12-24	Evening	median	ACIft	basins	Frequentist
Sample_percent	Subsample_accuracy	Pearson correlation	0.644858	0.95			0.84372	1	0.553833	Pearson correlation	3	normal	ALL	Tessells	R12-24	Evening	median	NP	basins	Frequentist
Sample_percent	Subsample_accuracy	Pearson correlation	0.681516	0.95			0.931284	1	0.522642	Pearson correlation	3	normal	ALL	Tessells	R0-2	Evening	mean	ACItf	basins	Frequentist
Sample_percent	Subsample_accuracy	Pearson correlation	0.980023	0.95			4.92766	1	0.127462	Pearson correlation	3	normal	ALL	Tessells	R0-2	Evening	mean	ACIft	basins	Frequentist
Sample_percent	Subsample_accuracy	Pearson correlation	0.947813	0.95			2.97282	1	0.206577	Pearson correlation	3	normal	ALL	Tessells	R0-2	Evening	mean	BI	basins	Frequentist
Sample_percent	Subsample_accuracy	Pearson correlation	0.837115	0.95			1.5303	1	0.368481	Pearson correlation	3	normal	ALL	Tessells	R0-2	Evening	mean	NP	basins	Frequentist
Sample_percent	Subsample_accuracy	Pearson correlation	0.997863	0.95			15.2709	1	0.0416289	Pearson correlation	3	normal	ALL	Tessells	R0-2	Evening	mean	NDSI	basins	Frequentist
Sample_percent	Subsample_accuracy	Pearson correlation	0.697621	0.95			0.973695	1	0.508484	Pearson correlation	3	normal	ALL	Tessells	R0-2	Evening	median	ACItf	basins	Frequentist
Sample_percent	Subsample_accuracy	Pearson correlation	0.993461	0.95			8.7016	1	0.0728417	Pearson correlation	3	normal	ALL	Tessells	R0-2	Evening	median	ACIft	basins	Frequentist
Sample_percent	Subsample_accuracy	Pearson correlation	0.902387	0.95			2.09406	1	0.283627	Pearson correlation	3	normal	ALL	Tessells	R0-2	Evening	median	BI	basins	Frequentist
Sample_percent	Subsample_accuracy	Pearson correlation	0.963775	0.95			3.61347	1	0.171878	Pearson correlation	3	normal	ALL	Tessells	R0-2	Evening	median	NDSI	basins	Frequentist
Sample_percent	Subsample_accuracy	Pearson correlation	0.692697	0.95			0.96044	1	0.512845	Pearson correlation	3	normal	ALL	Tessells	R0-24	Full	mean	ACItf	basins	Frequentist
Sample_percent	Subsample_accuracy	Pearson correlation	0.599531	0.95			0.749084	1	0.590708	Pearson correlation	3	normal	ALL	Tessells	R0-24	Full	mean	ACIft	basins	Frequentist
Sample_percent	Subsample_accuracy	Pearson correlation	0.789038	0.95			1.28436	1	0.421158	Pearson correlation	3	normal	ALL	Tessells	R0-24	Full	mean	NP	basins	Frequentist
Sample_percent	Subsample_accuracy	Pearson correlation	0.497638	0.95			0.573722	1	0.668402	Pearson correlation	3	normal	ALL	Tessells	R0-24	Full	median	ACItf	basins	Frequentist
Sample_percent	Subsample_accuracy	Pearson correlation	0.573464	0.95			0.700004	1	0.611198	Pearson correlation	3	normal	ALL	Tessells	R0-24	Full	median	ACIft	basins	Frequentist
Sample_percent	Subsample_accuracy	Pearson correlation	0.873846	0.95			1.79729	1	0.323236	Pearson correlation	3	normal	ALL	Tessells	R0-24	Full	median	NP	basins	Frequentist
Sample_percent	Subsample_accuracy	Pearson correlation	0.999913	0.95			75.6963	1	0.00840969	Pearson correlation	3	normal	ALL	Tessells	R0-24	Dawn	mean	ACItf	basins	Frequentist
Sample_percent	Subsample_accuracy	Pearson correlation	0.998649	0.95			19.2206	1	0.0330919	Pearson correlation	3	normal	ALL	Tessells	R0-24	Dawn	mean	ACIft	basins	Frequentist
Sample_percent	Subsample_accuracy	Pearson correlation	0.999949	0.95			99.199	1	0.00641739	Pearson correlation	3	normal	ALL	Tessells	R0-24	Dawn	mean	NP	basins	Frequentist
Sample_percent	Subsample_accuracy	Pearson correlation	0.97302	0.95			4.21729	1	0.148217	Pearson correlation	3	normal	ALL	Tessells	R0-24	Dawn	median	ACItf	basins	Frequentist
Sample_percent	Subsample_accuracy	Pearson correlation	0.988199	0.95			6.45134	1	0.0979012	Pearson correlation	3	normal	ALL	Tessells	R0-24	Dawn	median	ACIft	basins	Frequentist
Sample_percent	Subsample_accuracy	Pearson correlation	0.876401	0.95			1.81984	1	0.319875	Pearson correlation	3	normal	ALL	Tessells	R0-24	Dawn	median	NP	basins	Frequentist
Sample_percent	Subsample_accuracy	Pearson correlation	0.714404	0.95			1.02097	1	0.493396	Pearson correlation	3	normal	ALL	Tessells	R2-12	Full	mean	ACItf	basins	Frequentist
Sample_percent	Subsample_accuracy	Pearson correlation	0.73555	0.95			1.08573	1	0.473848	Pearson correlation	3	normal	ALL	Tessells	R2-12	Full	mean	ACIft	basins	Frequentist
Sample_percent	Subsample_accuracy	Pearson correlation	0.875007	0.95			1.80746	1	0.321713	Pearson correlation	3	normal	ALL	Tessells	R2-12	Full	mean	NP	basins	Frequentist
Sample_percent	Subsample_accuracy	Pearson correlation	0.567134	0.95			0.688582	1	0.616105	Pearson correlation	3	normal	ALL	Tessells	R2-12	Full	median	ACItf	basins	Frequentist
Sample_percent	Subsample_accuracy	Pearson correlation	0.728081	0.95			1.06213	1	0.480825	Pearson correlation	3	normal	ALL	Tessells	R2-12	Full	median	ACIft	basins	Frequentist
Sample_percent	Subsample_accuracy	Pearson correlation	-0.288564	0.95			-0.301385	1	0.813644	Pearson correlation	3	normal	ALL	Tessells	R2-12	Full	median	NP	basins	Frequentist
Sample_percent	Subsample_accuracy	Pearson correlation	0.624872	0.95			0.800372	1	0.570302	Pearson correlation	3	normal	ALL	Tessells	R0-24	Evening	mean	ACItf	basins	Frequentist
Sample_percent	Subsample_accuracy	Pearson correlation	0.532592	0.95			0.629265	1	0.642436	Pearson correlation	3	normal	ALL	Tessells	R0-24	Evening	mean	ACIft	basins	Frequentist
Sample_percent	Subsample_accuracy	Pearson correlation	0.86238	0.95			1.70343	1	0.337946	Pearson correlation	3	normal	ALL	Tessells	R0-24	Evening	mean	NP	basins	Frequentist
Sample_percent	Subsample_accuracy	Pearson correlation	0.44013	0.95			0.490158	1	0.709865	Pearson correlation	3	normal	ALL	Tessells	R0-24	Evening	median	ACItf	basins	Frequentist
Sample_percent	Subsample_accuracy	Pearson correlation	0.464081	0.95			0.523917	1	0.692769	Pearson correlation	3	normal	ALL	Tessells	R0-24	Evening	median	ACIft	basins	Frequentist
Sample_percent	Subsample_accuracy	Pearson correlation	0.626225	0.95			0.803221	1	0.569198	Pearson correlation	3	normal	ALL	Tessells	R0-24	Evening	median	NP	basins	Frequentist
Sample_percent	Subsample_accuracy	Pearson correlation	0.829967	0.95			1.48789	1	0.376719	Pearson correlation	3	normal	ALL	Tessells	R2-12	Dawn	mean	ACItf	basins	Frequentist
Sample_percent	Subsample_accuracy	Pearson correlation	0.96495	0.95			3.67693	1	0.16905	Pearson correlation	3	normal	ALL	Tessells	R2-12	Dawn	mean	ACIft	basins	Frequentist
Sample_percent	Subsample_accuracy	Pearson correlation	0.981295	0.95			5.09733	1	0.123327	Pearson correlation	3	normal	ALL	Tessells	R2-12	Dawn	mean	NP	basins	Frequentist
Sample_percent	Subsample_accuracy	Pearson correlation	0.59414	0.95			0.738647	1	0.594985	Pearson correlation	3	normal	ALL	Tessells	R2-12	Dawn	median	ACItf	basins	Frequentist
Sample_percent	Subsample_accuracy	Pearson correlation	0.912087	0.95			2.22463	1	0.26894	Pearson correlation	3	normal	ALL	Tessells	R2-12	Dawn	median	ACIft	basins	Frequentist
Sample_percent	Subsample_accuracy	Pearson correlation	0.710295	0.95			1.00908	1	0.497123	Pearson correlation	3	normal	ALL	Tessells	R2-12	Dawn	median	NP	basins	Frequentist
Sample_percent	Subsample_accuracy	Pearson correlation	0.807543	0.95			1.36916	1	0.401594	Pearson correlation	3	normal	ALL	Tessells	R0-2	Full	mean	ACItf	basins	Frequentist
Sample_percent	Subsample_accuracy	Pearson correlation	0.999978	0.95			152.056	1	0.00418668	Pearson correlation	3	normal	ALL	Tessells	R0-2	Full	mean	ACIft	basins	Frequentist
Sample_percent	Subsample_accuracy	Pearson correlation	0.860886	0.95			1.692	1	0.33982	Pearson correlation	3	normal	ALL	Tessells	R0-2	Full	mean	BI	basins	Frequentist
Sample_percent	Subsample_accuracy	Pearson correlation	0.306208	0.95			0.321659	1	0.80188	Pearson correlation	3	normal	ALL	Tessells	R0-2	Full	mean	NP	basins	Frequentist
Sample_percent	Subsample_accuracy	Pearson correlation	0.957156	0.95			3.30539	1	0.187027	Pearson correlation	3	normal	ALL	Tessells	R0-2	Full	mean	NDSI	basins	Frequentist
Sample_percent	Subsample_accuracy	Pearson correlation	0.717115	0.95			1.02893	1	0.490925	Pearson correlation	3	normal	ALL	Tessells	R0-2	Full	median	ACItf	basins	Frequentist
Sample_percent	Subsample_accuracy	Pearson correlation	0.872318	0.95			1.78411	1	0.325231	Pearson correlation	3	normal	ALL	Tessells	R0-2	Full	median	ACIft	basins	Frequentist
Sample_percent	Subsample_accuracy	Pearson correlation	0.84932	0.95			1.60893	1	0.354025	Pearson correlation	3	normal	ALL	Tessells	R0-2	Full	median	BI	basins	Frequentist
Sample_percent	Subsample_accuracy	Pearson correlation	0.806961	0.95			1.36633	1	0.402221	Pearson correlation	3	normal	ALL	Tessells	R0-2	Full	median	NDSI	basins	Frequentist
Sample_percent	Subsample_accuracy	Pearson correlation	0.672019	0.95			0.907479	1	0.530855	Pearson correlation	3	normal	ALL	Tessells	R2-12	Evening	mean	ACItf	basins	Frequentist
Sample_percent	Subsample_accuracy	Pearson correlation	0.72397	0.95			1.04949	1	0.484631	Pearson correlation	3	normal	ALL	Tessells	R2-12	Evening	mean	ACIft	basins	Frequentist
Sample_percent	Subsample_accuracy	Pearson correlation	0.728285	0.95			1.06276	1	0.480636	Pearson correlation	3	normal	ALL	Tessells	R2-12	Evening	mean	NP	basins	Frequentist
Sample_percent	Subsample_accuracy	Pearson correlation	0.527726	0.95			0.621282	1	0.646089	Pearson correlation	3	normal	ALL	Tessells	R2-12	Evening	median	ACItf	basins	Frequentist
Sample_percent	Subsample_accuracy	Pearson correlation	0.635036	0.95			0.822071	1	0.561971	Pearson correlation	3	normal	ALL	Tessells	R2-12	Evening	median	ACIft	basins	Frequentist
Sample_percent	Subsample_accuracy	Pearson correlation	0.837961	0.95			1.53549	1	0.367495	Pearson correlation	3	normal	ALL	Tessells	R2-12	Evening	median	NP	basins	Frequentist
Sample_percent	Subsample_accuracy	Pearson correlation	0.956065	0.95			3.26128	1	0.189411	Pearson correlation	3	normal	ALL	Tessells	R0-2	Dawn	mean	ACItf	basins	Frequentist
Sample_percent	Subsample_accuracy	Pearson correlation	0.919947	0.95			2.34655	1	0.256463	Pearson correlation	3	normal	ALL	Tessells	R0-2	Dawn	mean	ACIft	basins	Frequentist
Sample_percent	Subsample_accuracy	Pearson correlation	0.999847	0.95			57.2478	1	0.0111193	Pearson correlation	3	normal	ALL	Tessells	R0-2	Dawn	mean	BI	basins	Frequentist
Sample_percent	Subsample_accuracy	Pearson correlation	0.927621	0.95			2.48345	1	0.2437	Pearson correlation	3	normal	ALL	Tessells	R0-2	Dawn	mean	NP	basins	Frequentist
Sample_percent	Subsample_accuracy	Pearson correlation	0.966969	0.95			3.79362	1	0.164081	Pearson correlation	3	normal	ALL	Tessells	R0-2	Dawn	mean	NDSI	basins	Frequentist
Sample_percent	Subsample_accuracy	Pearson correlation	0.968416	0.95			3.8839	1	0.160428	Pearson correlation	3	normal	ALL	Tessells	R0-2	Dawn	median	ACItf	basins	Frequentist
Sample_percent	Subsample_accuracy	Pearson correlation	0.76247	0.95			1.17843	1	0.447973	Pearson correlation	3	normal	ALL	Tessells	R0-2	Dawn	median	ACIft	basins	Frequentist
Sample_percent	Subsample_accuracy	Pearson correlation	0.977367	0.95			4.62005	1	0.135702	Pearson correlation	3	normal	ALL	Tessells	R0-2	Dawn	median	BI	basins	Frequentist
Sample_percent	Subsample_accuracy	Pearson correlation	0.919455	0.95			2.33843	1	0.25726	Pearson correlation	3	normal	ALL	Tessells	R0-2	Dawn	median	NDSI	basins	Frequentist
Sample_percent	Subsample_accuracy	Pearson correlation	0.918685	0.95			2.32583	1	0.258505	Pearson correlation	3	normal	ALL	Tessells	R12-24	Full	mean	ACItf	halfbasins	Frequentist
Sample_percent	Subsample_accuracy	Pearson correlation	0.822178	0.95			1.44437	1	0.385518	Pearson correlation	3	normal	ALL	Tessells	R12-24	Full	mean	ACIft	halfbasins	Frequentist
Sample_percent	Subsample_accuracy	Pearson correlation	0.815359	0.95			1.40833	1	0.393079	Pearson correlation	3	normal	ALL	Tessells	R12-24	Full	mean	NP	halfbasins	Frequentist
Sample_percent	Subsample_accuracy	Pearson correlation	0.877862	0.95			1.83303	1	0.317938	Pearson correlation	3	normal	ALL	Tessells	R12-24	Full	median	ACItf	halfbasins	Frequentist
Sample_percent	Subsample_accuracy	Pearson correlation	0.8145	0.95			1.40391	1	0.394023	Pearson correlation	3	normal	ALL	Tessells	R12-24	Full	median	ACIft	halfbasins	Frequentist
Sample_percent	Subsample_accuracy	Pearson correlation	0.711803	0.95			1.01342	1	0.495758	Pearson correlation	3	normal	ALL	Tessells	R12-24	Full	median	NP	halfbasins	Frequentist
Sample_percent	Subsample_accuracy	Pearson correlation	0.991494	0.95			7.61804	1	0.0830923	Pearson correlation	3	normal	ALL	Tessells	R12-24	Dawn	mean	ACItf	halfbasins	Frequentist
Sample_percent	Subsample_accuracy	Pearson correlation	0.910923	0.95			2.20788	1	0.270743	Pearson correlation	3	normal	ALL	Tessells	R12-24	Dawn	mean	ACIft	halfbasins	Frequentist
Sample_percent	Subsample_accuracy	Pearson correlation	0.996617	0.95			12.1259	1	0.0523825	Pearson correlation	3	normal	ALL	Tessells	R12-24	Dawn	mean	NP	halfbasins	Frequentist
Sample_percent	Subsample_accuracy	Pearson correlation	0.989813	0.95			6.9523	1	0.0909459	Pearson correlation	3	normal	ALL	Tessells	R12-24	Dawn	median	ACItf	halfbasins	Frequentist
Sample_percent	Subsample_accuracy	Pearson correlation	0.948286	0.95			2.9875	1	0.205632	Pearson correlation	3	normal	ALL	Tessells	R12-24	Dawn	median	ACIft	halfbasins	Frequentist
Sample_percent	Subsample_accuracy	Pearson correlation	0.981008	0.95			5.05764	1	0.12427	Pearson correlation	3	normal	ALL	Tessells	R12-24	Dawn	median	NP	halfbasins	Frequentist
Sample_percent	Subsample_accuracy	Pearson correlation	0.904124	0.95			2.11605	1	0.281049	Pearson correlation	3	normal	ALL	Tessells	R12-24	Evening	mean	ACItf	halfbasins	Frequentist
Sample_percent	Subsample_accuracy	Pearson correlation	0.827307	0.95			1.47273	1	0.379743	Pearson correlation	3	normal	ALL	Tessells	R12-24	Evening	mean	ACIft	halfbasins	Frequentist
Sample_percent	Subsample_accuracy	Pearson correlation	0.828189	0.95			1.47773	1	0.378742	Pearson correlation	3	normal	ALL	Tessells	R12-24	Evening	mean	NP	halfbasins	Frequentist
Sample_percent	Subsample_accuracy	Pearson correlation	0.872153	0.95			1.7827	1	0.325446	Pearson correlation	3	normal	ALL	Tessells	R12-24	Evening	median	ACItf	halfbasins	Frequentist
Sample_percent	Subsample_accuracy	Pearson correlation	0.780712	0.95			1.24936	1	0.429713	Pearson correlation	3	normal	ALL	Tessells	R12-24	Evening	median	ACIft	halfbasins	Frequentist
Sample_percent	Subsample_accuracy	Pearson correlation	0.782181	0.95			1.2554	1	0.428215	Pearson correlation	3	normal	ALL	Tessells	R12-24	Evening	median	NP	halfbasins	Frequentist
Sample_percent	Subsample_accuracy	Pearson correlation	0.80492	0.95			1.35649	1	0.404416	Pearson correlation	3	normal	ALL	Tessells	R0-2	Evening	mean	ACItf	halfbasins	Frequentist
Sample_percent	Subsample_accuracy	Pearson correlation	0.967892	0.95			3.8505	1	0.161761	Pearson correlation	3	normal	ALL	Tessells	R0-2	Evening	mean	ACIft	halfbasins	Frequentist
Sample_percent	Subsample_accuracy	Pearson correlation	0.455098	0.95			0.511093	1	0.699208	Pearson correlation	3	normal	ALL	Tessells	R0-2	Evening	mean	BI	halfbasins	Frequentist
Sample_percent	Subsample_accuracy	Pearson correlation	0.966574	0.95			3.76995	1	0.165066	Pearson correlation	3	normal	ALL	Tessells	R0-2	Evening	mean	NP	halfbasins	Frequentist
Sample_percent	Subsample_accuracy	Pearson correlation	0.836897	0.95			1.52897	1	0.368734	Pearson correlation	3	normal	ALL	Tessells	R0-2	Evening	mean	NDSI	halfbasins	Frequentist
Sample_percent	Subsample_accuracy	Pearson correlation	0.7955	0.95			1.31281	1	0.414417	Pearson correlation	3	normal	ALL	Tessells	R0-2	Evening	median	ACItf	halfbasins	Frequentist
Sample_percent	Subsample_accuracy	Pearson correlation	0.953033	0.95			3.14672	1	0.195887	Pearson correlation	3	normal	ALL	Tessells	R0-2	Evening	median	ACIft	halfbasins	Frequentist
Sample_percent	Subsample_accuracy	Pearson correlation	0.952697	0.95			3.13469	1	0.196592	Pearson correlation	3	normal	ALL	Tessells	R0-2	Evening	median	BI	halfbasins	Frequentist
Sample_percent	Subsample_accuracy	Pearson correlation	0.30829	0.95			0.324075	1	0.800486	Pearson correlation	3	normal	ALL	Tessells	R0-2	Evening	median	NP	halfbasins	Frequentist
Sample_percent	Subsample_accuracy	Pearson correlation	0.979636	0.95			4.8791	1	0.128697	Pearson correlation	3	normal	ALL	Tessells	R0-2	Evening	median	NDSI	halfbasins	Frequentist
Sample_percent	Subsample_accuracy	Pearson correlation	0.79714	0.95			1.32022	1	0.412691	Pearson correlation	3	normal	ALL	Tessells	R0-24	Full	mean	ACItf	halfbasins	Frequentist
Sample_percent	Subsample_accuracy	Pearson correlation	0.805418	0.95			1.35888	1	0.403882	Pearson correlation	3	normal	ALL	Tessells	R0-24	Full	mean	ACIft	halfbasins	Frequentist
Sample_percent	Subsample_accuracy	Pearson correlation	0.90725	0.95			2.15709	1	0.276354	Pearson correlation	3	normal	ALL	Tessells	R0-24	Full	mean	NP	halfbasins	Frequentist
Sample_percent	Subsample_accuracy	Pearson correlation	0.797206	0.95			1.32052	1	0.412621	Pearson correlation	3	normal	ALL	Tessells	R0-24	Full	median	ACItf	halfbasins	Frequentist
Sample_percent	Subsample_accuracy	Pearson correlation	0.81842	0.95			1.42428	1	0.389701	Pearson correlation	3	normal	ALL	Tessells	R0-24	Full	median	ACIft	halfbasins	Frequentist
Sample_percent	Subsample_accuracy	Pearson correlation	0.859279	0.95			1.67989	1	0.341826	Pearson correlation	3	normal	ALL	Tessells	R0-24	Full	median	NP	halfbasins	Frequentist
Sample_percent	Subsample_accuracy	Pearson correlation	0.988982	0.95			6.68068	1	0.0945903	Pearson correlation	3	normal	ALL	Tessells	R0-24	Dawn	mean	ACItf	halfbasins	Frequentist
Sample_percent	Subsample_accuracy	Pearson correlation	0.945243	0.95			2.89625	1	0.211649	Pearson correlation	3	normal	ALL	Tessells	R0-24	Dawn	mean	ACIft	halfbasins	Frequentist
Sample_percent	Subsample_accuracy	Pearson correlation	0.961948	0.95			3.52062	1	0.176186	Pearson correlation	3	normal	ALL	Tessells	R0-24	Dawn	mean	NP	halfbasins	Frequentist
Sample_percent	Subsample_accuracy	Pearson correlation	0.987673	0.95			6.30974	1	0.100063	Pearson correlation	3	normal	ALL	Tessells	R0-24	Dawn	median	ACItf	halfbasins	Frequentist
Sample_percent	Subsample_accuracy	Pearson correlation	0.931589	0.95			2.56273	1	0.236846	Pearson correlation	3	normal	ALL	Tessells	R0-24	Dawn	median	ACIft	halfbasins	Frequentist
Sample_percent	Subsample_accuracy	Pearson correlation	0.843135	0.95			1.56804	1	0.361414	Pearson correlation	3	normal	ALL	Tessells	R0-24	Dawn	median	NP	halfbasins	Frequentist
Sample_percent	Subsample_accuracy	Pearson correlation	0.736934	0.95			1.0902	1	0.472546	Pearson correlation	3	normal	ALL	Tessells	R2-12	Full	mean	ACItf	halfbasins	Frequentist
Sample_percent	Subsample_accuracy	Pearson correlation	0.939357	0.95			2.73911	1	0.222847	Pearson correlation	3	normal	ALL	Tessells	R2-12	Full	mean	ACIft	halfbasins	Frequentist
Sample_percent	Subsample_accuracy	Pearson correlation	0.836128	0.95			1.52429	1	0.369628	Pearson correlation	3	normal	ALL	Tessells	R2-12	Full	mean	NP	halfbasins	Frequentist
Sample_percent	Subsample_accuracy	Pearson correlation	0.745542	0.95			1.11866	1	0.464382	Pearson correlation	3	normal	ALL	Tessells	R2-12	Full	median	ACItf	halfbasins	Frequentist
Sample_percent	Subsample_accuracy	Pearson correlation	0.950339	0.95			3.05362	1	0.201473	Pearson correlation	3	normal	ALL	Tessells	R2-12	Full	median	ACIft	halfbasins	Frequentist
Sample_percent	Subsample_accuracy	Pearson correlation	0.774845	0.95			1.22573	1	0.435655	Pearson correlation	3	normal	ALL	Tessells	R2-12	Full	median	NP	halfbasins	Frequentist
Sample_percent	Subsample_accuracy	Pearson correlation	0.83808	0.95			1.53622	1	0.367356	Pearson correlation	3	normal	ALL	Tessells	R0-24	Evening	mean	ACItf	halfbasins	Frequentist
Sample_percent	Subsample_accuracy	Pearson correlation	0.804458	0.95			1.35429	1	0.404911	Pearson correlation	3	normal	ALL	Tessells	R0-24	Evening	mean	ACIft	halfbasins	Frequentist
Sample_percent	Subsample_accuracy	Pearson correlation	0.875344	0.95			1.81043	1	0.32127	Pearson correlation	3	normal	ALL	Tessells	R0-24	Evening	mean	NP	halfbasins	Frequentist
Sample_percent	Subsample_accuracy	Pearson correlation	0.811435	0.95			1.38839	1	0.397373	Pearson correlation	3	normal	ALL	Tessells	R0-24	Evening	median	ACItf	halfbasins	Frequentist
Sample_percent	Subsample_accuracy	Pearson correlation	0.772588	0.95			1.21685	1	0.437924	Pearson correlation	3	normal	ALL	Tessells	R0-24	Evening	median	ACIft	halfbasins	Frequentist
Sample_percent	Subsample_accuracy	Pearson correlation	0.923423	0.95			2.40611	1	0.250758	Pearson correlation	3	normal	ALL	Tessells	R0-24	Evening	median	NP	halfbasins	Frequentist
Sample_percent	Subsample_accuracy	Pearson correlation	0.914666	0.95			2.26285	1	0.264907	Pearson correlation	3	normal	ALL	Tessells	R2-12	Dawn	mean	ACItf	halfbasins	Frequentist
Sample_percent	Subsample_accuracy	Pearson correlation	0.998724	0.95			19.7764	1	0.0321635	Pearson correlation	3	normal	ALL	Tessells	R2-12	Dawn	mean	ACIft	halfbasins	Frequentist
Sample_percent	Subsample_accuracy	Pearson correlation	0.939091	0.95			2.73256	1	0.223339	Pearson correlation	3	normal	ALL	Tessells	R2-12	Dawn	mean	NP	halfbasins	Frequentist
Sample_percent	Subsample_accuracy	Pearson correlation	0.947836	0.95			2.97352	1	0.206532	Pearson correlation	3	normal	ALL	Tessells	R2-12	Dawn	median	ACItf	halfbasins	Frequentist
Sample_percent	Subsample_accuracy	Pearson correlation	0.990791	0.95			7.31765	1	0.0864623	Pearson correlation	3	normal	ALL	Tessells	R2-12	Dawn	median	ACIft	halfbasins	Frequentist
Sample_percent	Subsample_accuracy	Pearson correlation	0.873255	0.95			1.79216	1	0.32401	Pearson correlation	3	normal	ALL	Tessells	R2-12	Dawn	median	NP	halfbasins	Frequentist
Sample_percent	Subsample_accuracy	Pearson correlation	0.858268	0.95			1.67238	1	0.343081	Pearson correlation	3	normal	ALL	Tessells	R0-2	Full	mean	ACItf	halfbasins	Frequentist
Sample_percent	Subsample_accuracy	Pearson correlation	0.839442	0.95			1.54466	1	0.365764	Pearson correlation	3	normal	ALL	Tessells	R0-2	Full	mean	ACIft	halfbasins	Frequentist
Sample_percent	Subsample_accuracy	Pearson correlation	0.72842	0.95			1.06318	1	0.48051	Pearson correlation	3	normal	ALL	Tessells	R0-2	Full	mean	BI	halfbasins	Frequentist
Sample_percent	Subsample_accuracy	Pearson correlation	0.995619	0.95			10.6477	1	0.0596146	Pearson correlation	3	normal	ALL	Tessells	R0-2	Full	mean	NP	halfbasins	Frequentist
Sample_percent	Subsample_accuracy	Pearson correlation	0.917739	0.95			2.31061	1	0.260026	Pearson correlation	3	normal	ALL	Tessells	R0-2	Full	mean	NDSI	halfbasins	Frequentist
Sample_percent	Subsample_accuracy	Pearson correlation	0.819279	0.95			1.42882	1	0.388748	Pearson correlation	3	normal	ALL	Tessells	R0-2	Full	median	ACItf	halfbasins	Frequentist
Sample_percent	Subsample_accuracy	Pearson correlation	0.825795	0.95			1.46425	1	0.381454	Pearson correlation	3	normal	ALL	Tessells	R0-2	Full	median	ACIft	halfbasins	Frequentist
Sample_percent	Subsample_accuracy	Pearson correlation	0.895362	0.95			2.01052	1	0.293833	Pearson correlation	3	normal	ALL	Tessells	R0-2	Full	median	BI	halfbasins	Frequentist
Sample_percent	Subsample_accuracy	Pearson correlation	0.84147	0.95			1.5574	1	0.363381	Pearson correlation	3	normal	ALL	Tessells	R0-2	Full	median	NDSI	halfbasins	Frequentist
Sample_percent	Subsample_accuracy	Pearson correlation	0.751533	0.95			1.13921	1	0.458629	Pearson correlation	3	normal	ALL	Tessells	R2-12	Evening	mean	ACItf	halfbasins	Frequentist
Sample_percent	Subsample_accuracy	Pearson correlation	0.887558	0.95			1.92656	1	0.304801	Pearson correlation	3	normal	ALL	Tessells	R2-12	Evening	mean	ACIft	halfbasins	Frequentist
Sample_percent	Subsample_accuracy	Pearson correlation	0.827229	0.95			1.47229	1	0.379832	Pearson correlation	3	normal	ALL	Tessells	R2-12	Evening	mean	NP	halfbasins	Frequentist
Sample_percent	Subsample_accuracy	Pearson correlation	0.746626	0.95			1.12234	1	0.463345	Pearson correlation	3	normal	ALL	Tessells	R2-12	Evening	median	ACItf	halfbasins	Frequentist
Sample_percent	Subsample_accuracy	Pearson correlation	0.847534	0.95			1.59689	1	0.356173	Pearson correlation	3	normal	ALL	Tessells	R2-12	Evening	median	ACIft	halfbasins	Frequentist
Sample_percent	Subsample_accuracy	Pearson correlation	0.875476	0.95			1.8116	1	0.321096	Pearson correlation	3	normal	ALL	Tessells	R2-12	Evening	median	NP	halfbasins	Frequentist
Sample_percent	Subsample_accuracy	Pearson correlation	0.91102	0.95			2.20927	1	0.270593	Pearson correlation	3	normal	ALL	Tessells	R0-2	Dawn	mean	ACItf	halfbasins	Frequentist
Sample_percent	Subsample_accuracy	Pearson correlation	0.984671	0.95			5.64525	1	0.111613	Pearson correlation	3	normal	ALL	Tessells	R0-2	Dawn	mean	ACIft	halfbasins	Frequentist
Sample_percent	Subsample_accuracy	Pearson correlation	-0.122906	0.95			-0.123845	1	0.921557	Pearson correlation	3	normal	ALL	Tessells	R0-2	Dawn	mean	BI	halfbasins	Frequentist
Sample_percent	Subsample_accuracy	Pearson correlation	0.356592	0.95			0.381683	1	0.767878	Pearson correlation	3	normal	ALL	Tessells	R0-2	Dawn	mean	NP	halfbasins	Frequentist
Sample_percent	Subsample_accuracy	Pearson correlation	0.997346	0.95			13.6973	1	0.0463953	Pearson correlation	3	normal	ALL	Tessells	R0-2	Dawn	mean	NDSI	halfbasins	Frequentist
Sample_percent	Subsample_accuracy	Pearson correlation	0.99741	0.95			13.8667	1	0.0458307	Pearson correlation	3	normal	ALL	Tessells	R0-2	Dawn	median	ACItf	halfbasins	Frequentist
Sample_percent	Subsample_accuracy	Pearson correlation	0.999683	0.95			39.7151	1	0.0160263	Pearson correlation	3	normal	ALL	Tessells	R0-2	Dawn	median	ACIft	halfbasins	Frequentist
Sample_percent	Subsample_accuracy	Pearson correlation	0.464452	0.95			0.524451	1	0.692502	Pearson correlation	3	normal	ALL	Tessells	R0-2	Dawn	median	BI	halfbasins	Frequentist
Sample_percent	Subsample_accuracy	Pearson correlation	-0.54996	0.95			-0.658485	1	0.629286	Pearson correlation	3	normal	ALL	Tessells	R0-2	Dawn	median	NP	halfbasins	Frequentist
Sample_percent	Subsample_accuracy	Pearson correlation	0.976319	0.95			4.51297	1	0.138822	Pearson correlation	3	normal	ALL	Tessells	R0-2	Dawn	median	NDSI	halfbasins	Frequentist
Sample_percent	Subsample_accuracy	Pearson correlation	-0.282611	0.95	-0.423683	-0.128153	-3.58422	148	0.000458302	Pearson correlation	150	normal	ALL	Random	R0-2	Full	mean	ACItf	ssample60	Frequentist
Sample_percent	Subsample_accuracy	Pearson correlation	-0.367775	0.95	-0.498646	-0.22051	-4.81138	148	3.65765e-06	Pearson correlation	150	normal	ALL	Random	R0-2	Full	mean	ACIft	ssample60	Frequentist
Sample_percent	Subsample_accuracy	Pearson correlation	-0.0571326	0.95	-0.215422	0.104082	-0.696186	148	0.487405	Pearson correlation	150	normal	ALL	Random	R0-2	Full	mean	BI	ssample60	Frequentist
Sample_percent	Subsample_accuracy	Pearson correlation	-0.359096	0.95	-0.491514	-0.210448	-4.66495	147	6.88093e-06	Pearson correlation	149	normal	ALL	Random	R0-2	Full	mean	NP	ssample60	Frequentist
Sample_percent	Subsample_accuracy	Pearson correlation	0.17912	0.95	0.0194159	0.329911	2.21491	148	0.0282943	Pearson correlation	150	normal	ALL	Random	R0-2	Full	mean	NDSI	ssample60	Frequentist
Sample_percent	Subsample_accuracy	Pearson correlation	-0.214504	0.95	-0.362311	-0.0561741	-2.67175	148	0.00839117	Pearson correlation	150	normal	ALL	Random	R0-2	Full	median	ACItf	ssample60	Frequentist
Sample_percent	Subsample_accuracy	Pearson correlation	-0.309411	0.95	-0.447925	-0.156392	-3.94499	147	0.00012319	Pearson correlation	149	normal	ALL	Random	R0-2	Full	median	ACIft	ssample60	Frequentist
Sample_percent	Subsample_accuracy	Pearson correlation	-0.0878023	0.95	-0.245141	0.074043	-1.06867	147	0.286968	Pearson correlation	149	normal	ALL	Random	R0-2	Full	median	BI	ssample60	Frequentist
Sample_percent	Subsample_accuracy	Pearson correlation	-0.590374	0.95	-0.704019	-0.447249	-7.31449	100	6.55275e-11	Pearson correlation	102	normal	ALL	Random	R0-2	Full	median	NP	ssample60	Frequentist
Sample_percent	Subsample_accuracy	Pearson correlation	0.273378	0.95	0.1183	0.415439	3.4575	148	0.000712053	Pearson correlation	150	normal	ALL	Random	R0-2	Full	median	NDSI	ssample60	Frequentist
Sample_percent	Subsample_accuracy	Pearson correlation	0.206674	0.95	0.0480026	0.355172	2.56978	148	0.0111643	Pearson correlation	150	normal	ALL	Random	R0-2	Dawn	mean	ACItf	ssample60	Frequentist
Sample_percent	Subsample_accuracy	Pearson correlation	-0.213135	0.95	-0.361544	-0.0541926	-2.6449	147	0.00905966	Pearson correlation	149	normal	ALL	Random	R0-2	Dawn	mean	ACIft	ssample60	Frequentist
Sample_percent	Subsample_accuracy	Pearson correlation	0.420151	0.95	0.278652	0.543797	5.63264	148	8.67205e-08	Pearson correlation	150	normal	ALL	Random	R0-2	Dawn	mean	BI	ssample60	Frequentist
Sample_percent	Subsample_accuracy	Pearson correlation	-0.376439	0.95	-0.506164	-0.230057	-4.94319	148	2.05767e-06	Pearson correlation	150	normal	ALL	Random	R0-2	Dawn	mean	NP	ssample60	Frequentist
Sample_percent	Subsample_accuracy	Pearson correlation	-0.182771	0.95	-0.33327	-0.0231885	-2.2616	148	0.0251793	Pearson correlation	150	normal	ALL	Random	R0-2	Dawn	mean	NDSI	ssample60	Frequentist
Sample_percent	Subsample_accuracy	Pearson correlation	0.154533	0.95	-0.00587447	0.307186	1.90283	148	0.0590052	Pearson correlation	150	normal	ALL	Random	R0-2	Dawn	median	ACItf	ssample60	Frequentist
Sample_percent	Subsample_accuracy	Pearson correlation	-0.219062	0.95	-0.366458	-0.06094	-2.73135	148	0.00707483	Pearson correlation	150	normal	ALL	Random	R0-2	Dawn	median	ACIft	ssample60	Frequentist
Sample_percent	Subsample_accuracy	Pearson correlation	0.407242	0.95	0.264225	0.532734	5.42451	148	2.31699e-07	Pearson correlation	150	normal	ALL	Random	R0-2	Dawn	median	BI	ssample60	Frequentist
Sample_percent	Subsample_accuracy	Pearson correlation	-0.098238	0.95	-0.275618	0.0856119	-1.05399	114	0.294115	Pearson correlation	116	normal	ALL	Random	R0-2	Dawn	median	NP	ssample60	Frequentist
Sample_percent	Subsample_accuracy	Pearson correlation	-0.166385	0.95	-0.318163	-0.00629164	-2.05278	148	0.0418552	Pearson correlation	150	normal	ALL	Random	R0-2	Dawn	median	NDSI	ssample60	Frequentist
Sample_percent	Subsample_accuracy	Pearson correlation	0.0290714	0.95	-0.131804	0.188455	0.353818	148	0.723979	Pearson correlation	150	normal	ALL	Random	R0-2	Evening	mean	ACItf	ssample60	Frequentist
Sample_percent	Subsample_accuracy	Pearson correlation	-0.341268	0.95	-0.47595	-0.190947	-4.40192	147	2.05152e-05	Pearson correlation	149	normal	ALL	Random	R0-2	Evening	mean	ACIft	ssample60	Frequentist
Sample_percent	Subsample_accuracy	Pearson correlation	-0.0311974	0.95	-0.190506	0.129713	-0.379718	148	0.704699	Pearson correlation	150	normal	ALL	Random	R0-2	Evening	mean	BI	ssample60	Frequentist
Sample_percent	Subsample_accuracy	Pearson correlation	-0.113936	0.95	-0.269793	0.0477385	-1.39046	147	0.166492	Pearson correlation	149	normal	ALL	Random	R0-2	Evening	mean	NP	ssample60	Frequentist
Sample_percent	Subsample_accuracy	Pearson correlation	-0.0152681	0.95	-0.175101	0.145349	-0.185766	148	0.852883	Pearson correlation	150	normal	ALL	Random	R0-2	Evening	mean	NDSI	ssample60	Frequentist
Sample_percent	Subsample_accuracy	Pearson correlation	-0.0404217	0.95	-0.199392	0.120621	-0.492154	148	0.62334	Pearson correlation	150	normal	ALL	Random	R0-2	Evening	median	ACItf	ssample60	Frequentist
Sample_percent	Subsample_accuracy	Pearson correlation	-0.35631	0.95	-0.489088	-0.207393	-4.62348	147	8.19735e-06	Pearson correlation	149	normal	ALL	Random	R0-2	Evening	median	ACIft	ssample60	Frequentist
Sample_percent	Subsample_accuracy	Pearson correlation	-0.112443	0.95	-0.267877	0.0486959	-1.37666	148	0.170696	Pearson correlation	150	normal	ALL	Random	R0-2	Evening	median	BI	ssample60	Frequentist
Sample_percent	Subsample_accuracy	Pearson correlation	0.0629038	0.95	-0.127587	0.248919	0.64892	106	0.517794	Pearson correlation	108	normal	ALL	Random	R0-2	Evening	median	NP	ssample60	Frequentist
Sample_percent	Subsample_accuracy	Pearson correlation	0.0338027	0.95	-0.127691	0.193551	0.410071	147	0.682351	Pearson correlation	149	normal	ALL	Random	R0-2	Evening	median	NDSI	ssample60	Frequentist
Sample_percent	Subsample_accuracy	Pearson correlation	-0.255335	0.95	-0.399259	-0.0991299	-3.21278	148	0.00161335	Pearson correlation	150	normal	ALL	Random	R0-24	Full	mean	ACItf	ssample60	Frequentist
Sample_percent	Subsample_accuracy	Pearson correlation	-0.0862131	0.95	-0.245227	0.0773182	-1.03842	144	0.300814	Pearson correlation	146	normal	ALL	Random	R0-24	Full	mean	ACIft	ssample60	Frequentist
Sample_percent	Subsample_accuracy	Pearson correlation	0.0274754	0.95	-0.133373	0.186914	0.334379	148	0.738567	Pearson correlation	150	normal	ALL	Random	R0-24	Full	mean	NP	ssample60	Frequentist
Sample_percent	Subsample_accuracy	Pearson correlation	-0.155589	0.95	-0.309682	0.00646708	-1.89664	145	0.0598645	Pearson correlation	147	normal	ALL	Random	R0-24	Full	median	ACItf	ssample60	Frequentist
Sample_percent	Subsample_accuracy	Pearson correlation	-0.0576062	0.95	-0.218014	0.105833	-0.692425	144	0.489786	Pearson correlation	146	normal	ALL	Random	R0-24	Full	median	ACIft	ssample60	Frequentist
Sample_percent	Subsample_accuracy	Pearson correlation	-0.0964896	0.95	-0.252841	0.0647736	-1.17935	148	0.240151	Pearson correlation	150	normal	ALL	Random	R0-24	Full	median	NP	ssample60	Frequentist
Sample_percent	Subsample_accuracy	Pearson correlation	-0.0575535	0.95	-0.215824	0.103664	-0.701332	148	0.484197	Pearson correlation	150	normal	ALL	Random	R0-24	Dawn	mean	ACItf	ssample60	Frequentist
Sample_percent	Subsample_accuracy	Pearson correlation	-0.169473	0.95	-0.321511	-0.00891597	-2.08491	147	0.0388068	Pearson correlation	149	normal	ALL	Random	R0-24	Dawn	mean	ACIft	ssample60	Frequentist
Sample_percent	Subsample_accuracy	Pearson correlation	0.0729747	0.95	-0.0883197	0.23054	0.890149	148	0.374831	Pearson correlation	150	normal	ALL	Random	R0-24	Dawn	mean	NP	ssample60	Frequentist
Sample_percent	Subsample_accuracy	Pearson correlation	-0.084621	0.95	-0.241606	0.0766804	-1.03316	148	0.303212	Pearson correlation	150	normal	ALL	Random	R0-24	Dawn	median	ACItf	ssample60	Frequentist
Sample_percent	Subsample_accuracy	Pearson correlation	-0.143185	0.95	-0.297144	0.0180298	-1.7541	147	0.0814967	Pearson correlation	149	normal	ALL	Random	R0-24	Dawn	median	ACIft	ssample60	Frequentist
Sample_percent	Subsample_accuracy	Pearson correlation	0.24606	0.95	0.0893203	0.390906	3.0884	148	0.00240378	Pearson correlation	150	normal	ALL	Random	R0-24	Dawn	median	NP	ssample60	Frequentist
Sample_percent	Subsample_accuracy	Pearson correlation	-0.179846	0.95	-0.33207	-0.0184907	-2.20152	145	0.0292796	Pearson correlation	147	normal	ALL	Random	R0-24	Evening	mean	ACItf	ssample60	Frequentist
Sample_percent	Subsample_accuracy	Pearson correlation	-0.219587	0.95	-0.369374	-0.058678	-2.69157	143	0.00796	Pearson correlation	145	normal	ALL	Random	R0-24	Evening	mean	ACIft	ssample60	Frequentist
Sample_percent	Subsample_accuracy	Pearson correlation	0.124927	0.95	-0.0360562	0.279591	1.5318	148	0.127705	Pearson correlation	150	normal	ALL	Random	R0-24	Evening	mean	NP	ssample60	Frequentist
Sample_percent	Subsample_accuracy	Pearson correlation	-0.159319	0.95	-0.312627	0.00207804	-1.94997	146	0.0530959	Pearson correlation	148	normal	ALL	Random	R0-24	Evening	median	ACItf	ssample60	Frequentist
Sample_percent	Subsample_accuracy	Pearson correlation	-0.209726	0.95	-0.36092	-0.0477897	-2.55602	142	0.011639	Pearson correlation	144	normal	ALL	Random	R0-24	Evening	median	ACIft	ssample60	Frequentist
Sample_percent	Subsample_accuracy	Pearson correlation	0.069268	0.95	-0.092015	0.227009	0.84471	148	0.399636	Pearson correlation	150	normal	ALL	Random	R0-24	Evening	median	NP	ssample60	Frequentist
Sample_percent	Subsample_accuracy	Pearson correlation	-0.0457374	0.95	-0.2045	0.11537	-0.557003	148	0.578367	Pearson correlation	150	normal	ALL	Random	R2-12	Full	mean	ACItf	ssample60	Frequentist
Sample_percent	Subsample_accuracy	Pearson correlation	0.0368199	0.95	-0.126384	0.198083	0.442138	144	0.659052	Pearson correlation	146	normal	ALL	Random	R2-12	Full	mean	ACIft	ssample60	Frequentist
Sample_percent	Subsample_accuracy	Pearson correlation	-0.280112	0.95	-0.421454	-0.125484	-3.54982	148	0.000517123	Pearson correlation	150	normal	ALL	Random	R2-12	Full	mean	NP	ssample60	Frequentist
Sample_percent	Subsample_accuracy	Pearson correlation	0.0474916	0.95	-0.113635	0.206184	0.578413	148	0.563864	Pearson correlation	150	normal	ALL	Random	R2-12	Full	median	ACItf	ssample60	Frequentist
Sample_percent	Subsample_accuracy	Pearson correlation	0.0786634	0.95	-0.0837433	0.236999	0.953448	146	0.341939	Pearson correlation	148	normal	ALL	Random	R2-12	Full	median	ACIft	ssample60	Frequentist
Sample_percent	Subsample_accuracy	Pearson correlation	-0.23901	0.95	-0.384542	-0.0818855	-2.99448	148	0.00322334	Pearson correlation	150	normal	ALL	Random	R2-12	Full	median	NP	ssample60	Frequentist
Sample_percent	Subsample_accuracy	Pearson correlation	0.0889699	0.95	-0.0723228	0.245728	1.08668	148	0.278947	Pearson correlation	150	normal	ALL	Random	R2-12	Dawn	mean	ACItf	ssample60	Frequentist
Sample_percent	Subsample_accuracy	Pearson correlation	0.00625832	0.95	-0.156349	0.168535	0.0751013	144	0.940238	Pearson correlation	146	normal	ALL	Random	R2-12	Dawn	mean	ACIft	ssample60	Frequentist
Sample_percent	Subsample_accuracy	Pearson correlation	-0.257498	0.95	-0.401203	-0.101421	-3.24191	148	0.00146705	Pearson correlation	150	normal	ALL	Random	R2-12	Dawn	mean	NP	ssample60	Frequentist
Sample_percent	Subsample_accuracy	Pearson correlation	0.0303656	0.95	-0.130531	0.189704	0.369584	148	0.712221	Pearson correlation	150	normal	ALL	Random	R2-12	Dawn	median	ACItf	ssample60	Frequentist
Sample_percent	Subsample_accuracy	Pearson correlation	-0.0018643	0.95	-0.163159	0.159528	-0.0225265	146	0.982059	Pearson correlation	148	normal	ALL	Random	R2-12	Dawn	median	ACIft	ssample60	Frequentist
Sample_percent	Subsample_accuracy	Pearson correlation	-0.0404326	0.95	-0.199933	0.121155	-0.49062	147	0.624427	Pearson correlation	149	normal	ALL	Random	R2-12	Dawn	median	NP	ssample60	Frequentist
Sample_percent	Subsample_accuracy	Pearson correlation	-0.035333	0.95	-0.194493	0.12564	-0.430113	148	0.667739	Pearson correlation	150	normal	ALL	Random	R2-12	Evening	mean	ACItf	ssample60	Frequentist
Sample_percent	Subsample_accuracy	Pearson correlation	-0.039391	0.95	-0.198931	0.122183	-0.477961	147	0.633388	Pearson correlation	149	normal	ALL	Random	R2-12	Evening	mean	ACIft	ssample60	Frequentist
Sample_percent	Subsample_accuracy	Pearson correlation	-0.237602	0.95	-0.383269	-0.0804022	-2.97577	148	0.00341455	Pearson correlation	150	normal	ALL	Random	R2-12	Evening	mean	NP	ssample60	Frequentist
Sample_percent	Subsample_accuracy	Pearson correlation	-0.0206063	0.95	-0.180272	0.140118	-0.25074	148	0.802363	Pearson correlation	150	normal	ALL	Random	R2-12	Evening	median	ACItf	ssample60	Frequentist
Sample_percent	Subsample_accuracy	Pearson correlation	-0.0632464	0.95	-0.221265	0.0980085	-0.770969	148	0.441954	Pearson correlation	150	normal	ALL	Random	R2-12	Evening	median	ACIft	ssample60	Frequentist
Sample_percent	Subsample_accuracy	Pearson correlation	-0.184378	0.95	-0.334749	-0.0248512	-2.28219	148	0.0239036	Pearson correlation	150	normal	ALL	Random	R2-12	Evening	median	NP	ssample60	Frequentist
Sample_percent	Subsample_accuracy	Pearson correlation	-0.312193	0.95	-0.450828	-0.15885	-3.9707	146	0.000112102	Pearson correlation	148	normal	ALL	Random	R12-24	Full	mean	ACItf	ssample60	Frequentist
Sample_percent	Subsample_accuracy	Pearson correlation	-0.0796545	0.95	-0.23794	0.0827529	-0.965537	146	0.335873	Pearson correlation	148	normal	ALL	Random	R12-24	Full	mean	ACIft	ssample60	Frequentist
Sample_percent	Subsample_accuracy	Pearson correlation	-0.118342	0.95	-0.273418	0.0427301	-1.44988	148	0.149208	Pearson correlation	150	normal	ALL	Random	R12-24	Full	mean	NP	ssample60	Frequentist
Sample_percent	Subsample_accuracy	Pearson correlation	-0.201754	0.95	-0.351161	-0.0423268	-2.49749	147	0.0136097	Pearson correlation	149	normal	ALL	Random	R12-24	Full	median	ACItf	ssample60	Frequentist
Sample_percent	Subsample_accuracy	Pearson correlation	-0.0280184	0.95	-0.189054	0.134485	-0.337519	145	0.736214	Pearson correlation	147	normal	ALL	Random	R12-24	Full	median	ACIft	ssample60	Frequentist
Sample_percent	Subsample_accuracy	Pearson correlation	0.0708559	0.95	-0.0909807	0.229046	0.861247	147	0.390505	Pearson correlation	149	normal	ALL	Random	R12-24	Full	median	NP	ssample60	Frequentist
Sample_percent	Subsample_accuracy	Pearson correlation	-0.0575625	0.95	-0.215833	0.103655	-0.701441	148	0.48413	Pearson correlation	150	normal	ALL	Random	R12-24	Dawn	mean	ACItf	ssample60	Frequentist
Sample_percent	Subsample_accuracy	Pearson correlation	-0.240161	0.95	-0.386052	-0.0825485	-2.99958	147	0.00317623	Pearson correlation	149	normal	ALL	Random	R12-24	Dawn	mean	ACIft	ssample60	Frequentist
Sample_percent	Subsample_accuracy	Pearson correlation	0.195945	0.95	0.0368399	0.345361	2.43089	148	0.0162573	Pearson correlation	150	normal	ALL	Random	R12-24	Dawn	mean	NP	ssample60	Frequentist
Sample_percent	Subsample_accuracy	Pearson correlation	-0.0836471	0.95	-0.240682	0.0776554	-1.02119	148	0.308831	Pearson correlation	150	normal	ALL	Random	R12-24	Dawn	median	ACItf	ssample60	Frequentist
Sample_percent	Subsample_accuracy	Pearson correlation	-0.189764	0.95	-0.340184	-0.0298757	-2.34335	147	0.0204515	Pearson correlation	149	normal	ALL	Random	R12-24	Dawn	median	ACIft	ssample60	Frequentist
Sample_percent	Subsample_accuracy	Pearson correlation	0.373939	0.95	0.227299	0.503997	4.90501	148	2.43334e-06	Pearson correlation	150	normal	ALL	Random	R12-24	Dawn	median	NP	ssample60	Frequentist
Sample_percent	Subsample_accuracy	Pearson correlation	-0.257134	0.95	-0.40134	-0.100489	-3.22606	147	0.00154714	Pearson correlation	149	normal	ALL	Random	R12-24	Evening	mean	ACItf	ssample60	Frequentist
Sample_percent	Subsample_accuracy	Pearson correlation	-0.356964	0.95	-0.491381	-0.205938	-4.56973	143	1.04665e-05	Pearson correlation	145	normal	ALL	Random	R12-24	Evening	mean	ACIft	ssample60	Frequentist
Sample_percent	Subsample_accuracy	Pearson correlation	0.189626	0.95	0.0302851	0.339568	2.34953	148	0.0201181	Pearson correlation	150	normal	ALL	Random	R12-24	Evening	mean	NP	ssample60	Frequentist
Sample_percent	Subsample_accuracy	Pearson correlation	-0.177309	0.95	-0.329234	-0.0164353	-2.17692	146	0.0310931	Pearson correlation	148	normal	ALL	Random	R12-24	Evening	median	ACItf	ssample60	Frequentist
Sample_percent	Subsample_accuracy	Pearson correlation	-0.247128	0.95	-0.395244	-0.0864883	-3.02842	141	0.00292431	Pearson correlation	143	normal	ALL	Random	R12-24	Evening	median	ACIft	ssample60	Frequentist
Sample_percent	Subsample_accuracy	Pearson correlation	0.320026	0.95	0.168401	0.456856	4.1094	148	6.54583e-05	Pearson correlation	150	normal	ALL	Random	R12-24	Evening	median	NP	ssample60	Frequentist
Sample_percent	Subsample_accuracy	Pearson correlation	-0.108584	0.95	-0.264248	0.0525923	-1.32884	148	0.185945	Pearson correlation	150	normal	ALL	Random	R0-2	Full	mean	ACItf	ssample20	Frequentist
Sample_percent	Subsample_accuracy	Pearson correlation	-0.0543118	0.95	-0.212722	0.10688	-0.661708	148	0.509187	Pearson correlation	150	normal	ALL	Random	R0-2	Full	mean	ACIft	ssample20	Frequentist
Sample_percent	Subsample_accuracy	Pearson correlation	0.203115	0.95	0.0442955	0.351921	2.52361	148	0.0126714	Pearson correlation	150	normal	ALL	Random	R0-2	Full	mean	BI	ssample20	Frequentist
Sample_percent	Subsample_accuracy	Pearson correlation	-0.158821	0.95	-0.311162	0.00147844	-1.95698	148	0.0522321	Pearson correlation	150	normal	ALL	Random	R0-2	Full	mean	NP	ssample20	Frequentist
Sample_percent	Subsample_accuracy	Pearson correlation	0.11623	0.95	-0.0448677	0.271435	1.42364	148	0.156655	Pearson correlation	150	normal	ALL	Random	R0-2	Full	mean	NDSI	ssample20	Frequentist
Sample_percent	Subsample_accuracy	Pearson correlation	-0.199473	0.95	-0.348591	-0.0405062	-2.47646	148	0.0143954	Pearson correlation	150	normal	ALL	Random	R0-2	Full	median	ACItf	ssample20	Frequentist
Sample_percent	Subsample_accuracy	Pearson correlation	-0.137853	0.95	-0.29167	0.0229152	-1.69321	148	0.0925185	Pearson correlation	150	normal	ALL	Random	R0-2	Full	median	ACIft	ssample20	Frequentist
Sample_percent	Subsample_accuracy	Pearson correlation	0.189744	0.95	0.0304066	0.339676	2.35104	148	0.0200398	Pearson correlation	150	normal	ALL	Random	R0-2	Full	median	BI	ssample20	Frequentist
Sample_percent	Subsample_accuracy	Pearson correlation	0.394844	0.95	0.0596163	0.650038	2.39282	31	0.022964	Pearson correlation	33	normal	ALL	Random	R0-2	Full	median	NP	ssample20	Frequentist
Sample_percent	Subsample_accuracy	Pearson correlation	0.10435	0.95	-0.057413	0.260775	1.27213	147	0.205337	Pearson correlation	149	normal	ALL	Random	R0-2	Full	median	NDSI	ssample20	Frequentist
Sample_percent	Subsample_accuracy	Pearson correlation	-0.0794787	0.95	-0.236725	0.0818251	-0.969968	148	0.333645	Pearson correlation	150	normal	ALL	Random	R0-2	Dawn	mean	ACItf	ssample20	Frequentist
Sample_percent	Subsample_accuracy	Pearson correlation	-0.272348	0.95	-0.414975	-0.116657	-3.43177	147	0.000778916	Pearson correlation	149	normal	ALL	Random	R0-2	Dawn	mean	ACIft	ssample20	Frequentist
Sample_percent	Subsample_accuracy	Pearson correlation	0.302571	0.95	0.149561	0.441427	3.86195	148	0.000167672	Pearson correlation	150	normal	ALL	Random	R0-2	Dawn	mean	BI	ssample20	Frequentist
Sample_percent	Subsample_accuracy	Pearson correlation	-0.284465	0.95	-0.425788	-0.129593	-3.59758	147	0.000438069	Pearson correlation	149	normal	ALL	Random	R0-2	Dawn	mean	NP	ssample20	Frequentist
Sample_percent	Subsample_accuracy	Pearson correlation	0.00968072	0.95	-0.151355	0.170216	0.117378	147	0.906721	Pearson correlation	149	normal	ALL	Random	R0-2	Dawn	mean	NDSI	ssample20	Frequentist
Sample_percent	Subsample_accuracy	Pearson correlation	-0.144864	0.95	-0.298203	0.0157633	-1.78114	148	0.0769412	Pearson correlation	150	normal	ALL	Random	R0-2	Dawn	median	ACItf	ssample20	Frequentist
Sample_percent	Subsample_accuracy	Pearson correlation	-0.308538	0.95	-0.4476	-0.154906	-3.9193	146	0.000136065	Pearson correlation	148	normal	ALL	Random	R0-2	Dawn	median	ACIft	ssample20	Frequentist
Sample_percent	Subsample_accuracy	Pearson correlation	0.290266	0.95	0.136347	0.430501	3.69011	148	0.000314355	Pearson correlation	150	normal	ALL	Random	R0-2	Dawn	median	BI	ssample20	Frequentist
Sample_percent	Subsample_accuracy	Pearson correlation	-0.234527	0.95	-0.472609	0.0354608	-1.73972	52	0.0878251	Pearson correlation	54	normal	ALL	Random	R0-2	Dawn	median	NP	ssample20	Frequentist
Sample_percent	Subsample_accuracy	Pearson correlation	-0.06218	0.95	-0.220247	0.0990688	-0.757918	148	0.449705	Pearson correlation	150	normal	ALL	Random	R0-2	Dawn	median	NDSI	ssample20	Frequentist
Sample_percent	Subsample_accuracy	Pearson correlation	0.116809	0.95	-0.0442819	0.271979	1.43083	148	0.154586	Pearson correlation	150	normal	ALL	Random	R0-2	Evening	mean	ACItf	ssample20	Frequentist
Sample_percent	Subsample_accuracy	Pearson correlation	-0.184902	0.95	-0.33572	-0.0248407	-2.28115	147	0.0239761	Pearson correlation	149	normal	ALL	Random	R0-2	Evening	mean	ACIft	ssample20	Frequentist
Sample_percent	Subsample_accuracy	Pearson correlation	0.205128	0.95	0.0463916	0.35376	2.54971	148	0.0117985	Pearson correlation	150	normal	ALL	Random	R0-2	Evening	mean	BI	ssample20	Frequentist
Sample_percent	Subsample_accuracy	Pearson correlation	-0.0581304	0.95	-0.216376	0.103092	-0.708384	148	0.479821	Pearson correlation	150	normal	ALL	Random	R0-2	Evening	mean	NP	ssample20	Frequentist
Sample_percent	Subsample_accuracy	Pearson correlation	0.0903987	0.95	-0.0708898	0.247081	1.10427	148	0.271268	Pearson correlation	150	normal	ALL	Random	R0-2	Evening	mean	NDSI	ssample20	Frequentist
Sample_percent	Subsample_accuracy	Pearson correlation	0.0613626	0.95	-0.100428	0.219992	0.745387	147	0.457228	Pearson correlation	149	normal	ALL	Random	R0-2	Evening	median	ACItf	ssample20	Frequentist
Sample_percent	Subsample_accuracy	Pearson correlation	-0.186354	0.95	-0.337054	-0.0263439	-2.29971	147	0.0228723	Pearson correlation	149	normal	ALL	Random	R0-2	Evening	median	ACIft	ssample20	Frequentist
Sample_percent	Subsample_accuracy	Pearson correlation	0.153005	0.95	-0.00799127	0.30627	1.87719	147	0.0624731	Pearson correlation	149	normal	ALL	Random	R0-2	Evening	median	BI	ssample20	Frequentist
Sample_percent	Subsample_accuracy	Pearson correlation	0.403697	0.95	0.0916691	0.643538	2.61048	35	0.0132201	Pearson correlation	37	normal	ALL	Random	R0-2	Evening	median	NP	ssample20	Frequentist
Sample_percent	Subsample_accuracy	Pearson correlation	0.0540249	0.95	-0.107164	0.212447	0.658203	148	0.51143	Pearson correlation	150	normal	ALL	Random	R0-2	Evening	median	NDSI	ssample20	Frequentist
Sample_percent	Subsample_accuracy	Pearson correlation	0.0122888	0.95	-0.15046	0.174389	0.147477	144	0.882962	Pearson correlation	146	normal	ALL	Random	R0-24	Full	mean	ACItf	ssample20	Frequentist
Sample_percent	Subsample_accuracy	Pearson correlation	-0.0999347	0.95	-0.257659	0.0629775	-1.20943	145	0.228467	Pearson correlation	147	normal	ALL	Random	R0-24	Full	mean	ACIft	ssample20	Frequentist
Sample_percent	Subsample_accuracy	Pearson correlation	0.103254	0.95	-0.057967	0.259226	1.26289	148	0.208616	Pearson correlation	150	normal	ALL	Random	R0-24	Full	mean	NP	ssample20	Frequentist
Sample_percent	Subsample_accuracy	Pearson correlation	-0.209704	0.95	-0.358418	-0.050611	-2.60035	147	0.0102637	Pearson correlation	149	normal	ALL	Random	R0-24	Full	median	ACItf	ssample20	Frequentist
Sample_percent	Subsample_accuracy	Pearson correlation	-0.283308	0.95	-0.428058	-0.124386	-3.49535	140	0.000634461	Pearson correlation	142	normal	ALL	Random	R0-24	Full	median	ACIft	ssample20	Frequentist
Sample_percent	Subsample_accuracy	Pearson correlation	0.0599907	0.95	-0.101244	0.218155	0.731136	148	0.465852	Pearson correlation	150	normal	ALL	Random	R0-24	Full	median	NP	ssample20	Frequentist
Sample_percent	Subsample_accuracy	Pearson correlation	-0.168705	0.95	-0.321809	-0.00700322	-2.06102	145	0.0410875	Pearson correlation	147	normal	ALL	Random	R0-24	Dawn	mean	ACItf	ssample20	Frequentist
Sample_percent	Subsample_accuracy	Pearson correlation	-0.355421	0.95	-0.489167	-0.205343	-4.5788	145	9.98151e-06	Pearson correlation	147	normal	ALL	Random	R0-24	Dawn	mean	ACIft	ssample20	Frequentist
Sample_percent	Subsample_accuracy	Pearson correlation	0.0297847	0.95	-0.131103	0.189143	0.362507	148	0.71749	Pearson correlation	150	normal	ALL	Random	R0-24	Dawn	mean	NP	ssample20	Frequentist
Sample_percent	Subsample_accuracy	Pearson correlation	-0.166271	0.95	-0.320591	-0.00335252	-2.01638	143	0.0456329	Pearson correlation	145	normal	ALL	Random	R0-24	Dawn	median	ACItf	ssample20	Frequentist
Sample_percent	Subsample_accuracy	Pearson correlation	-0.44387	0.95	-0.566327	-0.302238	-5.90266	142	2.51339e-08	Pearson correlation	144	normal	ALL	Random	R0-24	Dawn	median	ACIft	ssample20	Frequentist
Sample_percent	Subsample_accuracy	Pearson correlation	0.119363	0.95	-0.0416963	0.274376	1.46257	148	0.145706	Pearson correlation	150	normal	ALL	Random	R0-24	Dawn	median	NP	ssample20	Frequentist
Sample_percent	Subsample_accuracy	Pearson correlation	-0.0618354	0.95	-0.221511	0.10107	-0.746024	145	0.45686	Pearson correlation	147	normal	ALL	Random	R0-24	Evening	mean	ACItf	ssample20	Frequentist
Sample_percent	Subsample_accuracy	Pearson correlation	-0.132775	0.95	-0.291135	0.0326663	-1.58505	140	0.11521	Pearson correlation	142	normal	ALL	Random	R0-24	Evening	mean	ACIft	ssample20	Frequentist
Sample_percent	Subsample_accuracy	Pearson correlation	0.169044	0.95	0.00847441	0.321115	2.07948	147	0.0393104	Pearson correlation	149	normal	ALL	Random	R0-24	Evening	mean	NP	ssample20	Frequentist
Sample_percent	Subsample_accuracy	Pearson correlation	-0.138437	0.95	-0.293232	0.0234298	-1.68901	146	0.0933524	Pearson correlation	148	normal	ALL	Random	R0-24	Evening	median	ACItf	ssample20	Frequentist
Sample_percent	Subsample_accuracy	Pearson correlation	-0.248454	0.95	-0.396936	-0.0872993	-3.03491	140	0.0028694	Pearson correlation	142	normal	ALL	Random	R0-24	Evening	median	ACIft	ssample20	Frequentist
Sample_percent	Subsample_accuracy	Pearson correlation	0.1423	0.95	-0.0189334	0.296319	1.74303	147	0.0834192	Pearson correlation	149	normal	ALL	Random	R0-24	Evening	median	NP	ssample20	Frequentist
Sample_percent	Subsample_accuracy	Pearson correlation	-0.177808	0.95	-0.328703	-0.0180608	-2.19815	148	0.0294918	Pearson correlation	150	normal	ALL	Random	R2-12	Full	mean	ACItf	ssample20	Frequentist
Sample_percent	Subsample_accuracy	Pearson correlation	-0.247421	0.95	-0.396008	-0.0862073	-3.02147	140	0.00299159	Pearson correlation	142	normal	ALL	Random	R2-12	Full	mean	ACIft	ssample20	Frequentist
Sample_percent	Subsample_accuracy	Pearson correlation	0.250175	0.95	0.0936693	0.394615	3.14347	148	0.0020176	Pearson correlation	150	normal	ALL	Random	R2-12	Full	mean	NP	ssample20	Frequentist
Sample_percent	Subsample_accuracy	Pearson correlation	-0.328116	0.95	-0.464413	-0.176636	-4.21135	147	4.40544e-05	Pearson correlation	149	normal	ALL	Random	R2-12	Full	median	ACItf	ssample20	Frequentist
Sample_percent	Subsample_accuracy	Pearson correlation	-0.352069	0.95	-0.487566	-0.200012	-4.48238	142	1.50886e-05	Pearson correlation	144	normal	ALL	Random	R2-12	Full	median	ACIft	ssample20	Frequentist
Sample_percent	Subsample_accuracy	Pearson correlation	0.338533	0.95	0.187965	0.473554	4.36205	147	2.41185e-05	Pearson correlation	149	normal	ALL	Random	R2-12	Full	median	NP	ssample20	Frequentist
Sample_percent	Subsample_accuracy	Pearson correlation	-0.184847	0.95	-0.336165	-0.0242252	-2.27267	146	0.0245057	Pearson correlation	148	normal	ALL	Random	R2-12	Dawn	mean	ACItf	ssample20	Frequentist
Sample_percent	Subsample_accuracy	Pearson correlation	-0.277215	0.95	-0.419323	-0.121846	-3.49815	147	0.000620083	Pearson correlation	149	normal	ALL	Random	R2-12	Dawn	mean	ACIft	ssample20	Frequentist
Sample_percent	Subsample_accuracy	Pearson correlation	-0.0370125	0.95	-0.196111	0.123984	-0.450586	148	0.652948	Pearson correlation	150	normal	ALL	Random	R2-12	Dawn	mean	NP	ssample20	Frequentist
Sample_percent	Subsample_accuracy	Pearson correlation	-0.222418	0.95	-0.370954	-0.0627853	-2.74708	145	0.00677606	Pearson correlation	147	normal	ALL	Random	R2-12	Dawn	median	ACItf	ssample20	Frequentist
Sample_percent	Subsample_accuracy	Pearson correlation	-0.346294	0.95	-0.481209	-0.195352	-4.44496	145	1.73556e-05	Pearson correlation	147	normal	ALL	Random	R2-12	Dawn	median	ACIft	ssample20	Frequentist
Sample_percent	Subsample_accuracy	Pearson correlation	0.00669446	0.95	-0.154817	0.167857	0.0808913	146	0.935639	Pearson correlation	148	normal	ALL	Random	R2-12	Dawn	median	NP	ssample20	Frequentist
Sample_percent	Subsample_accuracy	Pearson correlation	-0.0802627	0.95	-0.237991	0.0815903	-0.976283	147	0.330528	Pearson correlation	149	normal	ALL	Random	R2-12	Evening	mean	ACItf	ssample20	Frequentist
Sample_percent	Subsample_accuracy	Pearson correlation	-0.116942	0.95	-0.273133	0.0452556	-1.42278	146	0.156933	Pearson correlation	148	normal	ALL	Random	R2-12	Evening	mean	ACIft	ssample20	Frequentist
Sample_percent	Subsample_accuracy	Pearson correlation	0.0341892	0.95	-0.126767	0.193391	0.416173	148	0.677886	Pearson correlation	150	normal	ALL	Random	R2-12	Evening	mean	NP	ssample20	Frequentist
Sample_percent	Subsample_accuracy	Pearson correlation	-0.142079	0.95	-0.29561	0.0186059	-1.74618	148	0.082854	Pearson correlation	150	normal	ALL	Random	R2-12	Evening	median	ACItf	ssample20	Frequentist
Sample_percent	Subsample_accuracy	Pearson correlation	-0.192371	0.95	-0.346659	-0.0279473	-2.31118	139	0.0222935	Pearson correlation	141	normal	ALL	Random	R2-12	Evening	median	ACIft	ssample20	Frequentist
Sample_percent	Subsample_accuracy	Pearson correlation	0.010107	0.95	-0.150938	0.17063	0.122547	147	0.902633	Pearson correlation	149	normal	ALL	Random	R2-12	Evening	median	NP	ssample20	Frequentist
Sample_percent	Subsample_accuracy	Pearson correlation	0.0746062	0.95	-0.0872404	0.232615	0.90708	147	0.365849	Pearson correlation	149	normal	ALL	Random	R12-24	Full	mean	ACItf	ssample20	Frequentist
Sample_percent	Subsample_accuracy	Pearson correlation	0.028504	0.95	-0.135133	0.190627	0.340997	143	0.733606	Pearson correlation	145	normal	ALL	Random	R12-24	Full	mean	ACIft	ssample20	Frequentist
Sample_percent	Subsample_accuracy	Pearson correlation	0.119612	0.95	-0.0414438	0.27461	1.46567	148	0.14486	Pearson correlation	150	normal	ALL	Random	R12-24	Full	mean	NP	ssample20	Frequentist
Sample_percent	Subsample_accuracy	Pearson correlation	-0.103019	0.95	-0.26004	0.0593108	-1.25144	146	0.212775	Pearson correlation	148	normal	ALL	Random	R12-24	Full	median	ACItf	ssample20	Frequentist
Sample_percent	Subsample_accuracy	Pearson correlation	-0.193202	0.95	-0.347418	-0.0288102	-2.32156	139	0.0217103	Pearson correlation	141	normal	ALL	Random	R12-24	Full	median	ACIft	ssample20	Frequentist
Sample_percent	Subsample_accuracy	Pearson correlation	0.1814	0.95	0.0217714	0.33201	2.24406	148	0.0263126	Pearson correlation	150	normal	ALL	Random	R12-24	Full	median	NP	ssample20	Frequentist
Sample_percent	Subsample_accuracy	Pearson correlation	-0.0820431	0.95	-0.240207	0.0803645	-0.994684	146	0.321536	Pearson correlation	148	normal	ALL	Random	R12-24	Dawn	mean	ACItf	ssample20	Frequentist
Sample_percent	Subsample_accuracy	Pearson correlation	-0.282881	0.95	-0.426235	-0.125666	-3.52681	143	0.00056571	Pearson correlation	145	normal	ALL	Random	R12-24	Dawn	mean	ACIft	ssample20	Frequentist
Sample_percent	Subsample_accuracy	Pearson correlation	0.0402885	0.95	-0.120753	0.199263	0.49053	148	0.624486	Pearson correlation	150	normal	ALL	Random	R12-24	Dawn	mean	NP	ssample20	Frequentist
Sample_percent	Subsample_accuracy	Pearson correlation	-0.0785688	0.95	-0.237442	0.084398	-0.949027	145	0.344186	Pearson correlation	147	normal	ALL	Random	R12-24	Dawn	median	ACItf	ssample20	Frequentist
Sample_percent	Subsample_accuracy	Pearson correlation	-0.340821	0.95	-0.476867	-0.188827	-4.35031	144	2.55946e-05	Pearson correlation	146	normal	ALL	Random	R12-24	Dawn	median	ACIft	ssample20	Frequentist
Sample_percent	Subsample_accuracy	Pearson correlation	0.156195	0.95	-0.0041709	0.308728	1.92381	148	0.0562982	Pearson correlation	150	normal	ALL	Random	R12-24	Dawn	median	NP	ssample20	Frequentist
Sample_percent	Subsample_accuracy	Pearson correlation	-0.024668	0.95	-0.184201	0.136132	-0.300191	148	0.764453	Pearson correlation	150	normal	ALL	Random	R12-24	Evening	mean	ACItf	ssample20	Frequentist
Sample_percent	Subsample_accuracy	Pearson correlation	-0.155517	0.95	-0.311176	0.00826979	-1.87602	142	0.0627054	Pearson correlation	144	normal	ALL	Random	R12-24	Evening	mean	ACIft	ssample20	Frequentist
Sample_percent	Subsample_accuracy	Pearson correlation	0.165959	0.95	0.00585342	0.317769	2.04737	148	0.0423899	Pearson correlation	150	normal	ALL	Random	R12-24	Evening	mean	NP	ssample20	Frequentist
Sample_percent	Subsample_accuracy	Pearson correlation	-0.0896844	0.95	-0.247977	0.0732728	-1.08431	145	0.280026	Pearson correlation	147	normal	ALL	Random	R12-24	Evening	median	ACItf	ssample20	Frequentist
Sample_percent	Subsample_accuracy	Pearson correlation	-0.194994	0.95	-0.346974	-0.0330344	-2.37742	143	0.0187573	Pearson correlation	145	normal	ALL	Random	R12-24	Evening	median	ACIft	ssample20	Frequentist
Sample_percent	Subsample_accuracy	Pearson correlation	0.207408	0.95	0.0487679	0.355842	2.57932	148	0.0108738	Pearson correlation	150	normal	ALL	Random	R12-24	Evening	median	NP	ssample20	Frequentist
Sample_percent	Subsample_accuracy	Pearson correlation	-0.355948	0.95	-0.488351	-0.207524	-4.63377	148	7.81182e-06	Pearson correlation	150	normal	ALL	Random	R0-2	Full	mean	ACItf	ssample40	Frequentist
Sample_percent	Subsample_accuracy	Pearson correlation	-0.40146	0.95	-0.527766	-0.257784	-5.33256	148	3.55099e-07	Pearson correlation	150	normal	ALL	Random	R0-2	Full	mean	ACIft	ssample40	Frequentist
Sample_percent	Subsample_accuracy	Pearson correlation	0.148263	0.95	-0.0122902	0.301364	1.82386	148	0.0701907	Pearson correlation	150	normal	ALL	Random	R0-2	Full	mean	BI	ssample40	Frequentist
Sample_percent	Subsample_accuracy	Pearson correlation	-0.427651	0.95	-0.550204	-0.287064	-5.75545	148	4.80642e-08	Pearson correlation	150	normal	ALL	Random	R0-2	Full	mean	NP	ssample40	Frequentist
Sample_percent	Subsample_accuracy	Pearson correlation	0.322964	0.95	0.171584	0.459446	4.1515	148	5.55487e-05	Pearson correlation	150	normal	ALL	Random	R0-2	Full	mean	NDSI	ssample40	Frequentist
Sample_percent	Subsample_accuracy	Pearson correlation	-0.440105	0.95	-0.560812	-0.301079	-5.96262	148	1.7468e-08	Pearson correlation	150	normal	ALL	Random	R0-2	Full	median	ACItf	ssample40	Frequentist
Sample_percent	Subsample_accuracy	Pearson correlation	-0.457369	0.95	-0.575451	-0.320607	-6.25692	148	4.00835e-09	Pearson correlation	150	normal	ALL	Random	R0-2	Full	median	ACIft	ssample40	Frequentist
Sample_percent	Subsample_accuracy	Pearson correlation	0.112116	0.95	-0.049026	0.26757	1.37261	148	0.17195	Pearson correlation	150	normal	ALL	Random	R0-2	Full	median	BI	ssample40	Frequentist
Sample_percent	Subsample_accuracy	Pearson correlation	-0.915825	0.95	-0.945169	-0.871811	-20.2701	79	4.86096e-33	Pearson correlation	81	normal	ALL	Random	R0-2	Full	median	NP	ssample40	Frequentist
Sample_percent	Subsample_accuracy	Pearson correlation	0.285861	0.95	0.131087	0.427032	3.61681	147	0.000409268	Pearson correlation	149	normal	ALL	Random	R0-2	Full	median	NDSI	ssample40	Frequentist
Sample_percent	Subsample_accuracy	Pearson correlation	-0.387135	0.95	-0.515419	-0.241881	-5.10801	148	9.88248e-07	Pearson correlation	150	normal	ALL	Random	R0-2	Dawn	mean	ACItf	ssample40	Frequentist
Sample_percent	Subsample_accuracy	Pearson correlation	-0.122429	0.95	-0.277761	0.0391415	-1.49562	147	0.136895	Pearson correlation	149	normal	ALL	Random	R0-2	Dawn	mean	ACIft	ssample40	Frequentist
Sample_percent	Subsample_accuracy	Pearson correlation	-0.172545	0.95	-0.323851	-0.0126326	-2.13106	148	0.0347364	Pearson correlation	150	normal	ALL	Random	R0-2	Dawn	mean	BI	ssample40	Frequentist
Sample_percent	Subsample_accuracy	Pearson correlation	-0.0463195	0.95	-0.205059	0.114794	-0.564107	148	0.573535	Pearson correlation	150	normal	ALL	Random	R0-2	Dawn	mean	NP	ssample40	Frequentist
Sample_percent	Subsample_accuracy	Pearson correlation	0.0291067	0.95	-0.13177	0.188489	0.354248	148	0.723657	Pearson correlation	150	normal	ALL	Random	R0-2	Dawn	mean	NDSI	ssample40	Frequentist
Sample_percent	Subsample_accuracy	Pearson correlation	-0.378185	0.95	-0.507677	-0.231983	-4.96993	148	1.82879e-06	Pearson correlation	150	normal	ALL	Random	R0-2	Dawn	median	ACItf	ssample40	Frequentist
Sample_percent	Subsample_accuracy	Pearson correlation	-0.13679	0.95	-0.291185	0.0245501	-1.67423	147	0.0962125	Pearson correlation	149	normal	ALL	Random	R0-2	Dawn	median	ACIft	ssample40	Frequentist
Sample_percent	Subsample_accuracy	Pearson correlation	-0.177671	0.95	-0.328577	-0.0179196	-2.1964	148	0.029619	Pearson correlation	150	normal	ALL	Random	R0-2	Dawn	median	BI	ssample40	Frequentist
Sample_percent	Subsample_accuracy	Pearson correlation	0.286242	0.95	0.087644	0.462955	2.84982	91	0.00541025	Pearson correlation	93	normal	ALL	Random	R0-2	Dawn	median	NP	ssample40	Frequentist
Sample_percent	Subsample_accuracy	Pearson correlation	-0.0491314	0.95	-0.207757	0.112012	-0.598432	148	0.550466	Pearson correlation	150	normal	ALL	Random	R0-2	Dawn	median	NDSI	ssample40	Frequentist
Sample_percent	Subsample_accuracy	Pearson correlation	0.0208929	0.95	-0.139837	0.18055	0.254228	148	0.799672	Pearson correlation	150	normal	ALL	Random	R0-2	Evening	mean	ACItf	ssample40	Frequentist
Sample_percent	Subsample_accuracy	Pearson correlation	-0.349235	0.95	-0.482916	-0.199647	-4.51878	147	1.26941e-05	Pearson correlation	149	normal	ALL	Random	R0-2	Evening	mean	ACIft	ssample40	Frequentist
Sample_percent	Subsample_accuracy	Pearson correlation	0.0631776	0.95	-0.098077	0.221199	0.770127	148	0.442452	Pearson correlation	150	normal	ALL	Random	R0-2	Evening	mean	BI	ssample40	Frequentist
Sample_percent	Subsample_accuracy	Pearson correlation	-0.101231	0.95	-0.257318	0.0600039	-1.23789	148	0.217718	Pearson correlation	150	normal	ALL	Random	R0-2	Evening	mean	NP	ssample40	Frequentist
Sample_percent	Subsample_accuracy	Pearson correlation	0.0598866	0.95	-0.101348	0.218055	0.729862	148	0.466628	Pearson correlation	150	normal	ALL	Random	R0-2	Evening	mean	NDSI	ssample40	Frequentist
Sample_percent	Subsample_accuracy	Pearson correlation	-0.0798409	0.95	-0.237069	0.081463	-0.974417	148	0.33144	Pearson correlation	150	normal	ALL	Random	R0-2	Evening	median	ACItf	ssample40	Frequentist
Sample_percent	Subsample_accuracy	Pearson correlation	-0.341082	0.95	-0.475787	-0.190743	-4.3992	147	2.07437e-05	Pearson correlation	149	normal	ALL	Random	R0-2	Evening	median	ACIft	ssample40	Frequentist
Sample_percent	Subsample_accuracy	Pearson correlation	9.34481e-05	0.95	-0.16017	0.160353	0.00113684	148	0.999094	Pearson correlation	150	normal	ALL	Random	R0-2	Evening	median	BI	ssample40	Frequentist
Sample_percent	Subsample_accuracy	Pearson correlation	0.475891	0.95	0.274484	0.637298	4.52708	70	2.38973e-05	Pearson correlation	72	normal	ALL	Random	R0-2	Evening	median	NP	ssample40	Frequentist
Sample_percent	Subsample_accuracy	Pearson correlation	0.120304	0.95	-0.0407427	0.275259	1.47427	148	0.142532	Pearson correlation	150	normal	ALL	Random	R0-2	Evening	median	NDSI	ssample40	Frequentist
Sample_percent	Subsample_accuracy	Pearson correlation	-0.189724	0.95	-0.339658	-0.0303866	-2.35079	148	0.0200527	Pearson correlation	150	normal	ALL	Random	R0-24	Full	mean	ACItf	ssample40	Frequentist
Sample_percent	Subsample_accuracy	Pearson correlation	-0.245628	0.95	-0.391936	-0.0872028	-3.05124	145	0.00271096	Pearson correlation	147	normal	ALL	Random	R0-24	Full	mean	ACIft	ssample40	Frequentist
Sample_percent	Subsample_accuracy	Pearson correlation	-0.00890669	0.95	-0.168927	0.151571	-0.108359	148	0.913858	Pearson correlation	150	normal	ALL	Random	R0-24	Full	mean	NP	ssample40	Frequentist
Sample_percent	Subsample_accuracy	Pearson correlation	-0.34411	0.95	-0.478437	-0.194047	-4.44348	147	1.7313e-05	Pearson correlation	149	normal	ALL	Random	R0-24	Full	median	ACItf	ssample40	Frequentist
Sample_percent	Subsample_accuracy	Pearson correlation	-0.385086	0.95	-0.514466	-0.238565	-5.04184	146	1.34656e-06	Pearson correlation	148	normal	ALL	Random	R0-24	Full	median	ACIft	ssample40	Frequentist
Sample_percent	Subsample_accuracy	Pearson correlation	-0.121163	0.95	-0.276064	0.0398729	-1.48495	148	0.139684	Pearson correlation	150	normal	ALL	Random	R0-24	Full	median	NP	ssample40	Frequentist
Sample_percent	Subsample_accuracy	Pearson correlation	-0.120794	0.95	-0.276744	0.0413559	-1.47032	146	0.143626	Pearson correlation	148	normal	ALL	Random	R0-24	Dawn	mean	ACItf	ssample40	Frequentist
Sample_percent	Subsample_accuracy	Pearson correlation	-0.262424	0.95	-0.407501	-0.104428	-3.26347	144	0.00137474	Pearson correlation	146	normal	ALL	Random	R0-24	Dawn	mean	ACIft	ssample40	Frequentist
Sample_percent	Subsample_accuracy	Pearson correlation	-0.129991	0.95	-0.284329	0.0309149	-1.59494	148	0.11286	Pearson correlation	150	normal	ALL	Random	R0-24	Dawn	mean	NP	ssample40	Frequentist
Sample_percent	Subsample_accuracy	Pearson correlation	-0.0525492	0.95	-0.211561	0.109173	-0.638006	147	0.524462	Pearson correlation	149	normal	ALL	Random	R0-24	Dawn	median	ACItf	ssample40	Frequentist
Sample_percent	Subsample_accuracy	Pearson correlation	-0.290222	0.95	-0.431367	-0.135209	-3.66449	146	0.00034611	Pearson correlation	148	normal	ALL	Random	R0-24	Dawn	median	ACIft	ssample40	Frequentist
Sample_percent	Subsample_accuracy	Pearson correlation	-0.126328	0.95	-0.281411	0.0351869	-1.54401	147	0.124735	Pearson correlation	149	normal	ALL	Random	R0-24	Dawn	median	NP	ssample40	Frequentist
Sample_percent	Subsample_accuracy	Pearson correlation	-0.171461	0.95	-0.322851	-0.0115163	-2.11727	148	0.0359088	Pearson correlation	150	normal	ALL	Random	R0-24	Evening	mean	ACItf	ssample40	Frequentist
Sample_percent	Subsample_accuracy	Pearson correlation	-0.208039	0.95	-0.357879	-0.0477546	-2.56116	145	0.0114538	Pearson correlation	147	normal	ALL	Random	R0-24	Evening	mean	ACIft	ssample40	Frequentist
Sample_percent	Subsample_accuracy	Pearson correlation	0.150376	0.95	-0.0106822	0.303829	1.84418	147	0.0671695	Pearson correlation	149	normal	ALL	Random	R0-24	Evening	mean	NP	ssample40	Frequentist
Sample_percent	Subsample_accuracy	Pearson correlation	-0.164414	0.95	-0.31634	-0.00426459	-2.02777	148	0.0443775	Pearson correlation	150	normal	ALL	Random	R0-24	Evening	median	ACItf	ssample40	Frequentist
Sample_percent	Subsample_accuracy	Pearson correlation	-0.24957	0.95	-0.394537	-0.0924812	-3.12475	147	0.00214451	Pearson correlation	149	normal	ALL	Random	R0-24	Evening	median	ACIft	ssample40	Frequentist
Sample_percent	Subsample_accuracy	Pearson correlation	0.141876	0.95	-0.0193657	0.295925	1.73773	147	0.0843519	Pearson correlation	149	normal	ALL	Random	R0-24	Evening	median	NP	ssample40	Frequentist
Sample_percent	Subsample_accuracy	Pearson correlation	-0.226229	0.95	-0.372968	-0.0684488	-2.82544	148	0.00537377	Pearson correlation	150	normal	ALL	Random	R2-12	Full	mean	ACItf	ssample40	Frequentist
Sample_percent	Subsample_accuracy	Pearson correlation	-0.303457	0.95	-0.442658	-0.149976	-3.86131	147	0.000168504	Pearson correlation	149	normal	ALL	Random	R2-12	Full	mean	ACIft	ssample40	Frequentist
Sample_percent	Subsample_accuracy	Pearson correlation	-0.0249743	0.95	-0.184497	0.135831	-0.303921	148	0.761615	Pearson correlation	150	normal	ALL	Random	R2-12	Full	mean	NP	ssample40	Frequentist
Sample_percent	Subsample_accuracy	Pearson correlation	-0.332822	0.95	-0.468115	-0.182284	-4.29375	148	3.16312e-05	Pearson correlation	150	normal	ALL	Random	R2-12	Full	median	ACItf	ssample40	Frequentist
Sample_percent	Subsample_accuracy	Pearson correlation	-0.372099	0.95	-0.503652	-0.223681	-4.8273	145	3.47231e-06	Pearson correlation	147	normal	ALL	Random	R2-12	Full	median	ACIft	ssample40	Frequentist
Sample_percent	Subsample_accuracy	Pearson correlation	0.220916	0.95	0.062881	0.368144	2.75565	148	0.0065941	Pearson correlation	150	normal	ALL	Random	R2-12	Full	median	NP	ssample40	Frequentist
Sample_percent	Subsample_accuracy	Pearson correlation	-0.255318	0.95	-0.399243	-0.0991119	-3.21255	148	0.00161455	Pearson correlation	150	normal	ALL	Random	R2-12	Dawn	mean	ACItf	ssample40	Frequentist
Sample_percent	Subsample_accuracy	Pearson correlation	-0.371811	0.95	-0.502981	-0.223899	-4.83957	146	3.27395e-06	Pearson correlation	148	normal	ALL	Random	R2-12	Dawn	mean	ACIft	ssample40	Frequentist
Sample_percent	Subsample_accuracy	Pearson correlation	0.0530128	0.95	-0.108168	0.211478	0.645837	148	0.519385	Pearson correlation	150	normal	ALL	Random	R2-12	Dawn	mean	NP	ssample40	Frequentist
Sample_percent	Subsample_accuracy	Pearson correlation	-0.204101	0.95	-0.353305	-0.04477	-2.5278	147	0.0125347	Pearson correlation	149	normal	ALL	Random	R2-12	Dawn	median	ACItf	ssample40	Frequentist
Sample_percent	Subsample_accuracy	Pearson correlation	-0.378534	0.95	-0.508389	-0.231846	-4.95845	147	1.93568e-06	Pearson correlation	149	normal	ALL	Random	R2-12	Dawn	median	ACIft	ssample40	Frequentist
Sample_percent	Subsample_accuracy	Pearson correlation	0.0366788	0.95	-0.124314	0.195789	0.446517	148	0.655877	Pearson correlation	150	normal	ALL	Random	R2-12	Dawn	median	NP	ssample40	Frequentist
Sample_percent	Subsample_accuracy	Pearson correlation	-0.0818013	0.95	-0.238931	0.0795024	-0.998503	148	0.319665	Pearson correlation	150	normal	ALL	Random	R2-12	Evening	mean	ACItf	ssample40	Frequentist
Sample_percent	Subsample_accuracy	Pearson correlation	-0.0624232	0.95	-0.222072	0.100486	-0.753143	145	0.452585	Pearson correlation	147	normal	ALL	Random	R2-12	Evening	mean	ACIft	ssample40	Frequentist
Sample_percent	Subsample_accuracy	Pearson correlation	-0.159642	0.95	-0.311923	0.000635521	-1.96736	148	0.0510109	Pearson correlation	150	normal	ALL	Random	R2-12	Evening	mean	NP	ssample40	Frequentist
Sample_percent	Subsample_accuracy	Pearson correlation	-0.0980802	0.95	-0.254344	0.0631743	-1.19898	148	0.232452	Pearson correlation	150	normal	ALL	Random	R2-12	Evening	median	ACItf	ssample40	Frequentist
Sample_percent	Subsample_accuracy	Pearson correlation	-0.145301	0.95	-0.298609	0.0153173	-1.78662	148	0.0760455	Pearson correlation	150	normal	ALL	Random	R2-12	Evening	median	ACIft	ssample40	Frequentist
Sample_percent	Subsample_accuracy	Pearson correlation	-0.0941043	0.95	-0.250587	0.0671702	-1.14993	148	0.252027	Pearson correlation	150	normal	ALL	Random	R2-12	Evening	median	NP	ssample40	Frequentist
Sample_percent	Subsample_accuracy	Pearson correlation	-0.160229	0.95	-0.312965	0.000586066	-1.9681	147	0.0509378	Pearson correlation	149	normal	ALL	Random	R12-24	Full	mean	ACItf	ssample40	Frequentist
Sample_percent	Subsample_accuracy	Pearson correlation	-0.0801566	0.95	-0.238417	0.082251	-0.971662	146	0.332826	Pearson correlation	148	normal	ALL	Random	R12-24	Full	mean	ACIft	ssample40	Frequentist
Sample_percent	Subsample_accuracy	Pearson correlation	-0.0196643	0.95	-0.180436	0.14213	-0.237651	146	0.812485	Pearson correlation	148	normal	ALL	Random	R12-24	Full	mean	NP	ssample40	Frequentist
Sample_percent	Subsample_accuracy	Pearson correlation	-0.271033	0.95	-0.413341	-0.115802	-3.42547	148	0.000794473	Pearson correlation	150	normal	ALL	Random	R12-24	Full	median	ACItf	ssample40	Frequentist
Sample_percent	Subsample_accuracy	Pearson correlation	-0.31309	0.95	-0.451175	-0.160363	-3.99696	147	0.000101171	Pearson correlation	149	normal	ALL	Random	R12-24	Full	median	ACIft	ssample40	Frequentist
Sample_percent	Subsample_accuracy	Pearson correlation	0.0828939	0.95	-0.0784093	0.239968	1.01193	148	0.313223	Pearson correlation	150	normal	ALL	Random	R12-24	Full	median	NP	ssample40	Frequentist
Sample_percent	Subsample_accuracy	Pearson correlation	-0.0202147	0.95	-0.179893	0.140502	-0.245973	148	0.806044	Pearson correlation	150	normal	ALL	Random	R12-24	Dawn	mean	ACItf	ssample40	Frequentist
Sample_percent	Subsample_accuracy	Pearson correlation	-0.165937	0.95	-0.318246	-0.00527824	-2.04017	147	0.0431238	Pearson correlation	149	normal	ALL	Random	R12-24	Dawn	mean	ACIft	ssample40	Frequentist
Sample_percent	Subsample_accuracy	Pearson correlation	-0.274262	0.95	-0.416229	-0.119242	-3.46959	148	0.000683088	Pearson correlation	150	normal	ALL	Random	R12-24	Dawn	mean	NP	ssample40	Frequentist
Sample_percent	Subsample_accuracy	Pearson correlation	0.0265772	0.95	-0.134256	0.186046	0.32344	148	0.746819	Pearson correlation	150	normal	ALL	Random	R12-24	Dawn	median	ACItf	ssample40	Frequentist
Sample_percent	Subsample_accuracy	Pearson correlation	-0.220741	0.95	-0.367984	-0.0626971	-2.75334	148	0.00663837	Pearson correlation	150	normal	ALL	Random	R12-24	Dawn	median	ACIft	ssample40	Frequentist
Sample_percent	Subsample_accuracy	Pearson correlation	-0.22124	0.95	-0.368916	-0.0626699	-2.75056	147	0.00669746	Pearson correlation	149	normal	ALL	Random	R12-24	Dawn	median	NP	ssample40	Frequentist
Sample_percent	Subsample_accuracy	Pearson correlation	-0.187934	0.95	-0.338015	-0.0285315	-2.32779	148	0.0212781	Pearson correlation	150	normal	ALL	Random	R12-24	Evening	mean	ACItf	ssample40	Frequentist
Sample_percent	Subsample_accuracy	Pearson correlation	-0.292402	0.95	-0.433762	-0.136993	-3.6819	145	0.000325906	Pearson correlation	147	normal	ALL	Random	R12-24	Evening	mean	ACIft	ssample40	Frequentist
Sample_percent	Subsample_accuracy	Pearson correlation	0.196747	0.95	0.0376736	0.346096	2.44125	148	0.0158162	Pearson correlation	150	normal	ALL	Random	R12-24	Evening	mean	NP	ssample40	Frequentist
Sample_percent	Subsample_accuracy	Pearson correlation	-0.140229	0.95	-0.293886	0.0204935	-1.72298	148	0.0869809	Pearson correlation	150	normal	ALL	Random	R12-24	Evening	median	ACItf	ssample40	Frequentist
Sample_percent	Subsample_accuracy	Pearson correlation	-0.253933	0.95	-0.399406	-0.0959853	-3.16138	145	0.00191233	Pearson correlation	147	normal	ALL	Random	R12-24	Evening	median	ACIft	ssample40	Frequentist
Sample_percent	Subsample_accuracy	Pearson correlation	0.289358	0.95	0.134832	0.430144	3.66507	147	0.00034465	Pearson correlation	149	normal	ALL	Random	R12-24	Evening	median	NP	ssample40	Frequentist
Sample_percent	Subsample_accuracy	Pearson correlation	-0.0780907	0.95	-0.235406	0.0832122	-0.952924	148	0.342182	Pearson correlation	150	normal	ALL	Random	R0-2	Full	mean	ACItf	ssample80	Frequentist
Sample_percent	Subsample_accuracy	Pearson correlation	-0.204431	0.95	-0.353123	-0.0456652	-2.54066	148	0.0120947	Pearson correlation	150	normal	ALL	Random	R0-2	Full	mean	ACIft	ssample80	Frequentist
Sample_percent	Subsample_accuracy	Pearson correlation	-0.100145	0.95	-0.256293	0.061097	-1.22447	148	0.222719	Pearson correlation	150	normal	ALL	Random	R0-2	Full	mean	BI	ssample80	Frequentist
Sample_percent	Subsample_accuracy	Pearson correlation	-0.1464	0.95	-0.299632	0.0141943	-1.80044	148	0.0738284	Pearson correlation	150	normal	ALL	Random	R0-2	Full	mean	NP	ssample80	Frequentist
Sample_percent	Subsample_accuracy	Pearson correlation	0.023613	0.95	-0.137168	0.183181	0.287345	148	0.77425	Pearson correlation	150	normal	ALL	Random	R0-2	Full	mean	NDSI	ssample80	Frequentist
Sample_percent	Subsample_accuracy	Pearson correlation	0.0074076	0.95	-0.153036	0.16747	0.0901198	148	0.928314	Pearson correlation	150	normal	ALL	Random	R0-2	Full	median	ACItf	ssample80	Frequentist
Sample_percent	Subsample_accuracy	Pearson correlation	-0.136829	0.95	-0.290715	0.0239581	-1.6804	148	0.0949893	Pearson correlation	150	normal	ALL	Random	R0-2	Full	median	ACIft	ssample80	Frequentist
Sample_percent	Subsample_accuracy	Pearson correlation	-0.00114177	0.95	-0.161374	0.159149	-0.0138903	148	0.988936	Pearson correlation	150	normal	ALL	Random	R0-2	Full	median	BI	ssample80	Frequentist
Sample_percent	Subsample_accuracy	Pearson correlation	-0.406117	0.95	-0.558023	-0.227877	-4.3995	98	2.76181e-05	Pearson correlation	100	normal	ALL	Random	R0-2	Full	median	NP	ssample80	Frequentist
Sample_percent	Subsample_accuracy	Pearson correlation	0.177715	0.95	0.0179655	0.328618	2.19697	148	0.0295777	Pearson correlation	150	normal	ALL	Random	R0-2	Full	median	NDSI	ssample80	Frequentist
Sample_percent	Subsample_accuracy	Pearson correlation	0.331823	0.95	0.181197	0.467238	4.27926	148	3.35186e-05	Pearson correlation	150	normal	ALL	Random	R0-2	Dawn	mean	ACItf	ssample80	Frequentist
Sample_percent	Subsample_accuracy	Pearson correlation	0.0215647	0.95	-0.139178	0.1812	0.262406	148	0.793373	Pearson correlation	150	normal	ALL	Random	R0-2	Dawn	mean	ACIft	ssample80	Frequentist
Sample_percent	Subsample_accuracy	Pearson correlation	0.20804	0.95	0.049426	0.356418	2.58753	148	0.0106293	Pearson correlation	150	normal	ALL	Random	R0-2	Dawn	mean	BI	ssample80	Frequentist
Sample_percent	Subsample_accuracy	Pearson correlation	0.12169	0.95	-0.0393387	0.276558	1.49151	148	0.137957	Pearson correlation	150	normal	ALL	Random	R0-2	Dawn	mean	NP	ssample80	Frequentist
Sample_percent	Subsample_accuracy	Pearson correlation	0.00302008	0.95	-0.157318	0.163203	0.0367411	148	0.970741	Pearson correlation	150	normal	ALL	Random	R0-2	Dawn	mean	NDSI	ssample80	Frequentist
Sample_percent	Subsample_accuracy	Pearson correlation	0.307261	0.95	0.154613	0.445581	3.92801	148	0.000130969	Pearson correlation	150	normal	ALL	Random	R0-2	Dawn	median	ACItf	ssample80	Frequentist
Sample_percent	Subsample_accuracy	Pearson correlation	0.0290227	0.95	-0.131852	0.188408	0.353226	148	0.724422	Pearson correlation	150	normal	ALL	Random	R0-2	Dawn	median	ACIft	ssample80	Frequentist
Sample_percent	Subsample_accuracy	Pearson correlation	0.189357	0.95	0.0300061	0.339321	2.34607	148	0.0202989	Pearson correlation	150	normal	ALL	Random	R0-2	Dawn	median	BI	ssample80	Frequentist
Sample_percent	Subsample_accuracy	Pearson correlation	0.0645557	0.95	-0.108168	0.233496	0.734744	129	0.463829	Pearson correlation	131	normal	ALL	Random	R0-2	Dawn	median	NP	ssample80	Frequentist
Sample_percent	Subsample_accuracy	Pearson correlation	0.0398354	0.95	-0.1212	0.198828	0.485003	148	0.628391	Pearson correlation	150	normal	ALL	Random	R0-2	Dawn	median	NDSI	ssample80	Frequentist
Sample_percent	Subsample_accuracy	Pearson correlation	0.0897913	0.95	-0.0714991	0.246506	1.09679	148	0.274515	Pearson correlation	150	normal	ALL	Random	R0-2	Evening	mean	ACItf	ssample80	Frequentist
Sample_percent	Subsample_accuracy	Pearson correlation	0.172703	0.95	0.0127958	0.323997	2.13308	148	0.0345678	Pearson correlation	150	normal	ALL	Random	R0-2	Evening	mean	ACIft	ssample80	Frequentist
Sample_percent	Subsample_accuracy	Pearson correlation	-0.0833419	0.95	-0.240393	0.0779609	-1.01744	148	0.310606	Pearson correlation	150	normal	ALL	Random	R0-2	Evening	mean	BI	ssample80	Frequentist
Sample_percent	Subsample_accuracy	Pearson correlation	-0.0832322	0.95	-0.240809	0.07862	-1.01265	147	0.312891	Pearson correlation	149	normal	ALL	Random	R0-2	Evening	mean	NP	ssample80	Frequentist
Sample_percent	Subsample_accuracy	Pearson correlation	0.023256	0.95	-0.137518	0.182836	0.282997	148	0.777574	Pearson correlation	150	normal	ALL	Random	R0-2	Evening	mean	NDSI	ssample80	Frequentist
Sample_percent	Subsample_accuracy	Pearson correlation	0.158625	0.95	-0.00167892	0.310981	1.95451	148	0.0525261	Pearson correlation	150	normal	ALL	Random	R0-2	Evening	median	ACItf	ssample80	Frequentist
Sample_percent	Subsample_accuracy	Pearson correlation	0.163848	0.95	0.00368323	0.315817	2.0206	148	0.0451243	Pearson correlation	150	normal	ALL	Random	R0-2	Evening	median	ACIft	ssample80	Frequentist
Sample_percent	Subsample_accuracy	Pearson correlation	0.0721556	0.95	-0.0891367	0.22976	0.880105	148	0.380229	Pearson correlation	150	normal	ALL	Random	R0-2	Evening	median	BI	ssample80	Frequentist
Sample_percent	Subsample_accuracy	Pearson correlation	0.52128	0.95	0.385238	0.635147	6.99136	131	1.25052e-10	Pearson correlation	133	normal	ALL	Random	R0-2	Evening	median	NP	ssample80	Frequentist
Sample_percent	Subsample_accuracy	Pearson correlation	0.115334	0.95	-0.0457731	0.270594	1.41253	148	0.159893	Pearson correlation	150	normal	ALL	Random	R0-2	Evening	median	NDSI	ssample80	Frequentist
Sample_percent	Subsample_accuracy	Pearson correlation	-0.189947	0.95	-0.339863	-0.0306176	-2.35366	148	0.0199045	Pearson correlation	150	normal	ALL	Random	R0-24	Full	mean	ACItf	ssample80	Frequentist
Sample_percent	Subsample_accuracy	Pearson correlation	-0.0196238	0.95	-0.182051	0.143846	-0.234712	143	0.814768	Pearson correlation	145	normal	ALL	Random	R0-24	Full	mean	ACIft	ssample80	Frequentist
Sample_percent	Subsample_accuracy	Pearson correlation	0.00189123	0.95	-0.158418	0.162104	0.0230078	148	0.981675	Pearson correlation	150	normal	ALL	Random	R0-24	Full	mean	NP	ssample80	Frequentist
Sample_percent	Subsample_accuracy	Pearson correlation	-0.0210137	0.95	-0.180667	0.139718	-0.255699	148	0.798538	Pearson correlation	150	normal	ALL	Random	R0-24	Full	median	ACItf	ssample80	Frequentist
Sample_percent	Subsample_accuracy	Pearson correlation	0.0652596	0.95	-0.0982301	0.225319	0.784788	144	0.433867	Pearson correlation	146	normal	ALL	Random	R0-24	Full	median	ACIft	ssample80	Frequentist
Sample_percent	Subsample_accuracy	Pearson correlation	-0.0526522	0.95	-0.21166	0.109071	-0.639261	147	0.523648	Pearson correlation	149	normal	ALL	Random	R0-24	Full	median	NP	ssample80	Frequentist
Sample_percent	Subsample_accuracy	Pearson correlation	0.165181	0.95	0.00505317	0.317049	2.0375	148	0.0433814	Pearson correlation	150	normal	ALL	Random	R0-24	Dawn	mean	ACItf	ssample80	Frequentist
Sample_percent	Subsample_accuracy	Pearson correlation	0.0992914	0.95	-0.0630627	0.256526	1.2057	146	0.229883	Pearson correlation	148	normal	ALL	Random	R0-24	Dawn	mean	ACIft	ssample80	Frequentist
Sample_percent	Subsample_accuracy	Pearson correlation	0.110709	0.95	-0.0509984	0.26676	1.35058	147	0.178905	Pearson correlation	149	normal	ALL	Random	R0-24	Dawn	mean	NP	ssample80	Frequentist
Sample_percent	Subsample_accuracy	Pearson correlation	0.140688	0.95	-0.0200249	0.294314	1.72874	148	0.0859412	Pearson correlation	150	normal	ALL	Random	R0-24	Dawn	median	ACItf	ssample80	Frequentist
Sample_percent	Subsample_accuracy	Pearson correlation	0.128353	0.95	-0.0365658	0.286466	1.53682	141	0.126578	Pearson correlation	143	normal	ALL	Random	R0-24	Dawn	median	ACIft	ssample80	Frequentist
Sample_percent	Subsample_accuracy	Pearson correlation	0.203477	0.95	0.0441203	0.352735	2.51974	147	0.012813	Pearson correlation	149	normal	ALL	Random	R0-24	Dawn	median	NP	ssample80	Frequentist
Sample_percent	Subsample_accuracy	Pearson correlation	0.115516	0.95	-0.0455895	0.270765	1.41478	148	0.159232	Pearson correlation	150	normal	ALL	Random	R0-24	Evening	mean	ACItf	ssample80	Frequentist
Sample_percent	Subsample_accuracy	Pearson correlation	0.239274	0.95	0.08106	0.385727	2.97766	146	0.00340179	Pearson correlation	148	normal	ALL	Random	R0-24	Evening	mean	ACIft	ssample80	Frequentist
Sample_percent	Subsample_accuracy	Pearson correlation	0.0324515	0.95	-0.128478	0.191716	0.394998	148	0.693413	Pearson correlation	150	normal	ALL	Random	R0-24	Evening	mean	NP	ssample80	Frequentist
Sample_percent	Subsample_accuracy	Pearson correlation	0.103405	0.95	-0.0583655	0.259884	1.26048	147	0.209495	Pearson correlation	149	normal	ALL	Random	R0-24	Evening	median	ACItf	ssample80	Frequentist
Sample_percent	Subsample_accuracy	Pearson correlation	0.238454	0.95	0.0801956	0.384986	2.96683	146	0.00351671	Pearson correlation	148	normal	ALL	Random	R0-24	Evening	median	ACIft	ssample80	Frequentist
Sample_percent	Subsample_accuracy	Pearson correlation	0.0332068	0.95	-0.127734	0.192444	0.404201	148	0.686648	Pearson correlation	150	normal	ALL	Random	R0-24	Evening	median	NP	ssample80	Frequentist
Sample_percent	Subsample_accuracy	Pearson correlation	0.0905108	0.95	-0.0707774	0.247187	1.10565	148	0.270672	Pearson correlation	150	normal	ALL	Random	R2-12	Full	mean	ACItf	ssample80	Frequentist
Sample_percent	Subsample_accuracy	Pearson correlation	0.183451	0.95	0.0222178	0.335384	2.24718	145	0.0261383	Pearson correlation	147	normal	ALL	Random	R2-12	Full	mean	ACIft	ssample80	Frequentist
Sample_percent	Subsample_accuracy	Pearson correlation	-0.418769	0.95	-0.542614	-0.277105	-5.61016	148	9.65351e-08	Pearson correlation	150	normal	ALL	Random	R2-12	Full	mean	NP	ssample80	Frequentist
Sample_percent	Subsample_accuracy	Pearson correlation	0.208291	0.95	0.0496879	0.356647	2.59079	148	0.0105334	Pearson correlation	150	normal	ALL	Random	R2-12	Full	median	ACItf	ssample80	Frequentist
Sample_percent	Subsample_accuracy	Pearson correlation	0.226182	0.95	0.067294	0.373882	2.80568	146	0.0057061	Pearson correlation	148	normal	ALL	Random	R2-12	Full	median	ACIft	ssample80	Frequentist
Sample_percent	Subsample_accuracy	Pearson correlation	-0.433774	0.95	-0.555424	-0.293947	-5.85678	148	2.93715e-08	Pearson correlation	150	normal	ALL	Random	R2-12	Full	median	NP	ssample80	Frequentist
Sample_percent	Subsample_accuracy	Pearson correlation	0.242869	0.95	0.0854045	0.388497	3.03552	147	0.00284093	Pearson correlation	149	normal	ALL	Random	R2-12	Dawn	mean	ACItf	ssample80	Frequentist
Sample_percent	Subsample_accuracy	Pearson correlation	0.218884	0.95	0.059084	0.367746	2.70121	145	0.00773219	Pearson correlation	147	normal	ALL	Random	R2-12	Dawn	mean	ACIft	ssample80	Frequentist
Sample_percent	Subsample_accuracy	Pearson correlation	-0.0542649	0.95	-0.213205	0.107473	-0.658898	147	0.510992	Pearson correlation	149	normal	ALL	Random	R2-12	Dawn	mean	NP	ssample80	Frequentist
Sample_percent	Subsample_accuracy	Pearson correlation	0.212099	0.95	0.0536612	0.360119	2.64036	148	0.00916996	Pearson correlation	150	normal	ALL	Random	R2-12	Dawn	median	ACItf	ssample80	Frequentist
Sample_percent	Subsample_accuracy	Pearson correlation	0.210892	0.95	0.051293	0.359987	2.60684	146	0.0100863	Pearson correlation	148	normal	ALL	Random	R2-12	Dawn	median	ACIft	ssample80	Frequentist
Sample_percent	Subsample_accuracy	Pearson correlation	0.00776123	0.95	-0.15269	0.167814	0.0944223	148	0.924901	Pearson correlation	150	normal	ALL	Random	R2-12	Dawn	median	NP	ssample80	Frequentist
Sample_percent	Subsample_accuracy	Pearson correlation	0.0734253	0.95	-0.0878703	0.230969	0.895675	148	0.371881	Pearson correlation	150	normal	ALL	Random	R2-12	Evening	mean	ACItf	ssample80	Frequentist
Sample_percent	Subsample_accuracy	Pearson correlation	0.260227	0.95	0.103216	0.404584	3.25653	146	0.00140235	Pearson correlation	148	normal	ALL	Random	R2-12	Evening	mean	ACIft	ssample80	Frequentist
Sample_percent	Subsample_accuracy	Pearson correlation	0.0909463	0.95	-0.0703404	0.247599	1.11101	148	0.268364	Pearson correlation	150	normal	ALL	Random	R2-12	Evening	mean	NP	ssample80	Frequentist
Sample_percent	Subsample_accuracy	Pearson correlation	0.0960242	0.95	-0.0652413	0.252402	1.17361	148	0.242437	Pearson correlation	150	normal	ALL	Random	R2-12	Evening	median	ACItf	ssample80	Frequentist
Sample_percent	Subsample_accuracy	Pearson correlation	0.240761	0.95	0.0837298	0.386124	3.01775	148	0.00299921	Pearson correlation	150	normal	ALL	Random	R2-12	Evening	median	ACIft	ssample80	Frequentist
Sample_percent	Subsample_accuracy	Pearson correlation	0.108564	0.95	-0.052613	0.264228	1.32859	148	0.186028	Pearson correlation	150	normal	ALL	Random	R2-12	Evening	median	NP	ssample80	Frequentist
Sample_percent	Subsample_accuracy	Pearson correlation	-0.252341	0.95	-0.396565	-0.0959599	-3.17253	148	0.00183789	Pearson correlation	150	normal	ALL	Random	R12-24	Full	mean	ACItf	ssample80	Frequentist
Sample_percent	Subsample_accuracy	Pearson correlation	-0.14084	0.95	-0.296504	0.0221147	-1.70709	144	0.0899603	Pearson correlation	146	normal	ALL	Random	R12-24	Full	mean	ACIft	ssample80	Frequentist
Sample_percent	Subsample_accuracy	Pearson correlation	-0.0936589	0.95	-0.250165	0.0676176	-1.14444	148	0.254289	Pearson correlation	150	normal	ALL	Random	R12-24	Full	mean	NP	ssample80	Frequentist
Sample_percent	Subsample_accuracy	Pearson correlation	-0.128791	0.95	-0.283716	0.0326857	-1.57462	147	0.117493	Pearson correlation	149	normal	ALL	Random	R12-24	Full	median	ACItf	ssample80	Frequentist
Sample_percent	Subsample_accuracy	Pearson correlation	0.00206953	0.95	-0.159328	0.163359	0.0250063	146	0.980084	Pearson correlation	148	normal	ALL	Random	R12-24	Full	median	ACIft	ssample80	Frequentist
Sample_percent	Subsample_accuracy	Pearson correlation	0.14096	0.95	-0.0208583	0.295581	1.7204	146	0.0874779	Pearson correlation	148	normal	ALL	Random	R12-24	Full	median	NP	ssample80	Frequentist
Sample_percent	Subsample_accuracy	Pearson correlation	0.149658	0.95	-0.0108639	0.302661	1.84141	148	0.0675636	Pearson correlation	150	normal	ALL	Random	R12-24	Dawn	mean	ACItf	ssample80	Frequentist
Sample_percent	Subsample_accuracy	Pearson correlation	0.00984825	0.95	-0.150651	0.169842	0.119815	148	0.904792	Pearson correlation	150	normal	ALL	Random	R12-24	Dawn	mean	ACIft	ssample80	Frequentist
Sample_percent	Subsample_accuracy	Pearson correlation	0.20605	0.95	0.0468006	0.355085	2.55301	147	0.0116991	Pearson correlation	149	normal	ALL	Random	R12-24	Dawn	mean	NP	ssample80	Frequentist
Sample_percent	Subsample_accuracy	Pearson correlation	0.130415	0.95	-0.0304836	0.284726	1.60023	148	0.111679	Pearson correlation	150	normal	ALL	Random	R12-24	Dawn	median	ACItf	ssample80	Frequentist
Sample_percent	Subsample_accuracy	Pearson correlation	0.0837552	0.95	-0.0775472	0.240785	1.02252	148	0.308204	Pearson correlation	150	normal	ALL	Random	R12-24	Dawn	median	ACIft	ssample80	Frequentist
Sample_percent	Subsample_accuracy	Pearson correlation	0.253445	0.95	0.0971287	0.397559	3.18736	148	0.00175196	Pearson correlation	150	normal	ALL	Random	R12-24	Dawn	median	NP	ssample80	Frequentist
Sample_percent	Subsample_accuracy	Pearson correlation	0.171559	0.95	0.0110645	0.323437	2.11135	147	0.0364343	Pearson correlation	149	normal	ALL	Random	R12-24	Evening	mean	ACItf	ssample80	Frequentist
Sample_percent	Subsample_accuracy	Pearson correlation	0.186311	0.95	0.0246071	0.338514	2.27557	144	0.0243474	Pearson correlation	146	normal	ALL	Random	R12-24	Evening	mean	ACIft	ssample80	Frequentist
Sample_percent	Subsample_accuracy	Pearson correlation	-0.0588671	0.95	-0.217607	0.102907	-0.714966	147	0.475764	Pearson correlation	149	normal	ALL	Random	R12-24	Evening	mean	NP	ssample80	Frequentist
Sample_percent	Subsample_accuracy	Pearson correlation	0.163228	0.95	0.00249354	0.315741	2.00594	147	0.0466976	Pearson correlation	149	normal	ALL	Random	R12-24	Evening	median	ACItf	ssample80	Frequentist
Sample_percent	Subsample_accuracy	Pearson correlation	0.197096	0.95	0.0374839	0.346902	2.43747	147	0.0159839	Pearson correlation	149	normal	ALL	Random	R12-24	Evening	median	ACIft	ssample80	Frequentist
Sample_percent	Subsample_accuracy	Pearson correlation	-0.0403204	0.95	-0.199294	0.120721	-0.490918	148	0.624212	Pearson correlation	150	normal	ALL	Random	R12-24	Evening	median	NP	ssample80	Frequentist
Sample_percent	Subsample_accuracy	Pearson correlation	0.99956	0.95			33.6975	1	0.0188867	Pearson correlation	3	normal	ALL	Tessells	R12-24	Full	mean	ACItf	Landcover	Frequentist
Sample_percent	Subsample_accuracy	Pearson correlation	0.916095	0.95			2.28475	1	0.262647	Pearson correlation	3	normal	ALL	Tessells	R12-24	Full	mean	NP	Landcover	Frequentist
Sample_percent	Subsample_accuracy	Pearson correlation	0.616757	0.95			0.783528	1	0.576892	Pearson correlation	3	normal	ALL	Tessells	R12-24	Full	median	ACItf	Landcover	Frequentist
Sample_percent	Subsample_accuracy	Pearson correlation	0.93936	0.95			2.73919	1	0.222841	Pearson correlation	3	normal	ALL	Tessells	R12-24	Full	median	ACIft	Landcover	Frequentist
Sample_percent	Subsample_accuracy	Pearson correlation	0.978731	0.95			4.77083	1	0.131536	Pearson correlation	3	normal	ALL	Tessells	R12-24	Full	median	NP	Landcover	Frequentist
Sample_percent	Subsample_accuracy	Pearson correlation	0.0465866	0.95			0.0466373	1	0.970331	Pearson correlation	3	normal	ALL	Tessells	R12-24	Dawn	mean	ACItf	Landcover	Frequentist
Sample_percent	Subsample_accuracy	Pearson correlation	0.992309	0.95			8.01655	1	0.0790051	Pearson correlation	3	normal	ALL	Tessells	R12-24	Dawn	mean	ACIft	Landcover	Frequentist
Sample_percent	Subsample_accuracy	Pearson correlation	0.979129	0.95			4.81762	1	0.130294	Pearson correlation	3	normal	ALL	Tessells	R12-24	Dawn	mean	NP	Landcover	Frequentist
Sample_percent	Subsample_accuracy	Pearson correlation	-0.109026	0.95			-0.109679	1	0.930454	Pearson correlation	3	normal	ALL	Tessells	R12-24	Dawn	median	ACItf	Landcover	Frequentist
Sample_percent	Subsample_accuracy	Pearson correlation	0.935325	0.95			2.64373	1	0.230214	Pearson correlation	3	normal	ALL	Tessells	R12-24	Dawn	median	ACIft	Landcover	Frequentist
Sample_percent	Subsample_accuracy	Pearson correlation	0.996527	0.95			11.9672	1	0.0530739	Pearson correlation	3	normal	ALL	Tessells	R12-24	Dawn	median	NP	Landcover	Frequentist
Sample_percent	Subsample_accuracy	Pearson correlation	0.496047	0.95			0.571288	1	0.669569	Pearson correlation	3	normal	ALL	Tessells	R12-24	Evening	mean	ACItf	Landcover	Frequentist
Sample_percent	Subsample_accuracy	Pearson correlation	0.99346	0.95			8.70064	1	0.0728496	Pearson correlation	3	normal	ALL	Tessells	R12-24	Evening	mean	ACIft	Landcover	Frequentist
Sample_percent	Subsample_accuracy	Pearson correlation	0.706102	0.95			0.997165	1	0.500904	Pearson correlation	3	normal	ALL	Tessells	R12-24	Evening	mean	NP	Landcover	Frequentist
Sample_percent	Subsample_accuracy	Pearson correlation	0.199158	0.95			0.203229	1	0.872359	Pearson correlation	3	normal	ALL	Tessells	R12-24	Evening	median	ACItf	Landcover	Frequentist
Sample_percent	Subsample_accuracy	Pearson correlation	0.71192	0.95			1.01375	1	0.495652	Pearson correlation	3	normal	ALL	Tessells	R12-24	Evening	median	NP	Landcover	Frequentist
Sample_percent	Subsample_accuracy	Pearson correlation	0.973626	0.95			4.26745	1	0.146536	Pearson correlation	3	normal	ALL	Tessells	R0-2	Evening	mean	ACItf	Landcover	Frequentist
Sample_percent	Subsample_accuracy	Pearson correlation	0.985936	0.95			5.89945	1	0.106896	Pearson correlation	3	normal	ALL	Tessells	R0-2	Evening	mean	ACIft	Landcover	Frequentist
Sample_percent	Subsample_accuracy	Pearson correlation	0.900245	0.95			2.0677	1	0.286775	Pearson correlation	3	normal	ALL	Tessells	R0-2	Evening	mean	BI	Landcover	Frequentist
Sample_percent	Subsample_accuracy	Pearson correlation	0.984069	0.95			5.53515	1	0.113787	Pearson correlation	3	normal	ALL	Tessells	R0-2	Evening	mean	NP	Landcover	Frequentist
Sample_percent	Subsample_accuracy	Pearson correlation	0.954029	0.95			3.18314	1	0.193782	Pearson correlation	3	normal	ALL	Tessells	R0-2	Evening	mean	NDSI	Landcover	Frequentist
Sample_percent	Subsample_accuracy	Pearson correlation	0.693717	0.95			0.963164	1	0.511944	Pearson correlation	3	normal	ALL	Tessells	R0-2	Evening	median	ACItf	Landcover	Frequentist
Sample_percent	Subsample_accuracy	Pearson correlation	0.99735	0.95			13.7079	1	0.0463596	Pearson correlation	3	normal	ALL	Tessells	R0-2	Evening	median	ACIft	Landcover	Frequentist
Sample_percent	Subsample_accuracy	Pearson correlation	0.936356	0.95			2.66729	1	0.228351	Pearson correlation	3	normal	ALL	Tessells	R0-2	Evening	median	BI	Landcover	Frequentist
Sample_percent	Subsample_accuracy	Pearson correlation	0.886657	0.95			1.91739	1	0.306043	Pearson correlation	3	normal	ALL	Tessells	R0-2	Evening	median	NDSI	Landcover	Frequentist
Sample_percent	Subsample_accuracy	Pearson correlation	0.973524	0.95			4.25892	1	0.14682	Pearson correlation	3	normal	ALL	Tessells	R0-24	Full	mean	ACItf	Landcover	Frequentist
Sample_percent	Subsample_accuracy	Pearson correlation	0.974314	0.95			4.32657	1	0.144603	Pearson correlation	3	normal	ALL	Tessells	R0-24	Full	mean	NP	Landcover	Frequentist
Sample_percent	Subsample_accuracy	Pearson correlation	0.913994	0.95			2.25273	1	0.265963	Pearson correlation	3	normal	ALL	Tessells	R0-24	Full	median	NP	Landcover	Frequentist
Sample_percent	Subsample_accuracy	Pearson correlation	0.999091	0.95			23.4423	1	0.0271404	Pearson correlation	3	normal	ALL	Tessells	R0-24	Dawn	mean	ACIft	Landcover	Frequentist
Sample_percent	Subsample_accuracy	Pearson correlation	0.984904	0.95			5.68973	1	0.110758	Pearson correlation	3	normal	ALL	Tessells	R0-24	Dawn	mean	NP	Landcover	Frequentist
Sample_percent	Subsample_accuracy	Pearson correlation	0.106524	0.95			0.107134	1	0.932056	Pearson correlation	3	normal	ALL	Tessells	R0-24	Dawn	median	ACItf	Landcover	Frequentist
Sample_percent	Subsample_accuracy	Pearson correlation	0.946723	0.95			2.93969	1	0.208743	Pearson correlation	3	normal	ALL	Tessells	R0-24	Dawn	median	ACIft	Landcover	Frequentist
Sample_percent	Subsample_accuracy	Pearson correlation	0.971467	0.95			4.09601	1	0.152442	Pearson correlation	3	normal	ALL	Tessells	R0-24	Dawn	median	NP	Landcover	Frequentist
Sample_percent	Subsample_accuracy	Pearson correlation	0.892688	0.95			1.98078	1	0.297634	Pearson correlation	3	normal	ALL	Tessells	R2-12	Full	mean	ACItf	Landcover	Frequentist
Sample_percent	Subsample_accuracy	Pearson correlation	0.727368	0.95			1.05992	1	0.481486	Pearson correlation	3	normal	ALL	Tessells	R2-12	Full	mean	ACIft	Landcover	Frequentist
Sample_percent	Subsample_accuracy	Pearson correlation	0.997949	0.95			15.5879	1	0.0407848	Pearson correlation	3	normal	ALL	Tessells	R2-12	Full	mean	NP	Landcover	Frequentist
Sample_percent	Subsample_accuracy	Pearson correlation	0.836332	0.95			1.52553	1	0.369391	Pearson correlation	3	normal	ALL	Tessells	R2-12	Full	median	ACItf	Landcover	Frequentist
Sample_percent	Subsample_accuracy	Pearson correlation	0.879166	0.95			1.84499	1	0.3162	Pearson correlation	3	normal	ALL	Tessells	R2-12	Full	median	ACIft	Landcover	Frequentist
Sample_percent	Subsample_accuracy	Pearson correlation	0.367422	0.95			0.395054	1	0.760481	Pearson correlation	3	normal	ALL	Tessells	R2-12	Full	median	NP	Landcover	Frequentist
Sample_percent	Subsample_accuracy	Pearson correlation	0.524149	0.95			0.615468	1	0.648767	Pearson correlation	3	normal	ALL	Tessells	R0-24	Evening	mean	ACItf	Landcover	Frequentist
Sample_percent	Subsample_accuracy	Pearson correlation	0.999632	0.95			36.8476	1	0.0172729	Pearson correlation	3	normal	ALL	Tessells	R0-24	Evening	mean	ACIft	Landcover	Frequentist
Sample_percent	Subsample_accuracy	Pearson correlation	0.807399	0.95			1.36846	1	0.401749	Pearson correlation	3	normal	ALL	Tessells	R0-24	Evening	mean	NP	Landcover	Frequentist
Sample_percent	Subsample_accuracy	Pearson correlation	0.332732	0.95			0.352836	1	0.784059	Pearson correlation	3	normal	ALL	Tessells	R0-24	Evening	median	ACItf	Landcover	Frequentist
Sample_percent	Subsample_accuracy	Pearson correlation	0.739787	0.95			1.0995	1	0.469853	Pearson correlation	3	normal	ALL	Tessells	R0-24	Evening	median	NP	Landcover	Frequentist
Sample_percent	Subsample_accuracy	Pearson correlation	0.611699	0.95			0.773236	1	0.580972	Pearson correlation	3	normal	ALL	Tessells	R2-12	Dawn	mean	ACItf	Landcover	Frequentist
Sample_percent	Subsample_accuracy	Pearson correlation	0.996735	0.95			12.3443	1	0.0514596	Pearson correlation	3	normal	ALL	Tessells	R2-12	Dawn	mean	ACIft	Landcover	Frequentist
Sample_percent	Subsample_accuracy	Pearson correlation	0.960386	0.95			3.44627	1	0.17979	Pearson correlation	3	normal	ALL	Tessells	R2-12	Dawn	mean	NP	Landcover	Frequentist
Sample_percent	Subsample_accuracy	Pearson correlation	0.996474	0.95			11.8767	1	0.0534761	Pearson correlation	3	normal	ALL	Tessells	R2-12	Dawn	median	ACIft	Landcover	Frequentist
Sample_percent	Subsample_accuracy	Pearson correlation	0.973246	0.95			4.2358	1	0.147593	Pearson correlation	3	normal	ALL	Tessells	R2-12	Dawn	median	NP	Landcover	Frequentist
Sample_percent	Subsample_accuracy	Pearson correlation	0.875205	0.95			1.8092	1	0.321453	Pearson correlation	3	normal	ALL	Tessells	R0-2	Full	mean	ACItf	Landcover	Frequentist
Sample_percent	Subsample_accuracy	Pearson correlation	0.823984	0.95			1.45423	1	0.383493	Pearson correlation	3	normal	ALL	Tessells	R0-2	Full	mean	ACIft	Landcover	Frequentist
Sample_percent	Subsample_accuracy	Pearson correlation	0.851472	0.95			1.62371	1	0.35142	Pearson correlation	3	normal	ALL	Tessells	R0-2	Full	mean	BI	Landcover	Frequentist
Sample_percent	Subsample_accuracy	Pearson correlation	0.823726	0.95			1.45281	1	0.383783	Pearson correlation	3	normal	ALL	Tessells	R0-2	Full	mean	NP	Landcover	Frequentist
Sample_percent	Subsample_accuracy	Pearson correlation	0.937208	0.95			2.68718	1	0.226801	Pearson correlation	3	normal	ALL	Tessells	R0-2	Full	mean	NDSI	Landcover	Frequentist
Sample_percent	Subsample_accuracy	Pearson correlation	0.875138	0.95			1.80861	1	0.32154	Pearson correlation	3	normal	ALL	Tessells	R0-2	Full	median	ACItf	Landcover	Frequentist
Sample_percent	Subsample_accuracy	Pearson correlation	0.929916	0.95			2.5285	1	0.239759	Pearson correlation	3	normal	ALL	Tessells	R0-2	Full	median	ACIft	Landcover	Frequentist
Sample_percent	Subsample_accuracy	Pearson correlation	0.976089	0.95			4.49042	1	0.139497	Pearson correlation	3	normal	ALL	Tessells	R0-2	Full	median	BI	Landcover	Frequentist
Sample_percent	Subsample_accuracy	Pearson correlation	0.997277	0.95			13.5236	1	0.0469893	Pearson correlation	3	normal	ALL	Tessells	R0-2	Full	median	NDSI	Landcover	Frequentist
Sample_percent	Subsample_accuracy	Pearson correlation	0.982957	0.95			5.347	1	0.117701	Pearson correlation	3	normal	ALL	Tessells	R2-12	Evening	mean	ACItf	Landcover	Frequentist
Sample_percent	Subsample_accuracy	Pearson correlation	0.986964	0.95			6.1325	1	0.102905	Pearson correlation	3	normal	ALL	Tessells	R2-12	Evening	mean	NP	Landcover	Frequentist
Sample_percent	Subsample_accuracy	Pearson correlation	0.563528	0.95			0.682157	1	0.618887	Pearson correlation	3	normal	ALL	Tessells	R2-12	Evening	median	ACItf	Landcover	Frequentist
Sample_percent	Subsample_accuracy	Pearson correlation	0.531195	0.95			0.626964	1	0.643486	Pearson correlation	3	normal	ALL	Tessells	R2-12	Evening	median	ACIft	Landcover	Frequentist
Sample_percent	Subsample_accuracy	Pearson correlation	0.999999	0.95			862.804	1	0.000737849	Pearson correlation	3	normal	ALL	Tessells	R2-12	Evening	median	NP	Landcover	Frequentist
Sample_percent	Subsample_accuracy	Pearson correlation	0.869515	0.95			1.76049	1	0.328863	Pearson correlation	3	normal	ALL	Tessells	R0-2	Dawn	mean	ACItf	Landcover	Frequentist
Sample_percent	Subsample_accuracy	Pearson correlation	0.998831	0.95			20.6626	1	0.0307862	Pearson correlation	3	normal	ALL	Tessells	R0-2	Dawn	mean	ACIft	Landcover	Frequentist
Sample_percent	Subsample_accuracy	Pearson correlation	0.999316	0.95			27.0301	1	0.0235416	Pearson correlation	3	normal	ALL	Tessells	R0-2	Dawn	mean	BI	Landcover	Frequentist
Sample_percent	Subsample_accuracy	Pearson correlation	0.857416	0.95			1.6661	1	0.344137	Pearson correlation	3	normal	ALL	Tessells	R0-2	Dawn	mean	NP	Landcover	Frequentist
Sample_percent	Subsample_accuracy	Pearson correlation	0.956072	0.95			3.26159	1	0.189394	Pearson correlation	3	normal	ALL	Tessells	R0-2	Dawn	mean	NDSI	Landcover	Frequentist
Sample_percent	Subsample_accuracy	Pearson correlation	0.955272	0.95			3.23023	1	0.191125	Pearson correlation	3	normal	ALL	Tessells	R0-2	Dawn	median	ACItf	Landcover	Frequentist
Sample_percent	Subsample_accuracy	Pearson correlation	0.862477	0.95			1.70418	1	0.337824	Pearson correlation	3	normal	ALL	Tessells	R0-2	Dawn	median	ACIft	Landcover	Frequentist
Sample_percent	Subsample_accuracy	Pearson correlation	0.99507	0.95			10.0337	1	0.0632393	Pearson correlation	3	normal	ALL	Tessells	R0-2	Dawn	median	BI	Landcover	Frequentist
Sample_percent	Subsample_accuracy	Pearson correlation	0.891321	0.95			1.96598	1	0.299559	Pearson correlation	3	normal	ALL	Tessells	R0-2	Dawn	median	NDSI	Landcover	Frequentist

## Sheet: METADATA
Variable	Description
parameter1	Name of the independent variable used in the correlation test (always Sample_percent).
parameter2	Name of the dependent variable used in the correlation test (always Subsample_accuracy).
effectsize	Type of effect size calculated (always Pearson correlation).
estimate	Estimated value of the Pearson correlation coefficient (Pcoef2).
conf.level	Confidence level used for the correlation estimate (typically 0.95).
conf.low	Lower bound of the confidence interval for the correlation estimate (may be NA if n < 4).
conf.high	Upper bound of the confidence interval for the correlation estimate.
statistic	t-value associated with the Pearson correlation test.
df.error	Degrees of freedom used in the test.
p.value	p-value associated with the Pearson correlation test.
method	Method used for computing the correlation (Pearson).
n.obs	Number of observations used in the correlation analysis.
conf.method	Method used to compute confidence intervals (normal, boot, etc.).
Locality	Study site or regional grouping where the data was aggregated.
Type	Subsampling strategy type (e.g., Tessells, Random).
Frequency_Range	Acoustic frequency range used for the index (e.g., R12-24).
Time_Period	Time period associated with the acoustic data aggregation (Sensu Rendon et al. 2025).
Statistic	Summary statistic applied to the data before correlation (mean or median).
Index	Acoustic index analyzed (e.g., ACItf, ACIft, NP, H, etc.).
Subsample	Specific name of the subsampling method used (e.g., SLIC, ssample1).
Statistical_paradigm	Statistical paradigm used: Frequentist or Bayesian. (duplicated name; consider renaming).
