# Supplementary material for: A workflow to optimize spatial sampling in ecoacoustic studies
Source: Research Square preprint supplement (doi:10.21203/rs.3.rs-7207339/v1), 2025-10-10
Supplement: Supplementary file 19 [file DF3_Subsampling_Heterogeneity_Comparison.xlsx]

## Sheet: DATA
Locality	Tessell	field_number_PR	L_proxy_mean	distance_to_pole	Procedence
AndeanRural	basins	A03	44.1863	101.262	Examinated
AndeanRural	basins	A04	49.2196	153.671	Examinated
AndeanRural	basins	A05	48.582	58.5383	Examinated
AndeanRural	basins	B01	44.7284	120.199	Examinated
AndeanRural	basins	B02	45.6716	299.423	Examinated
AndeanRural	basins	B03	43.7833	128.052	Examinated
AndeanRural	basins	B04	47.5741	222.317	Examinated
AndeanRural	basins	B05	50.5928	180.113	Examinated
AndeanRural	basins	B06	43.9496	116.376	Examinated
AndeanRural	basins	C01	44.8592	147.963	Examinated
AndeanRural	basins	C02	51.1763	204.283	Examinated
AndeanRural	basins	C03	48.9285	65.9078	Examinated
AndeanRural	basins	C05	49.8129	191.96	Examinated
AndeanRural	basins	C06	46.0984	10.3817	Examinated
AndeanRural	basins	C07	47.7762	168.628	Examinated
AndeanRural	basins	D01	45.5912	71.4625	Examinated
AndeanRural	basins	D04	51.1994	194.541	Examinated
AndeanRural	basins	D06	51.8622	83.1393	Examinated
AndeanRural	basins	D07	50.2036	219.931	Examinated
AndeanRural	basins	E03	46.9772	226.562	Examinated
AndeanRural	basins	E06	51.8937	212.26	Examinated
AndeanRural	basins	E07	50.54	228.878	Examinated
AndeanRural	basins	F03	49.4449	242.146	Examinated
AndeanRural	basins	F04	49.4288	73.8028	Examinated
AndeanRural	basins	F05	48.9027	136.522	Examinated
AndeanRural	basins	F07	51.9077	281.809	Examinated
AndeanRural	basins	F08	48.7924	72.4965	Examinated
AndeanRural	basins	G04	50.0206	140.319	Examinated
AndeanRural	basins	G08	51.4483	166.212	Examinated
AndeanRural	complete	A03	44.1863	0	Examinated
AndeanRural	complete	A04	49.2196	0	Examinated
AndeanRural	complete	A05	48.582	0	Examinated
AndeanRural	complete	B01	44.7284	0	Examinated
AndeanRural	complete	B02	45.6716	0	Examinated
AndeanRural	complete	B03	43.7833	0	Examinated
AndeanRural	complete	B04	47.5741	0	Examinated
AndeanRural	complete	B05	50.5928	0	Examinated
AndeanRural	complete	B06	43.9496	0	Examinated
AndeanRural	complete	C01	44.8592	0	Examinated
AndeanRural	complete	C02	51.1763	0	Examinated
AndeanRural	complete	C03	48.9285	0	Examinated
AndeanRural	complete	C04	50.615	0	Examinated
AndeanRural	complete	C05	49.8129	0	Examinated
AndeanRural	complete	C06	46.0984	0	Examinated
AndeanRural	complete	C07	47.7762	0	Examinated
AndeanRural	complete	D01	45.5912	0	Examinated
AndeanRural	complete	D02	50.8118	0	Examinated
AndeanRural	complete	D03	48.3945	0	Examinated
AndeanRural	complete	D04	51.1994	0	Examinated
AndeanRural	complete	D05	51.7713	0	Examinated
AndeanRural	complete	D06	51.8622	0	Examinated
AndeanRural	complete	D07	50.2036	0	Examinated
AndeanRural	complete	E03	46.9772	0	Examinated
AndeanRural	complete	E04	50.0022	0	Examinated
AndeanRural	complete	E05	48.8583	0	Examinated
AndeanRural	complete	E06	51.8937	0	Examinated
AndeanRural	complete	E07	50.54	0	Examinated
AndeanRural	complete	F02	43.5395	0	Examinated
AndeanRural	complete	F03	49.4449	0	Examinated
AndeanRural	complete	F04	49.4288	0	Examinated
AndeanRural	complete	F05	48.9027	0	Examinated
AndeanRural	complete	F06	50.1469	0	Examinated
AndeanRural	complete	F07	51.9077	0	Examinated
AndeanRural	complete	F08	48.7924	0	Examinated
AndeanRural	complete	G02	43.3477	0	Examinated
AndeanRural	complete	G03	49.9668	0	Examinated
AndeanRural	complete	G04	50.0206	0	Examinated
AndeanRural	complete	G05	52.858	0	Examinated
AndeanRural	complete	G06	52.8834	0	Examinated
AndeanRural	complete	G08	51.4483	0	Examinated
AndeanRural	halfbasins	A03	44.1863	101.262	Examinated
AndeanRural	halfbasins	A04	49.2196	144.978	Examinated
AndeanRural	halfbasins	A05	48.582	76.9878	Examinated
AndeanRural	halfbasins	B01	44.7284	126.756	Examinated
AndeanRural	halfbasins	B02	45.6716	296.458	Examinated
AndeanRural	halfbasins	B03	43.7833	44.4982	Examinated
AndeanRural	halfbasins	B04	47.5741	129.971	Examinated
AndeanRural	halfbasins	B05	50.5928	12.8248	Examinated
AndeanRural	halfbasins	B06	43.9496	119.118	Examinated
AndeanRural	halfbasins	C01	44.8592	83.6007	Examinated
AndeanRural	halfbasins	C02	51.1763	204.283	Examinated
AndeanRural	halfbasins	C03	48.9285	91.7712	Examinated
AndeanRural	halfbasins	C05	49.8129	116.947	Examinated
AndeanRural	halfbasins	C06	46.0984	17.1772	Examinated
AndeanRural	halfbasins	C07	47.7762	156.209	Examinated
AndeanRural	halfbasins	D01	45.5912	35.5416	Examinated
AndeanRural	halfbasins	D03	48.3945	122.134	Examinated
AndeanRural	halfbasins	D04	51.1994	151.698	Examinated
AndeanRural	halfbasins	D05	51.7713	112.372	Examinated
AndeanRural	halfbasins	D06	51.8622	83.1393	Examinated
AndeanRural	halfbasins	D07	50.2036	168.659	Examinated
AndeanRural	halfbasins	E03	46.9772	226.562	Examinated
AndeanRural	halfbasins	E06	51.8937	162.614	Examinated
AndeanRural	halfbasins	E07	50.54	158.897	Examinated
AndeanRural	halfbasins	F03	49.4449	188.255	Examinated
AndeanRural	halfbasins	F04	49.4288	136.577	Examinated
AndeanRural	halfbasins	F05	48.9027	100.473	Examinated
AndeanRural	halfbasins	F07	51.9077	239.533	Examinated
AndeanRural	halfbasins	F08	48.7924	143.413	Examinated
AndeanRural	halfbasins	G02	43.3477	148.282	Examinated
AndeanRural	halfbasins	G04	50.0206	140.319	Examinated
AndeanRural	halfbasins	G08	51.4483	82.6338	Examinated
AndeanRural	Landcover	A03	44.1863	43.2937	Examinated
AndeanRural	Landcover	A05	48.582	11.8609	Examinated
AndeanRural	Landcover	B01	44.7284	57.3064	Examinated
AndeanRural	Landcover	B02	45.6716	29.2514	Examinated
AndeanRural	Landcover	B04	47.5741	20.4502	Examinated
AndeanRural	Landcover	B06	43.9496	39.4174	Examinated
AndeanRural	Landcover	C02	51.1763	35.1958	Examinated
AndeanRural	Landcover	C03	48.9285	37.6508	Examinated
AndeanRural	Landcover	C04	50.615	41.7849	Examinated
AndeanRural	Landcover	C05	49.8129	31.9803	Examinated
AndeanRural	Landcover	C07	47.7762	48.6935	Examinated
AndeanRural	Landcover	D03	48.3945	15.9223	Examinated
AndeanRural	Landcover	D05	51.7713	5.14014	Examinated
AndeanRural	Landcover	E05	48.8583	35.4591	Examinated
AndeanRural	Landcover	F02	43.5395	50.1968	Examinated
AndeanRural	Landcover	F03	49.4449	9.20269	Examinated
AndeanRural	Landcover	F07	51.9077	13.0797	Examinated
AndeanRural	Landcover	F08	48.7924	38.408	Examinated
AndeanRural	Landcover	G02	43.3477	25.9412	Examinated
AndeanRural	Landcover	G03	49.9668	27.7619	Examinated
AndeanRural	Landcover	G04	50.0206	50.2604	Examinated
AndeanRural	Landcover	G06	52.8834	51.2421	Examinated
AndeanRural	Landcover	G08	51.4483	22.8423	Examinated
AndeanRural	SLIC	A03	44.1863	240.788	Examinated
AndeanRural	SLIC	A04	49.2196	112.942	Examinated
AndeanRural	SLIC	A05	48.582	173.69	Examinated
AndeanRural	SLIC	B01	44.7284	264.345	Examinated
AndeanRural	SLIC	B02	45.6716	21.9214	Examinated
AndeanRural	SLIC	B04	47.5741	158.664	Examinated
AndeanRural	SLIC	C01	44.8592	89.8083	Examinated
AndeanRural	SLIC	C02	51.1763	153.479	Examinated
AndeanRural	SLIC	C05	49.8129	320.336	Examinated
AndeanRural	SLIC	C07	47.7762	152.113	Examinated
AndeanRural	SLIC	D01	45.5912	102.789	Examinated
AndeanRural	SLIC	D02	50.8118	244.761	Examinated
AndeanRural	SLIC	D03	48.3945	161.263	Examinated
AndeanRural	SLIC	D04	51.1994	118.795	Examinated
AndeanRural	SLIC	D05	51.7713	203.558	Examinated
AndeanRural	SLIC	D07	50.2036	238.55	Examinated
AndeanRural	SLIC	E03	46.9772	112.048	Examinated
AndeanRural	SLIC	E04	50.0022	168.904	Examinated
AndeanRural	SLIC	E05	48.8583	125.205	Examinated
AndeanRural	SLIC	E06	51.8937	127.208	Examinated
AndeanRural	SLIC	E07	50.54	156.419	Examinated
AndeanRural	SLIC	F02	43.5395	201.651	Examinated
AndeanRural	SLIC	F03	49.4449	221.392	Examinated
AndeanRural	SLIC	F05	48.9027	146.763	Examinated
AndeanRural	SLIC	F06	50.1469	156.352	Examinated
AndeanRural	SLIC	F07	51.9077	256.794	Examinated
AndeanRural	SLIC	G02	43.3477	226.983	Examinated
AndeanRural	SLIC	G03	49.9668	288.32	Examinated
AndeanRural	SLIC	G05	52.858	241.146	Examinated
AndeanRural	SLIC	G06	52.8834	148.477	Examinated
AndeanRural	SLIC	G08	51.4483	148.02	Examinated
AndeanUrban	basins	LEA01	59.1519	185.536	Examinated
AndeanUrban	basins	LEA02	56.915	83.2201	Examinated
AndeanUrban	basins	LEA03	58.2111	95.4163	Examinated
AndeanUrban	basins	LEA04	54.1433	108.268	Examinated
AndeanUrban	basins	LEA05	56.8017	110.006	Examinated
AndeanUrban	basins	LEB01	59.8205	102.577	Examinated
AndeanUrban	basins	LEB02	58.6326	247.582	Examinated
AndeanUrban	basins	LEB03	58.302	361.497	Examinated
AndeanUrban	basins	LEB04	59.0309	325.539	Examinated
AndeanUrban	basins	LEC01	59.7567	269.202	Examinated
AndeanUrban	basins	LEC03	58.8865	115.531	Examinated
AndeanUrban	basins	LEC06	56.2884	231.154	Examinated
AndeanUrban	basins	LEC07	57.2438	332.956	Examinated
AndeanUrban	basins	LED01	59.5904	242.593	Examinated
AndeanUrban	basins	LED02	57.6039	86.6476	Examinated
AndeanUrban	basins	LED03	49.7814	243.057	Examinated
AndeanUrban	basins	LED05	53.3131	26.7643	Examinated
AndeanUrban	basins	LEE03	45.9487	251.112	Examinated
AndeanUrban	basins	LEE05	53.3738	222.148	Examinated
AndeanUrban	basins	LEF01	49.1306	202.859	Examinated
AndeanUrban	basins	LEF02	43.4841	179.438	Examinated
AndeanUrban	basins	LEF07	53.4809	172.375	Examinated
AndeanUrban	basins	LEG01	37.5006	288.897	Examinated
AndeanUrban	basins	LEG02	26.6528	69.2869	Examinated
AndeanUrban	basins	LEH01	44.2482	301.886	Examinated
AndeanUrban	basins	LEH03	47.1432	214.742	Examinated
AndeanUrban	basins	LEH05	49.614	263.785	Examinated
AndeanUrban	basins	LEH06	47.0784	165.636	Examinated
AndeanUrban	basins	LEH07	54.3194	281.202	Examinated
AndeanUrban	basins	LEH09	46.0523	281.513	Examinated
AndeanUrban	basins	LEH10	47.5746	163.111	Examinated
AndeanUrban	basins	LEI01	41.8438	336.881	Examinated
AndeanUrban	basins	LEI03	50.8099	191.979	Examinated
AndeanUrban	basins	LEI04	52.8756	215.134	Examinated
AndeanUrban	basins	LEI05	50.3206	130.368	Examinated
AndeanUrban	basins	LEJ01	23.4749	196.766	Examinated
AndeanUrban	basins	LEJ02	39.6661	268.033	Examinated
AndeanUrban	basins	LEJ03	41.7698	184.523	Examinated
AndeanUrban	basins	LEJ04	32.1219	89.5622	Examinated
AndeanUrban	basins	LEJ05	36.1145	165.808	Examinated
AndeanUrban	basins	LEK01	32.6263	208.896	Examinated
AndeanUrban	basins	LEK02	35.4426	141.755	Examinated
AndeanUrban	basins	LEK05	44.6263	66.0405	Examinated
AndeanUrban	basins	LEK06	48.4645	234.679	Examinated
AndeanUrban	basins	LEM01	54.1186	161.912	Examinated
AndeanUrban	basins	LEM03	45.0953	230.319	Examinated
AndeanUrban	basins	LEM04	56.0497	78.1283	Examinated
AndeanUrban	basins	LEN02	52.0531	83.6108	Examinated
AndeanUrban	basins	LEO01	50.0758	158.458	Examinated
AndeanUrban	basins	LEO02	50.2733	95.1036	Examinated
AndeanUrban	complete	LEA01	59.1519	0	Examinated
AndeanUrban	complete	LEA02	56.915	0	Examinated
AndeanUrban	complete	LEA03	58.2111	0	Examinated
AndeanUrban	complete	LEA04	54.1433	0	Examinated
AndeanUrban	complete	LEA05	56.8017	0	Examinated
AndeanUrban	complete	LEB01	59.8205	0	Examinated
AndeanUrban	complete	LEB02	58.6326	0	Examinated
AndeanUrban	complete	LEB03	58.302	0	Examinated
AndeanUrban	complete	LEB04	59.0309	0	Examinated
AndeanUrban	complete	LEC01	59.7567	0	Examinated
AndeanUrban	complete	LEC03	58.8865	0	Examinated
AndeanUrban	complete	LEC05	54.6776	0	Examinated
AndeanUrban	complete	LEC06	56.2884	0	Examinated
AndeanUrban	complete	LEC07	57.2438	0	Examinated
AndeanUrban	complete	LED01	59.5904	0	Examinated
AndeanUrban	complete	LED02	57.6039	0	Examinated
AndeanUrban	complete	LED03	49.7814	0	Examinated
AndeanUrban	complete	LED05	53.3131	0	Examinated
AndeanUrban	complete	LEE03	45.9487	0	Examinated
AndeanUrban	complete	LEE04	55.8717	0	Examinated
AndeanUrban	complete	LEE05	53.3738	0	Examinated
AndeanUrban	complete	LEE06	57.699	0	Examinated
AndeanUrban	complete	LEF01	49.1306	0	Examinated
AndeanUrban	complete	LEF02	43.4841	0	Examinated
AndeanUrban	complete	LEF07	53.4809	0	Examinated
AndeanUrban	complete	LEG01	37.5006	0	Examinated
AndeanUrban	complete	LEG02	26.6528	0	Examinated
AndeanUrban	complete	LEH01	44.2482	0	Examinated
AndeanUrban	complete	LEH03	47.1432	0	Examinated
AndeanUrban	complete	LEH05	49.614	0	Examinated
AndeanUrban	complete	LEH06	47.0784	0	Examinated
AndeanUrban	complete	LEH07	54.3194	0	Examinated
AndeanUrban	complete	LEH09	46.0523	0	Examinated
AndeanUrban	complete	LEH10	47.5746	0	Examinated
AndeanUrban	complete	LEI01	41.8438	0	Examinated
AndeanUrban	complete	LEI03	50.8099	0	Examinated
AndeanUrban	complete	LEI04	52.8756	0	Examinated
AndeanUrban	complete	LEI05	50.3206	0	Examinated
AndeanUrban	complete	LEJ01	23.4749	0	Examinated
AndeanUrban	complete	LEJ02	39.6661	0	Examinated
AndeanUrban	complete	LEJ03	41.7698	0	Examinated
AndeanUrban	complete	LEJ04	32.1219	0	Examinated
AndeanUrban	complete	LEJ05	36.1145	0	Examinated
AndeanUrban	complete	LEK01	32.6263	0	Examinated
AndeanUrban	complete	LEK02	35.4426	0	Examinated
AndeanUrban	complete	LEK05	44.6263	0	Examinated
AndeanUrban	complete	LEK06	48.4645	0	Examinated
AndeanUrban	complete	LEL03	45.9482	0	Examinated
AndeanUrban	complete	LEM01	54.1186	0	Examinated
AndeanUrban	complete	LEM03	45.0953	0	Examinated
AndeanUrban	complete	LEM04	56.0497	0	Examinated
AndeanUrban	complete	LEN02	52.0531	0	Examinated
AndeanUrban	complete	LEO01	50.0758	0	Examinated
AndeanUrban	complete	LEO02	50.2733	0	Examinated
AndeanUrban	halfbasins	LEA01	59.1519	154.99	Examinated
AndeanUrban	halfbasins	LEA02	56.915	68.6181	Examinated
AndeanUrban	halfbasins	LEA03	58.2111	93.1322	Examinated
AndeanUrban	halfbasins	LEA04	54.1433	98.2902	Examinated
AndeanUrban	halfbasins	LEA05	56.8017	94.129	Examinated
AndeanUrban	halfbasins	LEB01	59.8205	146.28	Examinated
AndeanUrban	halfbasins	LEB02	58.6326	247.582	Examinated
AndeanUrban	halfbasins	LEB03	58.302	133.416	Examinated
AndeanUrban	halfbasins	LEB04	59.0309	311.047	Examinated
AndeanUrban	halfbasins	LEC01	59.7567	106.476	Examinated
AndeanUrban	halfbasins	LEC03	58.8865	100.696	Examinated
AndeanUrban	halfbasins	LEC05	54.6776	18.6149	Examinated
AndeanUrban	halfbasins	LEC06	56.2884	38.9292	Examinated
AndeanUrban	halfbasins	LEC07	57.2438	293.192	Examinated
AndeanUrban	halfbasins	LED01	59.5904	229.542	Examinated
AndeanUrban	halfbasins	LED02	57.6039	322.731	Examinated
AndeanUrban	halfbasins	LED03	49.7814	184.045	Examinated
AndeanUrban	halfbasins	LED05	53.3131	26.7643	Examinated
AndeanUrban	halfbasins	LEE03	45.9487	241.142	Examinated
AndeanUrban	halfbasins	LEE05	53.3738	26.4895	Examinated
AndeanUrban	halfbasins	LEE06	57.699	228.493	Examinated
AndeanUrban	halfbasins	LEF01	49.1306	180.363	Examinated
AndeanUrban	halfbasins	LEF02	43.4841	130.179	Examinated
AndeanUrban	halfbasins	LEF07	53.4809	177.966	Examinated
AndeanUrban	halfbasins	LEG01	37.5006	186.36	Examinated
AndeanUrban	halfbasins	LEG02	26.6528	70.7672	Examinated
AndeanUrban	halfbasins	LEH01	44.2482	213.026	Examinated
AndeanUrban	halfbasins	LEH03	47.1432	148.584	Examinated
AndeanUrban	halfbasins	LEH05	49.614	113.445	Examinated
AndeanUrban	halfbasins	LEH06	47.0784	165.636	Examinated
AndeanUrban	halfbasins	LEH07	54.3194	115.479	Examinated
AndeanUrban	halfbasins	LEH09	46.0523	340.768	Examinated
AndeanUrban	halfbasins	LEH10	47.5746	90.9347	Examinated
AndeanUrban	halfbasins	LEI01	41.8438	197.083	Examinated
AndeanUrban	halfbasins	LEI03	50.8099	187.532	Examinated
AndeanUrban	halfbasins	LEI04	52.8756	236.148	Examinated
AndeanUrban	halfbasins	LEI05	50.3206	105.726	Examinated
AndeanUrban	halfbasins	LEJ01	23.4749	131.824	Examinated
AndeanUrban	halfbasins	LEJ02	39.6661	231.365	Examinated
AndeanUrban	halfbasins	LEJ03	41.7698	57.8321	Examinated
AndeanUrban	halfbasins	LEJ04	32.1219	81.5052	Examinated
AndeanUrban	halfbasins	LEJ05	36.1145	195.787	Examinated
AndeanUrban	halfbasins	LEK01	32.6263	217.623	Examinated
AndeanUrban	halfbasins	LEK02	35.4426	177.982	Examinated
AndeanUrban	halfbasins	LEK05	44.6263	27.1474	Examinated
AndeanUrban	halfbasins	LEK06	48.4645	41.3413	Examinated
AndeanUrban	halfbasins	LEL03	45.9482	42.3437	Examinated
AndeanUrban	halfbasins	LEM01	54.1186	140.711	Examinated
AndeanUrban	halfbasins	LEM03	45.0953	120.606	Examinated
AndeanUrban	halfbasins	LEM04	56.0497	112.913	Examinated
AndeanUrban	halfbasins	LEN02	52.0531	58.0289	Examinated
AndeanUrban	halfbasins	LEO01	50.0758	362.577	Examinated
AndeanUrban	halfbasins	LEO02	50.2733	34.2052	Examinated
AndeanUrban	Landcover	LEA03	58.2111	176.779	Examinated
AndeanUrban	Landcover	LEC05	54.6776	5.93416	Examinated
AndeanUrban	Landcover	LED03	49.7814	19.0648	Examinated
AndeanUrban	Landcover	LEE03	45.9487	26.5968	Examinated
AndeanUrban	Landcover	LEE04	55.8717	16.2461	Examinated
AndeanUrban	Landcover	LEF01	49.1306	10.71	Examinated
AndeanUrban	Landcover	LEG02	26.6528	15.7249	Examinated
AndeanUrban	Landcover	LEH01	44.2482	30.1369	Examinated
AndeanUrban	Landcover	LEH05	49.614	10.8741	Examinated
AndeanUrban	Landcover	LEH09	46.0523	4.15896	Examinated
AndeanUrban	Landcover	LEH10	47.5746	19.8062	Examinated
AndeanUrban	Landcover	LEI03	50.8099	16.9497	Examinated
AndeanUrban	Landcover	LEI04	52.8756	37.0592	Examinated
AndeanUrban	Landcover	LEI05	50.3206	20.1218	Examinated
AndeanUrban	Landcover	LEJ03	41.7698	18.0309	Examinated
AndeanUrban	Landcover	LEJ05	36.1145	4.54469	Examinated
AndeanUrban	Landcover	LEK01	32.6263	46.8499	Examinated
AndeanUrban	Landcover	LEK06	48.4645	33.1481	Examinated
AndeanUrban	Landcover	LEL03	45.9482	18.9893	Examinated
AndeanUrban	Landcover	LEM01	54.1186	44.0005	Examinated
AndeanUrban	Landcover	LEM03	45.0953	15.9828	Examinated
AndeanUrban	Landcover	LEN02	52.0531	13.8609	Examinated
AndeanUrban	Landcover	LEO02	50.2733	27.1293	Examinated
AndeanUrban	SLIC	LEA01	59.1519	328.942	Examinated
AndeanUrban	SLIC	LEA02	56.915	82.2954	Examinated
AndeanUrban	SLIC	LEA03	58.2111	192.798	Examinated
AndeanUrban	SLIC	LEA04	54.1433	50.281	Examinated
AndeanUrban	SLIC	LEA05	56.8017	363.287	Examinated
AndeanUrban	SLIC	LEB01	59.8205	79.0005	Examinated
AndeanUrban	SLIC	LEB02	58.6326	287.148	Examinated
AndeanUrban	SLIC	LEB03	58.302	111.099	Examinated
AndeanUrban	SLIC	LEB04	59.0309	270.862	Examinated
AndeanUrban	SLIC	LEC01	59.7567	192.08	Examinated
AndeanUrban	SLIC	LEC03	58.8865	193.392	Examinated
AndeanUrban	SLIC	LEC05	54.6776	106.907	Examinated
AndeanUrban	SLIC	LEC06	56.2884	174.888	Examinated
AndeanUrban	SLIC	LEC07	57.2438	337.136	Examinated
AndeanUrban	SLIC	LED01	59.5904	94.7281	Examinated
AndeanUrban	SLIC	LED02	57.6039	128.884	Examinated
AndeanUrban	SLIC	LED03	49.7814	135.947	Examinated
AndeanUrban	SLIC	LED05	53.3131	291.173	Examinated
AndeanUrban	SLIC	LEE03	45.9487	98.6763	Examinated
AndeanUrban	SLIC	LEE04	55.8717	204.336	Examinated
AndeanUrban	SLIC	LEE05	53.3738	298.008	Examinated
AndeanUrban	SLIC	LEE06	57.699	92.2587	Examinated
AndeanUrban	SLIC	LEF01	49.1306	350.644	Examinated
AndeanUrban	SLIC	LEF02	43.4841	155.339	Examinated
AndeanUrban	SLIC	LEF07	53.4809	218.273	Examinated
AndeanUrban	SLIC	LEG01	37.5006	121.291	Examinated
AndeanUrban	SLIC	LEG02	26.6528	374.663	Examinated
AndeanUrban	SLIC	LEH03	47.1432	220.513	Examinated
AndeanUrban	SLIC	LEH05	49.614	348.315	Examinated
AndeanUrban	SLIC	LEH06	47.0784	297.638	Examinated
AndeanUrban	SLIC	LEH07	54.3194	122.578	Examinated
AndeanUrban	SLIC	LEH10	47.5746	208.273	Examinated
AndeanUrban	SLIC	LEI01	41.8438	216.42	Examinated
AndeanUrban	SLIC	LEI03	50.8099	200.788	Examinated
AndeanUrban	SLIC	LEI04	52.8756	69.8965	Examinated
AndeanUrban	SLIC	LEI05	50.3206	131.235	Examinated
AndeanUrban	SLIC	LEJ01	23.4749	424.263	Examinated
AndeanUrban	SLIC	LEJ02	39.6661	232.431	Examinated
AndeanUrban	SLIC	LEJ03	41.7698	253.196	Examinated
AndeanUrban	SLIC	LEJ04	32.1219	206.101	Examinated
AndeanUrban	SLIC	LEJ05	36.1145	111.27	Examinated
AndeanUrban	SLIC	LEK02	35.4426	151.585	Examinated
AndeanUrban	SLIC	LEK05	44.6263	226.388	Examinated
AndeanUrban	SLIC	LEK06	48.4645	261.48	Examinated
AndeanUrban	SLIC	LEM01	54.1186	280.032	Examinated
AndeanUrban	SLIC	LEM03	45.0953	345.282	Examinated
AndeanUrban	SLIC	LEM04	56.0497	153.726	Examinated
AndeanUrban	SLIC	LEN02	52.0531	172.868	Examinated
AndeanUrban	SLIC	LEO01	50.0758	158.116	Examinated
AndeanUrban	SLIC	LEO02	50.2733	213.385	Examinated
Plains	basins	RZUA04	48.4948	475.216	Examinated
Plains	basins	RZUA05	51.2419	189.062	Examinated
Plains	basins	RZUA06	50.9153	169.314	Examinated
Plains	basins	RZUA07	33.7551	146.981	Examinated
Plains	basins	RZUA09	43.3627	240.168	Examinated
Plains	basins	RZUA10	52.1499	217.29	Examinated
Plains	basins	RZUB01	44.3862	265.419	Examinated
Plains	basins	RZUB03	54.4086	113.001	Examinated
Plains	basins	RZUB05	50.0404	235.711	Examinated
Plains	basins	RZUB06	44.1727	152.33	Examinated
Plains	basins	RZUB08	33.0486	191.24	Examinated
Plains	basins	RZUB09	41.9655	128.429	Examinated
Plains	basins	RZUB10	52.6427	190.451	Examinated
Plains	basins	RZUB11	53.4949	244.764	Examinated
Plains	basins	RZUC01	39.006	98.396	Examinated
Plains	basins	RZUC02	36.5927	165.1	Examinated
Plains	basins	RZUC03	53.4107	237.676	Examinated
Plains	basins	RZUC05	53.7986	184.669	Examinated
Plains	basins	RZUC08	44.3417	173.313	Examinated
Plains	basins	RZUC09	44.0958	157.751	Examinated
Plains	basins	RZUC10	42.8321	48.9448	Examinated
Plains	basins	RZUC12	50.2628	295.285	Examinated
Plains	basins	RZUD02	35.6443	109.118	Examinated
Plains	basins	RZUD04	53.2315	136.147	Examinated
Plains	basins	RZUD05	38.7655	162.219	Examinated
Plains	basins	RZUD07	43.9837	127.736	Examinated
Plains	basins	RZUD08	47.2488	141.741	Examinated
Plains	basins	RZUD10	32.1414	138.541	Examinated
Plains	basins	RZUD12	41.9846	134.076	Examinated
Plains	basins	RZUE02	52.7394	217.325	Examinated
Plains	basins	RZUE05	43.113	214.118	Examinated
Plains	basins	RZUE06	35.4327	65.236	Examinated
Plains	basins	RZUE07	34.3008	145.808	Examinated
Plains	basins	RZUE08	39.2559	220.226	Examinated
Plains	basins	RZUE09	34.7768	205.129	Examinated
Plains	basins	RZUE11	28.6547	102.598	Examinated
Plains	basins	RZUE13	38.3141	176.155	Examinated
Plains	basins	RZUF03	35.8473	190.019	Examinated
Plains	basins	RZUF05	30.5592	181.81	Examinated
Plains	basins	RZUF10	39.1336	163.926	Examinated
Plains	basins	RZUF12	44.2505	166.003	Examinated
Plains	basins	RZUG02	47.7856	340.043	Examinated
Plains	basins	RZUG06	30.5783	72.2787	Examinated
Plains	basins	RZUG08	30.1537	113.975	Examinated
Plains	basins	RZUG09	33.628	101.397	Examinated
Plains	basins	RZUG10	35.1933	117.889	Examinated
Plains	basins	RZUG13	44.4586	121.303	Examinated
Plains	basins	RZUH02	43.886	221.114	Examinated
Plains	basins	RZUH03	34.4809	91.0902	Examinated
Plains	basins	RZUH04	39.7221	171.037	Examinated
Plains	basins	RZUH05	24.3621	163.654	Examinated
Plains	basins	RZUH07	45.2481	403.663	Examinated
Plains	basins	RZUH08	28.0842	274.25	Examinated
Plains	basins	RZUH09	44.1951	178.925	Examinated
Plains	basins	RZUH11	32.29	143.506	Examinated
Plains	basins	RZUH12	36.1371	48.3406	Examinated
Plains	basins	RZUH13	43.4294	226.655	Examinated
Plains	complete	RZUA01	48.8525	0	Examinated
Plains	complete	RZUA02	52.5917	0	Examinated
Plains	complete	RZUA03a	52.9501	0	Examinated
Plains	complete	RZUA03b	51.4804	0	Examinated
Plains	complete	RZUA04	48.4948	0	Examinated
Plains	complete	RZUA05	51.2419	0	Examinated
Plains	complete	RZUA06	50.9153	0	Examinated
Plains	complete	RZUA07	33.7551	0	Examinated
Plains	complete	RZUA08	44.979	0	Examinated
Plains	complete	RZUA09	43.3627	0	Examinated
Plains	complete	RZUA10	52.1499	0	Examinated
Plains	complete	RZUB01	44.3862	0	Examinated
Plains	complete	RZUB02	52.6779	0	Examinated
Plains	complete	RZUB03	54.4086	0	Examinated
Plains	complete	RZUB04	50.2239	0	Examinated
Plains	complete	RZUB05	50.0404	0	Examinated
Plains	complete	RZUB06	44.1727	0	Examinated
Plains	complete	RZUB07	33.1608	0	Examinated
Plains	complete	RZUB08	33.0486	0	Examinated
Plains	complete	RZUB09	41.9655	0	Examinated
Plains	complete	RZUB10	52.6427	0	Examinated
Plains	complete	RZUB11	53.4949	0	Examinated
Plains	complete	RZUC01	39.006	0	Examinated
Plains	complete	RZUC02	36.5927	0	Examinated
Plains	complete	RZUC03	53.4107	0	Examinated
Plains	complete	RZUC05	53.7986	0	Examinated
Plains	complete	RZUC06	42.6852	0	Examinated
Plains	complete	RZUC07	36.3147	0	Examinated
Plains	complete	RZUC08	44.3417	0	Examinated
Plains	complete	RZUC09	44.0958	0	Examinated
Plains	complete	RZUC10	42.8321	0	Examinated
Plains	complete	RZUC11	48.8001	0	Examinated
Plains	complete	RZUC12	50.2628	0	Examinated
Plains	complete	RZUD01	49.5287	0	Examinated
Plains	complete	RZUD01M	49.765	0	Examinated
Plains	complete	RZUD02	35.6443	0	Examinated
Plains	complete	RZUD03	43.1117	0	Examinated
Plains	complete	RZUD04	53.2315	0	Examinated
Plains	complete	RZUD05	38.7655	0	Examinated
Plains	complete	RZUD06	44.4688	0	Examinated
Plains	complete	RZUD07	43.9837	0	Examinated
Plains	complete	RZUD08	47.2488	0	Examinated
Plains	complete	RZUD09	44.5166	0	Examinated
Plains	complete	RZUD10	32.1414	0	Examinated
Plains	complete	RZUD11	42.1349	0	Examinated
Plains	complete	RZUD12	41.9846	0	Examinated
Plains	complete	RZUD13	41.8991	0	Examinated
Plains	complete	RZUE01	53.7159	0	Examinated
Plains	complete	RZUE02	52.7394	0	Examinated
Plains	complete	RZUE03	35.6056	0	Examinated
Plains	complete	RZUE04	53.4442	0	Examinated
Plains	complete	RZUE05	43.113	0	Examinated
Plains	complete	RZUE06	35.4327	0	Examinated
Plains	complete	RZUE07	34.3008	0	Examinated
Plains	complete	RZUE08	39.2559	0	Examinated
Plains	complete	RZUE09	34.7768	0	Examinated
Plains	complete	RZUE10	42.625	0	Examinated
Plains	complete	RZUE11	28.6547	0	Examinated
Plains	complete	RZUE12	54.5759	0	Examinated
Plains	complete	RZUE13	38.3141	0	Examinated
Plains	complete	RZUF02	48.1136	0	Examinated
Plains	complete	RZUF03	35.8473	0	Examinated
Plains	complete	RZUF04	45.7257	0	Examinated
Plains	complete	RZUF05	30.5592	0	Examinated
Plains	complete	RZUF06	30.4794	0	Examinated
Plains	complete	RZUF07	36.3832	0	Examinated
Plains	complete	RZUF08	30.6413	0	Examinated
Plains	complete	RZUF09	38.6474	0	Examinated
Plains	complete	RZUF10	39.1336	0	Examinated
Plains	complete	RZUF11	33.898	0	Examinated
Plains	complete	RZUF12	44.2505	0	Examinated
Plains	complete	RZUF13	55.1793	0	Examinated
Plains	complete	RZUG02	47.7856	0	Examinated
Plains	complete	RZUG03	45.9099	0	Examinated
Plains	complete	RZUG04	30.9282	0	Examinated
Plains	complete	RZUG05	37.7634	0	Examinated
Plains	complete	RZUG06	30.5783	0	Examinated
Plains	complete	RZUG07	36.2708	0	Examinated
Plains	complete	RZUG08	30.1537	0	Examinated
Plains	complete	RZUG09	33.628	0	Examinated
Plains	complete	RZUG10	35.1933	0	Examinated
Plains	complete	RZUG11	35.1528	0	Examinated
Plains	complete	RZUG12	38.548	0	Examinated
Plains	complete	RZUG13	44.4586	0	Examinated
Plains	complete	RZUH02	43.886	0	Examinated
Plains	complete	RZUH03	34.4809	0	Examinated
Plains	complete	RZUH04	39.7221	0	Examinated
Plains	complete	RZUH05	24.3621	0	Examinated
Plains	complete	RZUH06	28.4849	0	Examinated
Plains	complete	RZUH07	45.2481	0	Examinated
Plains	complete	RZUH08	28.0842	0	Examinated
Plains	complete	RZUH09	44.1951	0	Examinated
Plains	complete	RZUH10	32.7794	0	Examinated
Plains	complete	RZUH11	32.29	0	Examinated
Plains	complete	RZUH12	36.1371	0	Examinated
Plains	complete	RZUH13	43.4294	0	Examinated
Plains	halfbasins	RZUA01	48.8525	282.616	Examinated
Plains	halfbasins	RZUA03a	52.9501	11.3551	Examinated
Plains	halfbasins	RZUA03b	51.4804	16.4681	Examinated
Plains	halfbasins	RZUA04	48.4948	412.044	Examinated
Plains	halfbasins	RZUA05	51.2419	214.837	Examinated
Plains	halfbasins	RZUA06	50.9153	152.453	Examinated
Plains	halfbasins	RZUA07	33.7551	131.54	Examinated
Plains	halfbasins	RZUA08	44.979	170.626	Examinated
Plains	halfbasins	RZUA09	43.3627	146.845	Examinated
Plains	halfbasins	RZUA10	52.1499	177.857	Examinated
Plains	halfbasins	RZUB01	44.3862	216.43	Examinated
Plains	halfbasins	RZUB03	54.4086	136.94	Examinated
Plains	halfbasins	RZUB05	50.0404	94.5017	Examinated
Plains	halfbasins	RZUB06	44.1727	189.556	Examinated
Plains	halfbasins	RZUB08	33.0486	52.5359	Examinated
Plains	halfbasins	RZUB09	41.9655	160.952	Examinated
Plains	halfbasins	RZUB10	52.6427	119.872	Examinated
Plains	halfbasins	RZUB11	53.4949	153.174	Examinated
Plains	halfbasins	RZUC01	39.006	128.155	Examinated
Plains	halfbasins	RZUC02	36.5927	88.2884	Examinated
Plains	halfbasins	RZUC03	53.4107	132.583	Examinated
Plains	halfbasins	RZUC05	53.7986	166.286	Examinated
Plains	halfbasins	RZUC07	36.3147	128.043	Examinated
Plains	halfbasins	RZUC08	44.3417	209.036	Examinated
Plains	halfbasins	RZUC09	44.0958	113.465	Examinated
Plains	halfbasins	RZUC10	42.8321	22.607	Examinated
Plains	halfbasins	RZUC12	50.2628	161.139	Examinated
Plains	halfbasins	RZUD01M	49.765	237.117	Examinated
Plains	halfbasins	RZUD02	35.6443	104.299	Examinated
Plains	halfbasins	RZUD03	43.1117	75.5263	Examinated
Plains	halfbasins	RZUD04	53.2315	136.147	Examinated
Plains	halfbasins	RZUD05	38.7655	62.8243	Examinated
Plains	halfbasins	RZUD07	43.9837	134.831	Examinated
Plains	halfbasins	RZUD08	47.2488	144.983	Examinated
Plains	halfbasins	RZUD09	44.5166	133.419	Examinated
Plains	halfbasins	RZUD10	32.1414	157.041	Examinated
Plains	halfbasins	RZUD11	42.1349	200.513	Examinated
Plains	halfbasins	RZUD12	41.9846	119.883	Examinated
Plains	halfbasins	RZUD13	41.8991	227.402	Examinated
Plains	halfbasins	RZUE01	53.7159	250.7	Examinated
Plains	halfbasins	RZUE02	52.7394	206.257	Examinated
Plains	halfbasins	RZUE04	53.4442	130.299	Examinated
Plains	halfbasins	RZUE05	43.113	83.3775	Examinated
Plains	halfbasins	RZUE06	35.4327	83.2159	Examinated
Plains	halfbasins	RZUE07	34.3008	105.272	Examinated
Plains	halfbasins	RZUE08	39.2559	256.669	Examinated
Plains	halfbasins	RZUE09	34.7768	75.8574	Examinated
Plains	halfbasins	RZUE11	28.6547	99.6316	Examinated
Plains	halfbasins	RZUE12	54.5759	132.601	Examinated
Plains	halfbasins	RZUE13	38.3141	71.8238	Examinated
Plains	halfbasins	RZUF02	48.1136	255.79	Examinated
Plains	halfbasins	RZUF05	30.5592	148.69	Examinated
Plains	halfbasins	RZUF08	30.6413	188.486	Examinated
Plains	halfbasins	RZUF10	39.1336	32.3969	Examinated
Plains	halfbasins	RZUF11	33.898	73.9205	Examinated
Plains	halfbasins	RZUG02	47.7856	88.2114	Examinated
Plains	halfbasins	RZUG05	37.7634	112.839	Examinated
Plains	halfbasins	RZUG06	30.5783	161.251	Examinated
Plains	halfbasins	RZUG07	36.2708	123.871	Examinated
Plains	halfbasins	RZUG08	30.1537	60.4104	Examinated
Plains	halfbasins	RZUG09	33.628	197.524	Examinated
Plains	halfbasins	RZUG12	38.548	101.119	Examinated
Plains	halfbasins	RZUG13	44.4586	58.5489	Examinated
Plains	halfbasins	RZUH02	43.886	263.212	Examinated
Plains	halfbasins	RZUH03	34.4809	49.1692	Examinated
Plains	halfbasins	RZUH04	39.7221	141.875	Examinated
Plains	halfbasins	RZUH05	24.3621	126.585	Examinated
Plains	halfbasins	RZUH07	45.2481	295.979	Examinated
Plains	halfbasins	RZUH08	28.0842	116.465	Examinated
Plains	halfbasins	RZUH09	44.1951	178.925	Examinated
Plains	halfbasins	RZUH10	32.7794	91.4401	Examinated
Plains	halfbasins	RZUH11	32.29	151.087	Examinated
Plains	halfbasins	RZUH12	36.1371	26.5152	Examinated
Plains	halfbasins	RZUH13	43.4294	117.361	Examinated
Plains	Landcover	RZUA02	52.5917	101.276	Examinated
Plains	Landcover	RZUA03a	52.9501	33.5488	Examinated
Plains	Landcover	RZUA03b	51.4804	6.17255	Examinated
Plains	Landcover	RZUA04	48.4948	15.2437	Examinated
Plains	Landcover	RZUA07	33.7551	15.5171	Examinated
Plains	Landcover	RZUA08	44.979	44.8852	Examinated
Plains	Landcover	RZUA09	43.3627	5.63833	Examinated
Plains	Landcover	RZUB03	54.4086	138.731	Examinated
Plains	Landcover	RZUB06	44.1727	19.6748	Examinated
Plains	Landcover	RZUB07	33.1608	14.1693	Examinated
Plains	Landcover	RZUB09	41.9655	33.4658	Examinated
Plains	Landcover	RZUC01	39.006	49.6792	Examinated
Plains	Landcover	RZUC07	36.3147	10.227	Examinated
Plains	Landcover	RZUC08	44.3417	21.3092	Examinated
Plains	Landcover	RZUC11	48.8001	22.3323	Examinated
Plains	Landcover	RZUC12	50.2628	86.4417	Examinated
Plains	Landcover	RZUD02	35.6443	29.3615	Examinated
Plains	Landcover	RZUD03	43.1117	15.777	Examinated
Plains	Landcover	RZUD11	42.1349	58.4756	Examinated
Plains	Landcover	RZUD13	41.8991	25.2906	Examinated
Plains	Landcover	RZUE03	35.6056	18.5379	Examinated
Plains	Landcover	RZUE05	43.113	26.4181	Examinated
Plains	Landcover	RZUE06	35.4327	56.838	Examinated
Plains	Landcover	RZUE08	39.2559	45.4749	Examinated
Plains	Landcover	RZUE10	42.625	28.5829	Examinated
Plains	Landcover	RZUE13	38.3141	8.47534	Examinated
Plains	Landcover	RZUF03	35.8473	26.4592	Examinated
Plains	Landcover	RZUF05	30.5592	8.23402	Examinated
Plains	Landcover	RZUF06	30.4794	12.8894	Examinated
Plains	Landcover	RZUF11	33.898	52.9896	Examinated
Plains	Landcover	RZUG04	30.9282	46.9794	Examinated
Plains	Landcover	RZUG10	35.1933	9.75593	Examinated
Plains	Landcover	RZUG11	35.1528	17.9016	Examinated
Plains	Landcover	RZUH03	34.4809	12.0285	Examinated
Plains	Landcover	RZUH05	24.3621	35.588	Examinated
Plains	Landcover	RZUH07	45.2481	61.9929	Examinated
Plains	Landcover	RZUH08	28.0842	21.0112	Examinated
Plains	Landcover	RZUH10	32.7794	10.5239	Examinated
Plains	SLIC	RZUA01	48.8525	231.142	Examinated
Plains	SLIC	RZUA03b	51.4804	103.965	Examinated
Plains	SLIC	RZUA04	48.4948	144.714	Examinated
Plains	SLIC	RZUA05	51.2419	225.672	Examinated
Plains	SLIC	RZUA06	50.9153	107.041	Examinated
Plains	SLIC	RZUA07	33.7551	160.098	Examinated
Plains	SLIC	RZUA08	44.979	217.428	Examinated
Plains	SLIC	RZUA09	43.3627	160.845	Examinated
Plains	SLIC	RZUA10	52.1499	280.616	Examinated
Plains	SLIC	RZUB01	44.3862	157.031	Examinated
Plains	SLIC	RZUB02	52.6779	158.21	Examinated
Plains	SLIC	RZUB05	50.0404	152.597	Examinated
Plains	SLIC	RZUB06	44.1727	205.067	Examinated
Plains	SLIC	RZUB07	33.1608	213.987	Examinated
Plains	SLIC	RZUB08	33.0486	247.883	Examinated
Plains	SLIC	RZUB09	41.9655	131.68	Examinated
Plains	SLIC	RZUB10	52.6427	117.985	Examinated
Plains	SLIC	RZUB11	53.4949	159.184	Examinated
Plains	SLIC	RZUC01	39.006	233.059	Examinated
Plains	SLIC	RZUC03	53.4107	128.587	Examinated
Plains	SLIC	RZUC06	42.6852	171.698	Examinated
Plains	SLIC	RZUC07	36.3147	142.816	Examinated
Plains	SLIC	RZUC08	44.3417	282.289	Examinated
Plains	SLIC	RZUC09	44.0958	29.0523	Examinated
Plains	SLIC	RZUC10	42.8321	89.4085	Examinated
Plains	SLIC	RZUC11	48.8001	113.696	Examinated
Plains	SLIC	RZUD02	35.6443	126.777	Examinated
Plains	SLIC	RZUD04	53.2315	67.3067	Examinated
Plains	SLIC	RZUD06	44.4688	255.131	Examinated
Plains	SLIC	RZUD09	44.5166	87.1987	Examinated
Plains	SLIC	RZUD11	42.1349	72.264	Examinated
Plains	SLIC	RZUD12	41.9846	146.039	Examinated
Plains	SLIC	RZUD13	41.8991	182.795	Examinated
Plains	SLIC	RZUE01	53.7159	185.06	Examinated
Plains	SLIC	RZUE03	35.6056	115.301	Examinated
Plains	SLIC	RZUE04	53.4442	107.93	Examinated
Plains	SLIC	RZUE05	43.113	166.865	Examinated
Plains	SLIC	RZUE08	39.2559	222.581	Examinated
Plains	SLIC	RZUE09	34.7768	96.9652	Examinated
Plains	SLIC	RZUE10	42.625	241.357	Examinated
Plains	SLIC	RZUE11	28.6547	62.87	Examinated
Plains	SLIC	RZUE13	38.3141	191.66	Examinated
Plains	SLIC	RZUF02	48.1136	235.16	Examinated
Plains	SLIC	RZUF04	45.7257	211.423	Examinated
Plains	SLIC	RZUF05	30.5592	205.986	Examinated
Plains	SLIC	RZUF07	36.3832	166.33	Examinated
Plains	SLIC	RZUF09	38.6474	175.099	Examinated
Plains	SLIC	RZUF10	39.1336	210.793	Examinated
Plains	SLIC	RZUF13	55.1793	120.666	Examinated
Plains	SLIC	RZUG02	47.7856	207.518	Examinated
Plains	SLIC	RZUG03	45.9099	341.508	Examinated
Plains	SLIC	RZUG04	30.9282	124.421	Examinated
Plains	SLIC	RZUG05	37.7634	114.3	Examinated
Plains	SLIC	RZUG06	30.5783	188.831	Examinated
Plains	SLIC	RZUG07	36.2708	252.528	Examinated
Plains	SLIC	RZUG08	30.1537	75.9561	Examinated
Plains	SLIC	RZUG09	33.628	183.892	Examinated
Plains	SLIC	RZUG10	35.1933	127.867	Examinated
Plains	SLIC	RZUG11	35.1528	245.433	Examinated
Plains	SLIC	RZUG13	44.4586	137.863	Examinated
Plains	SLIC	RZUH02	43.886	195.952	Examinated
Plains	SLIC	RZUH03	34.4809	243.472	Examinated
Plains	SLIC	RZUH04	39.7221	243.555	Examinated
Plains	SLIC	RZUH06	28.4849	224.664	Examinated
Plains	SLIC	RZUH07	45.2481	37.0593	Examinated
Plains	SLIC	RZUH08	28.0842	46.1684	Examinated
Plains	SLIC	RZUH09	44.1951	78.9091	Examinated
Plains	SLIC	RZUH10	32.7794	342.995	Examinated
Plains	SLIC	RZUH11	32.29	135.143	Examinated
Plains	SLIC	RZUH12	36.1371	206.365	Examinated
Plains	SLIC	RZUA10	52.0488	0	Poles
Plains	SLIC	RZUA09	43.0004	0	Poles
Plains	SLIC	RZUA05	51.0754	0	Poles
Plains	SLIC	RZUA03b	57.4562	0	Poles
Plains	SLIC	RZUA01	48.3112	0	Poles
Plains	SLIC	RZUA06	49.4686	0	Poles
Plains	SLIC	RZUA08	48.3528	0	Poles
Plains	SLIC	RZUA07	35.0372	0	Poles
Plains	SLIC	RZUA04	53.2825	0	Poles
Plains	SLIC	RZUB08	37.8994	0	Poles
Plains	SLIC	RZUB07	30.45	0	Poles
Plains	SLIC	RZUB05	47.4819	0	Poles
Plains	SLIC	RZUB06	47.6321	0	Poles
Plains	SLIC	RZUB10	54.5195	0	Poles
Plains	SLIC	RZUB11	52.743	0	Poles
Plains	SLIC	RZUC08	33.9268	0	Poles
Plains	SLIC	RZUC09	42.9118	0	Poles
Plains	SLIC	RZUB09	43.9117	0	Poles
Plains	SLIC	RZUB01	44.2315	0	Poles
Plains	SLIC	RZUC10	48.4801	0	Poles
Plains	SLIC	RZUC03	54.4272	0	Poles
Plains	SLIC	RZUC06	53.907	0	Poles
Plains	SLIC	RZUC11	48.0486	0	Poles
Plains	SLIC	RZUD13	52.8459	0	Poles
Plains	SLIC	RZUC07	33.9268	0	Poles
Plains	SLIC	RZUC01	50.7278	0	Poles
Plains	SLIC	RZUD02	40.6014	0	Poles
Plains	SLIC	RZUD11	45.4207	0	Poles
Plains	SLIC	RZUD04	53.8924	0	Poles
Plains	SLIC	RZUD06	48.6419	0	Poles
Plains	SLIC	RZUE01	52.9537	0	Poles
Plains	SLIC	RZUE05	45.1408	0	Poles
Plains	SLIC	RZUD09	44.2618	0	Poles
Plains	SLIC	RZUE08	46.8568	0	Poles
Plains	SLIC	RZUD12	51.2819	0	Poles
Plains	SLIC	RZUE04	56.9848	0	Poles
Plains	SLIC	RZUF07	32.2468	0	Poles
Plains	SLIC	RZUE10	46.0889	0	Poles
Plains	SLIC	RZUE11	26.423	0	Poles
Plains	SLIC	RZUE03	31.4789	0	Poles
Plains	SLIC	RZUF05	31.7417	0	Poles
Plains	SLIC	RZUF02	55.1522	0	Poles
Plains	SLIC	RZUE09	32.8983	0	Poles
Plains	SLIC	RZUF13	56.4534	0	Poles
Plains	SLIC	RZUE13	32.7562	0	Poles
Plains	SLIC	RZUF10	32.4605	0	Poles
Plains	SLIC	RZUF09	41.7123	0	Poles
Plains	SLIC	RZUG03	39.1358	0	Poles
Plains	SLIC	RZUG02	52.6	0	Poles
Plains	SLIC	RZUG07	40.9026	0	Poles
Plains	SLIC	RZUG06	34.5937	0	Poles
Plains	SLIC	RZUG13	48.1982	0	Poles
Plains	SLIC	RZUG04	29.1642	0	Poles
Plains	SLIC	RZUG08	31.822	0	Poles
Plains	SLIC	RZUG11	35.9114	0	Poles
Plains	SLIC	RZUG09	31.8797	0	Poles
Plains	SLIC	RZUH10	48.4381	0	Poles
Plains	SLIC	RZUH09	48.4381	0	Poles
Plains	SLIC	RZUG05	37.733	0	Poles
Plains	SLIC	RZUH12	35.9728	0	Poles
Plains	SLIC	RZUH07	47.6567	0	Poles
Plains	SLIC	RZUG10	35.3671	0	Poles
Plains	SLIC	RZUH03	35.5751	0	Poles
Plains	SLIC	RZUH08	28.5604	0	Poles
Plains	SLIC	RZUH04	25.9852	0	Poles
Plains	SLIC	RZUH11	33.2499	0	Poles
Plains	SLIC	RZUH02	47.7943	0	Poles
Plains	SLIC	RZUH06	40.2103	0	Poles
Plains	SLIC	RZUB02	50.9461	0	Poles
Plains	SLIC	RZUF04	44.3603	0	Poles
AndeanRural	SLIC	A03	46.4395	0	Poles
AndeanRural	SLIC	B01	45.721	0	Poles
AndeanRural	SLIC	A05	50.4168	0	Poles
AndeanRural	SLIC	A04	50.0531	0	Poles
AndeanRural	SLIC	B02	46.5488	0	Poles
AndeanRural	SLIC	B04	49.4825	0	Poles
AndeanRural	SLIC	C07	53.2437	0	Poles
AndeanRural	SLIC	C02	53.2668	0	Poles
AndeanRural	SLIC	D05	50.836	0	Poles
AndeanRural	SLIC	D04	52.2276	0	Poles
AndeanRural	SLIC	C01	48.9582	0	Poles
AndeanRural	SLIC	D01	42.3764	0	Poles
AndeanRural	SLIC	D03	48.3904	0	Poles
AndeanRural	SLIC	D02	51.9413	0	Poles
AndeanRural	SLIC	E03	49.2484	0	Poles
AndeanRural	SLIC	E07	51.7544	0	Poles
AndeanRural	SLIC	E06	52.2673	0	Poles
AndeanRural	SLIC	E05	48.7138	0	Poles
AndeanRural	SLIC	E04	54.227	0	Poles
AndeanRural	SLIC	F06	49.823	0	Poles
AndeanRural	SLIC	G02	46.3526	0	Poles
AndeanRural	SLIC	F03	50.6743	0	Poles
AndeanRural	SLIC	F05	49.7214	0	Poles
AndeanRural	SLIC	G05	52.5964	0	Poles
AndeanRural	SLIC	F07	49.823	0	Poles
AndeanRural	SLIC	F02	36.4069	0	Poles
AndeanRural	SLIC	G03	47.7905	0	Poles
AndeanRural	SLIC	G08	51.0546	0	Poles
AndeanRural	SLIC	G06	51.0498	0	Poles
AndeanRural	SLIC	C05	47.2097	0	Poles
AndeanRural	SLIC	D07	47.0896	0	Poles
AndeanUrban	SLIC	LEA01	58.7692	0	Poles
AndeanUrban	SLIC	LEA05	53.3335	0	Poles
AndeanUrban	SLIC	LEA03	58.5026	0	Poles
AndeanUrban	SLIC	LEA02	58.1762	0	Poles
AndeanUrban	SLIC	LEA04	53.3335	0	Poles
AndeanUrban	SLIC	LEB02	59.249	0	Poles
AndeanUrban	SLIC	LEB04	60.6437	0	Poles
AndeanUrban	SLIC	LEC01	60.0983	0	Poles
AndeanUrban	SLIC	LEB03	57.6069	0	Poles
AndeanUrban	SLIC	LEC03	58.9717	0	Poles
AndeanUrban	SLIC	LEB01	59.3461	0	Poles
AndeanUrban	SLIC	LEC07	57.539	0	Poles
AndeanUrban	SLIC	LEE04	55.8628	0	Poles
AndeanUrban	SLIC	LEC06	56.9835	0	Poles
AndeanUrban	SLIC	LED01	61.4811	0	Poles
AndeanUrban	SLIC	LEC05	55.4611	0	Poles
AndeanUrban	SLIC	LEF01	52.1832	0	Poles
AndeanUrban	SLIC	LEF07	53.6822	0	Poles
AndeanUrban	SLIC	LED02	55.7563	0	Poles
AndeanUrban	SLIC	LEE05	55.5878	0	Poles
AndeanUrban	SLIC	LEE03	47.0868	0	Poles
AndeanUrban	SLIC	LEE06	57.6558	0	Poles
AndeanUrban	SLIC	LED03	53.7145	0	Poles
AndeanUrban	SLIC	LEF02	40.6936	0	Poles
AndeanUrban	SLIC	LED05	50.1362	0	Poles
AndeanUrban	SLIC	LEH10	47.2982	0	Poles
AndeanUrban	SLIC	LEG02	33.7129	0	Poles
AndeanUrban	SLIC	LEH05	51.321	0	Poles
AndeanUrban	SLIC	LEH06	46.7098	0	Poles
AndeanUrban	SLIC	LEG01	33.7129	0	Poles
AndeanUrban	SLIC	LEI01	37.3122	0	Poles
AndeanUrban	SLIC	LEH07	54.1031	0	Poles
AndeanUrban	SLIC	LEH03	43.6134	0	Poles
AndeanUrban	SLIC	LEJ02	37.211	0	Poles
AndeanUrban	SLIC	LEI04	53.4591	0	Poles
AndeanUrban	SLIC	LEI03	50.7978	0	Poles
AndeanUrban	SLIC	LEI05	47.9521	0	Poles
AndeanUrban	SLIC	LEJ03	38.5421	0	Poles
AndeanUrban	SLIC	LEJ04	31.9333	0	Poles
AndeanUrban	SLIC	LEJ05	32.7848	0	Poles
AndeanUrban	SLIC	LEJ01	37.3122	0	Poles
AndeanUrban	SLIC	LEM03	50.2365	0	Poles
AndeanUrban	SLIC	LEK02	32.3664	0	Poles
AndeanUrban	SLIC	LEK05	48.6306	0	Poles
AndeanUrban	SLIC	LEK06	53.6352	0	Poles
AndeanUrban	SLIC	LEM04	57.0381	0	Poles
AndeanUrban	SLIC	LEM01	56.0762	0	Poles
AndeanUrban	SLIC	LEO01	49.8354	0	Poles
AndeanUrban	SLIC	LEN02	50.8889	0	Poles
AndeanUrban	SLIC	LEO02	51.1561	0	Poles
Plains	basins	RZUB01	49.2584	0	Poles
Plains	basins	RZUG02	46.8438	0	Poles
Plains	basins	RZUC01	35.0575	0	Poles
Plains	basins	RZUD02	37.5691	0	Poles
Plains	basins	RZUE02	54.3966	0	Poles
Plains	basins	RZUH02	49.6579	0	Poles
Plains	basins	RZUC02	39.0657	0	Poles
Plains	basins	RZUH03	30.7786	0	Poles
Plains	basins	RZUF03	36.7967	0	Poles
Plains	basins	RZUH04	35.1741	0	Poles
Plains	basins	RZUB03	49.8864	0	Poles
Plains	basins	RZUD04	55.7052	0	Poles
Plains	basins	RZUA04	39.2976	0	Poles
Plains	basins	RZUB05	49.4808	0	Poles
Plains	basins	RZUE05	46.1682	0	Poles
Plains	basins	RZUH05	26.1833	0	Poles
Plains	basins	RZUD05	37.2755	0	Poles
Plains	basins	RZUC05	46.7379	0	Poles
Plains	basins	RZUB06	50.7052	0	Poles
Plains	basins	RZUA05	46.1211	0	Poles
Plains	basins	RZUF05	30.4565	0	Poles
Plains	basins	RZUE06	37.5676	0	Poles
Plains	basins	RZUA06	48.6223	0	Poles
Plains	basins	RZUH07	30.1794	0	Poles
Plains	basins	RZUG06	31.0102	0	Poles
Plains	basins	RZUE07	40.5503	0	Poles
Plains	basins	RZUD07	41.1858	0	Poles
Plains	basins	RZUA07	32.1842	0	Poles
Plains	basins	RZUG08	33.661	0	Poles
Plains	basins	RZUC08	38.2152	0	Poles
Plains	basins	RZUE08	33.9924	0	Poles
Plains	basins	RZUD08	46.7006	0	Poles
Plains	basins	RZUH09	38.0589	0	Poles
Plains	basins	RZUC09	42.9055	0	Poles
Plains	basins	RZUG09	32.4664	0	Poles
Plains	basins	RZUB08	36.5415	0	Poles
Plains	basins	RZUH08	38.0589	0	Poles
Plains	basins	RZUE09	34.6897	0	Poles
Plains	basins	RZUB09	45.004	0	Poles
Plains	basins	RZUB10	52.4648	0	Poles
Plains	basins	RZUA09	45.0877	0	Poles
Plains	basins	RZUF10	35.5072	0	Poles
Plains	basins	RZUC10	40.157	0	Poles
Plains	basins	RZUG10	30.2005	0	Poles
Plains	basins	RZUD10	32.407	0	Poles
Plains	basins	RZUE11	37.6986	0	Poles
Plains	basins	RZUH11	34.5687	0	Poles
Plains	basins	RZUH12	36.8614	0	Poles
Plains	basins	RZUB11	53.1554	0	Poles
Plains	basins	RZUF12	40.2385	0	Poles
Plains	basins	RZUD12	38.2096	0	Poles
Plains	basins	RZUC12	38.2096	0	Poles
Plains	basins	RZUE13	51.7141	0	Poles
Plains	basins	RZUG13	50.0945	0	Poles
Plains	basins	RZUH13	46.6757	0	Poles
Plains	basins	RZUA10	52.4648	0	Poles
Plains	basins	RZUC03	39.0657	0	Poles
Plains	Landcover	RZUC01	42.0834	0	Poles
Plains	Landcover	RZUH03	35.8893	0	Poles
Plains	Landcover	RZUD02	35.7819	0	Poles
Plains	Landcover	RZUA03b	52.1463	0	Poles
Plains	Landcover	RZUD03	42.5884	0	Poles
Plains	Landcover	RZUE03	34.6326	0	Poles
Plains	Landcover	RZUF03	36.5116	0	Poles
Plains	Landcover	RZUG04	29.9393	0	Poles
Plains	Landcover	RZUA04	48.7269	0	Poles
Plains	Landcover	RZUH05	24.6381	0	Poles
Plains	Landcover	RZUF06	31.0951	0	Poles
Plains	Landcover	RZUE05	43.7055	0	Poles
Plains	Landcover	RZUE06	35.6895	0	Poles
Plains	Landcover	RZUA07	32.7196	0	Poles
Plains	Landcover	RZUB07	33.0227	0	Poles
Plains	Landcover	RZUC07	37.3275	0	Poles
Plains	Landcover	RZUB03	58.2493	0	Poles
Plains	Landcover	RZUA08	44.2654	0	Poles
Plains	Landcover	RZUC08	44.5253	0	Poles
Plains	Landcover	RZUF05	29.9058	0	Poles
Plains	Landcover	RZUB06	44.2337	0	Poles
Plains	Landcover	RZUH07	45.3621	0	Poles
Plains	Landcover	RZUA09	46.1549	0	Poles
Plains	Landcover	RZUH08	27.7544	0	Poles
Plains	Landcover	RZUB09	42.0309	0	Poles
Plains	Landcover	RZUG10	35.3316	0	Poles
Plains	Landcover	RZUE08	36.3517	0	Poles
Plains	Landcover	RZUH10	33.0868	0	Poles
Plains	Landcover	RZUC11	49.9404	0	Poles
Plains	Landcover	RZUD11	41.2914	0	Poles
Plains	Landcover	RZUF11	34.7805	0	Poles
Plains	Landcover	RZUE10	40.4841	0	Poles
Plains	Landcover	RZUE13	38.3444	0	Poles
Plains	Landcover	RZUG11	34.7892	0	Poles
Plains	Landcover	RZUD13	43.8028	0	Poles
Plains	Landcover	RZUC12	44.8751	0	Poles
Plains	Landcover	RZUA02	53.8254	0	Poles
Plains	Landcover	RZUA03a	52.1463	0	Poles
Plains	halfbasins	RZUA01	53.703	0	Poles
Plains	halfbasins	RZUD01M	42.3729	0	Poles
Plains	halfbasins	RZUB01	47.5401	0	Poles
Plains	halfbasins	RZUG02	44.954	0	Poles
Plains	halfbasins	RZUC01	42.2753	0	Poles
Plains	halfbasins	RZUD02	34.1339	0	Poles
Plains	halfbasins	RZUE01	53.3435	0	Poles
Plains	halfbasins	RZUH02	50.311	0	Poles
Plains	halfbasins	RZUE02	53.3435	0	Poles
Plains	halfbasins	RZUC02	34.1935	0	Poles
Plains	halfbasins	RZUC03	43.4875	0	Poles
Plains	halfbasins	RZUF02	53.9159	0	Poles
Plains	halfbasins	RZUH03	34.9805	0	Poles
Plains	halfbasins	RZUB03	51.9563	0	Poles
Plains	halfbasins	RZUD03	38.9659	0	Poles
Plains	halfbasins	RZUH04	33.8539	0	Poles
Plains	halfbasins	RZUA03b	53.3296	0	Poles
Plains	halfbasins	RZUD04	55.7052	0	Poles
Plains	halfbasins	RZUE04	53.7436	0	Poles
Plains	halfbasins	RZUA04	53.3296	0	Poles
Plains	halfbasins	RZUB05	51.7807	0	Poles
Plains	halfbasins	RZUD05	38.6676	0	Poles
Plains	halfbasins	RZUE05	45.8949	0	Poles
Plains	halfbasins	RZUH05	29.8206	0	Poles
Plains	halfbasins	RZUC05	50.2153	0	Poles
Plains	halfbasins	RZUB06	46.8746	0	Poles
Plains	halfbasins	RZUA05	47.6367	0	Poles
Plains	halfbasins	RZUG05	35.1495	0	Poles
Plains	halfbasins	RZUF05	40.1401	0	Poles
Plains	halfbasins	RZUG06	30.0234	0	Poles
Plains	halfbasins	RZUE06	36.8009	0	Poles
Plains	halfbasins	RZUA06	45.8846	0	Poles
Plains	halfbasins	RZUH07	36.0569	0	Poles
Plains	halfbasins	RZUA07	30.7449	0	Poles
Plains	halfbasins	RZUG07	31.962	0	Poles
Plains	halfbasins	RZUE07	33.8509	0	Poles
Plains	halfbasins	RZUD07	42.2922	0	Poles
Plains	halfbasins	RZUC07	34.543	0	Poles
Plains	halfbasins	RZUE08	37.9376	0	Poles
Plains	halfbasins	RZUG08	32.0568	0	Poles
Plains	halfbasins	RZUC08	39.0391	0	Poles
Plains	halfbasins	RZUF08	37.9376	0	Poles
Plains	halfbasins	RZUB08	34.5184	0	Poles
Plains	halfbasins	RZUD08	45.0936	0	Poles
Plains	halfbasins	RZUD09	40.9388	0	Poles
Plains	halfbasins	RZUH09	38.0589	0	Poles
Plains	halfbasins	RZUC09	44.9253	0	Poles
Plains	halfbasins	RZUG09	28.1372	0	Poles
Plains	halfbasins	RZUA08	46.5231	0	Poles
Plains	halfbasins	RZUH08	27.6893	0	Poles
Plains	halfbasins	RZUE09	36.3291	0	Poles
Plains	halfbasins	RZUB09	44.7751	0	Poles
Plains	halfbasins	RZUA09	41.95	0	Poles
Plains	halfbasins	RZUD10	32.0706	0	Poles
Plains	halfbasins	RZUF10	39.0983	0	Poles
Plains	halfbasins	RZUA10	52.1456	0	Poles
Plains	halfbasins	RZUH10	38.0935	0	Poles
Plains	halfbasins	RZUC10	43.2775	0	Poles
Plains	halfbasins	RZUD11	32.0706	0	Poles
Plains	halfbasins	RZUF11	34.1073	0	Poles
Plains	halfbasins	RZUE11	31.9028	0	Poles
Plains	halfbasins	RZUH11	34.4307	0	Poles
Plains	halfbasins	RZUH12	36.8262	0	Poles
Plains	halfbasins	RZUB11	51.6968	0	Poles
Plains	halfbasins	RZUD12	42.7165	0	Poles
Plains	halfbasins	RZUE12	50.545	0	Poles
Plains	halfbasins	RZUG12	38.1025	0	Poles
Plains	halfbasins	RZUD13	50.551	0	Poles
Plains	halfbasins	RZUC12	40.2484	0	Poles
Plains	halfbasins	RZUE13	46.0782	0	Poles
Plains	halfbasins	RZUG13	48.0711	0	Poles
Plains	halfbasins	RZUH13	46.3818	0	Poles
Plains	halfbasins	RZUB10	50.4587	0	Poles
Plains	halfbasins	RZUA03a	53.3296	0	Poles
AndeanRural	Landcover	C02	50.3216	0	Poles
AndeanRural	Landcover	G03	51.0014	0	Poles
AndeanRural	Landcover	C03	48.6557	0	Poles
AndeanRural	Landcover	D03	49.3005	0	Poles
AndeanRural	Landcover	F02	44.4984	0	Poles
AndeanRural	Landcover	B04	47.3565	0	Poles
AndeanRural	Landcover	B02	45.3634	0	Poles
AndeanRural	Landcover	F03	50.5561	0	Poles
AndeanRural	Landcover	G04	49.9484	0	Poles
AndeanRural	Landcover	D05	53.005	0	Poles
AndeanRural	Landcover	C05	50.2432	0	Poles
AndeanRural	Landcover	A03	46.3014	0	Poles
AndeanRural	Landcover	E05	49.8894	0	Poles
AndeanRural	Landcover	C04	53.1817	0	Poles
AndeanRural	Landcover	A05	49.4177	0	Poles
AndeanRural	Landcover	F07	51.5123	0	Poles
AndeanRural	Landcover	C07	46.8915	0	Poles
AndeanRural	Landcover	B06	44.7888	0	Poles
AndeanRural	Landcover	G06	52.9819	0	Poles
AndeanRural	Landcover	F08	48.7679	0	Poles
AndeanRural	Landcover	G08	50.8171	0	Poles
AndeanRural	Landcover	B01	46.8046	0	Poles
AndeanRural	Landcover	G02	47.3559	0	Poles
AndeanRural	basins	C01	43.1477	0	Poles
AndeanRural	basins	D01	42.1691	0	Poles
AndeanRural	basins	B02	44.2041	0	Poles
AndeanRural	basins	C02	50.6447	0	Poles
AndeanRural	basins	B03	44.2041	0	Poles
AndeanRural	basins	F03	49.4384	0	Poles
AndeanRural	basins	E03	44.5305	0	Poles
AndeanRural	basins	C03	48.2769	0	Poles
AndeanRural	basins	A03	43.0574	0	Poles
AndeanRural	basins	B04	46.9562	0	Poles
AndeanRural	basins	D04	53.8964	0	Poles
AndeanRural	basins	F04	51.9071	0	Poles
AndeanRural	basins	A04	49.3991	0	Poles
AndeanRural	basins	G04	49.4533	0	Poles
AndeanRural	basins	B05	51.0958	0	Poles
AndeanRural	basins	A05	51.488	0	Poles
AndeanRural	basins	C05	49.5572	0	Poles
AndeanRural	basins	B06	45.4187	0	Poles
AndeanRural	basins	D06	53.6363	0	Poles
AndeanRural	basins	C06	47.0214	0	Poles
AndeanRural	basins	F05	49.6861	0	Poles
AndeanRural	basins	E06	48.4788	0	Poles
AndeanRural	basins	F07	51.5864	0	Poles
AndeanRural	basins	C07	50.7919	0	Poles
AndeanRural	basins	G08	51.4742	0	Poles
AndeanRural	basins	D07	46.5225	0	Poles
AndeanRural	basins	F08	47.2717	0	Poles
AndeanRural	basins	B01	46.1313	0	Poles
AndeanRural	basins	E07	51.5864	0	Poles
AndeanRural	halfbasins	C01	45.7152	0	Poles
AndeanRural	halfbasins	D01	45.7083	0	Poles
AndeanRural	halfbasins	B02	44.9573	0	Poles
AndeanRural	halfbasins	C02	50.6447	0	Poles
AndeanRural	halfbasins	C03	50.1961	0	Poles
AndeanRural	halfbasins	B03	43.9919	0	Poles
AndeanRural	halfbasins	F03	46.8134	0	Poles
AndeanRural	halfbasins	E03	44.5305	0	Poles
AndeanRural	halfbasins	D04	52.5935	0	Poles
AndeanRural	halfbasins	A03	43.0574	0	Poles
AndeanRural	halfbasins	B04	47.503	0	Poles
AndeanRural	halfbasins	D03	49.9826	0	Poles
AndeanRural	halfbasins	F04	50.7081	0	Poles
AndeanRural	halfbasins	A04	50.204	0	Poles
AndeanRural	halfbasins	G04	49.4533	0	Poles
AndeanRural	halfbasins	B05	51.6108	0	Poles
AndeanRural	halfbasins	A05	48.0308	0	Poles
AndeanRural	halfbasins	D05	50.3987	0	Poles
AndeanRural	halfbasins	B06	43.7613	0	Poles
AndeanRural	halfbasins	D06	53.6363	0	Poles
AndeanRural	halfbasins	C06	45.8158	0	Poles
AndeanRural	halfbasins	F05	50.3207	0	Poles
AndeanRural	halfbasins	E06	50.5007	0	Poles
AndeanRural	halfbasins	F07	51.61	0	Poles
AndeanRural	halfbasins	C07	50.5182	0	Poles
AndeanRural	halfbasins	G08	52.265	0	Poles
AndeanRural	halfbasins	D07	53.38	0	Poles
AndeanRural	halfbasins	F08	50.8886	0	Poles
AndeanRural	halfbasins	B01	47.3995	0	Poles
AndeanRural	halfbasins	G02	48.7289	0	Poles
AndeanRural	halfbasins	E07	51.7727	0	Poles
AndeanRural	halfbasins	C05	50.8891	0	Poles
AndeanUrban	basins	LEF01	53.7877	0	Poles
AndeanUrban	basins	LEH01	35.2959	0	Poles
AndeanUrban	basins	LEC01	60.4875	0	Poles
AndeanUrban	basins	LEG01	35.2959	0	Poles
AndeanUrban	basins	LEK01	30.5571	0	Poles
AndeanUrban	basins	LEA01	59.7406	0	Poles
AndeanUrban	basins	LEG02	26.2324	0	Poles
AndeanUrban	basins	LEF02	32.2751	0	Poles
AndeanUrban	basins	LEI01	26.0913	0	Poles
AndeanUrban	basins	LED01	62.9827	0	Poles
AndeanUrban	basins	LEK02	32.797	0	Poles
AndeanUrban	basins	LEE03	49.7894	0	Poles
AndeanUrban	basins	LEB01	58.9234	0	Poles
AndeanUrban	basins	LEA02	58.0929	0	Poles
AndeanUrban	basins	LEH03	47.3523	0	Poles
AndeanUrban	basins	LEJ01	26.0913	0	Poles
AndeanUrban	basins	LEE05	49.7626	0	Poles
AndeanUrban	basins	LEC03	60.6164	0	Poles
AndeanUrban	basins	LEJ02	38.1693	0	Poles
AndeanUrban	basins	LEB02	59.1823	0	Poles
AndeanUrban	basins	LEH05	53.0291	0	Poles
AndeanUrban	basins	LEA03	56.8701	0	Poles
AndeanUrban	basins	LEH06	38.4251	0	Poles
AndeanUrban	basins	LED03	49.4773	0	Poles
AndeanUrban	basins	LEJ03	39.9499	0	Poles
AndeanUrban	basins	LED02	59.2467	0	Poles
AndeanUrban	basins	LEA04	55.2051	0	Poles
AndeanUrban	basins	LEH07	50.0308	0	Poles
AndeanUrban	basins	LEB03	59.1699	0	Poles
AndeanUrban	basins	LEI03	50.0308	0	Poles
AndeanUrban	basins	LEJ04	32.6027	0	Poles
AndeanUrban	basins	LEA05	60.4001	0	Poles
AndeanUrban	basins	LEM01	52.4294	0	Poles
AndeanUrban	basins	LEB04	60.8382	0	Poles
AndeanUrban	basins	LEF07	53.3132	0	Poles
AndeanUrban	basins	LEI04	47.0481	0	Poles
AndeanUrban	basins	LEO01	49.9232	0	Poles
AndeanUrban	basins	LEH09	49.1343	0	Poles
AndeanUrban	basins	LEO02	49.7696	0	Poles
AndeanUrban	basins	LEN02	51.6289	0	Poles
AndeanUrban	basins	LEC06	56.5814	0	Poles
AndeanUrban	basins	LEH10	50.3796	0	Poles
AndeanUrban	basins	LEI05	51.8258	0	Poles
AndeanUrban	basins	LEM03	45.6292	0	Poles
AndeanUrban	basins	LED05	55.7455	0	Poles
AndeanUrban	basins	LEJ05	38.9171	0	Poles
AndeanUrban	basins	LEM04	57.8286	0	Poles
AndeanUrban	basins	LEK05	43.7232	0	Poles
AndeanUrban	basins	LEC07	58.5311	0	Poles
AndeanUrban	basins	LEK06	51.0535	0	Poles
AndeanUrban	halfbasins	LEF01	53.7989	0	Poles
AndeanUrban	halfbasins	LEH01	36.9662	0	Poles
AndeanUrban	halfbasins	LEC01	59.1174	0	Poles
AndeanUrban	halfbasins	LEG01	36.8689	0	Poles
AndeanUrban	halfbasins	LEK01	36.178	0	Poles
AndeanUrban	halfbasins	LEG02	30.7222	0	Poles
AndeanUrban	halfbasins	LEA01	62.9601	0	Poles
AndeanUrban	halfbasins	LEF02	34.8098	0	Poles
AndeanUrban	halfbasins	LEI01	34.1179	0	Poles
AndeanUrban	halfbasins	LED01	57.8868	0	Poles
AndeanUrban	halfbasins	LEK02	30.1395	0	Poles
AndeanUrban	halfbasins	LEE03	53.0138	0	Poles
AndeanUrban	halfbasins	LEB01	60.8926	0	Poles
AndeanUrban	halfbasins	LEA02	60.2815	0	Poles
AndeanUrban	halfbasins	LEH03	45.2925	0	Poles
AndeanUrban	halfbasins	LEJ01	28.7613	0	Poles
AndeanUrban	halfbasins	LEE05	53.73	0	Poles
AndeanUrban	halfbasins	LEC03	62.6856	0	Poles
AndeanUrban	halfbasins	LEJ02	40.4518	0	Poles
AndeanUrban	halfbasins	LEB02	59.1823	0	Poles
AndeanUrban	halfbasins	LEH05	51.0922	0	Poles
AndeanUrban	halfbasins	LEA03	58.4448	0	Poles
AndeanUrban	halfbasins	LEH06	38.4251	0	Poles
AndeanUrban	halfbasins	LED03	52.0008	0	Poles
AndeanUrban	halfbasins	LEE06	54.7824	0	Poles
AndeanUrban	halfbasins	LEJ03	42.6432	0	Poles
AndeanUrban	halfbasins	LED02	57.9103	0	Poles
AndeanUrban	halfbasins	LEA04	53.2815	0	Poles
AndeanUrban	halfbasins	LEH07	52.3063	0	Poles
AndeanUrban	halfbasins	LEC05	54.5638	0	Poles
AndeanUrban	halfbasins	LEB03	59.3819	0	Poles
AndeanUrban	halfbasins	LEI03	52.845	0	Poles
AndeanUrban	halfbasins	LEJ04	31.4958	0	Poles
AndeanUrban	halfbasins	LEA05	57.5346	0	Poles
AndeanUrban	halfbasins	LEM01	52.8761	0	Poles
AndeanUrban	halfbasins	LEB04	57.6098	0	Poles
AndeanUrban	halfbasins	LEF07	54.9702	0	Poles
AndeanUrban	halfbasins	LEO01	50.6614	0	Poles
AndeanUrban	halfbasins	LEI04	45.5491	0	Poles
AndeanUrban	halfbasins	LEH09	52.9378	0	Poles
AndeanUrban	halfbasins	LEO02	49.5153	0	Poles
AndeanUrban	halfbasins	LEN02	51.2904	0	Poles
AndeanUrban	halfbasins	LEC06	59.3654	0	Poles
AndeanUrban	halfbasins	LEH10	48.4015	0	Poles
AndeanUrban	halfbasins	LEI05	53.3506	0	Poles
AndeanUrban	halfbasins	LEM03	45.6937	0	Poles
AndeanUrban	halfbasins	LED05	55.7455	0	Poles
AndeanUrban	halfbasins	LEJ05	42.3939	0	Poles
AndeanUrban	halfbasins	LEK05	44.1509	0	Poles
AndeanUrban	halfbasins	LEM04	55.9592	0	Poles
AndeanUrban	halfbasins	LEL03	46.9588	0	Poles
AndeanUrban	halfbasins	LEC07	58.6786	0	Poles
AndeanUrban	halfbasins	LEK06	49.4349	0	Poles
AndeanUrban	Landcover	LEF01	48.9944	0	Poles
AndeanUrban	Landcover	LEE03	48.497	0	Poles
AndeanUrban	Landcover	LEK01	30.6429	0	Poles
AndeanUrban	Landcover	LEE04	56.9597	0	Poles
AndeanUrban	Landcover	LEG02	25.5737	0	Poles
AndeanUrban	Landcover	LEH01	45.3385	0	Poles
AndeanUrban	Landcover	LEH05	49.3898	0	Poles
AndeanUrban	Landcover	LED03	50.4031	0	Poles
AndeanUrban	Landcover	LEC05	58.0307	0	Poles
AndeanUrban	Landcover	LEI03	52.1231	0	Poles
AndeanUrban	Landcover	LEH09	45.556	0	Poles
AndeanUrban	Landcover	LEI04	52.4737	0	Poles
AndeanUrban	Landcover	LEI05	50.9634	0	Poles
AndeanUrban	Landcover	LEM03	44.4929	0	Poles
AndeanUrban	Landcover	LEO02	50.0823	0	Poles
AndeanUrban	Landcover	LEJ05	35.8586	0	Poles
AndeanUrban	Landcover	LEH10	48.2972	0	Poles
AndeanUrban	Landcover	LEN02	51.4129	0	Poles
AndeanUrban	Landcover	LEL03	47.2815	0	Poles
AndeanUrban	Landcover	LEK06	48.1385	0	Poles
AndeanUrban	Landcover	LEJ03	41.5081	0	Poles
AndeanUrban	Landcover	LEA03	62.2915	0	Poles
AndeanUrban	Landcover	LEM01	53.4913	0	Poles

## Sheet: METADATA
Variable	Description
Locality	Sampling region or landscape unit where the subsampling strategy was applied.
Tessell	Type of tessellation-based subsampling strategy used for selecting sampling units (e.g., Basins, SLIC, Landcover, Halfbasins).
field_number_PR	Unique field identifier assigned to each sampling unit or polygon, typically matching field or grid reference codes.
L_proxy_mean	Mean value of the landscape heterogeneity proxy for the corresponding tessellated subunit. Used to compare landscape structure between sampling strategies and the full landscape.
distance_to_pole	Euclidean distance from the sampling unit centroid to the original pre-defined sampling pole. Used to assess spatial displacement error introduced by strategy-based sampling.
Procedence	Origin of the sampling unit: "Examinated" indicates directly visited/validated field locations, in this case, the one closest to the pole of inaccessibility; on the other hand, other Poles represent the point directly associated with the pole of inaccessibility
