# Supplementary material for: A workflow to optimize spatial sampling in ecoacoustic studies
Source: Research Square preprint supplement (doi:10.21203/rs.3.rs-7207339/v1), 2025-10-10
Supplement: Supplementary file 22 [file UDAS_AndeanRural.xlsx]

## Sheet: Vocabulary
Variable	Class	Variable	Value	Units
1	Project	Method_PR	Pasivo	text
2	Project	field_number_PR	Nombre de carpeta con grabaciones	text
3	Project	voucher_PR	Aplica cuando es grabacion direccional	text
4	Project	collector_first_name_PR		text
5	Project	collector_last_name_PR		text
6	Project	collector_email_PR		text
7	Project	project_name_PR		text
8	Project	funding_PR	Entidad financiadora	text
9	Geographic Information	country_IG		text
10	Geographic Information	department_IG		text
11	Geographic Information	municipality_IG		text
12	Geographic Information	vereda_IG		text
13	Geographic Information	locality_IG		text
14	Geographic Information	latitude_IG	en decimales	numeric, decimal
15	Geographic Information	longitud_IG	en decimales	numeric, decimal
16	Geographic Information	coordinates_source_IG	e.g., GPS, Celular, GoogleEarth, etc	text
17	Geographic Information	precision_IG	en metros	numeric
18	Geographic Information	datum_IG	e.g., WGS84	numeric
19	Geographic Information	min_elevation_IG
20	Geographic Information	max_elevation_IG
21	Date information	year_int_TI	Año inicio	numeric
22	Date information	month_init_TI	Mes inicio	numeric
23	Date information	day_init_TI	Día inicio	numeric
24	Date information	year_end_TI	Año fin	numeric
25	Date information	month_end_TI	Mes fin	numeric
26	Date information	day_end_TI	Día fin	numeric
27	Date information	obs_TI	Observaciones fechas	numeric
28	Recorder	recorder_RE	marca grabadora	text
29	Recorder	rec_case_RE	carcasa de la grabadora (si aplica)	text
30	Recorder	rec_serial_RE	serial de la grabadora	alphanumeric
31	Recorder	microphone_RE		text
32	Recorder	mic_serial_RE		alphanumeric
33	Recorder	channels_RE	e.g., mono	text
34	Recorder	filters_RE		text
35	Recorder	gain_RE	ganancia en decibeles	numeric
36	Recorder	power_source_RE	Tipo de baterias o fuente de poder	text
37	Recorder	memory_card_RE	marca de la memoria	text
38	Recorder	obs_RE		text
39	Habitat	habitat_HA	basado en observacion in situ	text
40	Habitat	rec_height_HA	altura de despliegue de la grabadora	numeric
41	Habitat	season_HA	e.g., lluvia, seca, transicion	text
42	Habitat	climatic_data_HA	e.g., Temperatura, Humedad, etc.	text
43	Habitat	obs_HA		text
44	Landscape variables	Buffer_LV	Búffer de posición	numeric
45	Landscape variables	Cobdos_LV	Cobertura de dosel, obtenido de CANOPEO	numeric
46	Landscape variables	Perf_LV	Perfil de vegetación, obtenido de CANOPEO	numeric
47	Landscape variables	DC_LV	Distancia al centro del pozo	numeric
48	Landscape variables	DCO_LV	Distancia a construcciones o zona industrial comercial	numeric
49	Landscape variables	VS_LV	Distancia a vías	numeric
50	Landscape variables	DOS_LV	Altura del dosel, obtenido de Potapov et al. 2020	numeric
51	Landscape variables	AG_LV	Distancia a cuerpos de agua	numeric
52	Landscape variables	ZI_LV	Distancia a zonas inundables	numeric
53	Landscape variables	COV_LV	Cobertura dominante	text
54	Multimedia	Video_MM	Bajo evaluación
55	Multimedia	Image_MM

## Sheet: Template
Method_PR	field_number_PR	voucher_PR	collector_first_name_PR	collector_last_name_PR	collector_email_PR	project_name_PR	funding_PR	country_IG	department_IG	municipality_IG	vereda_IG	locality_IG	latitude_IG	longitud_IG	coordinates_source_IG	precision_IG	datum_IG	min_elevation_IG	max_elevation_IG	year_init_TI	month_init_TI	day_init_TI	year_end_TI	month_end_TI	day_end_TI	obs_TI	recorder_RE	rec_case_RE	rec_serial_RE	microphone_RE	mic_serial_RE	channels_RE	samp_rate_RE	filters_RE	gain_RE	power_source_RE	memory_card_RE	obs_RE	habitat_HA	rec_height_HA	season_HA	climatic_data_HA	obs_HA
Pasivo	A02		Victor M.	Martinez-Arias	vmanuel.martinez@udea.edu.co	Conservacion Biologica utilizando Inteligencia Artificial, Programa 852	Minciencias-UdeA-ITM-IAVH	Colombia	Antioquia	Alejandria	EL POPO		6.39231	-75.109	Celular	Exacta	WGS84	1625	1625	2023	9	25	2023	10	12		AudioMoth 1.2.0	Plastic Tupper	G0089	built_in		Mono	192000		Medium - high (4/5)	Alkaline AA	32GB Sandisk Extreme	Buenas condiciones	Vegetación secundaria alta	1.7
Pasivo	A03		Victor M.	Martinez-Arias	vmanuel.martinez@udea.edu.co	Conservacion Biologica utilizando Inteligencia Artificial, Programa 852	Minciencias-UdeA-ITM-IAVH	Colombia	Antioquia	Alejandria	EL POPO		6.38864	-75.1091	Celular	Exacta	WGS84	1571	1571	2023	9	27	2023	10	10		AudioMoth 1.2.0	Plastic Tupper	G0061	built_in		Mono	192000		Medium - high (4/5)	Alkaline AA	32GB Sandisk Extreme	Buenas condiciones, Ligeramente húmeda por dentro	Borde entre pastos y riviera	1.7
Pasivo	A04		Victor M.	Martinez-Arias	vmanuel.martinez@udea.edu.co	Conservacion Biologica utilizando Inteligencia Artificial, Programa 852	Minciencias-UdeA-ITM-IAVH	Colombia	Antioquia	Alejandria	EL POPO		6.38507	-75.109	Celular	Exacta	WGS84	1664	1664	2023	9	28	2023	10	10		AudioMoth 1.2.0	Plastic Tupper	G0076	built_in		Mono	192000		Medium - high (4/5)	Alkaline AA	32GB Sandisk Extreme	Buenas condiciones	En borde de bosque, al lado de pastos	1.7
Pasivo	A05		Victor M.	Martinez-Arias	vmanuel.martinez@udea.edu.co	Conservacion Biologica utilizando Inteligencia Artificial, Programa 852	Minciencias-UdeA-ITM-IAVH	Colombia	Antioquia	Alejandria	EL POPO		6.3815	-75.1091	Celular	Exacta	WGS84	1713	1713	2023	9	27	2023	10	12		AudioMoth 1.2.0	Plastic Tupper	G0042	built_in		Mono	192000		Medium - high (4/5)	Alkaline AA	32GB Sandisk Extreme	Buenas condiciones, Ligeramente húmeda por dentro	En bosque, al lado de carretera	1.7
Pasivo	B01		Victor M.	Martinez-Arias	vmanuel.martinez@udea.edu.co	Conservacion Biologica utilizando Inteligencia Artificial, Programa 852	Minciencias-UdeA-ITM-IAVH	Colombia	Antioquia	Alejandria	EL POPO		6.39599	-75.1055	Celular	Exacta	WGS84	1514	1514	2023	9	25	2023	10	12		AudioMoth 1.2.0	Plastic Tupper	G0080	built_in		Mono	192000		Medium - high (4/5)	Alkaline AA	32GB Sandisk Extreme	Buenas condiciones	Vegetación secundaria alta	1.7
Pasivo	B02		Victor M.	Martinez-Arias	vmanuel.martinez@udea.edu.co	Conservacion Biologica utilizando Inteligencia Artificial, Programa 852	Minciencias-UdeA-ITM-IAVH	Colombia	Antioquia	Alejandria	EL POPO		6.39225	-75.1054	Celular	Exacta	WGS84	1602	1602	2023	9	25	2023	10	10		AudioMoth 1.0.0	Plastic Tupper	G0009	built_in		Mono	192000		Medium - high (4/5)	Alkaline AA	32GB Sandisk Extreme	Buenas condiciones, Ligeramente húmeda por dentro	Pastos	1.7
Pasivo	B03		Victor M.	Martinez-Arias	vmanuel.martinez@udea.edu.co	Conservacion Biologica utilizando Inteligencia Artificial, Programa 852	Minciencias-UdeA-ITM-IAVH	Colombia	Antioquia	Alejandria	EL POPO		6.38865	-75.1054	Celular	Exacta	WGS84	1576	1576	2023	9	27	2023	10	10		AudioMoth 1.2.0	Plastic Tupper	G0054	built_in		Mono	192000		Medium - high (4/5)	Alkaline AA	32GB Sandisk Extreme	Buenas condiciones	Pastos al lado de cañaduzal	1.7
Pasivo	B04		Victor M.	Martinez-Arias	vmanuel.martinez@udea.edu.co	Conservacion Biologica utilizando Inteligencia Artificial, Programa 852	Minciencias-UdeA-ITM-IAVH	Colombia	Antioquia	Alejandria	EL POPO		6.38509	-75.1054	Celular	Exacta	WGS84	1651	1651	2023	9	28	2023	10	10		NA	Plastic Tupper	G0101	built_in		Mono	192000		Medium - high (4/5)	Alkaline AA	32GB Sandisk Extreme	Caja inundada adentro	Cafetal	1.7
Pasivo	B05		Victor M.	Martinez-Arias	vmanuel.martinez@udea.edu.co	Conservacion Biologica utilizando Inteligencia Artificial, Programa 852	Minciencias-UdeA-ITM-IAVH	Colombia	Antioquia	Alejandria	EL POPO		6.3819	-75.106	Celular	Exacta	WGS84	1764	1764	2023	9	26	2023	10	10		AudioMoth 1.2.0	Plastic Tupper	G0077	built_in		Mono	192000		Medium - high (4/5)	Alkaline AA	32GB Sandisk Extreme	Ligeramente húmeda por dentro	Bosque secundario en regeneración en filo. Cerca a finca	1.7
Pasivo	B06		Victor M.	Martinez-Arias	vmanuel.martinez@udea.edu.co	Conservacion Biologica utilizando Inteligencia Artificial, Programa 852	Minciencias-UdeA-ITM-IAVH	Colombia	Antioquia	Alejandria	SAN MIGUEL		6.37781	-75.1054	Celular	Exacta	WGS84	1730	1730	2023	9	27	2023	10	12		AudioMoth 1.1.0	Plastic Tupper	G0020	built_in		Mono	192000		Medium - high (4/5)	Alkaline AA	32GB Sandisk Extreme	Ligeramente húmeda por dentro, Caja inundada adentro	Potrero con pastos altos	1.7
Pasivo	C01		Victor M.	Martinez-Arias	vmanuel.martinez@udea.edu.co	Conservacion Biologica utilizando Inteligencia Artificial, Programa 852	Minciencias-UdeA-ITM-IAVH	Colombia	Antioquia	Alejandria	EL POPO		6.39604	-75.102	Celular	Exacta	WGS84	1550	1550	2023	9	25	2023	10	12		AudioMoth 1.1.0	Plastic Tupper	G0024	built_in		Mono	192000		Medium - high (4/5)	Alkaline AA	32GB Sandisk Extreme	Buenas condiciones	En cima de montaña, en pequeño grupo de árboles rodeado de pastos y con pequeño humedal atrás de la grabadora.	1.7
Pasivo	C02		Victor M.	Martinez-Arias	vmanuel.martinez@udea.edu.co	Conservacion Biologica utilizando Inteligencia Artificial, Programa 852	Minciencias-UdeA-ITM-IAVH	Colombia	Antioquia	Alejandria	EL POPO		6.39242	-75.1023	Celular	Exacta	WGS84	1579	1579	2023	9	25	2023	10	10		AudioMoth 1.2.0	Plastic Tupper	G0055	built_in		Mono	192000		Medium - high (4/5)	Alkaline AA	32GB Sandisk Extreme	Buenas condiciones	Vegetación secundaria, en pendiente de 45 y cercana a quebrada	1.7
Pasivo	C03		Victor M.	Martinez-Arias	vmanuel.martinez@udea.edu.co	Conservacion Biologica utilizando Inteligencia Artificial, Programa 852	Minciencias-UdeA-ITM-IAVH	Colombia	Antioquia	Alejandria	EL POPO		6.38871	-75.1018	Celular	Exacta	WGS84	1616	1616	2023	9	25	2023	10	10		NA	Plastic Tupper	G0104	built_in		Mono	192000		Medium - high (4/5)	Alkaline AA	32GB Sandisk Extreme	Ligeramente húmeda por dentro	Pastos	1.7
Pasivo	C04		Victor M.	Martinez-Arias	vmanuel.martinez@udea.edu.co	Conservacion Biologica utilizando Inteligencia Artificial, Programa 852	Minciencias-UdeA-ITM-IAVH	Colombia	Antioquia	Alejandria	EL POPO		6.38504	-75.1018	Celular	Exacta	WGS84	1705	1705	2023	9	25	2023	10	10		AudioMoth 1.2.0	Plastic Tupper	G0091	built_in		Mono	192000		Medium - high (4/5)	Alkaline AA	32GB Sandisk Extreme	Buenas condiciones	Bosque al lado de un camino	1.7
Pasivo	C05		Victor M.	Martinez-Arias	vmanuel.martinez@udea.edu.co	Conservacion Biologica utilizando Inteligencia Artificial, Programa 852	Minciencias-UdeA-ITM-IAVH	Colombia	Antioquia	Alejandria	SAN MIGUEL		6.38136	-75.1018	Celular	Exacta	WGS84	1652	1652	2023	9	26	2023	10	11		AudioMoth 1.1.0	Plastic Tupper	G0025	built_in		Mono	192000		Medium - high (4/5)	Alkaline AA	32GB Sandisk Extreme	Caja inundada adentro	Sembrado de pasto para alimentar ganado. gallinas cerca, antropofonia	1.7
Pasivo	C06		Victor M.	Martinez-Arias	vmanuel.martinez@udea.edu.co	Conservacion Biologica utilizando Inteligencia Artificial, Programa 852	Minciencias-UdeA-ITM-IAVH	Colombia	Antioquia	Alejandria	SAN MIGUEL		6.37763	-75.1017	Celular	Exacta	WGS84	1725	1725	2023	9	26	2023	10	10		NA	Plastic Tupper	G0041	built_in		Mono	192000		Medium - high (4/5)	Alkaline AA	32GB Sandisk Extreme	Buenas condiciones, Ligeramente húmeda por dentro	Árbol en un potrero	1.7
Pasivo	C07		Victor M.	Martinez-Arias	vmanuel.martinez@udea.edu.co	Conservacion Biologica utilizando Inteligencia Artificial, Programa 852	Minciencias-UdeA-ITM-IAVH	Colombia	Antioquia	Alejandria	SAN LORENZO		6.37429	-75.1018	Celular	Exacta	WGS84	1769	1769	2023	9	27	2023	10	12		AudioMoth 1.0.0	Plastic Tupper	G0097	built_in		Mono	192000		Medium - high (4/5)	Alkaline AA	32GB Sandisk Extreme	Buenas condiciones	Pastos, a borde de bosque	1.7
Pasivo	D01		Victor M.	Martinez-Arias	vmanuel.martinez@udea.edu.co	Conservacion Biologica utilizando Inteligencia Artificial, Programa 852	Minciencias-UdeA-ITM-IAVH	Colombia	Antioquia	Alejandria	EL POPO		6.39604	-75.0981	Celular	Exacta	WGS84	1539	1539	2023	9	25	2023	10	12		AudioMoth 1.1.0	Plastic Tupper	G0023	built_in		Mono	192000		Medium - high (4/5)	Alkaline AA	32GB Sandisk Extreme	Buenas condiciones, Led en error [2 prendidos]	Rastrojo en zona de Pasto encabezado con árboles	1.7
Pasivo	D02		Victor M.	Martinez-Arias	vmanuel.martinez@udea.edu.co	Conservacion Biologica utilizando Inteligencia Artificial, Programa 852	Minciencias-UdeA-ITM-IAVH	Colombia	Antioquia	Alejandria	EL POPO		6.39229	-75.0984	Celular	Exacta	WGS84	1567	1567	2023	9	25	2023	10	10		AudioMoth 1.2.0	Plastic Tupper	G0067	built_in		Mono	192000		Medium - high (4/5)	Alkaline AA	32GB Sandisk Extreme	Buenas condiciones, Ligeramente húmeda por dentro	Bosque en ladera y cerca a quebrada	1.7
Pasivo	D03		Victor M.	Martinez-Arias	vmanuel.martinez@udea.edu.co	Conservacion Biologica utilizando Inteligencia Artificial, Programa 852	Minciencias-UdeA-ITM-IAVH	Colombia	Antioquia	Alejandria	SAN MIGUEL		6.38873	-75.0983	Celular	Exacta	WGS84	1581	1581	2023	9	27	2023	10	12		AudioMoth 1.2.0	Plastic Tupper	G0085	built_in		Mono	192000		Medium - high (4/5)	Alkaline AA	32GB Sandisk Extreme	Led en error [2 prendidos]	Pastos	1.7
Pasivo	D04		Victor M.	Martinez-Arias	vmanuel.martinez@udea.edu.co	Conservacion Biologica utilizando Inteligencia Artificial, Programa 852	Minciencias-UdeA-ITM-IAVH	Colombia	Antioquia	Alejandria	EL POPO		6.3852	-75.0983	Celular	Exacta	WGS84	1643	1643	2023	9	28	2023	10	12		AudioMoth 1.2.0	Plastic Tupper	G0032	built_in		Mono	192000		Medium - high (4/5)	Alkaline AA	32GB Sandisk Extreme	Buenas condiciones, Ligeramente húmeda por dentro	Bosque	1.7
Pasivo	D05		Victor M.	Martinez-Arias	vmanuel.martinez@udea.edu.co	Conservacion Biologica utilizando Inteligencia Artificial, Programa 852	Minciencias-UdeA-ITM-IAVH	Colombia	Antioquia	Alejandria	SAN MIGUEL		6.38156	-75.0982	Celular	Exacta	WGS84	1668	1668	2023	9	26	2023	10	11		AudioMoth 1.1.0	Plastic Tupper	G0021	built_in		Mono	192000		Medium - high (4/5)	Alkaline AA	32GB Sandisk Extreme	Ligeramente húmeda por dentro	Pastos y cultivo abandonado	1.7
Pasivo	D06		Victor M.	Martinez-Arias	vmanuel.martinez@udea.edu.co	Conservacion Biologica utilizando Inteligencia Artificial, Programa 852	Minciencias-UdeA-ITM-IAVH	Colombia	Antioquia	Alejandria	SAN MIGUEL		6.37802	-75.098	Celular	Exacta	WGS84	1732	1732	2023	9	26	2023	10	10		AudioMoth 1.1.0	Plastic Tupper	G0094	built_in		Mono	192000		Medium - high (4/5)	Alkaline AA	16GB Sandisk Extreme	Buenas condiciones, Led en error [2 prendidos]	Bosque conservado en filo	1.7
Pasivo	D07		Victor M.	Martinez-Arias	vmanuel.martinez@udea.edu.co	Conservacion Biologica utilizando Inteligencia Artificial, Programa 852	Minciencias-UdeA-ITM-IAVH	Colombia	Antioquia	Alejandria	SAN LORENZO		6.37431	-75.0982	Celular	Exacta	WGS84	1746	1746	2023	9	27	2023	10	12		NA	Plastic Tupper	G0100	built_in		Mono	192000		Medium - high (4/5)	Alkaline AA	32GB Sandisk Extreme	Buenas condiciones	Bosque cerca de carretera, muy pendiente	1.7
Pasivo	E01		Victor M.	Martinez-Arias	vmanuel.martinez@udea.edu.co	Conservacion Biologica utilizando Inteligencia Artificial, Programa 852	Minciencias-UdeA-ITM-IAVH	Colombia	Antioquia	Alejandria	EL POPO		6.39602	-75.0944	Celular	Exacta	WGS84	1465	1465	2023	9	25	2023	10	11		AudioMoth 1.1.0	Plastic Tupper	G0030	built_in		Mono	192000		Medium - high (4/5)	Alkaline AA	32GB Sandisk Extreme	Buenas condiciones, Ligeramente húmeda por dentro	Rastrojo alto con elementos de vegetación secundaria. Cercado al río Nare	1.7
Pasivo	E02		Victor M.	Martinez-Arias	vmanuel.martinez@udea.edu.co	Conservacion Biologica utilizando Inteligencia Artificial, Programa 852	Minciencias-UdeA-ITM-IAVH	Colombia	Antioquia	Alejandria	SAN MIGUEL		6.39235	-75.0946	Celular	Exacta	WGS84	1491	1491	2023	9	26	2023	10	11		AudioMoth 1.2.0	Plastic Tupper	G0064	built_in		Mono	192000		Medium - high (4/5)	Alkaline AA	32GB Sandisk Extreme	Buenas condiciones	Bosque galeria ripario	1.7
Pasivo	E03		Victor M.	Martinez-Arias	vmanuel.martinez@udea.edu.co	Conservacion Biologica utilizando Inteligencia Artificial, Programa 852	Minciencias-UdeA-ITM-IAVH	Colombia	Antioquia	Alejandria	SAN MIGUEL		6.38881	-75.0945	Celular	Exacta	WGS84	1643	1643	2023	9	26	2023	10	11		AudioMoth 1.2.0	Plastic Tupper	G0039	built_in		Mono	192000		Medium - high (4/5)	Alkaline AA	32GB Sandisk Extreme	Caja tumbada	Bosque fragmentado	1.7
Pasivo	E04		Victor M.	Martinez-Arias	vmanuel.martinez@udea.edu.co	Conservacion Biologica utilizando Inteligencia Artificial, Programa 852	Minciencias-UdeA-ITM-IAVH	Colombia	Antioquia	Alejandria	SAN MIGUEL		6.38516	-75.0945	Celular	Exacta	WGS84	1651	1651	2023	9	27	2023	10	11		AudioMoth 1.2.0	Plastic Tupper	G0082	built_in		Mono	192000		Medium - high (4/5)	Alkaline AA	32GB Sandisk Extreme	Buenas condiciones, Ligeramente húmeda por dentro	En cañón. En pastizal alto (>2m) al lado de cuerpo de agua y con bosque en la parte superior del cañón.	1.7
Pasivo	E05		Victor M.	Martinez-Arias	vmanuel.martinez@udea.edu.co	Conservacion Biologica utilizando Inteligencia Artificial, Programa 852	Minciencias-UdeA-ITM-IAVH	Colombia	Antioquia	Alejandria	SAN MIGUEL		6.38169	-75.0946	Celular	Exacta	WGS84	1683	1683	2023	9	26	2023	10	11		AudioMoth 1.2.0	Plastic Tupper	G0057	built_in		Mono	192000		Medium - high (4/5)	Alkaline AA	32GB Sandisk Extreme	Membrana rota, Caja inundada adentro	Pastos	1.7
Pasivo	E06		Victor M.	Martinez-Arias	vmanuel.martinez@udea.edu.co	Conservacion Biologica utilizando Inteligencia Artificial, Programa 852	Minciencias-UdeA-ITM-IAVH	Colombia	Antioquia	Alejandria	SAN MIGUEL		6.37791	-75.0944	Celular	Exacta	WGS84	1732	1732	2023	9	26	2023	10	10		AudioMoth 1.2.0	Plastic Tupper	G0033	built_in		Mono	192000		Medium - high (4/5)	Alkaline AA	32GB Sandisk Extreme	Buenas condiciones	Apuntando a barranco con vsa bosque, y guadua.	1.7
Pasivo	E07		Victor M.	Martinez-Arias	vmanuel.martinez@udea.edu.co	Conservacion Biologica utilizando Inteligencia Artificial, Programa 852	Minciencias-UdeA-ITM-IAVH	Colombia	Antioquia	Alejandria	SAN LORENZO		6.37425	-75.0946	Celular	Exacta	WGS84	1698	1698	2023	9	26	2023	10	10		AudioMoth 1.0.0	Plastic Tupper	G0002	built_in		Mono	192000		Medium - high (4/5)	Alkaline AA	32GB Sandisk Extreme	Buenas condiciones, Ligeramente húmeda por dentro	Vegetación secundaria alta, en barranco. presencia helechos arbóreos, laureles y melastomataceae	1.7
Pasivo	F02		Victor M.	Martinez-Arias	vmanuel.martinez@udea.edu.co	Conservacion Biologica utilizando Inteligencia Artificial, Programa 852	Minciencias-UdeA-ITM-IAVH	Colombia	Antioquia	Alejandria	SAN MIGUEL		6.39223	-75.091	Celular	Exacta	WGS84	1482	1482	2023	9	26	2023	10	11		AudioMoth 1.2.0	Plastic Tupper	G0086	built_in		Mono	192000		Medium - high (4/5)	Alkaline AA	32GB Sandisk Extreme	Buenas condiciones	Pastos	1.7
Pasivo	F03		Victor M.	Martinez-Arias	vmanuel.martinez@udea.edu.co	Conservacion Biologica utilizando Inteligencia Artificial, Programa 852	Minciencias-UdeA-ITM-IAVH	Colombia	Antioquia	Alejandria	SAN MIGUEL		6.38883	-75.091	Celular	Exacta	WGS84	1609	1609	2023	9	26	2023	10	11		AudioMoth 1.2.0	Plastic Tupper	G0078	built_in		Mono	192000		Medium - high (4/5)	Alkaline AA	16GB Sandisk Extreme	Buenas condiciones	Vegetación secundaria baja	1.7
Pasivo	F04		Victor M.	Martinez-Arias	vmanuel.martinez@udea.edu.co	Conservacion Biologica utilizando Inteligencia Artificial, Programa 852	Minciencias-UdeA-ITM-IAVH	Colombia	Antioquia	Alejandria	SAN MIGUEL		6.3851	-75.091	Celular	Exacta	WGS84	1659	1659	2023	9	26	2023	10	12		AudioMoth 1.2.0	Plastic Tupper	G0058	built_in		Mono	192000		Medium - high (4/5)	Alkaline AA	32GB Sandisk Extreme	Buenas condiciones	Bosque de galería o fragmentado	1.7
Pasivo	F05		Victor M.	Martinez-Arias	vmanuel.martinez@udea.edu.co	Conservacion Biologica utilizando Inteligencia Artificial, Programa 852	Minciencias-UdeA-ITM-IAVH	Colombia	Antioquia	Alejandria	SAN MIGUEL		6.38145	-75.091	Celular	Exacta	WGS84	1750	1750	2023	9	27	2023	10	11		AudioMoth 1.2.0	Plastic Tupper	G0075	built_in		Mono	192000		Medium - high (4/5)	Alkaline AA	32GB Sandisk Extreme	Buenas condiciones, Ligeramente húmeda por dentro	Pastos arbolados fruto de tala reciente	1.7
Pasivo	F06		Victor M.	Martinez-Arias	vmanuel.martinez@udea.edu.co	Conservacion Biologica utilizando Inteligencia Artificial, Programa 852	Minciencias-UdeA-ITM-IAVH	Colombia	Antioquia	Alejandria	SAN LORENZO		6.37791	-75.0908	Celular	Exacta	WGS84	1774	1774	2023	9	26	2023	10	11		NA	Plastic Tupper	G0031	built_in		Mono	192000		Medium - high (4/5)	Alkaline AA	32GB Sandisk Extreme	Buenas condiciones	Bosque de sucesión, en pendiente. tiene laureles y palmas	1.7
Pasivo	F07		Victor M.	Martinez-Arias	vmanuel.martinez@udea.edu.co	Conservacion Biologica utilizando Inteligencia Artificial, Programa 852	Minciencias-UdeA-ITM-IAVH	Colombia	Antioquia	Alejandria	SAN LORENZO		6.37435	-75.0909	Celular	Exacta	WGS84	1661	1661	2023	9	26	2023	10	11		AudioMoth 1.2.0	Plastic Tupper	G0063	built_in		Mono	192000		Medium - high (4/5)	Alkaline AA	32GB Sandisk Extreme	Buenas condiciones	Vegetación secundaria baja con vismia macrophylla, siete cueros, y nicuitos. Es un área en regeneración con pasos para ganado.	1.7
Pasivo	F08		Victor M.	Martinez-Arias	vmanuel.martinez@udea.edu.co	Conservacion Biologica utilizando Inteligencia Artificial, Programa 852	Minciencias-UdeA-ITM-IAVH	Colombia	Antioquia	Alejandria	SAN LORENZO		6.37069	-75.0908	Celular	Exacta	WGS84	1587	1587	2023	9	27	2023	10	12		AudioMoth 1.1.0	Plastic Tupper	G0017	built_in		Mono	192000		Medium - high (4/5)	Alkaline AA	32GB Sandisk Extreme	Buenas condiciones	Pastos sin vacas	1.7
Pasivo	G02		Victor M.	Martinez-Arias	vmanuel.martinez@udea.edu.co	Conservacion Biologica utilizando Inteligencia Artificial, Programa 852	Minciencias-UdeA-ITM-IAVH	Colombia	Antioquia	Alejandria	SAN MIGUEL		6.39239	-75.0874	Celular	Exacta	WGS84	1486	1486	2023	9	26	2023	10	11		AudioMoth 1.2.0	Plastic Tupper	G0068	built_in		Mono	192000		Medium - high (4/5)	Alkaline AA	32GB Sandisk Extreme	Buenas condiciones	Cultivos. mosaico de pastos y cultivos	1.7
Pasivo	G03		Victor M.	Martinez-Arias	vmanuel.martinez@udea.edu.co	Conservacion Biologica utilizando Inteligencia Artificial, Programa 852	Minciencias-UdeA-ITM-IAVH	Colombia	Antioquia	Alejandria	SAN MIGUEL		6.38872	-75.0873	Celular	Exacta	WGS84	1618	1618	2023	9	26	2023	10	11		AudioMoth 1.2.0	Plastic Tupper	G0102	built_in		Mono	192000		Medium - high (4/5)	Alkaline AA	32GB Sandisk Extreme	Buenas condiciones	Pastos enmalezado	1.7
Pasivo	G04		Victor M.	Martinez-Arias	vmanuel.martinez@udea.edu.co	Conservacion Biologica utilizando Inteligencia Artificial, Programa 852	Minciencias-UdeA-ITM-IAVH	Colombia	Antioquia	Alejandria	SAN MIGUEL		6.38514	-75.0873	Celular	Exacta	WGS84	1668	1668	2023	9	28	2023	10	11		AudioMoth 1.2.0	Plastic Tupper	G0090	built_in		Mono	192000		Medium - high (4/5)	Alkaline AA	32GB Sandisk Extreme	Buenas condiciones	Borde potrero y afluente de agua, cañada	1.7
Pasivo	G05		Victor M.	Martinez-Arias	vmanuel.martinez@udea.edu.co	Conservacion Biologica utilizando Inteligencia Artificial, Programa 852	Minciencias-UdeA-ITM-IAVH	Colombia	Antioquia	Alejandria	SAN MIGUEL		6.38149	-75.0873	Celular	Exacta	WGS84	1822	1822	2023	9	28	2023	10	11		AudioMoth 1.1.0	Plastic Tupper	G0026	built_in		Mono	192000		Medium - high (4/5)	Alkaline AA	32GB Sandisk Extreme	Buenas condiciones, Ligeramente húmeda por dentro	Pastos arbolados	1.7
Pasivo	G06		Victor M.	Martinez-Arias	vmanuel.martinez@udea.edu.co	Conservacion Biologica utilizando Inteligencia Artificial, Programa 852	Minciencias-UdeA-ITM-IAVH	Colombia	Antioquia	Alejandria	SAN LORENZO		6.37792	-75.0872	Celular	Exacta	WGS84	1786	1786	2023	9	26	2023	10	11		AudioMoth 1.2.0	Plastic Tupper	G0103	built_in		Mono	192000		Medium - high (4/5)	Alkaline AA	32GB Sandisk Extreme	Caja inundada adentro	Ubicado en bosque, con palma de corozo, ciatea, laureles, ficus, migüitos	1.7
Pasivo	G07		Victor M.	Martinez-Arias	vmanuel.martinez@udea.edu.co	Conservacion Biologica utilizando Inteligencia Artificial, Programa 852	Minciencias-UdeA-ITM-IAVH	Colombia	Antioquia	Alejandria	SAN LORENZO		6.37438	-75.0872	Celular	Exacta	WGS84	1634	1634	2023	9	26	2023	10	11		AudioMoth 1.2.0	Plastic Tupper	G0051	built_in		Mono	192000		Medium - high (4/5)	Alkaline AA	32GB Sandisk Extreme	Buenas condiciones, Ligeramente húmeda por dentro	Bosque joven con elementos de ripario. en pendiente de 30	1.7
Pasivo	G08		Victor M.	Martinez-Arias	vmanuel.martinez@udea.edu.co	Conservacion Biologica utilizando Inteligencia Artificial, Programa 852	Minciencias-UdeA-ITM-IAVH	Colombia	Antioquia	Alejandria	SAN LORENZO		6.37066	-75.0873	Celular	Exacta	WGS84	1518	1518	2023	9	27	2023	10	12		AudioMoth 1.2.0	Plastic Tupper	G0087	built_in		Mono	192000		Medium - high (4/5)	Alkaline AA	32GB Sandisk Extreme	Caja inundada adentro	Vegetación de galería secundaria	1.7
