# Supplementary material for: A workflow to optimize spatial sampling in ecoacoustic studies
Source: Research Square preprint supplement (doi:10.21203/rs.3.rs-7207339/v1), 2025-10-10
Supplement: Supplementary file 25 [file UDAS_AndeanUrban.xlsx]

## Sheet: Vocabulary
Variable	Class	Variable	Value	Units
1	Project	Method_PR	Pasivo	text
2	Project	field_number_PR	Nombre de carpeta con grabaciones	text
3	Project	voucher_PR	Aplica cuando es grabacion direccional	text
4	Project	collector_first_name_PR		text
5	Project	collector_last_name_PR		text
6	Project	collector_email_PR		text
7	Project	project_name_PR		text
8	Project	funding_PR	Entidad financiadora	text
9	Geographic Information	country_IG		text
10	Geographic Information	department_IG		text
11	Geographic Information	municipality_IG		text
12	Geographic Information	vereda_IG		text
13	Geographic Information	locality_IG		text
14	Geographic Information	latitude_IG	en decimales	numeric, decimal
15	Geographic Information	longitud_IG	en decimales	numeric, decimal
16	Geographic Information	coordinates_source_IG	e.g., GPS, Celular, GoogleEarth, etc	text
17	Geographic Information	precision_IG	en metros	numeric
18	Geographic Information	datum_IG	e.g., WGS84	numeric
19	Geographic Information	min_elevation_IG
20	Geographic Information	max_elevation_IG
21	Date information	year_int_TI	Año inicio	numeric
22	Date information	month_init_TI	Mes inicio	numeric
23	Date information	day_init_TI	Día inicio	numeric
24	Date information	year_end_TI	Año fin	numeric
25	Date information	month_end_TI	Mes fin	numeric
26	Date information	day_end_TI	Día fin	numeric
27	Date information	obs_TI	Observaciones fechas	numeric
28	Recorder	recorder_RE	marca grabadora	text
29	Recorder	rec_case_RE	carcasa de la grabadora (si aplica)	text
30	Recorder	rec_serial_RE	serial de la grabadora	alphanumeric
31	Recorder	microphone_RE		text
32	Recorder	mic_serial_RE		alphanumeric
33	Recorder	channels_RE	e.g., mono	text
34	Recorder	filters_RE		text
35	Recorder	gain_RE	ganancia en decibeles	numeric
36	Recorder	power_source_RE	Tipo de baterias o fuente de poder	text
37	Recorder	memory_card_RE	marca de la memoria	text
38	Recorder	obs_RE		text
39	Habitat	habitat_HA	basado en observacion in situ	text
40	Habitat	rec_height_HA	altura de despliegue de la grabadora	numeric
41	Habitat	season_HA	e.g., lluvia, seca, transicion	text
42	Habitat	climatic_data_HA	e.g., Temperatura, Humedad, etc.	text
43	Habitat	obs_HA		text
44	Landscape variables	Buffer_LV	Búffer de posición	numeric
45	Landscape variables	Cobdos_LV	Cobertura de dosel, obtenido de CANOPEO	numeric
46	Landscape variables	Perf_LV	Perfil de vegetación, obtenido de CANOPEO	numeric
47	Landscape variables	DC_LV	Distancia al centro del pozo	numeric
48	Landscape variables	DCO_LV	Distancia a construcciones o zona industrial comercial	numeric
49	Landscape variables	VS_LV	Distancia a vías	numeric
50	Landscape variables	DOS_LV	Altura del dosel, obtenido de Potapov et al. 2020	numeric
51	Landscape variables	AG_LV	Distancia a cuerpos de agua	numeric
52	Landscape variables	ZI_LV	Distancia a zonas inundables	numeric
53	Landscape variables	COV_LV	Cobertura dominante	text
54	Multimedia	Video_MM	Bajo evaluación
55	Multimedia	Image_MM

## Sheet: Template
Method_PR	field_number_PR	voucher_PR	collector_first_name_PR	collector_last_name_PR	collector_email_PR	project_name_PR	funding_PR	country_IG	department_IG	municipality_IG	vereda_IG	locality_IG	latitude_IG	longitud_IG	coordinates_source_IG	precision_IG	datum_IG	min_elevation_IG	max_elevation_IG	year_init_TI	month_init_TI	day_init_TI	year_end_TI	month_end_TI	day_end_TI	obs_TI	recorder_RE	rec_case_RE	rec_serial_RE	microphone_RE	mic_serial_RE	channels_RE	samp_rate_RE	filters_RE	gain_RE	power_source_RE	memory_card_RE	obs_RE	habitat_HA	rec_height_HA	season_HA	climatic_data_HA	obs_HA
Pasivo	LEA01		Carolina Paniagua, Victor Martínez, Juan M. Daza	Carolina Paniagua, Victor Martínez, Juan M. Daza	cpaniaguav@unal.edu.co	Conservacion Biologica utilizando Inteligencia Artificial, Programa 852	Minciencias-UdeA-ITM-IAVH	Colombia	Antioquia	La Estrella		Reserva Natural El Romeral	6.16308	-75.6794	Celular	Exacta	WGS84			2023	4	18	2023	5	3	Funcional	AudioMoth 1.2.0	Plastic Tupper	G0032	built_in		Mono	192000		Medium - high (4/5)	Alkaline AA	32GB Sandisk Extreme		Interior de bosque, reserva parte alta	1.5
Pasivo	LEA02		Carolina Paniagua, Victor Martínez, Juan M. Daza	Carolina Paniagua, Victor Martínez, Juan M. Daza	cpaniaguav@unal.edu.co	Conservacion Biologica utilizando Inteligencia Artificial, Programa 853	Minciencias-UdeA-ITM-IAVH	Colombia	Antioquia	La Estrella		Reserva Natural El Romeral	6.15295	-75.6739	Celular	Exacta	WGS84			2023	4	18	2023	5	3	Funcional	AudioMoth 1.1.0	Plastic Tupper	G0022	built_in		Mono	192000		Medium - high (4/5)	Alkaline AA	32GB Sandisk Extreme		En pinera en la reserva el romeral, cerca a derrumbe	1.5
Pasivo	LEA03		Carolina Paniagua, Victor Martínez, Juan M. Daza	Carolina Paniagua, Victor Martínez, Juan M. Daza	cpaniaguav@unal.edu.co	Conservacion Biologica utilizando Inteligencia Artificial, Programa 854	Minciencias-UdeA-ITM-IAVH	Colombia	Antioquia	La Estrella		Reserva Natural El Romeral	6.13668	-75.6779	Celular	Exacta	WGS84			2023	4	19	2023	5	4	Funcional	AudioMoth 1.2.0	Plastic Tupper	G0060	built_in		Mono	192000		Medium - high (4/5)	Alkaline AA	32GB Sandisk Extreme		En parte alta de reserva romeral. Hay muchos musgos	1.5
Pasivo	LEA04		Carolina Paniagua, Victor Martínez, Juan M. Daza	Carolina Paniagua, Victor Martínez, Juan M. Daza	cpaniaguav@unal.edu.co	Conservacion Biologica utilizando Inteligencia Artificial, Programa 855	Minciencias-UdeA-ITM-IAVH	Colombia	Antioquia	La Estrella		Reserva Natural El Romeral	6.1331	-75.6767	Celular	Exacta	WGS84			2023	4	19	2023	5	4	Funcional	AudioMoth 1.2.0	Plastic Tupper	G0042	built_in		Mono	192000		Medium - high (4/5)	Alkaline AA	32GB Sandisk Extreme		Parte alta Romeral, Caña brava, pastos altos, al lado de camino	1.5
Pasivo	LEA05		Carolina Paniagua, Victor Martínez, Juan M. Daza	Carolina Paniagua, Victor Martínez, Juan M. Daza	cpaniaguav@unal.edu.co	Conservacion Biologica utilizando Inteligencia Artificial, Programa 856	Minciencias-UdeA-ITM-IAVH	Colombia	Antioquia	La Estrella		Reserva Natural El Romeral	6.12995	-75.6748	Celular	Exacta	WGS84			2023	4	19	2023	5	4	Funcional	AudioMoth 1.1.0	Plastic Tupper	G0021	built_in		Mono	192000		Medium - high (4/5)	Alkaline AA	32GB Sandisk Extreme		Bosque en parte alta del romeral parte alta 2750 msnm, todo muy seco, cerca a invasión de caña brava	1.5
Pasivo	LEB01		Carolina Paniagua, Victor Martínez, Juan M. Daza	Carolina Paniagua, Victor Martínez, Juan M. Daza	cpaniaguav@unal.edu.co	Conservacion Biologica utilizando Inteligencia Artificial, Programa 857	Minciencias-UdeA-ITM-IAVH	Colombia	Antioquia	La Estrella		Reserva Natural El Romeral	6.15709	-75.6704	Celular	Exacta	WGS84			2023	4	18	2023	5	3	Funcional	AudioMoth 1.1.0	Plastic Tupper	G0034	built_in		Mono	192000		Medium - high (4/5)	Alkaline AA	32GB Sandisk Extreme		Bosque reserva, cerca hay pastizal (lugar abierto)	1.5
Pasivo	LEB02		Carolina Paniagua, Victor Martínez, Juan M. Daza	Carolina Paniagua, Victor Martínez, Juan M. Daza	cpaniaguav@unal.edu.co	Conservacion Biologica utilizando Inteligencia Artificial, Programa 858	Minciencias-UdeA-ITM-IAVH	Colombia	Antioquia	La Estrella		Reserva Natural El Romeral	6.14577	-75.6702	Celular	Exacta	WGS84			2023	4	19	2023	5	4	Funcional	AudioMoth 1.2.0	Plastic Tupper	G0077	built_in		Mono	192000		Medium - high (4/5)	Alkaline AA	32GB Sandisk Extreme		Bosque montano, adyacente a camino y de espaldas a barranco	1.5
Pasivo	LEB03		Carolina Paniagua, Victor Martínez, Juan M. Daza	Carolina Paniagua, Victor Martínez, Juan M. Daza	cpaniaguav@unal.edu.co	Conservacion Biologica utilizando Inteligencia Artificial, Programa 859	Minciencias-UdeA-ITM-IAVH	Colombia	Antioquia	La Estrella		Reserva Natural El Romeral	6.13249	-75.6691	Celular	Exacta	WGS84			2023	4	19	2023	5	4	Funcional	AudioMoth 1.2.0	Plastic Tupper	G0059	built_in		Mono	192000		Medium - high (4/5)	Alkaline AA	32GB Sandisk Extreme		Matorral al rededor de Laguna	1.5
Pasivo	LEB04		Carolina Paniagua, Victor Martínez, Juan M. Daza	Carolina Paniagua, Victor Martínez, Juan M. Daza	cpaniaguav@unal.edu.co	Conservacion Biologica utilizando Inteligencia Artificial, Programa 860	Minciencias-UdeA-ITM-IAVH	Colombia	Antioquia	La Estrella		Reserva Natural El Romeral	6.12686	-75.6671	Celular	Exacta	WGS84			2023	4	19	2023	5	3	Grabadora con humedad	AudioMoth 1.1.0	Plastic Tupper	G0017	built_in		Mono	192000		Medium - high (4/5)	Alkaline AA	32GB Sandisk Extreme		Bosque altoandino. cerca a trocha	1.5
Pasivo	LEC01		Carolina Paniagua, Victor Martínez, Juan M. Daza	Carolina Paniagua, Victor Martínez, Juan M. Daza	cpaniaguav@unal.edu.co	Conservacion Biologica utilizando Inteligencia Artificial, Programa 861	Minciencias-UdeA-ITM-IAVH	Colombia	Antioquia	La Estrella		Reserva Natural El Romeral	6.16519	-75.6708	Celular	Exacta	WGS84			2023	4	18	2023	5	3	Grabadora con mucha humedad	AudioMoth 1.2.0	Plastic Tupper	G0044	built_in		Mono	192000		Medium - high (4/5)	Alkaline AA	32GB Sandisk Extreme		Reserva romeral, Bosque no muy denso, poco dosel	1.5
Pasivo	LEC02		Carolina Paniagua, Victor Martínez, Juan M. Daza	Carolina Paniagua, Victor Martínez, Juan M. Daza	cpaniaguav@unal.edu.co	Conservacion Biologica utilizando Inteligencia Artificial, Programa 862	Minciencias-UdeA-ITM-IAVH	Colombia	Antioquia	La Estrella		Reserva Natural El Romeral	6.15515	-75.6628	Celular	Exacta	WGS84			2023	4	18	2023	5	3	Funcional	AudioMoth 1.2.0	Plastic Tupper	G0033	built_in		Mono	192000		Medium - high (4/5)	Alkaline AA	32GB Sandisk Extreme		Bosque borde rural, cerca a quebrada	1.5
Pasivo	LEC03		Carolina Paniagua, Victor Martínez, Juan M. Daza	Carolina Paniagua, Victor Martínez, Juan M. Daza	cpaniaguav@unal.edu.co	Conservacion Biologica utilizando Inteligencia Artificial, Programa 863	Minciencias-UdeA-ITM-IAVH	Colombia	Antioquia	La Estrella		Reserva Natural El Romeral	6.14951	-75.6665	Celular	Exacta	WGS84			2023	4	19	2023	5	4	Funcional	AudioMoth 1.2.0	Plastic Tupper	G0071	built_in		Mono	192000		Medium - high (4/5)	Alkaline AA	32GB Sandisk Extreme		En área de helechos, cercano al camino. hay Coníferas, y es en filo. Sonidos de disparos de la escuela de policía. 100 m dentro del camino	1.5
Pasivo	LEC04		Carolina Paniagua, Victor Martínez, Juan M. Daza	Carolina Paniagua, Victor Martínez, Juan M. Daza	cpaniaguav@unal.edu.co	Conservacion Biologica utilizando Inteligencia Artificial, Programa 864	Minciencias-UdeA-ITM-IAVH	Colombia	Antioquia	La Estrella		Reserva Natural El Romeral	6.13927	-75.665	Celular	Exacta	WGS84			2023	4	19				ROBADA	AudioMoth 1.0.0	Plastic Tupper	G0007	built_in		Mono	192000		Medium - high (4/5)	Alkaline AA	32GB Sandisk Extreme		En vegetación secundaria, mirándo aparte baja de barranco. cercano a carretera.	1.5
Pasivo	LEC05		Carolina Paniagua, Victor Martínez, Juan M. Daza	Carolina Paniagua, Victor Martínez, Juan M. Daza	cpaniaguav@unal.edu.co	Conservacion Biologica utilizando Inteligencia Artificial, Programa 865	Minciencias-UdeA-ITM-IAVH	Colombia	Antioquia	La Estrella		Reserva Natural El Romeral	6.13132	-75.6619	Celular	Exacta	WGS84			2023	4	19	2023	5	3	Funcional	AudioMoth 1.2.0	Plastic Tupper	G0073	built_in		Mono	192000		Medium - high (4/5)	Alkaline AA	32GB Sandisk Extreme		Detrás de casa de predio rural, entre potreros	1.5
Pasivo	LEC06		Carolina Paniagua, Victor Martínez, Juan M. Daza	Carolina Paniagua, Victor Martínez, Juan M. Daza	cpaniaguav@unal.edu.co	Conservacion Biologica utilizando Inteligencia Artificial, Programa 866	Minciencias-UdeA-ITM-IAVH	Colombia	Antioquia	La Estrella		Reserva Natural El Romeral	6.11947	-75.6668	Celular	Exacta	WGS84			2023	4	19	2023	5	3	Funcional	AudioMoth 1.2.0	Plastic Tupper	G0055	built_in		Mono	192000		Medium - high (4/5)	Alkaline AA	32GB Sandisk Extreme		bosque altoandino cinco metros de distancia de la trocha	1.5
Pasivo	LEC07		Carolina Paniagua, Victor Martínez, Juan M. Daza	Carolina Paniagua, Victor Martínez, Juan M. Daza	cpaniaguav@unal.edu.co	Conservacion Biologica utilizando Inteligencia Artificial, Programa 867	Minciencias-UdeA-ITM-IAVH	Colombia	Antioquia	La Estrella		Reserva Natural El Romeral	6.11514	-75.6649	Celular	Exacta	WGS84			2023	4	19	2023	5	3	Funcional	AudioMoth 1.1.0	Plastic Tupper	G0024	built_in		Mono	192000		Medium - high (4/5)	Alkaline AA	32GB Sandisk Extreme		bosque altoandino a 10 metros de la trocha	1.5
Pasivo	LED01		Carolina Paniagua, Victor Martínez, Juan M. Daza	Carolina Paniagua, Victor Martínez, Juan M. Daza	cpaniaguav@unal.edu.co	Conservacion Biologica utilizando Inteligencia Artificial, Programa 868	Minciencias-UdeA-ITM-IAVH	Colombia	Antioquia	La Estrella		Reserva Natural El Romeral parte baja	6.15894	-75.6636	Celular	Exacta	WGS84			2023	4	18	2023	5	3	Funcional	AudioMoth 1.2.0	Plastic Tupper	G0047	built_in		Mono	192000		Medium - high (4/5)	Alkaline AA	32GB Sandisk Extreme		Bosque romeral reserva parte baja	1.5
Pasivo	LED02		Carolina Paniagua, Victor Martínez, Juan M. Daza	Carolina Paniagua, Victor Martínez, Juan M. Daza	cpaniaguav@unal.edu.co	Conservacion Biologica utilizando Inteligencia Artificial, Programa 869	Minciencias-UdeA-ITM-IAVH	Colombia	Antioquia	La Estrella		Reserva Natural El Romeral parte baja	6.13698	-75.6592	Celular	Exacta	WGS84			2023	4	19	2023	5	3	Funcional	AudioMoth 1.0.0	Plastic Tupper	G0009	built_in		Mono	192000		Medium - high (4/5)	Alkaline AA	32GB Sandisk Extreme		En área con plántulas adyacentes, en zona de pastizal, cercana a áreas de bosque.	1.5
Pasivo	LED03		Carolina Paniagua, Victor Martínez, Juan M. Daza	Carolina Paniagua, Victor Martínez, Juan M. Daza	cpaniaguav@unal.edu.co	Conservacion Biologica utilizando Inteligencia Artificial, Programa 870	Minciencias-UdeA-ITM-IAVH	Colombia	Antioquia	La Estrella		Zona Rural	6.13811	-75.6512	Celular	Exacta	WGS84			2023	4	17	2023	5	3	Funcional	AudioMoth 1.2.0	Plastic Tupper	G0039	built_in		Mono	192000		Medium - high (4/5)	Alkaline AA	32GB Sandisk Extreme		En zona recién cortada. Muy perturbado, en modo reciente. alrededor de cipreses	1.5
Pasivo	LED05		Carolina Paniagua, Victor Martínez, Juan M. Daza	Carolina Paniagua, Victor Martínez, Juan M. Daza	cpaniaguav@unal.edu.co	Conservacion Biologica utilizando Inteligencia Artificial, Programa 871	Minciencias-UdeA-ITM-IAVH	Colombia	Antioquia	La Estrella		Zona Rural	6.11646	-75.6504	Celular	Exacta	WGS84			2023	4	18	2023	5	3	Grabadora con humedad	AudioMoth 1.2.0	Plastic Tupper	G0058	built_in		Mono	192000		Medium - high (4/5)	Alkaline AA	32GB Sandisk Extreme		En borde de bosque, parte baja reserva El Romeral, rieles con poco tránsito de transporte y personas	1.5
Pasivo	LEE02		Carolina Paniagua, Victor Martínez, Juan M. Daza	Carolina Paniagua, Victor Martínez, Juan M. Daza	cpaniaguav@unal.edu.co	Conservacion Biologica utilizando Inteligencia Artificial, Programa 872	Minciencias-UdeA-ITM-IAVH	Colombia	Antioquia	La Estrella		Zona Rural	6.16365	-75.6617	Celular	Exacta	WGS84			2023	4	18	2023	5	3	Funcional	AudioMoth 1.1.0	Plastic Tupper	G0026	built_in		Mono	192000		Medium - high (4/5)	Alkaline AA	32GB Sandisk Extreme		En retiro de quebrada con vegetación secundaria, al lado de paso de acueducto, se escucha agua cayendo	1.5
Pasivo	LEE03		Carolina Paniagua, Victor Martínez, Juan M. Daza	Carolina Paniagua, Victor Martínez, Juan M. Daza	cpaniaguav@unal.edu.co	Conservacion Biologica utilizando Inteligencia Artificial, Programa 873	Minciencias-UdeA-ITM-IAVH	Colombia	Antioquia	La Estrella		Zona Rural	6.15806	-75.655	Celular	Exacta	WGS84			2023	4	18	2023	5	3	Funcional	AudioMoth 1.2.0	Plastic Tupper	G0054	built_in		Mono	192000		Medium - high (4/5)	Alkaline AA	32GB Sandisk Extreme		Guadual rodeado de pastos en zona rural	1.5
Pasivo	LEE04		Carolina Paniagua, Victor Martínez, Juan M. Daza	Carolina Paniagua, Victor Martínez, Juan M. Daza	cpaniaguav@unal.edu.co	Conservacion Biologica utilizando Inteligencia Artificial, Programa 874	Minciencias-UdeA-ITM-IAVH	Colombia	Antioquia	La Estrella		Reserva Natural El Romeral parte baja	6.15473	-75.6588	Celular	Exacta	WGS84			2023	4	18	2023	5	3	Funcional	AudioMoth 1.1.0	Plastic Tupper	G0023	built_in		Mono	192000		Medium - high (4/5)	Alkaline AA	16GB Sandisk Extreme		Bosque a borde de sendero peatonal	1.5
Pasivo	LEE05		Carolina Paniagua, Victor Martínez, Juan M. Daza	Carolina Paniagua, Victor Martínez, Juan M. Daza	cpaniaguav@unal.edu.co	Conservacion Biologica utilizando Inteligencia Artificial, Programa 875	Minciencias-UdeA-ITM-IAVH	Colombia	Antioquia	La Estrella		Zona Rural	6.15014	-75.6547	Celular	Exacta	WGS84			2023	4	20	2023	5	3	Grabadora mojada	AudioMoth 1.0.0	Plastic Tupper	G0005	built_in		Mono	192000		Medium - high (4/5)	Alkaline AA	32GB Sandisk Extreme		Zona verde de finca peri urbana, cerca a plantación	1.5
Pasivo	LEE06		Carolina Paniagua, Victor Martínez, Juan M. Daza	Carolina Paniagua, Victor Martínez, Juan M. Daza	cpaniaguav@unal.edu.co	Conservacion Biologica utilizando Inteligencia Artificial, Programa 925	Minciencias-UdeA-ITM-IAVH	Colombia	Antioquia	La Estrella		Reserva Natural El Romeral parte baja	6.1414	-75.6556	Celular	Exacta	WGS84			2023	4	19	2023	5	3	Funcional	AudioMoth 1.2.0	Plastic Tupper	G0081	built_in		Mono	192000		Medium - high (4/5)	Alkaline AA	32GB Sandisk Extreme		Bosque, borde de carretera cerca a pinera	1.5
Pasivo	LEF01		Carolina Paniagua, Victor Martínez, Juan M. Daza	Carolina Paniagua, Victor Martínez, Juan M. Daza	cpaniaguav@unal.edu.co	Conservacion Biologica utilizando Inteligencia Artificial, Programa 876	Minciencias-UdeA-ITM-IAVH	Colombia	Antioquia	La Estrella		Zona Rural	6.16598	-75.651	Celular	Exacta	WGS84			2023	4	18	2023	5	3	Funcional	AudioMoth 1.2.0	Plastic Tupper	G0078	built_in		Mono	192000		Medium - high (4/5)	Alkaline AA	32GB Sandisk Extreme		Arbol en zona semi urbana, al pie de vía.	1.5
Pasivo	LEF02		Carolina Paniagua, Victor Martínez, Juan M. Daza	Carolina Paniagua, Victor Martínez, Juan M. Daza	cpaniaguav@unal.edu.co	Conservacion Biologica utilizando Inteligencia Artificial, Programa 877	Minciencias-UdeA-ITM-IAVH	Colombia	Antioquia	La Estrella		Zona urbana, limte con zona rural	6.15671	-75.6476	Celular	Exacta	WGS84			2023	4	19	2023	5	3	Funcional	AudioMoth 1.2.0	Plastic Tupper	G0048	built_in		Mono	192000		Medium - high (4/5)	Alkaline AA	32GB Sandisk Extreme		Corredor de árboles finalizando zona urbana	1.5
Pasivo	LEF03		Carolina Paniagua, Victor Martínez, Juan M. Daza	Carolina Paniagua, Victor Martínez, Juan M. Daza	cpaniaguav@unal.edu.co	Conservacion Biologica utilizando Inteligencia Artificial, Programa 878	Minciencias-UdeA-ITM-IAVH	Colombia	Antioquia	La Estrella		Zona Urbana	6.15166	-75.6456	Celular	Exacta	WGS84			2023	4	18	2023	5	3	Funcional	AudioMoth 1.2.0	Plastic Tupper	G0053	built_in		Mono	192000		Medium - high (4/5)	Alkaline AA	32GB Sandisk Extreme		Al lado de quebrada (La Grande) en zona urbana, corredor de árboles por quebrada	1.5
Pasivo	LEF04		Carolina Paniagua, Victor Martínez, Juan M. Daza	Carolina Paniagua, Victor Martínez, Juan M. Daza	cpaniaguav@unal.edu.co	Conservacion Biologica utilizando Inteligencia Artificial, Programa 879	Minciencias-UdeA-ITM-IAVH	Colombia	Antioquia	La Estrella		Zona Rural	6.1443	-75.6466	Celular	Exacta	WGS84			2023	4	19	2023	5	3	Funcional	AudioMoth 1.2.0	Plastic Tupper	G0049	built_in		Mono	192000		Medium - high (4/5)	Alkaline AA	32GB Sandisk Extreme		Grabadora ubicada en árbol en pastizal alto borde de quebrada, cerca a corredor de bosque	1.5
Pasivo	LEF05		Carolina Paniagua, Victor Martínez, Juan M. Daza	Carolina Paniagua, Victor Martínez, Juan M. Daza	cpaniaguav@unal.edu.co	Conservacion Biologica utilizando Inteligencia Artificial, Programa 880	Minciencias-UdeA-ITM-IAVH	Colombia	Antioquia	La Estrella		Zona Rural	6.13572	-75.6466	Celular	Exacta	WGS84			2023	4	17	2023	5	3	Funcional	AudioMoth 1.2.0	Plastic Tupper	G0075	built_in		Mono	192000		Medium - high (4/5)	Alkaline AA	32GB Sandisk Extreme		Bosque secundario, rastrojo al lado de camino, cerca a quebrada la Bermejala. hay chagualos	1.5
Pasivo	LEF06		Carolina Paniagua, Victor Martínez, Juan M. Daza	Carolina Paniagua, Victor Martínez, Juan M. Daza	cpaniaguav@unal.edu.co	Conservacion Biologica utilizando Inteligencia Artificial, Programa 881	Minciencias-UdeA-ITM-IAVH	Colombia	Antioquia	La Estrella		Zona Rural, cerca a vía principal	6.12684	-75.6401	Celular	Exacta	WGS84			2023	4	18				ROBADA	AudioMoth 1.2.0	Plastic Tupper	G0069	built_in		Mono	192000		Medium - high (4/5)	Alkaline AA	32GB Sandisk Extreme		Arboles a borde de rieles, entre pastos amplios	1.5
Pasivo	LEF07		Carolina Paniagua, Victor Martínez, Juan M. Daza	Carolina Paniagua, Victor Martínez, Juan M. Daza	cpaniaguav@unal.edu.co	Conservacion Biologica utilizando Inteligencia Artificial, Programa 882	Minciencias-UdeA-ITM-IAVH	Colombia	Antioquia	La Estrella		Reserva Natural El Romeral parte baja	6.1226	-75.6527	Celular	Exacta	WGS84			2023	4	18	2023	5	3	Funcional	AudioMoth 1.2.0	Plastic Tupper	G0057	built_in		Mono	192000		Medium - high (4/5)	Alkaline AA	32GB Sandisk Extreme		Bosque sucesional, dentro de parcelacion, mas o menos a 50 m hay casa. Murmullo de quebrada	1.5
Pasivo	LEG01		Carolina Paniagua, Victor Martínez, Juan M. Daza	Carolina Paniagua, Victor Martínez, Juan M. Daza	cpaniaguav@unal.edu.co	Conservacion Biologica utilizando Inteligencia Artificial, Programa 883	Minciencias-UdeA-ITM-IAVH	Colombia	Antioquia	La Estrella		Zona Urbana	6.1624	-75.6443	Celular	Exacta	WGS84			2023	4	18	2023	5	3	Funcional	AudioMoth 1.0.0	Plastic Tupper	G0013	built_in		Mono	192000		Medium - high (4/5)	Alkaline AA	16GB Sandisk Extreme		Jardín de casa en zona urbana, al lado hay una construcción (horario de oficina)	1.5
Pasivo	LEG02		Carolina Paniagua, Victor Martínez, Juan M. Daza	Carolina Paniagua, Victor Martínez, Juan M. Daza	cpaniaguav@unal.edu.co	Conservacion Biologica utilizando Inteligencia Artificial, Programa 884	Minciencias-UdeA-ITM-IAVH	Colombia	Antioquia	La Estrella		Zona Urbana	6.15915	-75.645	Celular	Exacta	WGS84			2023	4	18	2023	5	3	Funcional	AudioMoth 1.1.0	Plastic Tupper	G0096	built_in		Mono	192000		Medium - high (4/5)	Alkaline AA	32GB Sandisk Extreme		Zona ver de colegio. jardín urbano, mirando al sur, al lado de vía	1.5
Pasivo	LEH01		Carolina Paniagua, Victor Martínez, Juan M. Daza	Carolina Paniagua, Victor Martínez, Juan M. Daza	cpaniaguav@unal.edu.co	Conservacion Biologica utilizando Inteligencia Artificial, Programa 885	Minciencias-UdeA-ITM-IAVH	Colombia	Antioquia	La Estrella		Zona Urbana	6.16363	-75.64	Celular	Exacta	WGS84			2023	4	18	2023	5	3	Funcional	AudioMoth 1.2.0	Plastic Tupper	G0085	built_in		Mono	192000		Medium - high (4/5)	Alkaline AA	32GB Sandisk Extreme		Retiro de quebrada La Ospina (Costa Azul). zona urbana, al lado de construcción, en poste de luz	1.5
Pasivo	LEH02		Carolina Paniagua, Victor Martínez, Juan M. Daza	Carolina Paniagua, Victor Martínez, Juan M. Daza	cpaniaguav@unal.edu.co	Conservacion Biologica utilizando Inteligencia Artificial, Programa 886	Minciencias-UdeA-ITM-IAVH	Colombia	Antioquia	La Estrella		Zona Urbana	6.15748	-75.6403	Celular	Exacta	WGS84			2023	4	18	2023	5	3	Funcional	AudioMoth 1.2.0	Plastic Tupper	G0035	built_in		Mono	192000		Medium - high (4/5)	Alkaline AA	32GB Sandisk Extreme		En jardín de casa en zona urbana, se escucha quebrada	1.5
Pasivo	LEH03		Carolina Paniagua, Victor Martínez, Juan M. Daza	Carolina Paniagua, Victor Martínez, Juan M. Daza	cpaniaguav@unal.edu.co	Conservacion Biologica utilizando Inteligencia Artificial, Programa 887	Minciencias-UdeA-ITM-IAVH	Colombia	Antioquia	La Estrella		Zona Urbana	6.15274	-75.6414	Celular	Exacta	WGS84			2023	4	18	2023	5	3	Funcional	AudioMoth 1.2.0	Plastic Tupper	G0086	built_in		Mono	192000		Medium - high (4/5)	Alkaline AA	32GB Sandisk Extreme		Dentro de unidad residencial urbana, sonido de quebrada	1.5
Pasivo	LEH04		Carolina Paniagua, Victor Martínez, Juan M. Daza	Carolina Paniagua, Victor Martínez, Juan M. Daza	cpaniaguav@unal.edu.co	Conservacion Biologica utilizando Inteligencia Artificial, Programa 888	Minciencias-UdeA-ITM-IAVH	Colombia	Antioquia	La Estrella		Zona Urbana	6.14945	-75.6384	Celular	Exacta	WGS84			2023	4	18	2023	5	3	Funcional	AudioMoth 1.2.0	Plastic Tupper	G0089	built_in		Mono	192000		Medium - high (4/5)	Alkaline AA	32GB Sandisk Extreme		Corredor de quebrada	1.5
Pasivo	LEH05		Carolina Paniagua, Victor Martínez, Juan M. Daza	Carolina Paniagua, Victor Martínez, Juan M. Daza	cpaniaguav@unal.edu.co	Conservacion Biologica utilizando Inteligencia Artificial, Programa 889	Minciencias-UdeA-ITM-IAVH	Colombia	Antioquia	La Estrella		Zona Rural	6.14343	-75.6405	Celular	Exacta	WGS84			2023	4	19	2023	5	3	Funcional	AudioMoth 1.2.0	Plastic Tupper	G0061	built_in		Mono	192000		Medium - high (4/5)	Alkaline AA	32GB Sandisk Extreme		corredor de árboles borde vía, zona semi urbana	1.5
Pasivo	LEH06		Carolina Paniagua, Victor Martínez, Juan M. Daza	Carolina Paniagua, Victor Martínez, Juan M. Daza	cpaniaguav@unal.edu.co	Conservacion Biologica utilizando Inteligencia Artificial, Programa 890	Minciencias-UdeA-ITM-IAVH	Colombia	Antioquia	La Estrella		Zona Urbana	6.13669	-75.6418	Celular	Exacta	WGS84			2023	4	17	2023	5	3	Funcional	AudioMoth 1.1.0	Plastic Tupper	G0019	built_in		Mono	192000		Medium - high (4/5)	Alkaline AA	32GB Sandisk Extreme		Pequeño bosque urbano, originalmente transformado de cafetal.	1.5
Pasivo	LEH07		Carolina Paniagua, Victor Martínez, Juan M. Daza	Carolina Paniagua, Victor Martínez, Juan M. Daza	cpaniaguav@unal.edu.co	Conservacion Biologica utilizando Inteligencia Artificial, Programa 891	Minciencias-UdeA-ITM-IAVH	Colombia	Antioquia	La Estrella		Zona Rural	6.13129	-75.6418	Celular	Exacta	WGS84			2023	4	17	2023	5	3	Funcional	AudioMoth 1.2.0	Plastic Tupper	G0074	built_in		Mono	192000		Medium - high (4/5)	Alkaline AA	32GB Sandisk Extreme		Bosque secundario sucesional, se escuchan gallinas al fondo	1.5
Pasivo	LEH09		Carolina Paniagua, Victor Martínez, Juan M. Daza	Carolina Paniagua, Victor Martínez, Juan M. Daza	cpaniaguav@unal.edu.co	Conservacion Biologica utilizando Inteligencia Artificial, Programa 892	Minciencias-UdeA-ITM-IAVH	Colombia	Antioquia	La Estrella		Zona Rural	6.12	-75.6436	Celular	Exacta	WGS84			2023	4	18	2023	5	3	Funcional	AudioMoth 1.2.0	Plastic Tupper	G0084	built_in		Mono	192000		Medium - high (4/5)	Alkaline AA	32GB Sandisk Extreme		árbol con caseríos alrededor.	1.5
Pasivo	LEH10		Carolina Paniagua, Victor Martínez, Juan M. Daza	Carolina Paniagua, Victor Martínez, Juan M. Daza	cpaniaguav@unal.edu.co	Conservacion Biologica utilizando Inteligencia Artificial, Programa 893	Minciencias-UdeA-ITM-IAVH	Colombia	Antioquia	La Estrella		Zona Rural	6.11515	-75.6466	Celular	Exacta	WGS84			2023	4	18	2023	5	3	Funcional	AudioMoth 1.2.0	Plastic Tupper	G0088	built_in		Mono	192000		Medium - high (4/5)	Alkaline AA	32GB Sandisk Extreme		En borde de bosque, parte trasera de una finca. Posibles sonidos antrópicos alrededor	1.5
Pasivo	LEI01		Carolina Paniagua, Victor Martínez, Juan M. Daza	Carolina Paniagua, Victor Martínez, Juan M. Daza	cpaniaguav@unal.edu.co	Conservacion Biologica utilizando Inteligencia Artificial, Programa 894	Minciencias-UdeA-ITM-IAVH	Colombia	Antioquia	La Estrella		Zona Urbana	6.15727	-75.6357	Celular	Exacta	WGS84			2023	4	18	2023	5	3	Funcional	AudioMoth 1.2.0	Plastic Tupper	G0068	built_in		Mono	192000		Medium - high (4/5)	Alkaline AA	32GB Sandisk Extreme		Al lado de vía principal	1.5
Pasivo	LEI02		Carolina Paniagua, Victor Martínez, Juan M. Daza	Carolina Paniagua, Victor Martínez, Juan M. Daza	cpaniaguav@unal.edu.co	Conservacion Biologica utilizando Inteligencia Artificial, Programa 895	Minciencias-UdeA-ITM-IAVH	Colombia	Antioquia	La Estrella		Zona Urbana	6.13355	-75.6369	Celular	Exacta	WGS84			2023	4	18	2023	5	3	Funcional	AudioMoth 1.2.0	Plastic Tupper	G0066	built_in		Mono	192000		Medium - high (4/5)	Alkaline AA	32GB Sandisk Extreme		En jardín infantil, cercano a quebrada	1.5
Pasivo	LEI03		Carolina Paniagua, Victor Martínez, Juan M. Daza	Carolina Paniagua, Victor Martínez, Juan M. Daza	cpaniaguav@unal.edu.co	Conservacion Biologica utilizando Inteligencia Artificial, Programa 896	Minciencias-UdeA-ITM-IAVH	Colombia	Antioquia	La Estrella		Zona Rural	6.128	-75.6393	Celular	Exacta	WGS84			2023	4	18	2023	5	3	Funcional	AudioMoth 1.2.0	Plastic Tupper	G0076	built_in		Mono	192000		Medium - high (4/5)	Alkaline AA	32GB Sandisk Extreme		Matorral, con casas a 70m aproximadamente	1.5
Pasivo	LEI04		Carolina Paniagua, Victor Martínez, Juan M. Daza	Carolina Paniagua, Victor Martínez, Juan M. Daza	cpaniaguav@unal.edu.co	Conservacion Biologica utilizando Inteligencia Artificial, Programa 897	Minciencias-UdeA-ITM-IAVH	Colombia	Antioquia	La Estrella		Zona Rural	6.12317	-75.6396	Celular	Exacta	WGS84			2023	4	18	2023	5	3	Funcional	AudioMoth 1.2.0	Plastic Tupper	G0080	built_in		Mono	192000		Medium - high (4/5)	Alkaline AA	32GB Sandisk Extreme		Borde de bosque, cerca a tala de árboles	1.5
Pasivo	LEI05		Carolina Paniagua, Victor Martínez, Juan M. Daza	Carolina Paniagua, Victor Martínez, Juan M. Daza	cpaniaguav@unal.edu.co	Conservacion Biologica utilizando Inteligencia Artificial, Programa 898	Minciencias-UdeA-ITM-IAVH	Colombia	Antioquia	La Estrella		Zona Rural, cerca a vía principal	6.11753	-75.6399	Celular	Exacta	WGS84			2023	4	18	2023	5	3	Funcional	AudioMoth 1.2.0	Plastic Tupper	G0056	built_in		Mono	192000		Medium - high (4/5)	Alkaline AA	32GB Sandisk Extreme		En árbol en medio de potrero	1.5
Pasivo	LEI06		Carolina Paniagua, Victor Martínez, Juan M. Daza	Carolina Paniagua, Victor Martínez, Juan M. Daza	cpaniaguav@unal.edu.co	Conservacion Biologica utilizando Inteligencia Artificial, Programa 899	Minciencias-UdeA-ITM-IAVH	Colombia	Antioquia	La Estrella		Zona Urbana	6.11264	-75.637	Celular	Exacta	WGS84			2023	4	18	2023	5	3	Funcional	AudioMoth 1.0.0	Plastic Tupper	G0097	built_in		Mono	192000		Medium - high (4/5)	Alkaline AA	32GB Sandisk Extreme		En zona urbana, al lado de carretera que conduce a caserío	1.5
Pasivo	LEJ01		Carolina Paniagua, Victor Martínez, Juan M. Daza	Carolina Paniagua, Victor Martínez, Juan M. Daza	cpaniaguav@unal.edu.co	Conservacion Biologica utilizando Inteligencia Artificial, Programa 900	Minciencias-UdeA-ITM-IAVH	Colombia	Antioquia	La Estrella		Zona Urbana	6.15409	-75.6321	Celular	Exacta	WGS84			2023	4	18	2023	5	3	Funcional	AudioMoth 1.2.0	Plastic Tupper	G0083	built_in		Mono	192000		Medium - high (4/5)	Alkaline AA	32GB Sandisk Extreme		Árbol a borde de carretera, zona residencial	1.5
Pasivo	LEJ02		Carolina Paniagua, Victor Martínez, Juan M. Daza	Carolina Paniagua, Victor Martínez, Juan M. Daza	cpaniaguav@unal.edu.co	Conservacion Biologica utilizando Inteligencia Artificial, Programa 901	Minciencias-UdeA-ITM-IAVH	Colombia	Antioquia	La Estrella		Zona Urbana	6.14583	-75.6338	Celular	Exacta	WGS84			2023	4	20	2023	5	3	Funcional	AudioMoth 1.2.0	Plastic Tupper	G0043	built_in		Mono	192000		Medium - high (4/5)	Alkaline AA	32GB Sandisk Extreme		Grabadora ubicada en el jardín de una casa, con carretera al lado con alto flujo de carros y motos.	1.5
Pasivo	LEJ03		Carolina Paniagua, Victor Martínez, Juan M. Daza	Carolina Paniagua, Victor Martínez, Juan M. Daza	cpaniaguav@unal.edu.co	Conservacion Biologica utilizando Inteligencia Artificial, Programa 902	Minciencias-UdeA-ITM-IAVH	Colombia	Antioquia	La Estrella		Zona Urbana	6.13873	-75.6352	Celular	Exacta	WGS84			2023	4	20				ROBADA, pero se recuperó la memoria	AudioMoth 1.0.0	Plastic Tupper	G0010	built_in		Mono	192000		Medium - high (4/5)	Alkaline AA	32GB Sandisk Extreme		En bosque urbano	1.5
Pasivo	LEJ04		Carolina Paniagua, Victor Martínez, Juan M. Daza	Carolina Paniagua, Victor Martínez, Juan M. Daza	cpaniaguav@unal.edu.co	Conservacion Biologica utilizando Inteligencia Artificial, Programa 903	Minciencias-UdeA-ITM-IAVH	Colombia	Antioquia	La Estrella		Zona Urbana	6.12733	-75.6336	Celular	Exacta	WGS84			2023	4	18	2023	5	3	Funcional	AudioMoth 1.2.0	Plastic Tupper	G0082	built_in		Mono	192000		Medium - high (4/5)	Alkaline AA	32GB Sandisk Extreme		Al lado de autopista	1.5
Pasivo	LEJ05		Carolina Paniagua, Victor Martínez, Juan M. Daza	Carolina Paniagua, Victor Martínez, Juan M. Daza	cpaniaguav@unal.edu.co	Conservacion Biologica utilizando Inteligencia Artificial, Programa 904	Minciencias-UdeA-ITM-IAVH	Colombia	Antioquia	La Estrella		Zona Urbana	6.11547	-75.6331	Celular	Exacta	WGS84			2023	4	17	2023	5	4	Funcional	AudioMoth 1.1.0	Plastic Tupper	G0018	built_in		Mono	192000		Medium - high (4/5)	Alkaline AA	32GB Sandisk Extreme		Camiones entrando constrantemente, construcción, cerca a variante. Al lado del guadual mirando hacia pasos con eucaliptos	1.5
Pasivo	LEJ06		Carolina Paniagua, Victor Martínez, Juan M. Daza	Carolina Paniagua, Victor Martínez, Juan M. Daza	cpaniaguav@unal.edu.co	Conservacion Biologica utilizando Inteligencia Artificial, Programa 905	Minciencias-UdeA-ITM-IAVH	Colombia	Antioquia	La Estrella		Zona Urbana	6.11332	-75.6332	Celular	Exacta	WGS84			2023	4	17	2023	5	4	Funcional	AudioMoth 1.1.0	Plastic Tupper	G0029	built_in		Mono	192000		Medium - high (4/5)	Alkaline AA	32GB Sandisk Extreme		Ubicada en presidio con la variante caldas a la presidencia de eucaliptos, hay presencia de pequeñas plantas, rastreras presencia de algunos elementos naturales dispersos	1.5
Pasivo	LEK01		Carolina Paniagua, Victor Martínez, Juan M. Daza	Carolina Paniagua, Victor Martínez, Juan M. Daza	cpaniaguav@unal.edu.co	Conservacion Biologica utilizando Inteligencia Artificial, Programa 906	Minciencias-UdeA-ITM-IAVH	Colombia	Antioquia	La Estrella		Zona Urbana	6.15952	-75.6293	Celular	Exacta	WGS84			2023	4	18	2023	5	3	Funcional	AudioMoth 1.2.0	Plastic Tupper	G0087	built_in		Mono	192000		Medium - high (4/5)	Alkaline AA	32GB Sandisk Extreme		Bosque dentro de una unidad en zona urbana	1.5
Pasivo	LEK02		Carolina Paniagua, Victor Martínez, Juan M. Daza	Carolina Paniagua, Victor Martínez, Juan M. Daza	cpaniaguav@unal.edu.co	Conservacion Biologica utilizando Inteligencia Artificial, Programa 907	Minciencias-UdeA-ITM-IAVH	Colombia	Antioquia	La Estrella		Zona Urbana	6.1571	-75.6265	Celular	Exacta	WGS84			2023	4	18	2023	5	3	Funcional	AudioMoth 1.2.0	Plastic Tupper	G0063	built_in		Mono	192000		Medium - high (4/5)	Alkaline AA	32GB Sandisk Extreme		Al lado de via principal, al frende de centro comercial	1.5
Pasivo	LEK03		Carolina Paniagua, Victor Martínez, Juan M. Daza	Carolina Paniagua, Victor Martínez, Juan M. Daza	cpaniaguav@unal.edu.co	Conservacion Biologica utilizando Inteligencia Artificial, Programa 908	Minciencias-UdeA-ITM-IAVH	Colombia	Antioquia	La Estrella		Zona Urbana	6.1303	-75.6299	Celular	Exacta	WGS84			2023	4	17	2023	5	4	Grabadora con humedad	AudioMoth 1.0.0	Plastic Tupper	G0001	built_in		Mono	192000		Medium - high (4/5)	Alkaline AA	16GB Sandisk Extreme		Al lado de variante a Caldas, mucho ruido. Sobre barranco con vegetacion secundaria	1.5
Pasivo	LEK04		Carolina Paniagua, Victor Martínez, Juan M. Daza	Carolina Paniagua, Victor Martínez, Juan M. Daza	cpaniaguav@unal.edu.co	Conservacion Biologica utilizando Inteligencia Artificial, Programa 909	Minciencias-UdeA-ITM-IAVH	Colombia	Antioquia	La Estrella		Zona Urbana	6.12211	-75.6299	Celular	Exacta	WGS84			2023	4	17	2023	5	5	Funcional	AudioMoth 1.2.0	Plastic Tupper	G0092	built_in		Mono	192000		Medium - high (4/5)	Alkaline AA	32GB Sandisk Extreme		Mirando a cuerpo de agua, cerca a variante caldas en árbol.	1.5
Pasivo	LEK05		Carolina Paniagua, Victor Martínez, Juan M. Daza	Carolina Paniagua, Victor Martínez, Juan M. Daza	cpaniaguav@unal.edu.co	Conservacion Biologica utilizando Inteligencia Artificial, Programa 910	Minciencias-UdeA-ITM-IAVH	Colombia	Antioquia	La Estrella		Zona Rural	6.1124	-75.6284	Celular	Exacta	WGS84			2023	4	17	2023	5	5	Grabadora con humedad	AudioMoth 1.2.0	Plastic Tupper	G0051	built_in		Mono	192000		Medium - high (4/5)	Alkaline AA	32GB Sandisk Extreme		Cercano a cuerpo de agua y aguacates. Sobre barranco, apuntando a fragmento de ripario	1.5
Pasivo	LEK06		Carolina Paniagua, Victor Martínez, Juan M. Daza	Carolina Paniagua, Victor Martínez, Juan M. Daza	cpaniaguav@unal.edu.co	Conservacion Biologica utilizando Inteligencia Artificial, Programa 911	Minciencias-UdeA-ITM-IAVH	Colombia	Antioquia	La Estrella		Zona Rural	6.10923	-75.6257	Celular	Exacta	WGS84			2023	4	17	2023	5	4	Funcional	AudioMoth 1.2.0	Plastic Tupper	G0090	built_in		Mono	192000		Medium - high (4/5)	Alkaline AA	32GB Sandisk Extreme		En barranco, en bosque de parcelación. atrás, hay pastos y casas	1.5
Pasivo	LEL01		Carolina Paniagua, Victor Martínez, Juan M. Daza	Carolina Paniagua, Victor Martínez, Juan M. Daza	cpaniaguav@unal.edu.co	Conservacion Biologica utilizando Inteligencia Artificial, Programa 912	Minciencias-UdeA-ITM-IAVH	Colombia	Antioquia	La Estrella		Zona Rural	6.12715	-75.6251	Celular	Exacta	WGS84			2023	4	17	2023	5	4	Funcional	AudioMoth 1.1.0	Plastic Tupper	G0030	built_in		Mono	192000		Medium - high (4/5)	Alkaline AA	32GB Sandisk Extreme		Ubicada cerca a corredor de quebrada en zona rural, cerca a casa, se escucha la quebrada. bosque, cultivos de café al rededor	1.5
Pasivo	LEL02		Carolina Paniagua, Victor Martínez, Juan M. Daza	Carolina Paniagua, Victor Martínez, Juan M. Daza	cpaniaguav@unal.edu.co	Conservacion Biologica utilizando Inteligencia Artificial, Programa 913	Minciencias-UdeA-ITM-IAVH	Colombia	Antioquia	La Estrella		Zona Urbana	6.11808	-75.6259	Celular	Exacta	WGS84			2023	4	17	2023	5	5	Funcional	AudioMoth 1.2.0	Plastic Tupper	G0067	built_in		Mono	192000		Medium - high (4/5)	Alkaline AA	32GB Sandisk Extreme		Barranco, al lado de quebrada. Bosque de ciateas, Helechos. Cerca a una bodega, maquinas y camiones, cerca a quebrada	1.5
Pasivo	LEL03		Carolina Paniagua, Victor Martínez, Juan M. Daza	Carolina Paniagua, Victor Martínez, Juan M. Daza	cpaniaguav@unal.edu.co	Conservacion Biologica utilizando Inteligencia Artificial, Programa 914	Minciencias-UdeA-ITM-IAVH	Colombia	Antioquia	La Estrella		Zona Rural	6.11154	-75.6264	Celular	Exacta	WGS84			2023	4	20	2023	5	4	Funcional	AudioMoth 1.1.0	Plastic Tupper	G0094	built_in		Mono	192000		Medium - high (4/5)	Alkaline AA	32GB Sandisk Extreme		Corredor quebrada en Parcelacion rural, corredor de bosque por quebrada, en parcelación, al fondo ruido de variante, murmullo de quebrada	1.5
Pasivo	LEM01		Carolina Paniagua, Victor Martínez, Juan M. Daza	Carolina Paniagua, Victor Martínez, Juan M. Daza	cpaniaguav@unal.edu.co	Conservacion Biologica utilizando Inteligencia Artificial, Programa 915	Minciencias-UdeA-ITM-IAVH	Colombia	Antioquia	La Estrella		Zona Rural	6.12657	-75.6207	Celular	Exacta	WGS84			2023	4	17	2023	5	4	Funcional	AudioMoth 1.1.0	Plastic Tupper	G0020	built_in		Mono	192000		Medium - high (4/5)	Alkaline AA	32GB Sandisk Extreme		En inicio de bosque entre potreros	1.5
Pasivo	LEM02		Carolina Paniagua, Victor Martínez, Juan M. Daza	Carolina Paniagua, Victor Martínez, Juan M. Daza	cpaniaguav@unal.edu.co	Conservacion Biologica utilizando Inteligencia Artificial, Programa 916	Minciencias-UdeA-ITM-IAVH	Colombia	Antioquia	La Estrella		Zona Rural	6.12324	-75.6228	Celular	Exacta	WGS84			2023	4	17	2023	5	4	Funcional	AudioMoth 1.2.0	Plastic Tupper	G0064	built_in		Mono	192000		Medium - high (4/5)	Alkaline AA	32GB Sandisk Extreme		Bosque dentro de urbanización	1.5
Pasivo	LEM03		Carolina Paniagua, Victor Martínez, Juan M. Daza	Carolina Paniagua, Victor Martínez, Juan M. Daza	cpaniaguav@unal.edu.co	Conservacion Biologica utilizando Inteligencia Artificial, Programa 917	Minciencias-UdeA-ITM-IAVH	Colombia	Antioquia	La Estrella		Zona Rural	6.11658	-75.6237	Celular	Exacta	WGS84			2023	4	17	2023	5	5	Funcional	AudioMoth 1.2.0	Plastic Tupper	G0091	built_in		Mono	192000		Medium - high (4/5)	Alkaline AA	32GB Sandisk Extreme		Cerca a construcción, quebrada pequeña, en retiro de quebrada	1.5
Pasivo	LEM04		Carolina Paniagua, Victor Martínez, Juan M. Daza	Carolina Paniagua, Victor Martínez, Juan M. Daza	cpaniaguav@unal.edu.co	Conservacion Biologica utilizando Inteligencia Artificial, Programa 918	Minciencias-UdeA-ITM-IAVH	Colombia	Antioquia	La Estrella		Reserva Natural Miraflores	6.11299	-75.6182	Celular	Exacta	WGS84			2023	4	17	2023	5	5	Grabadora con humedad	AudioMoth 1.2.0	Plastic Tupper	G0103	built_in		Mono	192000		Medium - high (4/5)	Alkaline AA	32GB Sandisk Extreme		Bosque reserva miraflores, humedal	1.5
Pasivo	LEN02		Carolina Paniagua, Victor Martínez, Juan M. Daza	Carolina Paniagua, Victor Martínez, Juan M. Daza	cpaniaguav@unal.edu.co	Conservacion Biologica utilizando Inteligencia Artificial, Programa 920	Minciencias-UdeA-ITM-IAVH	Colombia	Antioquia	La Estrella		Zona Rural	6.11638	-75.6132	Celular	Exacta	WGS84			2023	4	20	2023	5	5	Grabadora con humedad	AudioMoth 1.2.0	Plastic Tupper	G0102	built_in		Mono	192000		Medium - high (4/5)	Alkaline AA	32GB Sandisk Extreme		En corredor de bosque con potreros al rededor	1.5
Pasivo	LEO01		Carolina Paniagua, Victor Martínez, Juan M. Daza	Carolina Paniagua, Victor Martínez, Juan M. Daza	cpaniaguav@unal.edu.co	Conservacion Biologica utilizando Inteligencia Artificial, Programa 921	Minciencias-UdeA-ITM-IAVH	Colombia	Antioquia	La Estrella		Zona Rural	6.12077	-75.6118	Celular	Exacta	WGS84			2023	4	17	2023	5	4	Grabadora con humedad	AudioMoth 1.0.0	Plastic Tupper	G0008	built_in		Mono	192000		Medium - high (4/5)	Alkaline AA	32GB Sandisk Extreme		Bosque entre potreros	1.5
Pasivo	LEO02		Carolina Paniagua, Victor Martínez, Juan M. Daza	Carolina Paniagua, Victor Martínez, Juan M. Daza	cpaniaguav@unal.edu.co	Conservacion Biologica utilizando Inteligencia Artificial, Programa 922	Minciencias-UdeA-ITM-IAVH	Colombia	Antioquia	La Estrella		Zona Rural	6.11641	-75.6098	Celular	Exacta	WGS84			2023	4	20	2023	5	5	Grabadora con humedad	AudioMoth 1.2.0	Plastic Tupper	G0093	built_in		Mono	192000		Medium - high (4/5)	Alkaline AA	32GB Sandisk Extreme		Bosque cerca a casa, finca ganadera, al lado de pequeña quebrada	1.5
Pasivo	LEExtra		Carolina Paniagua, Victor Martínez, Juan M. Daza	Carolina Paniagua, Victor Martínez, Juan M. Daza	cpaniaguav@unal.edu.co	Conservacion Biologica utilizando Inteligencia Artificial, Programa 923	Minciencias-UdeA-ITM-IAVH	Colombia	Antioquia	La Estrella		Reserva Natural El Romeral	6.15321	-75.6793	Celular	Exacta	WGS84			2023	4	18	2023	5	3	Funcional	AudioMoth 1.2.0	Plastic Tupper	G0087	built_in		Mono	192000		Medium - high (4/5)	Alkaline AA	32GB Sandisk Extreme		Parte alta el Romeral, bosque caña brava, poca diversidad de especies de flora	1.5
Pasivo	LEExtra2		Carolina Paniagua, Victor Martínez, Juan M. Daza	Carolina Paniagua, Victor Martínez, Juan M. Daza	cpaniaguav@unal.edu.co	Conservacion Biologica utilizando Inteligencia Artificial, Programa 924	Minciencias-UdeA-ITM-IAVH	Colombia	Antioquia	La Estrella		Zona urbana	6.11303	-75.6295	Celular	Exacta	WGS84			2023	4	20	2023	5	5	Funcional	AudioMoth 1.1.0	Plastic Tupper	G0025	built_in		Mono	192000		Medium - high (4/5)	Alkaline AA	32GB Sandisk Extreme		Fábrica al aldo con extractor encendido todo el tiempo, unión de dos quebradas, con corredor de bosque en ambas	1.5
