# Supplementary material for: A workflow to optimize spatial sampling in ecoacoustic studies
Source: Research Square preprint supplement (doi:10.21203/rs.3.rs-7207339/v1), 2025-10-10
Supplement: Supplementary file 28 [file UDAS_Plains.xlsx]

## Sheet: Vocabulary
Variable	Class	Variable	Value	Units
1	Project	Method_PR	Pasivo	text
2	Project	field_number_PR	Nombre de carpeta con grabaciones	text
3	Project	voucher_PR	Aplica cuando es grabacion direccional	text
4	Project	collector_first_name_PR		text
5	Project	collector_last_name_PR		text
6	Project	collector_email_PR		text
7	Project	project_name_PR		text
8	Project	funding_PR	Entidad financiadora	text
9	Geographic Information	country_IG		text
10	Geographic Information	department_IG		text
11	Geographic Information	municipality_IG		text
12	Geographic Information	vereda_IG		text
13	Geographic Information	locality_IG		text
14	Geographic Information	latitude_IG	en decimales	numeric, decimal
15	Geographic Information	longitud_IG	en decimales	numeric, decimal
16	Geographic Information	coordinates_source_IG	e.g., GPS, Celular, GoogleEarth, etc	text
17	Geographic Information	precision_IG	en metros	numeric
18	Geographic Information	datum_IG	e.g., WGS84	numeric
19	Geographic Information	min_elevation_IG
20	Geographic Information	max_elevation_IG
21	Date information	year_int_TI	Año inicio	numeric
22	Date information	month_init_TI	Mes inicio	numeric
23	Date information	day_init_TI	Día inicio	numeric
24	Date information	year_end_TI	Año fin	numeric
25	Date information	month_end_TI	Mes fin	numeric
26	Date information	day_end_TI	Día fin	numeric
27	Date information	obs_TI	Observaciones fechas	numeric
28	Recorder	recorder_RE	marca grabadora	text
29	Recorder	rec_case_RE	carcasa de la grabadora (si aplica)	text
30	Recorder	rec_serial_RE	serial de la grabadora	alphanumeric
31	Recorder	microphone_RE		text
32	Recorder	mic_serial_RE		alphanumeric
33	Recorder	channels_RE	e.g., mono	text
34	Recorder	filters_RE		text
35	Recorder	gain_RE	ganancia en decibeles	numeric
36	Recorder	power_source_RE	Tipo de baterias o fuente de poder	text
37	Recorder	memory_card_RE	marca de la memoria	text
38	Recorder	obs_RE		text
39	Habitat	habitat_HA	basado en observacion in situ	text
40	Habitat	rec_height_HA	altura de despliegue de la grabadora	numeric
41	Habitat	season_HA	e.g., lluvia, seca, transicion	text
42	Habitat	climatic_data_HA	e.g., Temperatura, Humedad, etc.	text
43	Habitat	obs_HA		text
44	Landscape variables	Buffer_LV	Búffer de posición	numeric
45	Landscape variables	Cobdos_LV	Cobertura de dosel, obtenido de CANOPEO	numeric
46	Landscape variables	Perf_LV	Perfil de vegetación, obtenido de CANOPEO	numeric
47	Landscape variables	DC_LV	Distancia al centro del pozo	numeric
48	Landscape variables	DCO_LV	Distancia a construcciones o zona industrial comercial	numeric
49	Landscape variables	VS_LV	Distancia a vías	numeric
50	Landscape variables	DOS_LV	Altura del dosel, obtenido de Potapov et al. 2020	numeric
51	Landscape variables	AG_LV	Distancia a cuerpos de agua	numeric
52	Landscape variables	ZI_LV	Distancia a zonas inundables	numeric
53	Landscape variables	COV_LV	Cobertura dominante	text
54	Multimedia	Video_MM	Bajo evaluación
55	Multimedia	Image_MM

## Sheet: Template
Method_PR	field_number_PR	voucher_PR	collector_first_name_PR	collector_last_name_PR	collector_email_PR	project_name_PR	funding_PR	country_IG	department_IG	municipality_IG	vereda_IG	locality_IG	latitude_IG	longitud_IG	coordinates_source_IG	precision_IG	datum_IG	min_elevation_IG	max_elevation_IG	year_init_TI	month_init_TI	day_init_TI	year_end_TI	month_end_TI	day_end_TI	obs_TI	recorder_RE	rec_case_RE	rec_serial_RE	microphone_RE	mic_serial_RE	channels_RE	samp_rate_RE	filters_RE	gain_RE	power_source_RE	memory_card_RE	obs_RE	habitat_HA	rec_height_HA	season_HA	climatic_data_HA	obs_HA
Pasivo	RZUA01		Juan M. Daza, Claudia V. Isaza, Jose D. Lopez, Victor M. Martinez, Carolina Paniagua, Edison Ramirez, Daniel A. Rodriguez, Camilo Sanchez	Juan M. Daza, Claudia V. Isaza, Jose D. Lopez, Victor M. Martinez, Carolina Paniagua, Edison Ramirez, Daniel A. Rodriguez, Camilo Sanchez	juanm.daza@udea.edu.co, victoria.isaza@udea.edu.co, jdavid.lopez@udea.edu.co	Conservacion Biologica utilizando Inteligencia Artificial, Programa 852	Minciencias-UdeA-ITM-IAVH	Colombia	Meta	San Martin		Reserva Natural de la Sociedad Civil Rey Zamuro-Matarredonda	3.55586	-73.4117	Celular	Exacta	WGS84			2022	9	3	2022	9	14	Funcional	AudioMoth 1.2.0	Ziploc bag	G0082	built_in		Mono	192000		Medium	Alkaline AA	32GB Sandisk Extreme		Interior de bosque, plano, con sotobosque.	1.5		Temperature
Pasivo	RZUA02		Juan M. Daza, Claudia V. Isaza, Jose D. Lopez, Victor M. Martinez, Carolina Paniagua, Edison Ramirez, Daniel A. Rodriguez, Camilo Sanchez	Juan M. Daza, Claudia V. Isaza, Jose D. Lopez, Victor M. Martinez, Carolina Paniagua, Edison Ramirez, Daniel A. Rodriguez, Camilo Sanchez	juanm.daza@udea.edu.co, victoria.isaza@udea.edu.co, jdavid.lopez@udea.edu.co	Conservacion Biologica utilizando Inteligencia Artificial, Programa 852	Minciencias-UdeA-ITM-IAVH	Colombia	Meta	San Martin		Reserva Natural de la Sociedad Civil Rey Zamuro-Matarredonda	3.55227	-73.4117	Celular	Exacta	WGS84			2022	9	3	2022	9	14	Inundada. Bolsa muy comida en la parte superior. Rescatados en Linux	AudioMoth 1.1.0	Ziploc bag	G0098	built_in		Mono	192000		Medium	Alkaline AA	32GB Sandisk Extreme		Interior de bosque, plano, con sotobosque. Ubicado en área ligeramente elevada.	1.5		Temperature
Pasivo	RZUA03b		Juan M. Daza, Claudia V. Isaza, Jose D. Lopez, Victor M. Martinez, Carolina Paniagua, Edison Ramirez, Daniel A. Rodriguez, Camilo Sanchez	Juan M. Daza, Claudia V. Isaza, Jose D. Lopez, Victor M. Martinez, Carolina Paniagua, Edison Ramirez, Daniel A. Rodriguez, Camilo Sanchez	juanm.daza@udea.edu.co, victoria.isaza@udea.edu.co, jdavid.lopez@udea.edu.co	Conservacion Biologica utilizando Inteligencia Artificial, Programa 852	Minciencias-UdeA-ITM-IAVH	Colombia	Meta	San Martin		Reserva Natural de la Sociedad Civil Rey Zamuro-Matarredonda	3.54878	-73.4115	Celular	Exacta	WGS84			2022	9	8	2022	9	14	Funcional	AudioMoth 1.2.0	Ziploc bag	G0075	built_in		Mono	192000		Medium	Alkaline AA	32GB Sandisk Extreme	Fue puesta el día 8 de septiembre de 2022, y su ubicación se movió levemente.	Ubicada en árbol adjunto a camino y cercano a bosque, en área dominada por pastos y en filo.	1.5		Temperature
Pasivo	RZUA03a		Juan M. Daza, Claudia V. Isaza, Jose D. Lopez, Victor M. Martinez, Carolina Paniagua, Edison Ramirez, Daniel A. Rodriguez, Camilo Sanchez	Juan M. Daza, Claudia V. Isaza, Jose D. Lopez, Victor M. Martinez, Carolina Paniagua, Edison Ramirez, Daniel A. Rodriguez, Camilo Sanchez	juanm.daza@udea.edu.co, victoria.isaza@udea.edu.co, jdavid.lopez@udea.edu.co	Conservacion Biologica utilizando Inteligencia Artificial, Programa 852	Minciencias-UdeA-ITM-IAVH	Colombia	Meta	San Martin		Reserva Natural de la Sociedad Civil Rey Zamuro-Matarredonda	3.54864	-73.4117	Celular	Exacta	WGS84			2022	9	3	2022	9	7		AudioMoth 1.2.0	Ziploc bag	G0068	built_in		Mono	192000		Medium	Alkaline AA	32GB Sandisk Extreme	Fue retirada por inundación el día 7 de septiembre de 2022	Ubicada a salida de bosque, apuntando a camino. Borde	1.5		Temperature
Pasivo	RZUA04		Juan M. Daza, Claudia V. Isaza, Jose D. Lopez, Victor M. Martinez, Carolina Paniagua, Edison Ramirez, Daniel A. Rodriguez, Camilo Sanchez	Juan M. Daza, Claudia V. Isaza, Jose D. Lopez, Victor M. Martinez, Carolina Paniagua, Edison Ramirez, Daniel A. Rodriguez, Camilo Sanchez	juanm.daza@udea.edu.co, victoria.isaza@udea.edu.co, jdavid.lopez@udea.edu.co	Conservacion Biologica utilizando Inteligencia Artificial, Programa 852	Minciencias-UdeA-ITM-IAVH	Colombia	Meta	San Martin		Reserva Natural de la Sociedad Civil Rey Zamuro-Matarredonda	3.54498	-73.4115	Celular	Exacta	WGS84			2022	9	3	2022	9	14	Mojada, alumbra rojo.	AudioMoth 1.2.0	Ziploc bag	G0024	built_in		Mono	192000		Medium	Alkaline AA	32GB Sandisk Extreme		Ubicada en árbol, en borde, en parche de vegetación levemente aislado de área de bosque.	1.5		Temperature
Pasivo	RZUA05		Juan M. Daza, Claudia V. Isaza, Jose D. Lopez, Victor M. Martinez, Carolina Paniagua, Edison Ramirez, Daniel A. Rodriguez, Camilo Sanchez	Juan M. Daza, Claudia V. Isaza, Jose D. Lopez, Victor M. Martinez, Carolina Paniagua, Edison Ramirez, Daniel A. Rodriguez, Camilo Sanchez	juanm.daza@udea.edu.co, victoria.isaza@udea.edu.co, jdavid.lopez@udea.edu.co	Conservacion Biologica utilizando Inteligencia Artificial, Programa 852	Minciencias-UdeA-ITM-IAVH	Colombia	Meta	San Martin		Reserva Natural de la Sociedad Civil Rey Zamuro-Matarredonda	3.54136	-73.4116	Celular	Exacta	WGS84			2022	9	5	2022	9	13	Funcional	AudioMoth 1.1.0	Ziploc bag	G0020	built_in		Mono	192000		Medium	Alkaline AA	32GB Sandisk Extreme		Ubicada en borde, apuntando a sabana (a unos 10m de éste).	1.5		Temperature
Pasivo	RZUA06		Juan M. Daza, Claudia V. Isaza, Jose D. Lopez, Victor M. Martinez, Carolina Paniagua, Edison Ramirez, Daniel A. Rodriguez, Camilo Sanchez	Juan M. Daza, Claudia V. Isaza, Jose D. Lopez, Victor M. Martinez, Carolina Paniagua, Edison Ramirez, Daniel A. Rodriguez, Camilo Sanchez	juanm.daza@udea.edu.co, victoria.isaza@udea.edu.co, jdavid.lopez@udea.edu.co	Conservacion Biologica utilizando Inteligencia Artificial, Programa 852	Minciencias-UdeA-ITM-IAVH	Colombia	Meta	San Martin		Reserva Natural de la Sociedad Civil Rey Zamuro-Matarredonda	3.53785	-73.4115	Celular	Exacta	WGS84			2022	9	4	2022	9	13	Funcional	AudioMoth 1.2.0	Ziploc bag	G0076	built_in		Mono	192000		Medium	Alkaline AA	32GB Sandisk Extreme		Ubicada en bosque, en filo con descenso de tierra atrás.	1.5		Temperature
Pasivo	RZUA07		Juan M. Daza, Claudia V. Isaza, Jose D. Lopez, Victor M. Martinez, Carolina Paniagua, Edison Ramirez, Daniel A. Rodriguez, Camilo Sanchez	Juan M. Daza, Claudia V. Isaza, Jose D. Lopez, Victor M. Martinez, Carolina Paniagua, Edison Ramirez, Daniel A. Rodriguez, Camilo Sanchez	juanm.daza@udea.edu.co, victoria.isaza@udea.edu.co, jdavid.lopez@udea.edu.co	Conservacion Biologica utilizando Inteligencia Artificial, Programa 852	Minciencias-UdeA-ITM-IAVH	Colombia	Meta	San Martin		Reserva Natural de la Sociedad Civil Rey Zamuro-Matarredonda	3.53451	-73.4114	Celular	Exacta	WGS84			2022	9	5	2022	9	13	Funcional	AudioMoth 1.1.0	Ziploc bag	G0018	built_in		Mono	192000		Medium	Alkaline AA	32GB Sandisk Extreme		Ubicada en sabana, con cercanía a cerca electrificada.	1.5		Temperature
Pasivo	RZUA08		Juan M. Daza, Claudia V. Isaza, Jose D. Lopez, Victor M. Martinez, Carolina Paniagua, Edison Ramirez, Daniel A. Rodriguez, Camilo Sanchez	Juan M. Daza, Claudia V. Isaza, Jose D. Lopez, Victor M. Martinez, Carolina Paniagua, Edison Ramirez, Daniel A. Rodriguez, Camilo Sanchez	juanm.daza@udea.edu.co, victoria.isaza@udea.edu.co, jdavid.lopez@udea.edu.co	Conservacion Biologica utilizando Inteligencia Artificial, Programa 852	Minciencias-UdeA-ITM-IAVH	Colombia	Meta	San Martin		Reserva Natural de la Sociedad Civil Rey Zamuro-Matarredonda	3.53069	-73.4116	Celular	Exacta	WGS84			2022	9	4	2022	9	13	Funcional	AudioMoth 1.2.0	Ziploc bag	G0092	built_in		Mono	192000		Medium	Alkaline AA	32GB Sandisk Extreme		Ubicada en bosque, cerca a filo que desemboca en cuerpo de agua.	1.5		Temperature
Pasivo	RZUA09		Juan M. Daza, Claudia V. Isaza, Jose D. Lopez, Victor M. Martinez, Carolina Paniagua, Edison Ramirez, Daniel A. Rodriguez, Camilo Sanchez	Juan M. Daza, Claudia V. Isaza, Jose D. Lopez, Victor M. Martinez, Carolina Paniagua, Edison Ramirez, Daniel A. Rodriguez, Camilo Sanchez	juanm.daza@udea.edu.co, victoria.isaza@udea.edu.co, jdavid.lopez@udea.edu.co	Conservacion Biologica utilizando Inteligencia Artificial, Programa 852	Minciencias-UdeA-ITM-IAVH	Colombia	Meta	San Martin		Reserva Natural de la Sociedad Civil Rey Zamuro-Matarredonda	3.52709	-73.4121	Celular	Exacta	WGS84			2022	9	4	2022	9	10	Inundada, dañada	AudioMoth 1.0.0	Ziploc bag	G0099	built_in		Mono	192000		Medium	Alkaline AA	32GB Sandisk Extreme		Ubicada en borde, apuntando a 4 m de sabana y a un pequeño parche de bosque ubicado a 60m	1.5
Pasivo	RZUA10		Juan M. Daza, Claudia V. Isaza, Jose D. Lopez, Victor M. Martinez, Carolina Paniagua, Edison Ramirez, Daniel A. Rodriguez, Camilo Sanchez	Juan M. Daza, Claudia V. Isaza, Jose D. Lopez, Victor M. Martinez, Carolina Paniagua, Edison Ramirez, Daniel A. Rodriguez, Camilo Sanchez	juanm.daza@udea.edu.co, victoria.isaza@udea.edu.co, jdavid.lopez@udea.edu.co	Conservacion Biologica utilizando Inteligencia Artificial, Programa 852	Minciencias-UdeA-ITM-IAVH	Colombia	Meta	San Martin		Reserva Natural de la Sociedad Civil Rey Zamuro-Matarredonda	3.52328	-73.4117	Celular	Exacta	WGS84			2002	9	4	2022	9	12	Funcional	AudioMoth 1.2.0	Ziploc bag	G0091	built_in		Mono	192000		Medium	Alkaline AA	32GB Sandisk Extreme		Ubicada en interior de bosque, cerca a tronco caído. Sotobosque evidente	1.5
Pasivo	RZUB01		Juan M. Daza, Claudia V. Isaza, Jose D. Lopez, Victor M. Martinez, Carolina Paniagua, Edison Ramirez, Daniel A. Rodriguez, Camilo Sanchez	Juan M. Daza, Claudia V. Isaza, Jose D. Lopez, Victor M. Martinez, Carolina Paniagua, Edison Ramirez, Daniel A. Rodriguez, Camilo Sanchez	juanm.daza@udea.edu.co, victoria.isaza@udea.edu.co, jdavid.lopez@udea.edu.co	Conservacion Biologica utilizando Inteligencia Artificial, Programa 852	Minciencias-UdeA-ITM-IAVH	Colombia	Meta	San Martin		Reserva Natural de la Sociedad Civil Rey Zamuro-Matarredonda	3.55587	-73.408	Celular	Exacta	WGS84			2022	9	3	2022	9	14	Funcinoal. Datos rescatados en Linux	AudioMoth 1.2.0	Ziploc bag	G0047	built_in		Mono	192000		Medium	Alkaline AA	32GB Sandisk Extreme		En interior de bosque, cerca a pequeño arroyo.	1.5		Temperature
Pasivo	RZAB02		Juan M. Daza, Claudia V. Isaza, Jose D. Lopez, Victor M. Martinez, Carolina Paniagua, Edison Ramirez, Daniel A. Rodriguez, Camilo Sanchez	Juan M. Daza, Claudia V. Isaza, Jose D. Lopez, Victor M. Martinez, Carolina Paniagua, Edison Ramirez, Daniel A. Rodriguez, Camilo Sanchez	juanm.daza@udea.edu.co, victoria.isaza@udea.edu.co, jdavid.lopez@udea.edu.co	Conservacion Biologica utilizando Inteligencia Artificial, Programa 852	Minciencias-UdeA-ITM-IAVH	Colombia	Meta	San Martin		Reserva Natural de la Sociedad Civil Rey Zamuro-Matarredonda	3.55197	-73.4078	Celular	Exacta	WGS84			2022	9	3	2022	9	8	Bolsa rota atacada posiblemente por mico o por ave grabadora en el piso	AudioMoth 1.0.0	Ziploc bag	G0014	built_in		Mono	48000		Medium	Alkaline AA	32GB Sandisk Extreme	Retirada el 8, INICIALMENTE ESTABA EN FRECUENCIA AUDIBLE (O "BAJA").	En interior de bosque, ubicada en parte baja y cerca a filo.	1.5		Temperature
Pasivo	RZUB02		Juan M. Daza, Claudia V. Isaza, Jose D. Lopez, Victor M. Martinez, Carolina Paniagua, Edison Ramirez, Daniel A. Rodriguez, Camilo Sanchez	Juan M. Daza, Claudia V. Isaza, Jose D. Lopez, Victor M. Martinez, Carolina Paniagua, Edison Ramirez, Daniel A. Rodriguez, Camilo Sanchez	juanm.daza@udea.edu.co, victoria.isaza@udea.edu.co, jdavid.lopez@udea.edu.co	Conservacion Biologica utilizando Inteligencia Artificial, Programa 852	Minciencias-UdeA-ITM-IAVH	Colombia	Meta	San Martin		Reserva Natural de la Sociedad Civil Rey Zamuro-Matarredonda	3.55197	-73.4078	Celular	Exacta	WGS84			2022	9	8	2022	9	14	Bolsa rota atacada posiblemente por mico o por ave grabadora en el piso	AudioMoth 1.0.0	Ziploc bag	G0014	built_in		Mono	192000		Medium	Alkaline AA	32GB Sandisk Extreme	Reprogramada el 8 de septiembre de 2022, BAJO "ALTA"	En interior de bosque, ubicada en parte baja y cerca a filo.	1.5		Temperature
Pasivo	RZUB03		Juan M. Daza, Claudia V. Isaza, Jose D. Lopez, Victor M. Martinez, Carolina Paniagua, Edison Ramirez, Daniel A. Rodriguez, Camilo Sanchez	Juan M. Daza, Claudia V. Isaza, Jose D. Lopez, Victor M. Martinez, Carolina Paniagua, Edison Ramirez, Daniel A. Rodriguez, Camilo Sanchez	juanm.daza@udea.edu.co, victoria.isaza@udea.edu.co, jdavid.lopez@udea.edu.co	Conservacion Biologica utilizando Inteligencia Artificial, Programa 852	Minciencias-UdeA-ITM-IAVH	Colombia	Meta	San Martin		Reserva Natural de la Sociedad Civil Rey Zamuro-Matarredonda	3.54879	-73.4079	Celular	Exacta	WGS84			2022	9	3	2022	9	14	Funcional	AudioMoth 1.2.0	Ziploc bag	G0103	built_in		Mono	192000		Medium	Alkaline AA	32GB Sandisk Extreme		En interior de bosque	1.5		Temperature
Pasivo	RZUB04		Juan M. Daza, Claudia V. Isaza, Jose D. Lopez, Victor M. Martinez, Carolina Paniagua, Edison Ramirez, Daniel A. Rodriguez, Camilo Sanchez	Juan M. Daza, Claudia V. Isaza, Jose D. Lopez, Victor M. Martinez, Carolina Paniagua, Edison Ramirez, Daniel A. Rodriguez, Camilo Sanchez	juanm.daza@udea.edu.co, victoria.isaza@udea.edu.co, jdavid.lopez@udea.edu.co	Conservacion Biologica utilizando Inteligencia Artificial, Programa 852	Minciencias-UdeA-ITM-IAVH	Colombia	Meta	San Martin		Reserva Natural de la Sociedad Civil Rey Zamuro-Matarredonda	3.54521	-73.4081	Celular	Exacta	WGS84			2022	9	3	2022	9	11	Funcional	AudioMoth 1.2.0	Ziploc bag	G0080	built_in		Mono	192000		Medium	Alkaline AA	32GB Sandisk Extreme		En borde, apuntando hacía barranco y sabana.	1.5		Temperature
Pasivo	RZUB05		Juan M. Daza, Claudia V. Isaza, Jose D. Lopez, Victor M. Martinez, Carolina Paniagua, Edison Ramirez, Daniel A. Rodriguez, Camilo Sanchez	Juan M. Daza, Claudia V. Isaza, Jose D. Lopez, Victor M. Martinez, Carolina Paniagua, Edison Ramirez, Daniel A. Rodriguez, Camilo Sanchez	juanm.daza@udea.edu.co, victoria.isaza@udea.edu.co, jdavid.lopez@udea.edu.co	Conservacion Biologica utilizando Inteligencia Artificial, Programa 852	Minciencias-UdeA-ITM-IAVH	Colombia	Meta	San Martin		Reserva Natural de la Sociedad Civil Rey Zamuro-Matarredonda	3.5414	-73.408	Celular	Exacta	WGS84			2022	9	5	2022	9	13	Funcional	AudioMoth 1.1.0	Ziploc bag	G0030	built_in		Mono	192000		Medium	Alkaline AA	32GB Sandisk Extreme		En zona de borde, apuntando a potrero, que se ubica a 20m.	1.5		Temperature
Pasivo	RZUB06		Juan M. Daza, Claudia V. Isaza, Jose D. Lopez, Victor M. Martinez, Carolina Paniagua, Edison Ramirez, Daniel A. Rodriguez, Camilo Sanchez	Juan M. Daza, Claudia V. Isaza, Jose D. Lopez, Victor M. Martinez, Carolina Paniagua, Edison Ramirez, Daniel A. Rodriguez, Camilo Sanchez	juanm.daza@udea.edu.co, victoria.isaza@udea.edu.co, jdavid.lopez@udea.edu.co	Conservacion Biologica utilizando Inteligencia Artificial, Programa 852	Minciencias-UdeA-ITM-IAVH	Colombia	Meta	San Martin		Reserva Natural de la Sociedad Civil Rey Zamuro-Matarredonda	3.53777	-73.4074	Celular	Exacta	WGS84			2022	9	5	2022	9	13	Funcional	AudioMoth 1.1.0	Ziploc bag	G0022	built_in		Mono	192000		Medium	Alkaline AA	32GB Sandisk Extreme		En área con plántulas adyacentes, en zona de pastizal, cercana a áreas de bosque.	1.5		Temperature
Pasivo	RZUB07		Juan M. Daza, Claudia V. Isaza, Jose D. Lopez, Victor M. Martinez, Carolina Paniagua, Edison Ramirez, Daniel A. Rodriguez, Camilo Sanchez	Juan M. Daza, Claudia V. Isaza, Jose D. Lopez, Victor M. Martinez, Carolina Paniagua, Edison Ramirez, Daniel A. Rodriguez, Camilo Sanchez	juanm.daza@udea.edu.co, victoria.isaza@udea.edu.co, jdavid.lopez@udea.edu.co	Conservacion Biologica utilizando Inteligencia Artificial, Programa 852	Minciencias-UdeA-ITM-IAVH	Colombia	Meta	San Martin		Reserva Natural de la Sociedad Civil Rey Zamuro-Matarredonda	3.53392	-73.4079	Celular	Exacta	WGS84			2022	9	5	2022	9	13	Mojada, pero aparentemente funcional	AudioMoth 1.2.0	Ziploc bag	G0070	built_in		Mono	192000		Medium	Alkaline AA	32GB Sandisk Extreme		Potrero	1.5		Temperature
Pasivo	RZUB08		Juan M. Daza, Claudia V. Isaza, Jose D. Lopez, Victor M. Martinez, Carolina Paniagua, Edison Ramirez, Daniel A. Rodriguez, Camilo Sanchez	Juan M. Daza, Claudia V. Isaza, Jose D. Lopez, Victor M. Martinez, Carolina Paniagua, Edison Ramirez, Daniel A. Rodriguez, Camilo Sanchez	juanm.daza@udea.edu.co, victoria.isaza@udea.edu.co, jdavid.lopez@udea.edu.co	Conservacion Biologica utilizando Inteligencia Artificial, Programa 852	Minciencias-UdeA-ITM-IAVH	Colombia	Meta	San Martin		Reserva Natural de la Sociedad Civil Rey Zamuro-Matarredonda	3.53058	-73.4079	Celular	Exacta	WGS84			2022	9	4	2022	9	12	Funcional	AudioMoth 1.1.0	Ziploc bag	G0015	built_in		Mono	192000		Medium	Alkaline AA	32GB Sandisk Extreme		En área de sabana, en árboles adjuntos a cerca.	1.5		Temperature
Pasivo	RZUB09		Juan M. Daza, Claudia V. Isaza, Jose D. Lopez, Victor M. Martinez, Carolina Paniagua, Edison Ramirez, Daniel A. Rodriguez, Camilo Sanchez	Juan M. Daza, Claudia V. Isaza, Jose D. Lopez, Victor M. Martinez, Carolina Paniagua, Edison Ramirez, Daniel A. Rodriguez, Camilo Sanchez	juanm.daza@udea.edu.co, victoria.isaza@udea.edu.co, jdavid.lopez@udea.edu.co	Conservacion Biologica utilizando Inteligencia Artificial, Programa 852	Minciencias-UdeA-ITM-IAVH	Colombia	Meta	San Martin		Reserva Natural de la Sociedad Civil Rey Zamuro-Matarredonda	3.52698	-73.4079	Celular	Exacta	WGS84			2022	9	4	2022	9	12	Funcional	AudioMoth 1.2.0	Ziploc bag	G0086	built_in		Mono	192000		Medium	Alkaline AA	32GB Sandisk Extreme		En borde de pequeño fragmento de vegetación arbórea, apuntando a sabana.	1.5		Temperature
Pasivo	RZUB10		Juan M. Daza, Claudia V. Isaza, Jose D. Lopez, Victor M. Martinez, Carolina Paniagua, Edison Ramirez, Daniel A. Rodriguez, Camilo Sanchez	Juan M. Daza, Claudia V. Isaza, Jose D. Lopez, Victor M. Martinez, Carolina Paniagua, Edison Ramirez, Daniel A. Rodriguez, Camilo Sanchez	juanm.daza@udea.edu.co, victoria.isaza@udea.edu.co, jdavid.lopez@udea.edu.co	Conservacion Biologica utilizando Inteligencia Artificial, Programa 852	Minciencias-UdeA-ITM-IAVH	Colombia	Meta	San Martin		Reserva Natural de la Sociedad Civil Rey Zamuro-Matarredonda	3.52351	-73.4083	Celular	Exacta	WGS84			2022	9	4	2022	9	10	Mojada, dañada. Titilan ambos bombillos	AudioMoth 1.2.0	Ziploc bag	G0106	built_in		Mono	192000		Medium	Alkaline AA	32GB Sandisk Extreme		En interior de bosque, cercana a barranco (dando espaldas a éste).	1.5
Pasivo	RZUB11		Juan M. Daza, Claudia V. Isaza, Jose D. Lopez, Victor M. Martinez, Carolina Paniagua, Edison Ramirez, Daniel A. Rodriguez, Camilo Sanchez	Juan M. Daza, Claudia V. Isaza, Jose D. Lopez, Victor M. Martinez, Carolina Paniagua, Edison Ramirez, Daniel A. Rodriguez, Camilo Sanchez	juanm.daza@udea.edu.co, victoria.isaza@udea.edu.co, jdavid.lopez@udea.edu.co	Conservacion Biologica utilizando Inteligencia Artificial, Programa 852	Minciencias-UdeA-ITM-IAVH	Colombia	Meta	San Martin		Reserva Natural de la Sociedad Civil Rey Zamuro-Matarredonda	3.52039	-73.4076	Celular	Exacta	WGS84			2022	9	4	2022	9	12	Funcional	AudioMoth 1.2.0	Ziploc bag	G0093	built_in		Mono	192000		Medium	Alkaline AA	32GB Sandisk Extreme		En interior de bosque, cerca a pequeño arroyo.	1.5
Pasivo	RZUC01		Juan M. Daza, Claudia V. Isaza, Jose D. Lopez, Victor M. Martinez, Carolina Paniagua, Edison Ramirez, Daniel A. Rodriguez, Camilo Sanchez	Juan M. Daza, Claudia V. Isaza, Jose D. Lopez, Victor M. Martinez, Carolina Paniagua, Edison Ramirez, Daniel A. Rodriguez, Camilo Sanchez	juanm.daza@udea.edu.co, victoria.isaza@udea.edu.co, jdavid.lopez@udea.edu.co	Conservacion Biologica utilizando Inteligencia Artificial, Programa 852	Minciencias-UdeA-ITM-IAVH	Colombia	Meta	San Martin		Reserva Natural de la Sociedad Civil Rey Zamuro-Matarredonda	3.55566	-73.4047	Celular	Exacta	WGS84			2022	9	3	2022	9	11	Funcional	AudioMoth 1.2.0	Ziploc bag	G0065	built_in		Mono	192000		Medium	Alkaline AA	32GB Sandisk Extreme		En sabana, en cercanía a vegetación tipo rastrojo, y a cuerpo de agua usado por vacas.	1.5		Temperature
Pasivo	RZUC02		Juan M. Daza, Claudia V. Isaza, Jose D. Lopez, Victor M. Martinez, Carolina Paniagua, Edison Ramirez, Daniel A. Rodriguez, Camilo Sanchez	Juan M. Daza, Claudia V. Isaza, Jose D. Lopez, Victor M. Martinez, Carolina Paniagua, Edison Ramirez, Daniel A. Rodriguez, Camilo Sanchez	juanm.daza@udea.edu.co, victoria.isaza@udea.edu.co, jdavid.lopez@udea.edu.co	Conservacion Biologica utilizando Inteligencia Artificial, Programa 852	Minciencias-UdeA-ITM-IAVH	Colombia	Meta	San Martin		Reserva Natural de la Sociedad Civil Rey Zamuro-Matarredonda	3.55228	-73.4042	Celular	Exacta	WGS84			2022	9	3	2022	9	11	empapada. Bolsa con roto grande	AudioMoth 1.2.0	Ziploc bag	G0057	built_in		Mono	192000		Medium	Alkaline AA	32GB Sandisk Extreme		Ubicada en borde, apuntando al interior.	1.5		Temperature
Pasivo	RZUC03		Juan M. Daza, Claudia V. Isaza, Jose D. Lopez, Victor M. Martinez, Carolina Paniagua, Edison Ramirez, Daniel A. Rodriguez, Camilo Sanchez	Juan M. Daza, Claudia V. Isaza, Jose D. Lopez, Victor M. Martinez, Carolina Paniagua, Edison Ramirez, Daniel A. Rodriguez, Camilo Sanchez	juanm.daza@udea.edu.co, victoria.isaza@udea.edu.co, jdavid.lopez@udea.edu.co	Conservacion Biologica utilizando Inteligencia Artificial, Programa 852	Minciencias-UdeA-ITM-IAVH	Colombia	Meta	San Martin		Reserva Natural de la Sociedad Civil Rey Zamuro-Matarredonda	3.54867	-73.4045	Celular	Exacta	WGS84			2022	9	3	2022	9	11	Funcional	AudioMoth 1.2.0	Ziploc bag	G0085	built_in		Mono	192000		Medium	Alkaline AA	32GB Sandisk Extreme		Ubicada en bosque, cercana a claro.	1.5		Temperature
Pasivo	RZUC04a		Juan M. Daza, Claudia V. Isaza, Jose D. Lopez, Victor M. Martinez, Carolina Paniagua, Edison Ramirez, Daniel A. Rodriguez, Camilo Sanchez	Juan M. Daza, Claudia V. Isaza, Jose D. Lopez, Victor M. Martinez, Carolina Paniagua, Edison Ramirez, Daniel A. Rodriguez, Camilo Sanchez	juanm.daza@udea.edu.co, victoria.isaza@udea.edu.co, jdavid.lopez@udea.edu.co	Conservacion Biologica utilizando Inteligencia Artificial, Programa 852	Minciencias-UdeA-ITM-IAVH	Colombia	Meta	San Martin		Reserva Natural de la Sociedad Civil Rey Zamuro-Matarredonda	3.54489	-73.4042	Celular	Exacta	WGS84			2022	9	3	2022	9	14	Cambiada de sitio. Grabó muy poco	AudioMoth 1.0.0	Ziploc bag	G0004	built_in		Mono	192000		Medium	Alkaline AA	32GB Sandisk Extreme		En borde. Apuntando hacía sabana que se encuentra a 6m	1.5		Temperature
Pasivo	RZUC04b		Juan M. Daza, Claudia V. Isaza, Jose D. Lopez, Victor M. Martinez, Carolina Paniagua, Edison Ramirez, Daniel A. Rodriguez, Camilo Sanchez	Juan M. Daza, Claudia V. Isaza, Jose D. Lopez, Victor M. Martinez, Carolina Paniagua, Edison Ramirez, Daniel A. Rodriguez, Camilo Sanchez	juanm.daza@udea.edu.co, victoria.isaza@udea.edu.co, jdavid.lopez@udea.edu.co	Conservacion Biologica utilizando Inteligencia Artificial, Programa 852	Minciencias-UdeA-ITM-IAVH	Colombia	Meta	San Martin		Reserva Natural de la Sociedad Civil Rey Zamuro-Matarredonda	3.54505	-73.4042	Celular	Exacta	WGS84			2022	9	3	2022	9	14	Mojada, dañada. Titilan ambos bombillos	AudioMoth 1.0.0	Ziploc bag	G0004	built_in		Mono	192000		Medium	Alkaline AA	32GB Sandisk Extreme	Dañada	Reemplazada, Ubicada en interior de bosque.	1.5		Temperature
Pasivo	RZUC05		Juan M. Daza, Claudia V. Isaza, Jose D. Lopez, Victor M. Martinez, Carolina Paniagua, Edison Ramirez, Daniel A. Rodriguez, Camilo Sanchez	Juan M. Daza, Claudia V. Isaza, Jose D. Lopez, Victor M. Martinez, Carolina Paniagua, Edison Ramirez, Daniel A. Rodriguez, Camilo Sanchez	juanm.daza@udea.edu.co, victoria.isaza@udea.edu.co, jdavid.lopez@udea.edu.co	Conservacion Biologica utilizando Inteligencia Artificial, Programa 852	Minciencias-UdeA-ITM-IAVH	Colombia	Meta	San Martin		Reserva Natural de la Sociedad Civil Rey Zamuro-Matarredonda	3.54149	-73.4043	Celular	Exacta	WGS84			2022	9	3	2022	9	14	Funcional	AudioMoth 1.2.0	Ziploc bag	G0036	built_in		Mono	192000		Medium	Alkaline AA	32GB Sandisk Extreme		Ubicada en bosque, cerca a cuerpo de agua y con barranco atrás.	1.5		Temperature
Pasivo	RZUC06		Juan M. Daza, Claudia V. Isaza, Jose D. Lopez, Victor M. Martinez, Carolina Paniagua, Edison Ramirez, Daniel A. Rodriguez, Camilo Sanchez	Juan M. Daza, Claudia V. Isaza, Jose D. Lopez, Victor M. Martinez, Carolina Paniagua, Edison Ramirez, Daniel A. Rodriguez, Camilo Sanchez	juanm.daza@udea.edu.co, victoria.isaza@udea.edu.co, jdavid.lopez@udea.edu.co	Conservacion Biologica utilizando Inteligencia Artificial, Programa 852	Minciencias-UdeA-ITM-IAVH	Colombia	Meta	San Martin		Reserva Natural de la Sociedad Civil Rey Zamuro-Matarredonda	3.53771	-73.4043	Celular	Exacta	WGS84			2022	9	3	2022	9	13	Funcional	AudioMoth 1.2.0	Ziploc bag	G0037	built_in		Mono	192000		Medium	Alkaline AA	32GB Sandisk Extreme		Ubicada en bosque, apuntando a barranco no muy pronunciado.	1.5		Temperature
Pasivo	RZUC07		Juan M. Daza, Claudia V. Isaza, Jose D. Lopez, Victor M. Martinez, Carolina Paniagua, Edison Ramirez, Daniel A. Rodriguez, Camilo Sanchez	Juan M. Daza, Claudia V. Isaza, Jose D. Lopez, Victor M. Martinez, Carolina Paniagua, Edison Ramirez, Daniel A. Rodriguez, Camilo Sanchez	juanm.daza@udea.edu.co, victoria.isaza@udea.edu.co, jdavid.lopez@udea.edu.co	Conservacion Biologica utilizando Inteligencia Artificial, Programa 852	Minciencias-UdeA-ITM-IAVH	Colombia	Meta	San Martin		Reserva Natural de la Sociedad Civil Rey Zamuro-Matarredonda	3.53404	-73.4044	Celular	Exacta	WGS84			2022	9	5	2022	9	13	Funcional	AudioMoth 1.2.0	Ziploc bag	G0072	built_in		Mono	192000		Medium	Alkaline AA	32GB Sandisk Extreme		Ubicada en borde, con barranco atrás.	1.5		Temperature
Pasivo	RZUC08		Juan M. Daza, Claudia V. Isaza, Jose D. Lopez, Victor M. Martinez, Carolina Paniagua, Edison Ramirez, Daniel A. Rodriguez, Camilo Sanchez	Juan M. Daza, Claudia V. Isaza, Jose D. Lopez, Victor M. Martinez, Carolina Paniagua, Edison Ramirez, Daniel A. Rodriguez, Camilo Sanchez	juanm.daza@udea.edu.co, victoria.isaza@udea.edu.co, jdavid.lopez@udea.edu.co	Conservacion Biologica utilizando Inteligencia Artificial, Programa 852	Minciencias-UdeA-ITM-IAVH	Colombia	Meta	San Martin		Reserva Natural de la Sociedad Civil Rey Zamuro-Matarredonda	3.53067	-73.4043	Celular	Exacta	WGS84			2022	9	4	2022	9	12	Funcional	AudioMoth 1.2.0	Ziploc bag	G0089	built_in		Mono	192000		Medium	Alkaline AA	32GB Sandisk Extreme		Potrero sin usar, hábitat en recuperación.	1.5		Temperature
Pasivo	RZUC09		Juan M. Daza, Claudia V. Isaza, Jose D. Lopez, Victor M. Martinez, Carolina Paniagua, Edison Ramirez, Daniel A. Rodriguez, Camilo Sanchez	Juan M. Daza, Claudia V. Isaza, Jose D. Lopez, Victor M. Martinez, Carolina Paniagua, Edison Ramirez, Daniel A. Rodriguez, Camilo Sanchez	juanm.daza@udea.edu.co, victoria.isaza@udea.edu.co, jdavid.lopez@udea.edu.co	Conservacion Biologica utilizando Inteligencia Artificial, Programa 852	Minciencias-UdeA-ITM-IAVH	Colombia	Meta	San Martin		Reserva Natural de la Sociedad Civil Rey Zamuro-Matarredonda	3.52693	-73.4042	Celular	Exacta	WGS84			2022	9	4	2022	9	12	Funcional	AudioMoth 1.2.0	Ziploc bag	G0087	built_in		Mono	192000		Medium	Alkaline AA	32GB Sandisk Extreme		Ubicada en bosque.	1.5		Temperature
Pasivo	RZUC10		Juan M. Daza, Claudia V. Isaza, Jose D. Lopez, Victor M. Martinez, Carolina Paniagua, Edison Ramirez, Daniel A. Rodriguez, Camilo Sanchez	Juan M. Daza, Claudia V. Isaza, Jose D. Lopez, Victor M. Martinez, Carolina Paniagua, Edison Ramirez, Daniel A. Rodriguez, Camilo Sanchez	juanm.daza@udea.edu.co, victoria.isaza@udea.edu.co, jdavid.lopez@udea.edu.co	Conservacion Biologica utilizando Inteligencia Artificial, Programa 852	Minciencias-UdeA-ITM-IAVH	Colombia	Meta	San Martin		Reserva Natural de la Sociedad Civil Rey Zamuro-Matarredonda	3.52348	-73.4041	Celular	Exacta	WGS84			2022	9	4	2022	9	12	alumbra verde y rojo, alta, humeda	AudioMoth 1.2.0	Ziploc bag	G0035	built_in		Mono	192000		Medium	Alkaline AA	32GB Sandisk Extreme		Ubicada en bosque, en área con pequeño humedal, y cercana a claro	1.5		Temperature
Pasivo	RZUC11		Juan M. Daza, Claudia V. Isaza, Jose D. Lopez, Victor M. Martinez, Carolina Paniagua, Edison Ramirez, Daniel A. Rodriguez, Camilo Sanchez	Juan M. Daza, Claudia V. Isaza, Jose D. Lopez, Victor M. Martinez, Carolina Paniagua, Edison Ramirez, Daniel A. Rodriguez, Camilo Sanchez	juanm.daza@udea.edu.co, victoria.isaza@udea.edu.co, jdavid.lopez@udea.edu.co	Conservacion Biologica utilizando Inteligencia Artificial, Programa 852	Minciencias-UdeA-ITM-IAVH	Colombia	Meta	San Martin		Reserva Natural de la Sociedad Civil Rey Zamuro-Matarredonda	3.51974	-73.4044	Celular	Exacta	WGS84			2022	9	4	2022	9	12	Funcional	AudioMoth 1.2.0	Ziploc bag	G0102	built_in		Mono	192000		Medium	Alkaline AA	32GB Sandisk Extreme		Ubicada en sabana en medio de parches de bosque, de espaldas a poniente	1.5
Pasivo	RZUC12		Juan M. Daza, Claudia V. Isaza, Jose D. Lopez, Victor M. Martinez, Carolina Paniagua, Edison Ramirez, Daniel A. Rodriguez, Camilo Sanchez	Juan M. Daza, Claudia V. Isaza, Jose D. Lopez, Victor M. Martinez, Carolina Paniagua, Edison Ramirez, Daniel A. Rodriguez, Camilo Sanchez	juanm.daza@udea.edu.co, victoria.isaza@udea.edu.co, jdavid.lopez@udea.edu.co	Conservacion Biologica utilizando Inteligencia Artificial, Programa 852	Minciencias-UdeA-ITM-IAVH	Colombia	Meta	San Martin		Reserva Natural de la Sociedad Civil Rey Zamuro-Matarredonda	3.51582	-73.4046	Celular	Exacta	WGS84			2022	9	4	2022	9	12	Funcional	AudioMoth 1.2.0	Ziploc bag	G0048	built_in		Mono	192000		Medium	Alkaline AA	32GB Sandisk Extreme		Ubicada en bosque, dando espalda a barranco y tras barranco, presencia de claro.	1.5
Pasivo	RZUD01		Juan M. Daza, Claudia V. Isaza, Jose D. Lopez, Victor M. Martinez, Carolina Paniagua, Edison Ramirez, Daniel A. Rodriguez, Camilo Sanchez	Juan M. Daza, Claudia V. Isaza, Jose D. Lopez, Victor M. Martinez, Carolina Paniagua, Edison Ramirez, Daniel A. Rodriguez, Camilo Sanchez	juanm.daza@udea.edu.co, victoria.isaza@udea.edu.co, jdavid.lopez@udea.edu.co	Conservacion Biologica utilizando Inteligencia Artificial, Programa 852	Minciencias-UdeA-ITM-IAVH	Colombia	Meta	San Martin		Reserva Natural de la Sociedad Civil Rey Zamuro-Matarredonda	3.55573	-73.4007	Celular	Exacta	WGS84			2022	9	3	2022	9	11	Tildó al apagarse. Húmeda	AudioMoth 1.1.0	Ziploc bag	G0025	built_in		Mono	192000		Medium	Alkaline AA	32GB Sandisk Extreme		Bosque	1.5		Temperature
Pasivo	RZUD02		Juan M. Daza, Claudia V. Isaza, Jose D. Lopez, Victor M. Martinez, Carolina Paniagua, Edison Ramirez, Daniel A. Rodriguez, Camilo Sanchez	Juan M. Daza, Claudia V. Isaza, Jose D. Lopez, Victor M. Martinez, Carolina Paniagua, Edison Ramirez, Daniel A. Rodriguez, Camilo Sanchez	juanm.daza@udea.edu.co, victoria.isaza@udea.edu.co, jdavid.lopez@udea.edu.co	Conservacion Biologica utilizando Inteligencia Artificial, Programa 852	Minciencias-UdeA-ITM-IAVH	Colombia	Meta	San Martin		Reserva Natural de la Sociedad Civil Rey Zamuro-Matarredonda	3.55261	-73.4007	Celular	Exacta	WGS84			2022	9	3	2022	9	11	Funcional	AudioMoth 1.2.0	Ziploc bag	G0034	built_in		Mono	192000		Medium	Alkaline AA	32GB Sandisk Extreme		En sabana	1.5		Temperature
Pasivo	RZUD03		Juan M. Daza, Claudia V. Isaza, Jose D. Lopez, Victor M. Martinez, Carolina Paniagua, Edison Ramirez, Daniel A. Rodriguez, Camilo Sanchez	Juan M. Daza, Claudia V. Isaza, Jose D. Lopez, Victor M. Martinez, Carolina Paniagua, Edison Ramirez, Daniel A. Rodriguez, Camilo Sanchez	juanm.daza@udea.edu.co, victoria.isaza@udea.edu.co, jdavid.lopez@udea.edu.co	Conservacion Biologica utilizando Inteligencia Artificial, Programa 852	Minciencias-UdeA-ITM-IAVH	Colombia	Meta	San Martin		Reserva Natural de la Sociedad Civil Rey Zamuro-Matarredonda	3.54848	-73.4009	Celular	Exacta	WGS84			2022	9	3	2022	9	11	Funcional	AudioMoth 1.2.0	Ziploc bag	G0068	built_in		Mono	192000		Medium	Alkaline AA	32GB Sandisk Extreme		En parche, en borde y apuntando a sabana	1.5		Temperature
Pasivo	RZUD04		Juan M. Daza, Claudia V. Isaza, Jose D. Lopez, Victor M. Martinez, Carolina Paniagua, Edison Ramirez, Daniel A. Rodriguez, Camilo Sanchez	Juan M. Daza, Claudia V. Isaza, Jose D. Lopez, Victor M. Martinez, Carolina Paniagua, Edison Ramirez, Daniel A. Rodriguez, Camilo Sanchez	juanm.daza@udea.edu.co, victoria.isaza@udea.edu.co, jdavid.lopez@udea.edu.co	Conservacion Biologica utilizando Inteligencia Artificial, Programa 852	Minciencias-UdeA-ITM-IAVH	Colombia	Meta	San Martin		Reserva Natural de la Sociedad Civil Rey Zamuro-Matarredonda	3.54498	-73.4008	Celular	Exacta	WGS84			2022	9	3	2022	9	13	Funcional	AudioMoth 1.1.0	Ziploc bag	G0026	built_in		Mono	192000		Medium	Alkaline AA	32GB Sandisk Extreme		Bosque	1.5		Temperature
Pasivo	RZUD05		Juan M. Daza, Claudia V. Isaza, Jose D. Lopez, Victor M. Martinez, Carolina Paniagua, Edison Ramirez, Daniel A. Rodriguez, Camilo Sanchez	Juan M. Daza, Claudia V. Isaza, Jose D. Lopez, Victor M. Martinez, Carolina Paniagua, Edison Ramirez, Daniel A. Rodriguez, Camilo Sanchez	juanm.daza@udea.edu.co, victoria.isaza@udea.edu.co, jdavid.lopez@udea.edu.co	Conservacion Biologica utilizando Inteligencia Artificial, Programa 852	Minciencias-UdeA-ITM-IAVH	Colombia	Meta	San Martin		Reserva Natural de la Sociedad Civil Rey Zamuro-Matarredonda	3.54138	-73.4014	Celular	Exacta	WGS84			2022	9	3	2022	9	13	Con agua adentro, dos leds prendidos	AudioMoth 1.2.0	Ziploc bag	G0062	built_in		Mono	192000		Medium	Alkaline AA	32GB Sandisk Extreme		Pastizal (en corredor de √°rboles )	1.5		Temperature
Pasivo	RZUD06		Juan M. Daza, Claudia V. Isaza, Jose D. Lopez, Victor M. Martinez, Carolina Paniagua, Edison Ramirez, Daniel A. Rodriguez, Camilo Sanchez	Juan M. Daza, Claudia V. Isaza, Jose D. Lopez, Victor M. Martinez, Carolina Paniagua, Edison Ramirez, Daniel A. Rodriguez, Camilo Sanchez	juanm.daza@udea.edu.co, victoria.isaza@udea.edu.co, jdavid.lopez@udea.edu.co	Conservacion Biologica utilizando Inteligencia Artificial, Programa 852	Minciencias-UdeA-ITM-IAVH	Colombia	Meta	San Martin		Reserva Natural de la Sociedad Civil Rey Zamuro-Matarredonda	3.53416	-73.4008	Celular	Exacta	WGS84			2022	9	5	2022	9	13	Funcional	AudioMoth 1.2.0	Ziploc bag	G0059	built_in		Mono	192000		Medium	Alkaline AA	32GB Sandisk Extreme		Bosque, cercano a sabana y barranco.	1.5		Temperature
Pasivo	RZUD07		Juan M. Daza, Claudia V. Isaza, Jose D. Lopez, Victor M. Martinez, Carolina Paniagua, Edison Ramirez, Daniel A. Rodriguez, Camilo Sanchez	Juan M. Daza, Claudia V. Isaza, Jose D. Lopez, Victor M. Martinez, Carolina Paniagua, Edison Ramirez, Daniel A. Rodriguez, Camilo Sanchez	juanm.daza@udea.edu.co, victoria.isaza@udea.edu.co, jdavid.lopez@udea.edu.co	Conservacion Biologica utilizando Inteligencia Artificial, Programa 852	Minciencias-UdeA-ITM-IAVH	Colombia	Meta	San Martin		Reserva Natural de la Sociedad Civil Rey Zamuro-Matarredonda	3.53417	-73.4007	Celular	Exacta	WGS84			2022	9	5	2022	9	12	Funcional	RZUD07	Ziploc bag	G0063	built_in		Mono	192000		Medium	Alkaline AA	32GB Sandisk Extreme		En bosque, cercana a sabana	1.5
Pasivo	RZUD08		Juan M. Daza, Claudia V. Isaza, Jose D. Lopez, Victor M. Martinez, Carolina Paniagua, Edison Ramirez, Daniel A. Rodriguez, Camilo Sanchez	Juan M. Daza, Claudia V. Isaza, Jose D. Lopez, Victor M. Martinez, Carolina Paniagua, Edison Ramirez, Daniel A. Rodriguez, Camilo Sanchez	juanm.daza@udea.edu.co, victoria.isaza@udea.edu.co, jdavid.lopez@udea.edu.co	Conservacion Biologica utilizando Inteligencia Artificial, Programa 852	Minciencias-UdeA-ITM-IAVH	Colombia	Meta	San Martin		Reserva Natural de la Sociedad Civil Rey Zamuro-Matarredonda	3.53034	-73.4009	Celular	Exacta	WGS84			2022	9	4	2022	9	12	Funcional	AudioMoth 1.1.0	Ziploc bag	G0021	built_in		Mono	192000		Medium	Alkaline AA	32GB Sandisk Extreme		En borde de bosque, apuntando a sabana	1.5		Temperature
Pasivo	RZUD09		Juan M. Daza, Claudia V. Isaza, Jose D. Lopez, Victor M. Martinez, Carolina Paniagua, Edison Ramirez, Daniel A. Rodriguez, Camilo Sanchez	Juan M. Daza, Claudia V. Isaza, Jose D. Lopez, Victor M. Martinez, Carolina Paniagua, Edison Ramirez, Daniel A. Rodriguez, Camilo Sanchez	juanm.daza@udea.edu.co, victoria.isaza@udea.edu.co, jdavid.lopez@udea.edu.co	Conservacion Biologica utilizando Inteligencia Artificial, Programa 852	Minciencias-UdeA-ITM-IAVH	Colombia	Meta	San Martin		Reserva Natural de la Sociedad Civil Rey Zamuro-Matarredonda	3.52693	-73.4008	Celular	Exacta	WGS84			2022	9	4	2022	9	12	Funcional	AudioMoth 1.2.0	Ziploc bag	G0084	built_in		Mono	192000		Medium	Alkaline AA	32GB Sandisk Extreme		Interior de bosque	1.5		Temperature
Pasivo	RZUD10		Juan M. Daza, Claudia V. Isaza, Jose D. Lopez, Victor M. Martinez, Carolina Paniagua, Edison Ramirez, Daniel A. Rodriguez, Camilo Sanchez	Juan M. Daza, Claudia V. Isaza, Jose D. Lopez, Victor M. Martinez, Carolina Paniagua, Edison Ramirez, Daniel A. Rodriguez, Camilo Sanchez	juanm.daza@udea.edu.co, victoria.isaza@udea.edu.co, jdavid.lopez@udea.edu.co	Conservacion Biologica utilizando Inteligencia Artificial, Programa 852	Minciencias-UdeA-ITM-IAVH	Colombia	Meta	San Martin		Reserva Natural de la Sociedad Civil Rey Zamuro-Matarredonda	3.52316	-73.4007	Celular	Exacta	WGS84			2022	9	4	2022	9	12	Funcional	AudioMoth 1.2.0	Ziploc bag	G0077	built_in		Mono	192000		Medium	Alkaline AA	32GB Sandisk Extreme		En parche, en borde y apuntando a sabana	1.5		Temperature
Pasivo	RZUD11		Juan M. Daza, Claudia V. Isaza, Jose D. Lopez, Victor M. Martinez, Carolina Paniagua, Edison Ramirez, Daniel A. Rodriguez, Camilo Sanchez	Juan M. Daza, Claudia V. Isaza, Jose D. Lopez, Victor M. Martinez, Carolina Paniagua, Edison Ramirez, Daniel A. Rodriguez, Camilo Sanchez	juanm.daza@udea.edu.co, victoria.isaza@udea.edu.co, jdavid.lopez@udea.edu.co	Conservacion Biologica utilizando Inteligencia Artificial, Programa 852	Minciencias-UdeA-ITM-IAVH	Colombia	Meta	San Martin		Reserva Natural de la Sociedad Civil Rey Zamuro-Matarredonda	3.51992	-73.4008	Celular	Exacta	WGS84			2022	9	4	2022	9	12	perfectas condiciones alumbra verde. cuando llegue a la casa y ma saque de la bolsa SD salida	AudioMoth 1.2.0	Ziploc bag	G0105	built_in		Mono	192000		Medium	Alkaline AA	32GB Sandisk Extreme		En parche, en borde y apuntando a sabana	1.5		Temperature
Pasivo	RZUD12		Juan M. Daza, Claudia V. Isaza, Jose D. Lopez, Victor M. Martinez, Carolina Paniagua, Edison Ramirez, Daniel A. Rodriguez, Camilo Sanchez	Juan M. Daza, Claudia V. Isaza, Jose D. Lopez, Victor M. Martinez, Carolina Paniagua, Edison Ramirez, Daniel A. Rodriguez, Camilo Sanchez	juanm.daza@udea.edu.co, victoria.isaza@udea.edu.co, jdavid.lopez@udea.edu.co	Conservacion Biologica utilizando Inteligencia Artificial, Programa 852	Minciencias-UdeA-ITM-IAVH	Colombia	Meta	San Martin		Reserva Natural de la Sociedad Civil Rey Zamuro-Matarredonda	3.51605	-73.4008	Celular	Exacta	WGS84			2022	9	4	2022	9	12	Funcional	AudioMoth 1.2.0	Ziploc bag	G0043	built_in		Mono	192000		Medium	Alkaline AA	32GB Sandisk Extreme		Bosque - palmeras	1.5		Temperature
Pasivo	RZUD13		Juan M. Daza, Claudia V. Isaza, Jose D. Lopez, Victor M. Martinez, Carolina Paniagua, Edison Ramirez, Daniel A. Rodriguez, Camilo Sanchez	Juan M. Daza, Claudia V. Isaza, Jose D. Lopez, Victor M. Martinez, Carolina Paniagua, Edison Ramirez, Daniel A. Rodriguez, Camilo Sanchez	juanm.daza@udea.edu.co, victoria.isaza@udea.edu.co, jdavid.lopez@udea.edu.co	Conservacion Biologica utilizando Inteligencia Artificial, Programa 852	Minciencias-UdeA-ITM-IAVH	Colombia	Meta	San Martin		Reserva Natural de la Sociedad Civil Rey Zamuro-Matarredonda	3.51251	-73.4008	Celular	Exacta	WGS84			2022	9	4	2022	9	12	Funcional	AudioMoth 1.2.0	Ziploc bag	G0083	built_in		Mono	192000		Medium	Alkaline AA	32GB Sandisk Extreme		Al interior de fragmento, en borde. Cercano a sabana	1.5
Pasivo	RZUE01		Juan M. Daza, Claudia V. Isaza, Jose D. Lopez, Victor M. Martinez, Carolina Paniagua, Edison Ramirez, Daniel A. Rodriguez, Camilo Sanchez	Juan M. Daza, Claudia V. Isaza, Jose D. Lopez, Victor M. Martinez, Carolina Paniagua, Edison Ramirez, Daniel A. Rodriguez, Camilo Sanchez	juanm.daza@udea.edu.co, victoria.isaza@udea.edu.co, jdavid.lopez@udea.edu.co	Conservacion Biologica utilizando Inteligencia Artificial, Programa 852	Minciencias-UdeA-ITM-IAVH	Colombia	Meta	San Martin		Reserva Natural de la Sociedad Civil Rey Zamuro-Matarredonda	3.55613	-73.3973	Celular	Exacta	WGS84			2022	9	3	2022	9	11	Funcional	AudioMoth 1.0.0	Ziploc bag	G0011	built_in		Mono	192000		Medium	Alkaline AA	32GB Sandisk Extreme		En bosque, cercano a cuerpo de agua	1.5		Temperature
Pasivo	RZUE02		Juan M. Daza, Claudia V. Isaza, Jose D. Lopez, Victor M. Martinez, Carolina Paniagua, Edison Ramirez, Daniel A. Rodriguez, Camilo Sanchez	Juan M. Daza, Claudia V. Isaza, Jose D. Lopez, Victor M. Martinez, Carolina Paniagua, Edison Ramirez, Daniel A. Rodriguez, Camilo Sanchez	juanm.daza@udea.edu.co, victoria.isaza@udea.edu.co, jdavid.lopez@udea.edu.co	Conservacion Biologica utilizando Inteligencia Artificial, Programa 852	Minciencias-UdeA-ITM-IAVH	Colombia	Meta	San Martin		Reserva Natural de la Sociedad Civil Rey Zamuro-Matarredonda	3.5522	-73.3975	Celular	Exacta	WGS84			2022	9	3	2022	9	11	Funcional	AudioMoth 1.1.0	Ziploc bag	G0016	built_in		Mono	192000		Medium	Alkaline AA	32GB Sandisk Extreme		En bosque	1.5		Temperature
Pasivo	RZUE03		Juan M. Daza, Claudia V. Isaza, Jose D. Lopez, Victor M. Martinez, Carolina Paniagua, Edison Ramirez, Daniel A. Rodriguez, Camilo Sanchez	Juan M. Daza, Claudia V. Isaza, Jose D. Lopez, Victor M. Martinez, Carolina Paniagua, Edison Ramirez, Daniel A. Rodriguez, Camilo Sanchez	juanm.daza@udea.edu.co, victoria.isaza@udea.edu.co, jdavid.lopez@udea.edu.co	Conservacion Biologica utilizando Inteligencia Artificial, Programa 852	Minciencias-UdeA-ITM-IAVH	Colombia	Meta	San Martin		Reserva Natural de la Sociedad Civil Rey Zamuro-Matarredonda	3.54871	-73.3972	Celular	Exacta	WGS84			2022	9	3	2022	9	11	Funcional	AudioMoth 1.2.0	Ziploc bag	G0073	built_in		Mono	192000		Medium	Alkaline AA	32GB Sandisk Extreme		En rama, en sabana.	1.5		Temperature
Pasivo	RZUE04		Juan M. Daza, Claudia V. Isaza, Jose D. Lopez, Victor M. Martinez, Carolina Paniagua, Edison Ramirez, Daniel A. Rodriguez, Camilo Sanchez	Juan M. Daza, Claudia V. Isaza, Jose D. Lopez, Victor M. Martinez, Carolina Paniagua, Edison Ramirez, Daniel A. Rodriguez, Camilo Sanchez	juanm.daza@udea.edu.co, victoria.isaza@udea.edu.co, jdavid.lopez@udea.edu.co	Conservacion Biologica utilizando Inteligencia Artificial, Programa 852	Minciencias-UdeA-ITM-IAVH	Colombia	Meta	San Martin		Reserva Natural de la Sociedad Civil Rey Zamuro-Matarredonda	3.54499	-73.3972	Celular	Exacta	WGS84			2022	9	3	2022	9	13	Muy afectada por el agua	AudioMoth 1.2.0	Ziploc bag	G0040	built_in		Mono	192000		Medium	Alkaline AA	32GB Sandisk Extreme		En bosque	1.5		Temperature
Pasivo	RZUE05		Juan M. Daza, Claudia V. Isaza, Jose D. Lopez, Victor M. Martinez, Carolina Paniagua, Edison Ramirez, Daniel A. Rodriguez, Camilo Sanchez	Juan M. Daza, Claudia V. Isaza, Jose D. Lopez, Victor M. Martinez, Carolina Paniagua, Edison Ramirez, Daniel A. Rodriguez, Camilo Sanchez	juanm.daza@udea.edu.co, victoria.isaza@udea.edu.co, jdavid.lopez@udea.edu.co	Conservacion Biologica utilizando Inteligencia Artificial, Programa 852	Minciencias-UdeA-ITM-IAVH	Colombia	Meta	San Martin		Reserva Natural de la Sociedad Civil Rey Zamuro-Matarredonda	3.54172	-73.397	Celular	Exacta	WGS84			2022	9	3	2022	9	13	Funcinoal. Pilas al poniente	AudioMoth 1.0.0	Ziploc bag	G0013	built_in		Mono	192000		Medium	Alkaline AA	32GB Sandisk Extreme		Pastizal	1.5		Temperature
Pasivo	RZUE06		Juan M. Daza, Claudia V. Isaza, Jose D. Lopez, Victor M. Martinez, Carolina Paniagua, Edison Ramirez, Daniel A. Rodriguez, Camilo Sanchez	Juan M. Daza, Claudia V. Isaza, Jose D. Lopez, Victor M. Martinez, Carolina Paniagua, Edison Ramirez, Daniel A. Rodriguez, Camilo Sanchez	juanm.daza@udea.edu.co, victoria.isaza@udea.edu.co, jdavid.lopez@udea.edu.co	Conservacion Biologica utilizando Inteligencia Artificial, Programa 852	Minciencias-UdeA-ITM-IAVH	Colombia	Meta	San Martin		Reserva Natural de la Sociedad Civil Rey Zamuro-Matarredonda	3.53764	-73.3973	Celular	Exacta	WGS84			2022	9	5	2022	9	13	Funcional	AudioMoth 1.2.0	Ziploc bag	G0090	built_in		Mono	192000		Medium	Alkaline AA	32GB Sandisk Extreme		Pastizal	1.5		Temperature
Pasivo	RZUE07		Juan M. Daza, Claudia V. Isaza, Jose D. Lopez, Victor M. Martinez, Carolina Paniagua, Edison Ramirez, Daniel A. Rodriguez, Camilo Sanchez	Juan M. Daza, Claudia V. Isaza, Jose D. Lopez, Victor M. Martinez, Carolina Paniagua, Edison Ramirez, Daniel A. Rodriguez, Camilo Sanchez	juanm.daza@udea.edu.co, victoria.isaza@udea.edu.co, jdavid.lopez@udea.edu.co	Conservacion Biologica utilizando Inteligencia Artificial, Programa 852	Minciencias-UdeA-ITM-IAVH	Colombia	Meta	San Martin		Reserva Natural de la Sociedad Civil Rey Zamuro-Matarredonda	3.53426	-73.3972	Celular	Exacta	WGS84			2022	9	4	2022	9	12	Parecía en perfectas condiciones, pero sus datos tuvieron que ser rescatados en Linux	AudioMoth 1.2.0	Ziploc bag	G0045	built_in		Mono	192000		Medium	Alkaline AA	32GB Sandisk Extreme		En sabana	1.5		Temperature
Pasivo	RZUE08		Juan M. Daza, Claudia V. Isaza, Jose D. Lopez, Victor M. Martinez, Carolina Paniagua, Edison Ramirez, Daniel A. Rodriguez, Camilo Sanchez	Juan M. Daza, Claudia V. Isaza, Jose D. Lopez, Victor M. Martinez, Carolina Paniagua, Edison Ramirez, Daniel A. Rodriguez, Camilo Sanchez	juanm.daza@udea.edu.co, victoria.isaza@udea.edu.co, jdavid.lopez@udea.edu.co	Conservacion Biologica utilizando Inteligencia Artificial, Programa 852	Minciencias-UdeA-ITM-IAVH	Colombia	Meta	San Martin		Reserva Natural de la Sociedad Civil Rey Zamuro-Matarredonda	3.53027	-73.3973	Celular	Exacta	WGS84			2022	9	5	2022	9	13	Funcional	AudioMoth 1.2.0	Ziploc bag	G0039	built_in		Mono	192000		Medium	Alkaline AA	32GB Sandisk Extreme		En sabana	1.5
Pasivo	RZUE09		Juan M. Daza, Claudia V. Isaza, Jose D. Lopez, Victor M. Martinez, Carolina Paniagua, Edison Ramirez, Daniel A. Rodriguez, Camilo Sanchez	Juan M. Daza, Claudia V. Isaza, Jose D. Lopez, Victor M. Martinez, Carolina Paniagua, Edison Ramirez, Daniel A. Rodriguez, Camilo Sanchez	juanm.daza@udea.edu.co, victoria.isaza@udea.edu.co, jdavid.lopez@udea.edu.co	Conservacion Biologica utilizando Inteligencia Artificial, Programa 852	Minciencias-UdeA-ITM-IAVH	Colombia	Meta	San Martin		Reserva Natural de la Sociedad Civil Rey Zamuro-Matarredonda	3.527	-73.397	Celular	Exacta	WGS84			2022	9	5	2022	9	13	Funcional	AudioMoth 1.0.0	Ziploc bag	G0097	built_in		Mono	192000		Medium	Alkaline AA	32GB Sandisk Extreme		En borde de bosque, apuntando a sabana	1.5		Temperature
Pasivo	RZUE10		Juan M. Daza, Claudia V. Isaza, Jose D. Lopez, Victor M. Martinez, Carolina Paniagua, Edison Ramirez, Daniel A. Rodriguez, Camilo Sanchez	Juan M. Daza, Claudia V. Isaza, Jose D. Lopez, Victor M. Martinez, Carolina Paniagua, Edison Ramirez, Daniel A. Rodriguez, Camilo Sanchez	juanm.daza@udea.edu.co, victoria.isaza@udea.edu.co, jdavid.lopez@udea.edu.co	Conservacion Biologica utilizando Inteligencia Artificial, Programa 852	Minciencias-UdeA-ITM-IAVH	Colombia	Meta	San Martin		Reserva Natural de la Sociedad Civil Rey Zamuro-Matarredonda	3.52317	-73.3971	Celular	Exacta	WGS84			2022	9	4	2022	9	12	Funcional	AudioMoth 1.2.0	Ziploc bag	G0033	built_in		Mono	192000		Medium	Alkaline AA	32GB Sandisk Extreme		En bosque, en filo	1.5		Temperature
Pasivo	RZUE11		Juan M. Daza, Claudia V. Isaza, Jose D. Lopez, Victor M. Martinez, Carolina Paniagua, Edison Ramirez, Daniel A. Rodriguez, Camilo Sanchez	Juan M. Daza, Claudia V. Isaza, Jose D. Lopez, Victor M. Martinez, Carolina Paniagua, Edison Ramirez, Daniel A. Rodriguez, Camilo Sanchez	juanm.daza@udea.edu.co, victoria.isaza@udea.edu.co, jdavid.lopez@udea.edu.co	Conservacion Biologica utilizando Inteligencia Artificial, Programa 852	Minciencias-UdeA-ITM-IAVH	Colombia	Meta	San Martin		Reserva Natural de la Sociedad Civil Rey Zamuro-Matarredonda	3.51997	-73.3972	Celular	Exacta	WGS84			2022	9	4	2022	9	12	Funcional	AudioMoth 1.2.0	Ziploc bag	G0051	built_in		Mono	192000		Medium	Alkaline AA	32GB Sandisk Extreme		En sabana, cercano a parches de bosque	1.5		Temperature
Pasivo	RZUE12		Juan M. Daza, Claudia V. Isaza, Jose D. Lopez, Victor M. Martinez, Carolina Paniagua, Edison Ramirez, Daniel A. Rodriguez, Camilo Sanchez	Juan M. Daza, Claudia V. Isaza, Jose D. Lopez, Victor M. Martinez, Carolina Paniagua, Edison Ramirez, Daniel A. Rodriguez, Camilo Sanchez	juanm.daza@udea.edu.co, victoria.isaza@udea.edu.co, jdavid.lopez@udea.edu.co	Conservacion Biologica utilizando Inteligencia Artificial, Programa 852	Minciencias-UdeA-ITM-IAVH	Colombia	Meta	San Martin		Reserva Natural de la Sociedad Civil Rey Zamuro-Matarredonda	3.51603	-73.3972	Celular	Exacta	WGS84			2022	9	4	2022	9	12	Funcional	AudioMoth 1.2.0	Ziploc bag	G0054	built_in		Mono	192000		Medium	Alkaline AA	32GB Sandisk Extreme		En bosque con palmeras	1.5		Temperature
Pasivo	RZUE13		Juan M. Daza, Claudia V. Isaza, Jose D. Lopez, Victor M. Martinez, Carolina Paniagua, Edison Ramirez, Daniel A. Rodriguez, Camilo Sanchez	Juan M. Daza, Claudia V. Isaza, Jose D. Lopez, Victor M. Martinez, Carolina Paniagua, Edison Ramirez, Daniel A. Rodriguez, Camilo Sanchez	juanm.daza@udea.edu.co, victoria.isaza@udea.edu.co, jdavid.lopez@udea.edu.co	Conservacion Biologica utilizando Inteligencia Artificial, Programa 852	Minciencias-UdeA-ITM-IAVH	Colombia	Meta	San Martin		Reserva Natural de la Sociedad Civil Rey Zamuro-Matarredonda	3.51234	-73.397	Celular	Exacta	WGS84			2022	9	4	2022	9	12	Funcional	AudioMoth 1.2.0	Ziploc bag	G0067	built_in		Mono	192000		Medium	Alkaline AA	32GB Sandisk Extreme		En tronco de árbol en medio de sabana	1.5
Pasivo	RZUF02		Juan M. Daza, Claudia V. Isaza, Jose D. Lopez, Victor M. Martinez, Carolina Paniagua, Edison Ramirez, Daniel A. Rodriguez, Camilo Sanchez	Juan M. Daza, Claudia V. Isaza, Jose D. Lopez, Victor M. Martinez, Carolina Paniagua, Edison Ramirez, Daniel A. Rodriguez, Camilo Sanchez	juanm.daza@udea.edu.co, victoria.isaza@udea.edu.co, jdavid.lopez@udea.edu.co	Conservacion Biologica utilizando Inteligencia Artificial, Programa 852	Minciencias-UdeA-ITM-IAVH	Colombia	Meta	San Martin		Reserva Natural de la Sociedad Civil Rey Zamuro-Matarredonda	3.55243	-73.3936	Celular	Exacta	WGS84			2022	9	3	2022	9	11	Funcional	AudioMoth 1.0.0	Ziploc bag	G0006	built_in		Mono	192000		Medium	Alkaline AA	32GB Sandisk Extreme		En borde de bosque, apuntando a sabana	1.5		Temperature
Pasivo	RZUF03		Juan M. Daza, Claudia V. Isaza, Jose D. Lopez, Victor M. Martinez, Carolina Paniagua, Edison Ramirez, Daniel A. Rodriguez, Camilo Sanchez	Juan M. Daza, Claudia V. Isaza, Jose D. Lopez, Victor M. Martinez, Carolina Paniagua, Edison Ramirez, Daniel A. Rodriguez, Camilo Sanchez	juanm.daza@udea.edu.co, victoria.isaza@udea.edu.co, jdavid.lopez@udea.edu.co	Conservacion Biologica utilizando Inteligencia Artificial, Programa 852	Minciencias-UdeA-ITM-IAVH	Colombia	Meta	San Martin		Reserva Natural de la Sociedad Civil Rey Zamuro-Matarredonda	3.54896	-73.3936	Celular	Exacta	WGS84			2022	9	3	2022	9	11	Funcional	AudioMoth 1.2.0	Ziploc bag	G0032	built_in		Mono	192000		Medium	Alkaline AA	32GB Sandisk Extreme		En tronco pequeño, aislado. En Sabana	1.5		Temperature
Pasivo	RZUF04		Juan M. Daza, Claudia V. Isaza, Jose D. Lopez, Victor M. Martinez, Carolina Paniagua, Edison Ramirez, Daniel A. Rodriguez, Camilo Sanchez	Juan M. Daza, Claudia V. Isaza, Jose D. Lopez, Victor M. Martinez, Carolina Paniagua, Edison Ramirez, Daniel A. Rodriguez, Camilo Sanchez	juanm.daza@udea.edu.co, victoria.isaza@udea.edu.co, jdavid.lopez@udea.edu.co	Conservacion Biologica utilizando Inteligencia Artificial, Programa 852	Minciencias-UdeA-ITM-IAVH	Colombia	Meta	San Martin		Reserva Natural de la Sociedad Civil Rey Zamuro-Matarredonda	3.54506	-73.3938	Celular	Exacta	WGS84			2022	9	3	2022	9	11	Funcional	AudioMoth 1.0.0	Ziploc bag	G0027	built_in		Mono	192000		Medium	Alkaline AA	32GB Sandisk Extreme		En borde de bosque, apuntando a sabana	1.5
Pasivo	RZUF05		Juan M. Daza, Claudia V. Isaza, Jose D. Lopez, Victor M. Martinez, Carolina Paniagua, Edison Ramirez, Daniel A. Rodriguez, Camilo Sanchez	Juan M. Daza, Claudia V. Isaza, Jose D. Lopez, Victor M. Martinez, Carolina Paniagua, Edison Ramirez, Daniel A. Rodriguez, Camilo Sanchez	juanm.daza@udea.edu.co, victoria.isaza@udea.edu.co, jdavid.lopez@udea.edu.co	Conservacion Biologica utilizando Inteligencia Artificial, Programa 852	Minciencias-UdeA-ITM-IAVH	Colombia	Meta	San Martin		Reserva Natural de la Sociedad Civil Rey Zamuro-Matarredonda	3.54159	-73.3933	Celular	Exacta	WGS84			2022	9	3	2022	9	12	Bolsa muy rota por hormigas, hasta la cinta de las pilad	AudioMoth 1.2.0	Ziploc bag	G0058	built_in		Mono	192000		Medium	Alkaline AA	32GB Sandisk Extreme		En borde, en parche, rodeado de colinas	1.5
Pasivo	RZUF06		Juan M. Daza, Claudia V. Isaza, Jose D. Lopez, Victor M. Martinez, Carolina Paniagua, Edison Ramirez, Daniel A. Rodriguez, Camilo Sanchez	Juan M. Daza, Claudia V. Isaza, Jose D. Lopez, Victor M. Martinez, Carolina Paniagua, Edison Ramirez, Daniel A. Rodriguez, Camilo Sanchez	juanm.daza@udea.edu.co, victoria.isaza@udea.edu.co, jdavid.lopez@udea.edu.co	Conservacion Biologica utilizando Inteligencia Artificial, Programa 852	Minciencias-UdeA-ITM-IAVH	Colombia	Meta	San Martin		Reserva Natural de la Sociedad Civil Rey Zamuro-Matarredonda	3.53788	-73.3936	Celular	Exacta	WGS84			2022	9	3	2022	9	12	Húmeda	AudioMoth 1.2.0	Ziploc bag	G0064	built_in		Mono	192000		Medium	Alkaline AA	32GB Sandisk Extreme		En borde de pequeño fragmento, apuntando a sabana	1.5
Pasivo	RZUF07		Juan M. Daza, Claudia V. Isaza, Jose D. Lopez, Victor M. Martinez, Carolina Paniagua, Edison Ramirez, Daniel A. Rodriguez, Camilo Sanchez	Juan M. Daza, Claudia V. Isaza, Jose D. Lopez, Victor M. Martinez, Carolina Paniagua, Edison Ramirez, Daniel A. Rodriguez, Camilo Sanchez	juanm.daza@udea.edu.co, victoria.isaza@udea.edu.co, jdavid.lopez@udea.edu.co	Conservacion Biologica utilizando Inteligencia Artificial, Programa 852	Minciencias-UdeA-ITM-IAVH	Colombia	Meta	San Martin		Reserva Natural de la Sociedad Civil Rey Zamuro-Matarredonda	3.5341	-73.3937	Celular	Exacta	WGS84			2022	9	4	2022	9	13	Funcional	AudioMoth 1.1.0	Ziploc bag	G0096	built_in		Mono	192000		Medium	Alkaline AA	32GB Sandisk Extreme		En borde de bosque, apuntando a sabana y con cercanía a colina.	1.5		Temperature
Pasivo	RZUF08		Juan M. Daza, Claudia V. Isaza, Jose D. Lopez, Victor M. Martinez, Carolina Paniagua, Edison Ramirez, Daniel A. Rodriguez, Camilo Sanchez	Juan M. Daza, Claudia V. Isaza, Jose D. Lopez, Victor M. Martinez, Carolina Paniagua, Edison Ramirez, Daniel A. Rodriguez, Camilo Sanchez	juanm.daza@udea.edu.co, victoria.isaza@udea.edu.co, jdavid.lopez@udea.edu.co	Conservacion Biologica utilizando Inteligencia Artificial, Programa 852	Minciencias-UdeA-ITM-IAVH	Colombia	Meta	San Martin		Reserva Natural de la Sociedad Civil Rey Zamuro-Matarredonda	3.53061	-73.3935	Celular	Exacta	WGS84			2022	9	5	2022	9	13	Datos rescatados en Linux. Pilas poniente	AudioMoth 1.2.0	Ziploc bag	G0081	built_in		Mono	192000		Medium	Alkaline AA	32GB Sandisk Extreme		En pastizal. Pilas en poniente	1.5
Pasivo	RZUF09		Juan M. Daza, Claudia V. Isaza, Jose D. Lopez, Victor M. Martinez, Carolina Paniagua, Edison Ramirez, Daniel A. Rodriguez, Camilo Sanchez	Juan M. Daza, Claudia V. Isaza, Jose D. Lopez, Victor M. Martinez, Carolina Paniagua, Edison Ramirez, Daniel A. Rodriguez, Camilo Sanchez	juanm.daza@udea.edu.co, victoria.isaza@udea.edu.co, jdavid.lopez@udea.edu.co	Conservacion Biologica utilizando Inteligencia Artificial, Programa 852	Minciencias-UdeA-ITM-IAVH	Colombia	Meta	San Martin		Reserva Natural de la Sociedad Civil Rey Zamuro-Matarredonda	3.52703	-73.3936	Celular	Exacta	WGS84			2022	9	5	2022	9	13	Funcional	AudioMoth 1.2.0	Ziploc bag	G0104	built_in		Mono	192000		Medium	Alkaline AA	32GB Sandisk Extreme		En bosque	1.5		Temperature
Pasivo	RZUF10		Juan M. Daza, Claudia V. Isaza, Jose D. Lopez, Victor M. Martinez, Carolina Paniagua, Edison Ramirez, Daniel A. Rodriguez, Camilo Sanchez	Juan M. Daza, Claudia V. Isaza, Jose D. Lopez, Victor M. Martinez, Carolina Paniagua, Edison Ramirez, Daniel A. Rodriguez, Camilo Sanchez	juanm.daza@udea.edu.co, victoria.isaza@udea.edu.co, jdavid.lopez@udea.edu.co	Conservacion Biologica utilizando Inteligencia Artificial, Programa 852	Minciencias-UdeA-ITM-IAVH	Colombia	Meta	San Martin		Reserva Natural de la Sociedad Civil Rey Zamuro-Matarredonda	3.52339	-73.3934	Celular	Exacta	WGS84			2022	9	4	2022	9	12	Funcional	AudioMoth 1.2.0	Ziploc bag	G0038	built_in		Mono	192000		Medium	Alkaline AA	32GB Sandisk Extreme		En pastizal, rodeado de vegetación rastrera	1.5		Temperature
Pasivo	RZUF11		Juan M. Daza, Claudia V. Isaza, Jose D. Lopez, Victor M. Martinez, Carolina Paniagua, Edison Ramirez, Daniel A. Rodriguez, Camilo Sanchez	Juan M. Daza, Claudia V. Isaza, Jose D. Lopez, Victor M. Martinez, Carolina Paniagua, Edison Ramirez, Daniel A. Rodriguez, Camilo Sanchez	juanm.daza@udea.edu.co, victoria.isaza@udea.edu.co, jdavid.lopez@udea.edu.co	Conservacion Biologica utilizando Inteligencia Artificial, Programa 852	Minciencias-UdeA-ITM-IAVH	Colombia	Meta	San Martin		Reserva Natural de la Sociedad Civil Rey Zamuro-Matarredonda	3.51957	-73.3934	Celular	Exacta	WGS84			2022	9	4	2022	9	12	Funcional	AudioMoth 1.2.0	Ziploc bag	G0069	built_in		Mono	192000		Medium	Alkaline AA	32GB Sandisk Extreme		En pastizal, rodeado de vegetación rastrera. Apuntando a parte baja de colina.	1.5		Temperature
Pasivo	RZUF12		Juan M. Daza, Claudia V. Isaza, Jose D. Lopez, Victor M. Martinez, Carolina Paniagua, Edison Ramirez, Daniel A. Rodriguez, Camilo Sanchez	Juan M. Daza, Claudia V. Isaza, Jose D. Lopez, Victor M. Martinez, Carolina Paniagua, Edison Ramirez, Daniel A. Rodriguez, Camilo Sanchez	juanm.daza@udea.edu.co, victoria.isaza@udea.edu.co, jdavid.lopez@udea.edu.co	Conservacion Biologica utilizando Inteligencia Artificial, Programa 852	Minciencias-UdeA-ITM-IAVH	Colombia	Meta	San Martin		Reserva Natural de la Sociedad Civil Rey Zamuro-Matarredonda	3.51618	-73.3934	Celular	Exacta	WGS84			2022	9	4	2022	9	12	Funcional	AudioMoth 1.2.0	Ziploc bag	G0053	built_in		Mono	192000		Medium	Alkaline AA	32GB Sandisk Extreme		En bosque	1.5		Temperature
Pasivo	RZUF13		Juan M. Daza, Claudia V. Isaza, Jose D. Lopez, Victor M. Martinez, Carolina Paniagua, Edison Ramirez, Daniel A. Rodriguez, Camilo Sanchez	Juan M. Daza, Claudia V. Isaza, Jose D. Lopez, Victor M. Martinez, Carolina Paniagua, Edison Ramirez, Daniel A. Rodriguez, Camilo Sanchez	juanm.daza@udea.edu.co, victoria.isaza@udea.edu.co, jdavid.lopez@udea.edu.co	Conservacion Biologica utilizando Inteligencia Artificial, Programa 852	Minciencias-UdeA-ITM-IAVH	Colombia	Meta	San Martin		Reserva Natural de la Sociedad Civil Rey Zamuro-Matarredonda	3.51244	-73.3937	Celular	Exacta	WGS84			2022	9	4	2022	9	12	Funcional	AudioMoth 1.2.0	Ziploc bag	G0088	built_in		Mono	192000		Medium	Alkaline AA	32GB Sandisk Extreme		En bosque	1.5		Temperature
Pasivo	RZUG02		Juan M. Daza, Claudia V. Isaza, Jose D. Lopez, Victor M. Martinez, Carolina Paniagua, Edison Ramirez, Daniel A. Rodriguez, Camilo Sanchez	Juan M. Daza, Claudia V. Isaza, Jose D. Lopez, Victor M. Martinez, Carolina Paniagua, Edison Ramirez, Daniel A. Rodriguez, Camilo Sanchez	juanm.daza@udea.edu.co, victoria.isaza@udea.edu.co, jdavid.lopez@udea.edu.co	Conservacion Biologica utilizando Inteligencia Artificial, Programa 852	Minciencias-UdeA-ITM-IAVH	Colombia	Meta	San Martin		Reserva Natural de la Sociedad Civil Rey Zamuro-Matarredonda	3.55241	-73.3902	Celular	Exacta	WGS84			2022	9	3	2022	9	11	Funcional	AudioMoth 1.0.0	Ziploc bag	G0029	built_in		Mono	192000		Medium	Alkaline AA	32GB Sandisk Extreme		En bosque	1.5
Pasivo	RZUG03		Juan M. Daza, Claudia V. Isaza, Jose D. Lopez, Victor M. Martinez, Carolina Paniagua, Edison Ramirez, Daniel A. Rodriguez, Camilo Sanchez	Juan M. Daza, Claudia V. Isaza, Jose D. Lopez, Victor M. Martinez, Carolina Paniagua, Edison Ramirez, Daniel A. Rodriguez, Camilo Sanchez	juanm.daza@udea.edu.co, victoria.isaza@udea.edu.co, jdavid.lopez@udea.edu.co	Conservacion Biologica utilizando Inteligencia Artificial, Programa 852	Minciencias-UdeA-ITM-IAVH	Colombia	Meta	San Martin		Reserva Natural de la Sociedad Civil Rey Zamuro-Matarredonda	3.54856	-73.3901	Celular	Exacta	WGS84			2022	9	3	2022	9	11	Funcional	AudioMoth 1.1.0	Ziploc bag	G0019	built_in		Mono	192000		Medium	Alkaline AA	32GB Sandisk Extreme		En bosque	1.5
Pasivo	RZUG04		Juan M. Daza, Claudia V. Isaza, Jose D. Lopez, Victor M. Martinez, Carolina Paniagua, Edison Ramirez, Daniel A. Rodriguez, Camilo Sanchez	Juan M. Daza, Claudia V. Isaza, Jose D. Lopez, Victor M. Martinez, Carolina Paniagua, Edison Ramirez, Daniel A. Rodriguez, Camilo Sanchez	juanm.daza@udea.edu.co, victoria.isaza@udea.edu.co, jdavid.lopez@udea.edu.co	Conservacion Biologica utilizando Inteligencia Artificial, Programa 852	Minciencias-UdeA-ITM-IAVH	Colombia	Meta	San Martin		Reserva Natural de la Sociedad Civil Rey Zamuro-Matarredonda	3.54501	-73.3899	Celular	Exacta	WGS84			2022	9	3	2022	9	12	Funcional	AudioMoth 1.1.0	Ziploc bag	G0017	built_in		Mono	192000		Medium	Alkaline AA	32GB Sandisk Extreme		En árbol aislado, en medio de sabana	1.5
Pasivo	RZUG05		Juan M. Daza, Claudia V. Isaza, Jose D. Lopez, Victor M. Martinez, Carolina Paniagua, Edison Ramirez, Daniel A. Rodriguez, Camilo Sanchez	Juan M. Daza, Claudia V. Isaza, Jose D. Lopez, Victor M. Martinez, Carolina Paniagua, Edison Ramirez, Daniel A. Rodriguez, Camilo Sanchez	juanm.daza@udea.edu.co, victoria.isaza@udea.edu.co, jdavid.lopez@udea.edu.co	Conservacion Biologica utilizando Inteligencia Artificial, Programa 852	Minciencias-UdeA-ITM-IAVH	Colombia	Meta	San Martin		Reserva Natural de la Sociedad Civil Rey Zamuro-Matarredonda	3.54138	-73.39	Celular	Exacta	WGS84			2022	9	3	2022	9	12	Húmeda. Archivos fantasma	AudioMoth 1.2.0	Ziploc bag	G0079	built_in		Mono	192000		Medium	Alkaline AA	32GB Sandisk Extreme		En pastizal, en falda con barranco atrás y apuntando hacía bosque.	1.5
Pasivo	RZUG06		Juan M. Daza, Claudia V. Isaza, Jose D. Lopez, Victor M. Martinez, Carolina Paniagua, Edison Ramirez, Daniel A. Rodriguez, Camilo Sanchez	Juan M. Daza, Claudia V. Isaza, Jose D. Lopez, Victor M. Martinez, Carolina Paniagua, Edison Ramirez, Daniel A. Rodriguez, Camilo Sanchez	juanm.daza@udea.edu.co, victoria.isaza@udea.edu.co, jdavid.lopez@udea.edu.co	Conservacion Biologica utilizando Inteligencia Artificial, Programa 852	Minciencias-UdeA-ITM-IAVH	Colombia	Meta	San Martin		Reserva Natural de la Sociedad Civil Rey Zamuro-Matarredonda	3.53769	-73.39	Celular	Exacta	WGS84			2022	9	4	2022	9	13	Funcional. Información rescatada en linux	AudioMoth 1.2.0	Ziploc bag	G0046	built_in		Mono	192000		Medium	Alkaline AA	32GB Sandisk Extreme		En parche pequeño, cercano a sabana	1.5		Temperature
Pasivo	RZUG07		Juan M. Daza, Claudia V. Isaza, Jose D. Lopez, Victor M. Martinez, Carolina Paniagua, Edison Ramirez, Daniel A. Rodriguez, Camilo Sanchez	Juan M. Daza, Claudia V. Isaza, Jose D. Lopez, Victor M. Martinez, Carolina Paniagua, Edison Ramirez, Daniel A. Rodriguez, Camilo Sanchez	juanm.daza@udea.edu.co, victoria.isaza@udea.edu.co, jdavid.lopez@udea.edu.co	Conservacion Biologica utilizando Inteligencia Artificial, Programa 852	Minciencias-UdeA-ITM-IAVH	Colombia	Meta	San Martin		Reserva Natural de la Sociedad Civil Rey Zamuro-Matarredonda	3.53421	-73.3901	Celular	Exacta	WGS84			2022	9	4	2022	9	13	Ligeramente húmeda. Alumbra verde	AudioMoth 1.2.0	Ziploc bag	G0061	built_in		Mono	192000		Medium	Alkaline AA	32GB Sandisk Extreme		En borde, apuntando hacía barranco y sabana.	1.5		Temperature
Pasivo	RZUG08		Juan M. Daza, Claudia V. Isaza, Jose D. Lopez, Victor M. Martinez, Carolina Paniagua, Edison Ramirez, Daniel A. Rodriguez, Camilo Sanchez	Juan M. Daza, Claudia V. Isaza, Jose D. Lopez, Victor M. Martinez, Carolina Paniagua, Edison Ramirez, Daniel A. Rodriguez, Camilo Sanchez	juanm.daza@udea.edu.co, victoria.isaza@udea.edu.co, jdavid.lopez@udea.edu.co	Conservacion Biologica utilizando Inteligencia Artificial, Programa 852	Minciencias-UdeA-ITM-IAVH	Colombia	Meta	San Martin		Reserva Natural de la Sociedad Civil Rey Zamuro-Matarredonda	3.53067	-73.39	Celular	Exacta	WGS84			2022	9	5	2022	9	13	Funcional	AudioMoth 1.2.0	Ziploc bag	G0041	built_in		Mono	192000		Medium	Alkaline AA	32GB Sandisk Extreme		En sabana	1.5
Pasivo	RZUG09		Juan M. Daza, Claudia V. Isaza, Jose D. Lopez, Victor M. Martinez, Carolina Paniagua, Edison Ramirez, Daniel A. Rodriguez, Camilo Sanchez	Juan M. Daza, Claudia V. Isaza, Jose D. Lopez, Victor M. Martinez, Carolina Paniagua, Edison Ramirez, Daniel A. Rodriguez, Camilo Sanchez	juanm.daza@udea.edu.co, victoria.isaza@udea.edu.co, jdavid.lopez@udea.edu.co	Conservacion Biologica utilizando Inteligencia Artificial, Programa 852	Minciencias-UdeA-ITM-IAVH	Colombia	Meta	San Martin		Reserva Natural de la Sociedad Civil Rey Zamuro-Matarredonda	3.52696	-73.39	Celular	Exacta	WGS84			2022	9	5	2022	9	13	Funcional	AudioMoth 1.0.0	Ziploc bag	G0010	built_in		Mono	192000		Medium	Alkaline AA	32GB Sandisk Extreme		En sabana, cercano a parches de bosque	1.5		Temperature
Pasivo	RZUG10		Juan M. Daza, Claudia V. Isaza, Jose D. Lopez, Victor M. Martinez, Carolina Paniagua, Edison Ramirez, Daniel A. Rodriguez, Camilo Sanchez	Juan M. Daza, Claudia V. Isaza, Jose D. Lopez, Victor M. Martinez, Carolina Paniagua, Edison Ramirez, Daniel A. Rodriguez, Camilo Sanchez	juanm.daza@udea.edu.co, victoria.isaza@udea.edu.co, jdavid.lopez@udea.edu.co	Conservacion Biologica utilizando Inteligencia Artificial, Programa 852	Minciencias-UdeA-ITM-IAVH	Colombia	Meta	San Martin		Reserva Natural de la Sociedad Civil Rey Zamuro-Matarredonda	3.5233	-73.3897	Celular	Exacta	WGS84			2022	9	4	2022	9	12	Funcional	AudioMoth 1.2.0	Ziploc bag	G0100	built_in		Mono	192000		Medium	Alkaline AA	32GB Sandisk Extreme		En pequeño fragmento de vegetación arbórea pequeña, rodeado de sabana	1.5		Temperature
Pasivo	RZUG11		Juan M. Daza, Claudia V. Isaza, Jose D. Lopez, Victor M. Martinez, Carolina Paniagua, Edison Ramirez, Daniel A. Rodriguez, Camilo Sanchez	Juan M. Daza, Claudia V. Isaza, Jose D. Lopez, Victor M. Martinez, Carolina Paniagua, Edison Ramirez, Daniel A. Rodriguez, Camilo Sanchez	juanm.daza@udea.edu.co, victoria.isaza@udea.edu.co, jdavid.lopez@udea.edu.co	Conservacion Biologica utilizando Inteligencia Artificial, Programa 852	Minciencias-UdeA-ITM-IAVH	Colombia	Meta	San Martin		Reserva Natural de la Sociedad Civil Rey Zamuro-Matarredonda	3.51917	-73.3895	Celular	Exacta	WGS84			2022	9	4	2022	9	12	Funcional	AudioMoth 1.1.0	Ziploc bag	G0024	built_in		Mono	192000		Medium	Alkaline AA	32GB Sandisk Extreme		En pequeño fragmento de vegetación arbórea pequeña, rodeado de sabana	1.5		Temperature
Pasivo	RZUG12		Juan M. Daza, Claudia V. Isaza, Jose D. Lopez, Victor M. Martinez, Carolina Paniagua, Edison Ramirez, Daniel A. Rodriguez, Camilo Sanchez	Juan M. Daza, Claudia V. Isaza, Jose D. Lopez, Victor M. Martinez, Carolina Paniagua, Edison Ramirez, Daniel A. Rodriguez, Camilo Sanchez	juanm.daza@udea.edu.co, victoria.isaza@udea.edu.co, jdavid.lopez@udea.edu.co	Conservacion Biologica utilizando Inteligencia Artificial, Programa 852	Minciencias-UdeA-ITM-IAVH	Colombia	Meta	San Martin		Reserva Natural de la Sociedad Civil Rey Zamuro-Matarredonda	3.51599	-73.3899	Celular	Exacta	WGS84			2022	9	4	2022	9	12	Buenas condiciones, alumbra rojo	AudioMoth 1.2.0	Ziploc bag	G0056	built_in		Mono	192000		Medium	Alkaline AA	32GB Sandisk Extreme		En sabana	1.5		Temperature
Pasivo	RZUG13		Juan M. Daza, Claudia V. Isaza, Jose D. Lopez, Victor M. Martinez, Carolina Paniagua, Edison Ramirez, Daniel A. Rodriguez, Camilo Sanchez	Juan M. Daza, Claudia V. Isaza, Jose D. Lopez, Victor M. Martinez, Carolina Paniagua, Edison Ramirez, Daniel A. Rodriguez, Camilo Sanchez	juanm.daza@udea.edu.co, victoria.isaza@udea.edu.co, jdavid.lopez@udea.edu.co	Conservacion Biologica utilizando Inteligencia Artificial, Programa 852	Minciencias-UdeA-ITM-IAVH	Colombia	Meta	San Martin		Reserva Natural de la Sociedad Civil Rey Zamuro-Matarredonda	3.51264	-73.39	Celular	Exacta	WGS84			2022	9	3	2022	9	12	Funcional	AudioMoth 1.2.0	Ziploc bag	G0074	built_in		Mono	192000		Medium	Alkaline AA	32GB Sandisk Extreme		En borde de bosque	1.5		Temperature
Pasivo	RZUH02		Juan M. Daza, Claudia V. Isaza, Jose D. Lopez, Victor M. Martinez, Carolina Paniagua, Edison Ramirez, Daniel A. Rodriguez, Camilo Sanchez	Juan M. Daza, Claudia V. Isaza, Jose D. Lopez, Victor M. Martinez, Carolina Paniagua, Edison Ramirez, Daniel A. Rodriguez, Camilo Sanchez	juanm.daza@udea.edu.co, victoria.isaza@udea.edu.co, jdavid.lopez@udea.edu.co	Conservacion Biologica utilizando Inteligencia Artificial, Programa 852	Minciencias-UdeA-ITM-IAVH	Colombia	Meta	San Martin		Reserva Natural de la Sociedad Civil Rey Zamuro-Matarredonda	3.55245	-73.3863	Celular	Exacta	WGS84			2022	9	3	2022	9	12	Funcional	AudioMoth 1.2.0	Ziploc bag	G0044	built_in		Mono	192000		Medium	Alkaline AA	32GB Sandisk Extreme		En sabana, con bosque detrás y apuntando hacía sabana	1.5
Pasivo	RZUH03		Juan M. Daza, Claudia V. Isaza, Jose D. Lopez, Victor M. Martinez, Carolina Paniagua, Edison Ramirez, Daniel A. Rodriguez, Camilo Sanchez	Juan M. Daza, Claudia V. Isaza, Jose D. Lopez, Victor M. Martinez, Carolina Paniagua, Edison Ramirez, Daniel A. Rodriguez, Camilo Sanchez	juanm.daza@udea.edu.co, victoria.isaza@udea.edu.co, jdavid.lopez@udea.edu.co	Conservacion Biologica utilizando Inteligencia Artificial, Programa 852	Minciencias-UdeA-ITM-IAVH	Colombia	Meta	San Martin		Reserva Natural de la Sociedad Civil Rey Zamuro-Matarredonda	3.54895	-73.3858	Celular	Exacta	WGS84			2022	9	3	2022	9	12	Funcional	AudioMoth 1.2.0	Ziploc bag	G0050	built_in		Mono	192000		Medium	Alkaline AA	32GB Sandisk Extreme		Al interior de fragmento, despegado fuera del punto donde se ubicó.	1.5
Pasivo	RZUH04		Juan M. Daza, Claudia V. Isaza, Jose D. Lopez, Victor M. Martinez, Carolina Paniagua, Edison Ramirez, Daniel A. Rodriguez, Camilo Sanchez	Juan M. Daza, Claudia V. Isaza, Jose D. Lopez, Victor M. Martinez, Carolina Paniagua, Edison Ramirez, Daniel A. Rodriguez, Camilo Sanchez	juanm.daza@udea.edu.co, victoria.isaza@udea.edu.co, jdavid.lopez@udea.edu.co	Conservacion Biologica utilizando Inteligencia Artificial, Programa 852	Minciencias-UdeA-ITM-IAVH	Colombia	Meta	San Martin		Reserva Natural de la Sociedad Civil Rey Zamuro-Matarredonda	3.54488	-73.3866	Celular	Exacta	WGS84			2022	9	3	2022	9	12	No lee memoria. Rescatado en linux	AudioMoth 1.2.0	Ziploc bag	G0066	built_in		Mono	192000		Medium	Alkaline AA	32GB Sandisk Extreme		Cercano a borde, al interior de bosque. Adjunto a hilo de agua.	1.5
Pasivo	RZUH05		Juan M. Daza, Claudia V. Isaza, Jose D. Lopez, Victor M. Martinez, Carolina Paniagua, Edison Ramirez, Daniel A. Rodriguez, Camilo Sanchez	Juan M. Daza, Claudia V. Isaza, Jose D. Lopez, Victor M. Martinez, Carolina Paniagua, Edison Ramirez, Daniel A. Rodriguez, Camilo Sanchez	juanm.daza@udea.edu.co, victoria.isaza@udea.edu.co, jdavid.lopez@udea.edu.co	Conservacion Biologica utilizando Inteligencia Artificial, Programa 852	Minciencias-UdeA-ITM-IAVH	Colombia	Meta	San Martin		Reserva Natural de la Sociedad Civil Rey Zamuro-Matarredonda	3.54133	-73.3863	Celular	Exacta	WGS84			2022	9	4	2022	9	13	Funcional	AudioMoth 1.2.0	Ziploc bag	G0071	built_in		Mono	192000		Medium	Alkaline AA	32GB Sandisk Extreme		En sabana, en árbol aislado	1.5		Temperature
Pasivo	RZUH06		Juan M. Daza, Claudia V. Isaza, Jose D. Lopez, Victor M. Martinez, Carolina Paniagua, Edison Ramirez, Daniel A. Rodriguez, Camilo Sanchez	Juan M. Daza, Claudia V. Isaza, Jose D. Lopez, Victor M. Martinez, Carolina Paniagua, Edison Ramirez, Daniel A. Rodriguez, Camilo Sanchez	juanm.daza@udea.edu.co, victoria.isaza@udea.edu.co, jdavid.lopez@udea.edu.co	Conservacion Biologica utilizando Inteligencia Artificial, Programa 852	Minciencias-UdeA-ITM-IAVH	Colombia	Meta	San Martin		Reserva Natural de la Sociedad Civil Rey Zamuro-Matarredonda	3.53798	-73.3864	Celular	Exacta	WGS84			2022	9	4	2022	9	13	Funcional	AudioMoth 1.1.0	Ziploc bag	G0031	built_in		Mono	192000		Medium	Alkaline AA	32GB Sandisk Extreme		En pequeño fragmento de vegetación arbórea pequeño, rodeado de sabana y cercano a colinas	1.5		Temperature
Pasivo	RZUH07		Juan M. Daza, Claudia V. Isaza, Jose D. Lopez, Victor M. Martinez, Carolina Paniagua, Edison Ramirez, Daniel A. Rodriguez, Camilo Sanchez	Juan M. Daza, Claudia V. Isaza, Jose D. Lopez, Victor M. Martinez, Carolina Paniagua, Edison Ramirez, Daniel A. Rodriguez, Camilo Sanchez	juanm.daza@udea.edu.co, victoria.isaza@udea.edu.co, jdavid.lopez@udea.edu.co	Conservacion Biologica utilizando Inteligencia Artificial, Programa 852	Minciencias-UdeA-ITM-IAVH	Colombia	Meta	San Martin		Reserva Natural de la Sociedad Civil Rey Zamuro-Matarredonda	3.53427	-73.3864	Celular	Exacta	WGS84			2022	9	4	2022	9	13	Funcional	AudioMoth 1.2.0	Ziploc bag	G0101	built_in		Mono	192000		Medium	Alkaline AA	32GB Sandisk Extreme		En bosque	1.5		Temperature
Pasivo	RZUH08		Juan M. Daza, Claudia V. Isaza, Jose D. Lopez, Victor M. Martinez, Carolina Paniagua, Edison Ramirez, Daniel A. Rodriguez, Camilo Sanchez	Juan M. Daza, Claudia V. Isaza, Jose D. Lopez, Victor M. Martinez, Carolina Paniagua, Edison Ramirez, Daniel A. Rodriguez, Camilo Sanchez	juanm.daza@udea.edu.co, victoria.isaza@udea.edu.co, jdavid.lopez@udea.edu.co	Conservacion Biologica utilizando Inteligencia Artificial, Programa 852	Minciencias-UdeA-ITM-IAVH	Colombia	Meta	San Martin		Reserva Natural de la Sociedad Civil Rey Zamuro-Matarredonda	3.5305	-73.3865	Celular	Exacta	WGS84			2022	9	5	2022	9	13	Funcional	AudioMoth 1.1.0	Ziploc bag	G0028	built_in		Mono	192000		Medium	Alkaline AA	32GB Sandisk Extreme		En sabana, apuntando a un fragmento ubicado a unos 50m; con una colina atrás.	1.5
Pasivo	RZUH09		Juan M. Daza, Claudia V. Isaza, Jose D. Lopez, Victor M. Martinez, Carolina Paniagua, Edison Ramirez, Daniel A. Rodriguez, Camilo Sanchez	Juan M. Daza, Claudia V. Isaza, Jose D. Lopez, Victor M. Martinez, Carolina Paniagua, Edison Ramirez, Daniel A. Rodriguez, Camilo Sanchez	juanm.daza@udea.edu.co, victoria.isaza@udea.edu.co, jdavid.lopez@udea.edu.co	Conservacion Biologica utilizando Inteligencia Artificial, Programa 852	Minciencias-UdeA-ITM-IAVH	Colombia	Meta	San Martin		Reserva Natural de la Sociedad Civil Rey Zamuro-Matarredonda	3.52717	-73.3864	Celular	Exacta	WGS84			2022	9	5	2022	9	13	buenas condiciones, manchada por savia del árbol. en paso de danta	AudioMoth 1.2.0	Ziploc bag	G0078	built_in		Mono	192000		Medium	Alkaline AA	32GB Sandisk Extreme		En borde de bosque, apuntando a sector con claro.	1.5		Temperature
Pasivo	RZUH10		Juan M. Daza, Claudia V. Isaza, Jose D. Lopez, Victor M. Martinez, Carolina Paniagua, Edison Ramirez, Daniel A. Rodriguez, Camilo Sanchez	Juan M. Daza, Claudia V. Isaza, Jose D. Lopez, Victor M. Martinez, Carolina Paniagua, Edison Ramirez, Daniel A. Rodriguez, Camilo Sanchez	juanm.daza@udea.edu.co, victoria.isaza@udea.edu.co, jdavid.lopez@udea.edu.co	Conservacion Biologica utilizando Inteligencia Artificial, Programa 852	Minciencias-UdeA-ITM-IAVH	Colombia	Meta	San Martin		Reserva Natural de la Sociedad Civil Rey Zamuro-Matarredonda	3.52351	-73.3865	Celular	Exacta	WGS84			2022	9	4	2022	9	12	buenas condiciones, un poco húmeda, alumbra verde	AudioMoth 1.2.0	Ziploc bag	G0055	built_in		Mono	192000		Medium	Alkaline AA	32GB Sandisk Extreme		En borde de fragmento de bosque, apuntando a sabana pero con cercanía a otros fragmentso de bosque.	1.5		Temperature
Pasivo	RZUH11		Juan M. Daza, Claudia V. Isaza, Jose D. Lopez, Victor M. Martinez, Carolina Paniagua, Edison Ramirez, Daniel A. Rodriguez, Camilo Sanchez	Juan M. Daza, Claudia V. Isaza, Jose D. Lopez, Victor M. Martinez, Carolina Paniagua, Edison Ramirez, Daniel A. Rodriguez, Camilo Sanchez	juanm.daza@udea.edu.co, victoria.isaza@udea.edu.co, jdavid.lopez@udea.edu.co	Conservacion Biologica utilizando Inteligencia Artificial, Programa 852	Minciencias-UdeA-ITM-IAVH	Colombia	Meta	San Martin		Reserva Natural de la Sociedad Civil Rey Zamuro-Matarredonda	3.51959	-73.3863	Celular	Exacta	WGS84			2022	9	4	2022	9	12	Funcional	AudioMoth 1.2.0	Ziploc bag	G0060	built_in		Mono	192000		Medium	Alkaline AA	32GB Sandisk Extreme		En sabana, en cerca ubicada en pequeño árbol.	1.5		Temperature
Pasivo	RZUH12		Juan M. Daza, Claudia V. Isaza, Jose D. Lopez, Victor M. Martinez, Carolina Paniagua, Edison Ramirez, Daniel A. Rodriguez, Camilo Sanchez	Juan M. Daza, Claudia V. Isaza, Jose D. Lopez, Victor M. Martinez, Carolina Paniagua, Edison Ramirez, Daniel A. Rodriguez, Camilo Sanchez	juanm.daza@udea.edu.co, victoria.isaza@udea.edu.co, jdavid.lopez@udea.edu.co	Conservacion Biologica utilizando Inteligencia Artificial, Programa 852	Minciencias-UdeA-ITM-IAVH	Colombia	Meta	San Martin		Reserva Natural de la Sociedad Civil Rey Zamuro-Matarredonda	3.51603	-73.3865	Celular	Exacta	WGS84			2022	9	4	2022	9	12	Funcional	AudioMoth 1.0.0	Ziploc bag	G0009	built_in		Mono	192000		Medium	Alkaline AA	32GB Sandisk Extreme		En sabana	1.5		Temperature
Pasivo	RZUH13		Juan M. Daza, Claudia V. Isaza, Jose D. Lopez, Victor M. Martinez, Carolina Paniagua, Edison Ramirez, Daniel A. Rodriguez, Camilo Sanchez	Juan M. Daza, Claudia V. Isaza, Jose D. Lopez, Victor M. Martinez, Carolina Paniagua, Edison Ramirez, Daniel A. Rodriguez, Camilo Sanchez	juanm.daza@udea.edu.co, victoria.isaza@udea.edu.co, jdavid.lopez@udea.edu.co	Conservacion Biologica utilizando Inteligencia Artificial, Programa 852	Minciencias-UdeA-ITM-IAVH	Colombia	Meta	San Martin		Reserva Natural de la Sociedad Civil Rey Zamuro-Matarredonda	3.51251	-73.3864	Celular	Exacta	WGS84			2022	9	4	2022	9	12	Funcional	AudioMoth 1.2.0	Ziploc bag	G0049	built_in		Mono	192000		Medium	Alkaline AA	32GB Sandisk Extreme		En borde de bosque, apuntando hacía sabana.	1.5		Temperature
Pasivo	RZAC10		Juan M. Daza, Claudia V. Isaza, Jose D. Lopez, Victor M. Martinez, Carolina Paniagua, Edison Ramirez, Daniel A. Rodriguez, Camilo Sanchez	Juan M. Daza, Claudia V. Isaza, Jose D. Lopez, Victor M. Martinez, Carolina Paniagua, Edison Ramirez, Daniel A. Rodriguez, Camilo Sanchez	juanm.daza@udea.edu.co, victoria.isaza@udea.edu.co, jdavid.lopez@udea.edu.co	Conservacion Biologica utilizando Inteligencia Artificial, Programa 852	Minciencias-UdeA-ITM-IAVH	Colombia	Meta	San Martin		Reserva Natural de la Sociedad Civil Rey Zamuro-Matarredonda	3.52355	-73.4041	Celular	Exacta	WGS84			2022	9	4	2022	9	12	fallando, alumbra verde y rojo. húmeda, baja	AudioMoth 1.0.0	Ziploc bag	G0003	built_in		Mono	48000		Medium	Alkaline AA	32GB Sandisk Extreme		Ubicada en bosque, en área con pequeño humedal, y cercana a claro	1.5		Temperature
Pasivo	RZAA08		Juan M. Daza, Claudia V. Isaza, Jose D. Lopez, Victor M. Martinez, Carolina Paniagua, Edison Ramirez, Daniel A. Rodriguez, Camilo Sanchez	Juan M. Daza, Claudia V. Isaza, Jose D. Lopez, Victor M. Martinez, Carolina Paniagua, Edison Ramirez, Daniel A. Rodriguez, Camilo Sanchez	juanm.daza@udea.edu.co, victoria.isaza@udea.edu.co, jdavid.lopez@udea.edu.co	Conservacion Biologica utilizando Inteligencia Artificial, Programa 852	Minciencias-UdeA-ITM-IAVH	Colombia	Meta	San Martin		Reserva Natural de la Sociedad Civil Rey Zamuro-Matarredonda	3.5307	-73.4116	Celular	Exacta	WGS84			2022	9	4	2022	9	10	Funcional	AudioMoth 1.0.0	Ziploc bag	G0001	built_in		Mono	48000		Medium	Alkaline AA	32GB Sandisk Extreme		Bosque	1.5		Temperature
Pasivo	RZUD01M		Juan M. Daza, Claudia V. Isaza, Jose D. Lopez, Victor M. Martinez, Carolina Paniagua, Edison Ramirez, Daniel A. Rodriguez, Camilo Sanchez	Juan M. Daza, Claudia V. Isaza, Jose D. Lopez, Victor M. Martinez, Carolina Paniagua, Edison Ramirez, Daniel A. Rodriguez, Camilo Sanchez	juanm.daza@udea.edu.co, victoria.isaza@udea.edu.co, jdavid.lopez@udea.edu.co	Conservacion Biologica utilizando Inteligencia Artificial, Programa 852	Minciencias-UdeA-ITM-IAVH	Colombia	Meta	San Martin		Reserva Natural de la Sociedad Civil Rey Zamuro-Matarredonda	3.55576	-73.4008	Celular	Exacta	WGS84			2022	9	3	2022	9	11	Funcional. Micrófono externo	AudioMoth 1.2.0	Ziploc bag	G0095	built_in		Mono	192000		Medium	Alkaline AA	32GB Sandisk Extreme		Bosque	1.5		Temperature
Pasivo	RZAE10		Juan M. Daza, Claudia V. Isaza, Jose D. Lopez, Victor M. Martinez, Carolina Paniagua, Edison Ramirez, Daniel A. Rodriguez, Camilo Sanchez	Juan M. Daza, Claudia V. Isaza, Jose D. Lopez, Victor M. Martinez, Carolina Paniagua, Edison Ramirez, Daniel A. Rodriguez, Camilo Sanchez	juanm.daza@udea.edu.co, victoria.isaza@udea.edu.co, jdavid.lopez@udea.edu.co	Conservacion Biologica utilizando Inteligencia Artificial, Programa 852	Minciencias-UdeA-ITM-IAVH	Colombia	Meta	San Martin		Reserva Natural de la Sociedad Civil Rey Zamuro-Matarredonda	3.5232	-73.3971	Celular	Exacta	WGS84			2022	9	4	2022	9	12	Funcional	AudioMoth 1.0.0	Ziploc bag	G0007	built_in		Mono	48000		Medium	Alkaline AA	32GB Sandisk Extreme		En bosque, en filo	1.5		Temperature
Pasivo	RZAA06		Juan M. Daza, Claudia V. Isaza, Jose D. Lopez, Victor M. Martinez, Carolina Paniagua, Edison Ramirez, Daniel A. Rodriguez, Camilo Sanchez	Juan M. Daza, Claudia V. Isaza, Jose D. Lopez, Victor M. Martinez, Carolina Paniagua, Edison Ramirez, Daniel A. Rodriguez, Camilo Sanchez	juanm.daza@udea.edu.co, victoria.isaza@udea.edu.co, jdavid.lopez@udea.edu.co	Conservacion Biologica utilizando Inteligencia Artificial, Programa 852	Minciencias-UdeA-ITM-IAVH	Colombia	Meta	San Martin		Reserva Natural de la Sociedad Civil Rey Zamuro-Matarredonda	3.53785	-73.4115	Celular	Exacta	WGS84			2022	9	4	2022	9	13	Baja. perfectas condiciones. alumbra verde	AudioMoth 1.1.0	Ziploc bag	G0023	built_in		Mono	48000		Medium	Alkaline AA	32GB Sandisk Extreme		Ubicada en bosque, en filo con descenso de tierra atrás.	1.5		Temperature
Pasivo	RZAB11		Juan M. Daza, Claudia V. Isaza, Jose D. Lopez, Victor M. Martinez, Carolina Paniagua, Edison Ramirez, Daniel A. Rodriguez, Camilo Sanchez	Juan M. Daza, Claudia V. Isaza, Jose D. Lopez, Victor M. Martinez, Carolina Paniagua, Edison Ramirez, Daniel A. Rodriguez, Camilo Sanchez	juanm.daza@udea.edu.co, victoria.isaza@udea.edu.co, jdavid.lopez@udea.edu.co	Conservacion Biologica utilizando Inteligencia Artificial, Programa 852	Minciencias-UdeA-ITM-IAVH	Colombia	Meta	San Martin		Reserva Natural de la Sociedad Civil Rey Zamuro-Matarredonda	3.52039	-73.4076	Celular	Exacta	WGS84			2022	9	4	2022	9	10	Inundada, dañada	AudioMoth 1.0.0	Ziploc bag	G0005	built_in		Mono	48000		Medium	Alkaline AA	32GB Sandisk Extreme		En interior de bosque, cerca a pequeño arroyo.	1.5		Temperature
Pasivo	RZAC12		Juan M. Daza, Claudia V. Isaza, Jose D. Lopez, Victor M. Martinez, Carolina Paniagua, Edison Ramirez, Daniel A. Rodriguez, Camilo Sanchez	Juan M. Daza, Claudia V. Isaza, Jose D. Lopez, Victor M. Martinez, Carolina Paniagua, Edison Ramirez, Daniel A. Rodriguez, Camilo Sanchez	juanm.daza@udea.edu.co, victoria.isaza@udea.edu.co, jdavid.lopez@udea.edu.co	Conservacion Biologica utilizando Inteligencia Artificial, Programa 852	Minciencias-UdeA-ITM-IAVH	Colombia	Meta	San Martin		Reserva Natural de la Sociedad Civil Rey Zamuro-Matarredonda	3.51582	-73.4046	Celular	Exacta	WGS84			2022	9	4	2022	9	10	Funcional	AudioMoth 1.0.0	Ziploc bag	G0002	built_in		Mono	48000		Medium	Alkaline AA	32GB Sandisk Extreme		Ubicada en bosque, dando espalda a barranco y tras barranco, presencia de claro.	1.5		Temperature
Pasivo	RZAF04		Juan M. Daza, Claudia V. Isaza, Jose D. Lopez, Victor M. Martinez, Carolina Paniagua, Edison Ramirez, Daniel A. Rodriguez, Camilo Sanchez	Juan M. Daza, Claudia V. Isaza, Jose D. Lopez, Victor M. Martinez, Carolina Paniagua, Edison Ramirez, Daniel A. Rodriguez, Camilo Sanchez	juanm.daza@udea.edu.co, victoria.isaza@udea.edu.co, jdavid.lopez@udea.edu.co	Conservacion Biologica utilizando Inteligencia Artificial, Programa 852	Minciencias-UdeA-ITM-IAVH	Colombia	Meta	San Martin		Reserva Natural de la Sociedad Civil Rey Zamuro-Matarredonda	3.54506	-73.3938	Celular	Exacta	WGS84			2022	9	3	2022	9	11	Funcional	AudioMoth 1.0.0	Ziploc bag	G0008	built_in		Mono	48000		Medium	Alkaline AA	32GB Sandisk Extreme		En borde de bosque, apuntando a sabana	1.5		Temperature
