# Supplementary material for: A workflow to optimize spatial sampling in ecoacoustic studies
Source: Research Square preprint supplement (doi:10.21203/rs.3.rs-7207339/v1), 2025-10-10
Supplement: Supplementary file 31 [file AndeanRural_vif_correlation.xlsx]

## Sheet: Correlation_Matrix
	rescaled_Andes_SLAVI.tif	rescaled_Andes_MNDWI.tif	rescaled_Andes_NDVI.tif
rescaled_Andes_SLAVI.tif	1	-0.247132	0.803557
rescaled_Andes_MNDWI.tif	-0.247132	1	-0.643377
rescaled_Andes_NDVI.tif	0.803557	-0.643377	1

## Sheet: VIF
	Variable	VIF
0	rescaled_Andes_SLAVI.tif	28.0591
1	rescaled_Andes_MNDWI.tif	12.7652
2	rescaled_Andes_NDVI.tif	47.3292
