# Supplementary material for: A workflow to optimize spatial sampling in ecoacoustic studies
Source: Research Square preprint supplement (doi:10.21203/rs.3.rs-7207339/v1), 2025-10-10
Supplement: Supplementary file 34 [file AndeanUrban_vif_correlation.xlsx]

## Sheet: Correlation_Matrix
	rescaled_Urban_NDVI.tif	rescaled_Urban_MNDWI.tif	rescaled_Urban_SLAVI.tif
rescaled_Urban_NDVI.tif	1	-0.755683	0.8835
rescaled_Urban_MNDWI.tif	-0.755683	1	-0.530254
rescaled_Urban_SLAVI.tif	0.8835	-0.530254	1

## Sheet: VIF
	Variable	VIF
0	rescaled_Urban_NDVI.tif	36.7877
1	rescaled_Urban_MNDWI.tif	4.65965
2	rescaled_Urban_SLAVI.tif	29.7586
