# Supplementary material for: A workflow to optimize spatial sampling in ecoacoustic studies
Source: Research Square preprint supplement (doi:10.21203/rs.3.rs-7207339/v1), 2025-10-10
Supplement: Supplementary file 37 [file Plains_vif_correlation.xlsx]

## Sheet: Correlation_Matrix
	rescaled_Llanos_NDVI.tif	rescaled_Llanos_SLAVI.tif	rescaled_Llanos_MNDWI.tif
rescaled_Llanos_NDVI.tif	1	0.922715	-0.41627
rescaled_Llanos_SLAVI.tif	0.922715	1	-0.273363
rescaled_Llanos_MNDWI.tif	-0.41627	-0.273363	1

## Sheet: VIF
	Variable	VIF
0	rescaled_Llanos_NDVI.tif	72.1655
1	rescaled_Llanos_SLAVI.tif	41.0674
2	rescaled_Llanos_MNDWI.tif	12.9212
